# Supplementary material for: Transcriptomic Atlas of Human Trabecular Meshwork Uncovers the Cellular Landscape and Provides Insights into Glaucoma Pathophysiology
Source: Research Square preprint supplement (doi:10.21203/rs.3.rs-9540265/v1), 2026-06-22
Supplement: Supplementary file 1 [file 1004cdbedcdbcbb1a43253f1.xlsx]

## Sheet: in
baseMean	log2FoldChange	lfcSE	stat	pvalue	padj	gene	celltype	reg
51.4064	1.06747	0.321784	3.31734	0.000908782	0.0394778	ENSG00000215014	CM	up
8240.38	1.82357	0.324261	5.62377	1.86838e-08	1.9609e-05	ERRFI1	CM	up
1239.01	2.24029	0.654725	3.42172	0.000622258	0.0310987	ENSG00000290122	CM	up
634.248	1.0087	0.267888	3.76538	0.000166299	0.013944	PNRC2	CM	up
83.2967	-1.02767	0.305392	-3.36509	0.000765178	0.0352223	ENSG00000284602	CM	down
809.715	1.46025	0.342384	4.26494	1.99958e-05	0.0032587	ENSG00000225313	CM	up
208.278	5.29807	0.917485	5.77456	7.71544e-09	1.1488e-05	ENSG00000287400	CM	up
22.2625	2.22288	0.585463	3.79678	0.000146586	0.0128633	SCMH1-DT	CM	up
18.5059	1.69241	0.418007	4.04876	5.14891e-05	0.00616882	ENSG00000290102	CM	up
3453.35	1.48302	0.453873	3.26748	0.00108508	0.0437237	JUN	CM	up
20.4527	2.1189	0.603872	3.50887	0.00045002	0.0253383	ENSG00000288804	CM	up
59.2283	2.02445	0.580085	3.48992	0.000483168	0.0265217	LINC01707	CM	up
414.928	1.41515	0.247458	5.71873	1.07321e-08	1.3409e-05	CTH	CM	up
5.40662	1.60233	0.479028	3.34497	0.000822927	0.0368463	ENSG00000271992	CM	up
7.71375	1.84752	0.554105	3.33424	0.000855339	0.0378455	ENSG00000225605	CM	up
485.476	1.24534	0.297998	4.17903	2.9276e-05	0.00421169	DNAJB4	CM	up
8.57241	2.93883	0.494224	5.94635	2.74186e-09	5.53391e-06	ENSG00000284882	CM	up
932.188	2.2424	0.511365	4.38513	1.15918e-05	0.00230413	CCN1	CM	up
577.824	1.12332	0.339506	3.30869	0.000937336	0.0399899	F3	CM	up
103.127	1.6652	0.511905	3.25295	0.00114214	0.0450637	ENSG00000288736	CM	up
2.31228	4.49	1.31476	3.41508	0.000637643	0.0315129	ENSG00000223675	CM	up
66.2888	-1.13782	0.33464	-3.40013	0.000673536	0.0326659	PLPPR4	CM	down
60.6393	2.48496	0.471985	5.26491	1.40258e-07	0.000108238	ENSG00000288826	CM	up
4.77048	-2.49725	0.679281	-3.67631	0.000236635	0.0174918	GPR61	CM	down
54.0445	-1.05876	0.24995	-4.23589	2.27644e-05	0.00351349	KCNA2	CM	down
163.433	2.50377	0.583071	4.29411	1.75392e-05	0.002969	CHI3L2	CM	up
591.877	1.03419	0.255812	4.04277	5.2823e-05	0.00629986	BCAS2	CM	up
62.9039	2.34445	0.561615	4.17447	2.98675e-05	0.00425903	ENSG00000289041	CM	up
19.0893	1.96302	0.418566	4.68988	2.73367e-06	0.00086417	ENSG00000289457	CM	up
8.68227	1.62705	0.478982	3.39689	0.000681564	0.0329335	ENSG00000289288	CM	up
78.9456	1.29908	0.351535	3.69545	0.000219494	0.016693	FCGR2A	CM	up
107.559	2.56959	0.675272	3.80526	0.000141655	0.0124723	HSPA6	CM	up
82.5243	-1.95978	0.42982	-4.55954	5.1265e-06	0.00126895	RXRG	CM	down
21.7957	3.65131	0.719615	5.07398	3.89578e-07	0.000196572	ENSG00000236206	CM	up
76.7669	5.53635	1.15635	4.78778	1.68633e-06	0.000632083	ENSG00000289426	CM	up
11.7495	2.77704	0.645471	4.30234	1.69001e-05	0.00293659	RC3H1-DT	CM	up
221.399	-1.2926	0.327325	-3.94898	7.8484e-05	0.00811869	SEC16B	CM	down
15.5976	-1.30927	0.377581	-3.46752	0.000525279	0.0278294	LHX4	CM	down
74.5257	2.20065	0.450501	4.88489	1.03485e-06	0.000437944	IER5	CM	up
180.102	1.07346	0.234533	4.577	4.71699e-06	0.00120159	PACERR	CM	up
996.38	1.29975	0.291038	4.4659	7.97327e-06	0.00172895	CFH	CM	up
39.1549	3.13124	0.502757	6.22814	4.71998e-10	1.85349e-06	LINC01353	CM	up
42.2622	2.35515	0.523674	4.49736	6.88023e-06	0.00154293	ENSG00000288925	CM	up
9.37517	2.14163	0.63746	3.35963	0.000780478	0.035801	BTG2-DT	CM	up
816.064	1.3892	0.386696	3.59248	0.00032754	0.0210322	BTG2	CM	up
1892.31	-1.1507	0.308676	-3.72784	0.000193129	0.0153181	NFASC	CM	down
4.94565	4.00982	0.707103	5.67077	1.42154e-08	1.62167e-05	DYRK3-AS1	CM	up
33.9938	1.54296	0.464221	3.32377	0.000888086	0.0390312	ENSG00000289071	CM	up
6.61188	2.1058	0.647204	3.2537	0.00113914	0.0450222	LINC02771	CM	up
5.82549	3.32961	0.696459	4.78077	1.74625e-06	0.000645326	ENSG00000286213	CM	up
3445.43	1.95809	0.454935	4.30411	1.67659e-05	0.00293269	ATF3	CM	up
257.048	-1.15949	0.308163	-3.7626	0.000168157	0.0140513	LYPLAL1-DT	CM	down
48.4278	1.2921	0.260026	4.96913	6.72531e-07	0.000315105	ENSG00000288999	CM	up
54.5179	1.43462	0.384465	3.73148	0.000190359	0.0152742	ENSG00000289602	CM	up
20.324	3.70553	0.789329	4.69454	2.6721e-06	0.000855007	ENSG00000289341	CM	up
3.19955	3.24545	0.920069	3.5274	0.000419669	0.0244918	ENSG00000286210	CM	up
9.17332	2.18948	0.680884	3.21565	0.00130149	0.0494907	ENSG00000282097	CM	up
47.298	3.87422	0.624032	6.20837	5.35368e-10	1.85349e-06	ENSG00000289055	CM	up
40.117	-1.22944	0.349915	-3.51354	0.000442183	0.0252255	LINC01341	CM	down
2.19607	4.41344	1.30689	3.37706	0.000732648	0.034205	ENSG00000235403	CM	up
498.518	1.67708	0.373717	4.48755	7.20456e-06	0.00158851	ID2	CM	up
74.6046	1.26988	0.361718	3.51069	0.000446945	0.0252736	GRHL1	CM	up
337.094	-1.23449	0.306479	-4.02798	5.62575e-05	0.00653135	KCNS3	CM	down
28.0483	1.59277	0.480442	3.31523	0.000915674	0.039488	ENSG00000290108	CM	up
42.9872	3.48144	0.970974	3.58552	0.000336411	0.0213856	ENSG00000228950	CM	up
14.4379	1.86704	0.468825	3.98238	6.82279e-05	0.00757028	LINC01460	CM	up
205.667	1.67827	0.365039	4.59751	4.27576e-06	0.00113546	FOSL2-AS1	CM	up
358.927	1.46521	0.322503	4.54324	5.53973e-06	0.0013335	ENSG00000270640	CM	up
15.9882	1.82335	0.524833	3.47416	0.000512464	0.027385	ENSG00000287255	CM	up
753.009	1.37753	0.288611	4.77295	1.81546e-06	0.000652633	EPAS1	CM	up
7.83856	1.86927	0.518574	3.60464	0.000312583	0.0207515	ENSG00000289855	CM	up
1450.81	1.2766	0.355094	3.59509	0.000324275	0.020905	PELI1	CM	up
4.57773	3.34919	0.82277	4.07062	4.68877e-05	0.00580301	LINC00309	CM	up
62.7676	-1.50001	0.430578	-3.4837	0.000494526	0.0267343	ARHGAP25	CM	down
2213.38	1.08931	0.264923	4.11181	3.92565e-05	0.00517594	MXD1	CM	up
69.9836	3.34877	0.927797	3.60938	0.000306931	0.0206824	SH2D6	CM	up
7559.38	1.53393	0.398216	3.85201	0.000117151	0.0109779	MAT2A	CM	up
11.4749	-1.80171	0.476915	-3.77784	0.000158196	0.0135104	SMYD1	CM	down
31.255	1.38106	0.385538	3.58216	0.000340771	0.0214932	EIF2AK3-DT	CM	up
53.3759	3.20031	0.523279	6.11588	9.60278e-10	2.29053e-06	ENSG00000235480	CM	up
3.06351	2.95249	0.788221	3.74577	0.000179843	0.0147001	ENSG00000286101	CM	up
5.64381	3.32176	0.997637	3.32963	0.00086962	0.0384126	ENSG00000287771	CM	up
30.6186	2.20449	0.56981	3.86883	0.000109361	0.0104342	IL1RL1	CM	up
724.508	1.53802	0.396254	3.88141	0.000103852	0.0100548	LINC01965	CM	up
22.4826	-2.72395	0.594333	-4.5832	4.57909e-06	0.00118957	EDAR	CM	down
13.5179	-1.46475	0.451833	-3.24179	0.00118781	0.0464467	ENSG00000290732	CM	down
11.6035	2.34198	0.566575	4.13357	3.57171e-05	0.00480588	ENSG00000289202	CM	up
8.3462	-1.84271	0.519557	-3.5467	0.000390091	0.0235292	ENSG00000238207	CM	down
420.626	1.77358	0.484925	3.65743	0.00025476	0.0183207	CLASP1-AS1	CM	up
14.865	1.5801	0.465857	3.39182	0.000694296	0.0333643	ENSG00000286400	CM	up
96.8168	-1.56845	0.416172	-3.76877	0.000164055	0.0138407	LYPD6	CM	down
20.2026	1.15132	0.339686	3.38936	0.00070057	0.033543	TNFAIP6	CM	up
66.7227	1.11717	0.253194	4.41231	1.02273e-05	0.00208018	CFAP210	CM	up
9.59665	-1.62296	0.394016	-4.11903	3.80464e-05	0.00506732	ENSG00000286115	CM	down
13.8406	2.35895	0.589826	3.99941	6.35007e-05	0.0071816	ENSG00000288900	CM	up
1015.18	1.49835	0.377565	3.96846	7.2338e-05	0.00781072	HSPE1	CM	up
4299.66	-1.20306	0.359193	-3.34934	0.000810049	0.0363966	C2CD6	CM	down
112.067	1.1979	0.356798	3.35736	0.000786905	0.0359784	MYOSLID	CM	up
71.4656	-1.22599	0.378131	-3.24225	0.00118591	0.0464418	ENSG00000226276	CM	down
17.7019	1.54302	0.352502	4.37733	1.20142e-05	0.00237014	ENSG00000288819	CM	up
4.54755	-2.86582	0.74456	-3.84901	0.000118596	0.0110562	ENSG00000261096	CM	down
420.788	-1.10738	0.246587	-4.49083	7.09448e-06	0.0015775	COPS8-DT	CM	down
304.655	1.41828	0.403113	3.51832	0.000434294	0.025044	ERFE	CM	up
28.1328	-1.07179	0.333652	-3.21229	0.00131681	0.0496934	ENSG00000269982	CM	down
26.4075	-1.51345	0.419885	-3.60443	0.00031284	0.0207515	SLC6A1	CM	down
238.883	1.15717	0.33064	3.49978	0.000465648	0.0259951	PPARG	CM	up
14.3496	1.59394	0.400659	3.97829	6.94115e-05	0.00765218	ENSG00000290072	CM	up
290.37	1.49428	0.456517	3.27322	0.00106331	0.0431257	CSRNP1	CM	up
8.45252	2.98015	0.641211	4.64768	3.35689e-06	0.000967891	ENSG00000283849	CM	up
27.3268	1.94137	0.535526	3.62516	0.000288787	0.0198876	ENSG00000287620	CM	up
11.3218	2.01695	0.388827	5.18727	2.134e-07	0.000136566	CDCP1	CM	up
98.7568	-1.08989	0.300152	-3.63112	0.000282194	0.0195878	SLC6A20	CM	down
10.372	-1.46645	0.404702	-3.62353	0.000290614	0.019961	LINC00870	CM	down
75.8094	-1.11149	0.289349	-3.84136	0.000122355	0.0111647	ENSG00000239462	CM	down
22.4213	1.02121	0.295696	3.45358	0.000553205	0.0286552	ENSG00000286735	CM	up
129.17	-1.62898	0.43774	-3.72133	0.000198173	0.0156146	FBXO40	CM	down
25.0307	-1.82097	0.420403	-4.33149	1.48106e-05	0.00272016	CFAP100	CM	down
1535.36	-1.20153	0.229959	-5.22494	1.74207e-07	0.000123536	KBTBD12	CM	down
35.3697	1.52894	0.438427	3.48733	0.000487877	0.0266242	ACAD9-DT	CM	up
432.751	-1.58808	0.388505	-4.08766	4.35755e-05	0.00560457	KY	CM	down
44.5898	-1.57357	0.323655	-4.86188	1.16276e-06	0.00046225	ENSG00000240086	CM	down
7.40344	1.9381	0.526641	3.68011	0.000233129	0.0174269	STAG1-DT	CM	up
1431.6	1.06225	0.31291	3.39476	0.000686877	0.0330684	ATP1B3	CM	up
4891.78	1.15231	0.23648	4.87275	1.10056e-06	0.000451197	MED12L	CM	up
6.1376	1.92703	0.589906	3.26668	0.00108818	0.0437237	GPR87	CM	up
1518.51	2.27566	0.437054	5.20683	1.92096e-07	0.000129236	RARRES1	CM	up
5.72817	2.49592	0.588848	4.23865	2.24868e-05	0.00349117	ENSG00000244706	CM	up
87.7787	1.01014	0.29559	3.41736	0.000632311	0.0314812	ENSG00000286994	CM	up
46.2092	-1.06994	0.330285	-3.23946	0.00119757	0.0467492	TTC14-DT	CM	down
10.9609	2.08842	0.606848	3.44142	0.000578664	0.0295389	ATP11B-DT	CM	up
507.587	1.08676	0.216504	5.01956	5.17889e-07	0.000247061	DNAJB11	CM	up
24.7767	1.76646	0.511265	3.45507	0.000550156	0.0285841	ENSG00000263826	CM	up
125.599	2.15531	0.378697	5.69139	1.2601e-08	1.50285e-05	ENSG00000285938	CM	up
186.236	1.26513	0.315334	4.01202	6.02006e-05	0.00689677	ENSG00000290021	CM	up
316.031	1.91498	0.410255	4.66777	3.04491e-06	0.000918303	ENSG00000289331	CM	up
25.1991	2.2627	0.494135	4.57912	4.66935e-06	0.00120112	ENSG00000289865	CM	up
21.7253	-1.73649	0.449815	-3.86047	0.000113171	0.010643	LINC01182	CM	down
4.88364	2.12546	0.578093	3.67667	0.0002363	0.0174918	ENSG00000288321	CM	up
19.1226	1.89117	0.385726	4.90288	9.44405e-07	0.000406218	LINC02265	CM	up
426.569	-1.24255	0.329565	-3.77027	0.000163071	0.0138021	IGFBP7-AS1	CM	down
117.243	1.17332	0.337175	3.47985	0.000501702	0.0270301	STBD1	CM	up
8.06632	2.25963	0.652515	3.46296	0.00053427	0.0280926	BMP2K-DT	CM	up
30.8499	-1.00843	0.300542	-3.35537	0.000792596	0.0360461	C4orf36	CM	down
625.944	1.77872	0.536716	3.31408	0.000919449	0.039488	SPP1	CM	up
19.0809	1.5068	0.424205	3.55206	0.000382223	0.0233383	TSPAN5-DT	CM	up
7.84589	4.00264	0.843536	4.74507	2.08439e-06	0.000729202	C4orf54	CM	up
266.429	1.66896	0.398239	4.19084	2.77918e-05	0.00407554	CFI	CM	up
7.06407	4.09629	0.922029	4.4427	8.88385e-06	0.00186476	ENSG00000286700	CM	up
14.2306	-1.32891	0.409756	-3.24317	0.00118209	0.0464306	ENSG00000261668	CM	down
243.196	1.15537	0.327327	3.52971	0.000416013	0.0244695	PCDH10	CM	up
33.119	1.6702	0.513019	3.25562	0.00113146	0.0450112	LINC02432	CM	up
93.1403	-1.16475	0.321672	-3.62091	0.00029357	0.0200248	TMEM144	CM	down
13.5608	-1.3986	0.427993	-3.26782	0.0010838	0.0437237	ENSG00000248431	CM	down
32.2419	1.63779	0.380944	4.2993	1.71337e-05	0.00295759	SPATA4	CM	up
13.1489	2.726	0.789889	3.45112	0.000558255	0.0287948	ENSG00000290012	CM	up
140.717	-1.32398	0.310026	-4.27055	1.94987e-05	0.00321766	LINC02427	CM	down
15.8711	1.85704	0.515253	3.60413	0.000313195	0.0207515	ENSG00000248968	CM	up
509.546	-1.23537	0.333758	-3.70139	0.00021442	0.0164984	ENSG00000253766	CM	down
39.0641	1.93541	0.545797	3.54602	0.000391092	0.0235355	LINC00603	CM	up
47.5131	1.30601	0.376466	3.46912	0.000522166	0.027734	PTGER4	CM	up
7.29079	2.70824	0.755467	3.58485	0.00033727	0.0213856	ESM1	CM	up
210.975	1.48664	0.379885	3.91339	9.10084e-05	0.00901086	ENSG00000249236	CM	up
2.70506	3.97613	0.925767	4.29496	1.74724e-05	0.002969	ENSG00000225230	CM	up
483.159	-1.63665	0.433016	-3.77966	0.000157045	0.0134658	RMEL3	CM	down
117.48	-1.72993	0.497316	-3.47853	0.00050418	0.0270525	LNCBRM	CM	down
52.4873	-1.67054	0.514274	-3.24835	0.00116078	0.0457306	ENSG00000287709	CM	down
942.491	-1.51961	0.436807	-3.47891	0.000503449	0.0270525	C5orf64	CM	down
3.7137	3.25809	0.934296	3.48721	0.000488081	0.0266242	ENSG00000247372	CM	up
8.87035	1.93505	0.563333	3.435	0.000592555	0.0299566	ENSG00000289317	CM	up
5.08363	2.87428	0.645929	4.44984	8.59363e-06	0.00184819	RGMB-AS1	CM	up
18.7718	3.00284	0.832135	3.6086	0.000307857	0.0206824	MGC32805	CM	up
5.35094	2.28749	0.660045	3.46566	0.000528932	0.0279039	ENSG00000289267	CM	up
294.657	-1.09593	0.32129	-3.41102	0.000647212	0.0318499	ENSG00000254363	CM	down
34.8004	-1.467	0.430734	-3.4058	0.000659697	0.032233	DND1	CM	down
3.13972	2.64678	0.702939	3.76531	0.000166342	0.013944	ENSG00000288892	CM	up
24.4639	1.53435	0.421596	3.63938	0.000273297	0.0192494	IL17B	CM	up
114.218	-1.35284	0.383625	-3.52646	0.000421155	0.0244918	CAMK2A	CM	down
408.273	1.31197	0.361651	3.62772	0.00028594	0.0197434	GPX3	CM	up
29.5766	-1.19528	0.33905	-3.52539	0.000422853	0.0244918	ENSG00000253256	CM	down
153.42	-1.25854	0.299526	-4.20177	2.6484e-05	0.00394822	CCNJL	CM	down
99.2405	-1.13659	0.320195	-3.54968	0.000385694	0.0234255	C1QTNF2	CM	down
4.65251	2.13562	0.664511	3.21382	0.00130984	0.0496934	GABRG2	CM	up
10.2736	-1.62072	0.374323	-4.32974	1.49288e-05	0.00272016	KCNIP1-OT1	CM	down
301.895	2.28811	0.506334	4.51898	6.21368e-06	0.00144278	ENSG00000253736	CM	up
2736.05	1.53152	0.369837	4.14107	3.45689e-05	0.00472405	DUSP1	CM	up
5.42717	2.42181	0.596932	4.05709	4.96885e-05	0.00600796	ENSG00000287003	CM	up
49.5974	1.13519	0.342538	3.31405	0.00091955	0.039488	ENSG00000229896	CM	up
5.07192	2.90402	0.839632	3.45868	0.000542835	0.0283159	JARID2-AS1	CM	up
100.624	1.58692	0.378673	4.19074	2.7804e-05	0.00407554	ATXN1-AS1	CM	up
5.15596	1.76784	0.519694	3.40169	0.000669714	0.032601	ENSG00000272558	CM	up
27.3462	2.88875	0.667993	4.32453	1.5286e-05	0.00276603	H3C1	CM	up
9.59013	2.33308	0.620933	3.75738	0.000171699	0.0142564	H4C1	CM	up
46.3388	-1.18779	0.275061	-4.31828	1.57248e-05	0.00280672	HFE	CM	down
14.7361	2.18709	0.448391	4.87765	1.07357e-06	0.000447114	ENSG00000289117	CM	up
24.0421	1.54178	0.450816	3.41999	0.000626234	0.0312379	ENSG00000289467	CM	up
40.0366	1.43411	0.310961	4.61185	3.99093e-06	0.0010833	IER3-AS1	CM	up
20.2746	-1.25913	0.309142	-4.07298	4.64152e-05	0.00577754	TCF19	CM	down
2.67025	2.83177	0.847892	3.33978	0.000838446	0.0374135	TNF	CM	up
2487.47	2.6798	0.466351	5.74632	9.12063e-09	1.25951e-05	HSPA1A	CM	up
18.9674	2.32561	0.633012	3.67388	0.000238897	0.0174918	ENSG00000289829	CM	up
1786.98	2.22633	0.402163	5.53589	3.0966e-08	3.0092e-05	HSPA1B	CM	up
468.952	1.21856	0.238042	5.11907	3.07047e-07	0.000171411	PIM1	CM	up
11.9561	2.47743	0.61977	3.99733	6.40597e-05	0.00721373	TREM1	CM	up
1877.45	-2.06508	0.610525	-3.38246	0.000718394	0.0339015	ENSG00000286417	CM	down
16.5898	-1.39092	0.352604	-3.94472	7.98932e-05	0.00815657	ENSG00000271857	CM	down
2013.89	1.0887	0.262309	4.15046	3.3181e-05	0.00459796	BAG2	CM	up
65.8017	1.42433	0.370825	3.84097	0.000122549	0.0111647	ENSG00000289911	CM	up
34.9718	2.01523	0.367589	5.48228	4.19878e-08	3.79888e-05	PTP4A1	CM	up
47.8605	1.09805	0.333233	3.29513	0.00098376	0.0411815	ENSG00000272008	CM	up
7.39734	2.28045	0.53539	4.25942	2.04957e-05	0.00330786	PNRC1-DT	CM	up
8079.87	1.39387	0.417767	3.33647	0.000848488	0.0376058	PNRC1	CM	up
28.7775	1.00998	0.278388	3.62794	0.000285693	0.0197434	PRDM1	CM	up
9.68159	-2.36552	0.512745	-4.61344	3.96068e-06	0.0010833	CCN6	CM	down
5.48783	-1.96534	0.607481	-3.23523	0.00121547	0.0471766	ENSG00000226409	CM	down
63.1492	-1.31119	0.316628	-4.14112	3.45616e-05	0.00472405	ENPP3	CM	down
145.6	1.85346	0.393673	4.70813	2.50001e-06	0.000819939	ENSG00000289312	CM	up
149.901	-1.13956	0.334124	-3.41059	0.000648215	0.0318499	WAKMAR2	CM	down
182.999	-1.16513	0.352337	-3.30687	0.000943451	0.0401855	ENSG00000231329	CM	down
1099.73	1.03829	0.26467	3.92295	8.74715e-05	0.00875984	AKAP12	CM	up
582.49	-1.16061	0.335255	-3.46188	0.000536423	0.0280932	THSD7A	CM	down
12.6111	-1.4286	0.349796	-4.08408	4.42517e-05	0.00561912	ENSG00000223838	CM	down
4.21187	3.23828	0.872222	3.71267	0.000205082	0.01592	ENSG00000288962	CM	up
447.853	1.70474	0.473813	3.59792	0.000320776	0.020905	CREB5	CM	up
528.374	1.47203	0.44315	3.32174	0.000894583	0.0391854	INHBA	CM	up
26.7689	-1.17871	0.279441	-4.2181	2.46364e-05	0.003715	ENSG00000290758	CM	down
9.61885	1.90189	0.53546	3.55189	0.000382478	0.0233383	H2AZ2-DT	CM	up
174.26	1.0632	0.289349	3.67447	0.000238347	0.0174918	SNHG15	CM	up
11.0685	-1.60681	0.428136	-3.75304	0.000174705	0.0144148	ENSG00000289108	CM	down
16287.1	2.27276	0.486645	4.67026	3.0082e-06	0.000917781	HSPB1	CM	up
4.12213	2.17651	0.676273	3.21839	0.00128913	0.049163	ENSG00000232667	CM	up
145.867	1.66108	0.435785	3.81169	0.000138019	0.0122567	HGF	CM	up
115.778	1.96404	0.575116	3.41503	0.000637753	0.0315129	TAC1	CM	up
800.494	-1.21396	0.258197	-4.70169	2.58019e-06	0.000835789	LRRC17	CM	down
41.1019	2.62638	0.341519	7.6903	1.46791e-14	3.85151e-10	ENSG00000273320	CM	up
2891.06	1.05842	0.19097	5.5423	2.98526e-08	3.0092e-05	IFRD1	CM	up
3.62151	5.14882	1.10187	4.67281	2.971e-06	0.000917781	ENSG00000289630	CM	up
5.66215	3.33034	0.834371	3.99144	6.56743e-05	0.00736394	SND1-DT	CM	up
483.461	-1.29591	0.400288	-3.23745	0.00120601	0.0469487	COPG2IT1	CM	down
26.053	2.04238	0.501475	4.07275	4.64617e-05	0.00577754	ENSG00000273391	CM	up
98.0339	-1.28637	0.255168	-5.04126	4.62481e-07	0.000228954	AGK-DT	CM	down
56.6575	-1.50296	0.365499	-4.11209	3.92095e-05	0.00517594	ASB10	CM	down
10.3139	3.13476	0.687473	4.55983	5.11939e-06	0.00126895	ENSG00000290095	CM	up
35.1693	1.94688	0.552034	3.52675	0.000420699	0.0244918	INSIG1-DT	CM	up
51.227	1.26581	0.331043	3.82371	0.000131458	0.0118123	LINC00689	CM	up
187.01	1.43368	0.303808	4.71905	2.36951e-06	0.000804746	SLC7A2	CM	up
83.3829	2.32904	0.430572	5.40916	6.332e-08	5.53796e-05	PHYHIP	CM	up
1973.49	-1.14546	0.27133	-4.22165	2.42524e-05	0.00370621	PEBP4	CM	down
18.7539	-1.13721	0.323589	-3.51438	0.000440786	0.0252255	ENSG00000253142	CM	down
7.5717	2.45444	0.665783	3.68654	0.000227323	0.0172228	LINC00589	CM	up
321.125	1.1552	0.295601	3.90798	9.30709e-05	0.00918043	RBPMS-AS1	CM	up
194.178	1.74837	0.51825	3.3736	0.000741913	0.0343928	ENSG00000285971	CM	up
1228.37	1.96212	0.447306	4.38653	1.15176e-05	0.00230413	NKAIN3	CM	up
14.986	3.47029	0.566959	6.12089	9.30538e-10	2.29053e-06	ENSG00000286113	CM	up
46.6386	-2.47024	0.657968	-3.75435	0.00017379	0.0143845	CASC9	CM	down
44.9728	1.82908	0.516933	3.53833	0.000402672	0.0239576	COLEC10	CM	up
23.1271	1.28866	0.345538	3.72945	0.000191901	0.0153181	ANXA13	CM	up
34.8579	1.26156	0.311423	4.05096	5.10081e-05	0.00613922	TRIB1	CM	up
671.064	-1.19009	0.300663	-3.95822	7.55099e-05	0.00795674	PCAT1	CM	down
107.327	1.56417	0.420928	3.71601	0.000202392	0.0157883	MYC	CM	up
5.88628	2.99537	0.762137	3.93022	8.48678e-05	0.00859753	ENSG00000286034	CM	up
1391.23	1.1623	0.316087	3.67715	0.000235852	0.0174918	KHDRBS3	CM	up
801.713	-1.96671	0.507752	-3.87337	0.000107339	0.0103163	LINC02055	CM	down
92.1034	-1.0042	0.297561	-3.37476	0.000738788	0.0343085	LYNX1	CM	down
23.3377	-1.62288	0.483671	-3.35534	0.000792689	0.0360461	ENSG00000254812	CM	down
15.5798	-1.37906	0.311629	-4.42532	9.62986e-06	0.00198951	PGM5P3-AS1	CM	down
366.482	2.15489	0.400864	5.3756	7.63267e-08	6.25832e-05	SLC1A1	CM	up
8.195	-2.37339	0.557287	-4.25883	2.05496e-05	0.00330786	CER1	CM	down
4715.51	-1.12705	0.313464	-3.59546	0.000323822	0.020905	FREM1	CM	down
9.14226	2.60832	0.656693	3.97189	7.13042e-05	0.00776298	FOCAD-AS1	CM	up
371.875	-1.27772	0.295649	-4.32176	1.54793e-05	0.00278182	LINC01239	CM	down
3.49762	2.15621	0.656781	3.28299	0.00102713	0.0421719	DNAJB5-DT	CM	up
31.6602	-1.12748	0.308281	-3.65732	0.000254861	0.0183207	GAS1RR	CM	down
1525.48	1.3586	0.364535	3.72693	0.000193826	0.0153181	S1PR3	CM	up
20.3303	1.88906	0.559644	3.37548	0.000736883	0.0342807	CKS2	CM	up
55.7356	2.89761	0.467368	6.19986	5.65131e-10	1.85349e-06	ENSG00000289123	CM	up
2.08026	2.96421	0.903958	3.27915	0.0010412	0.0426194	ENSG00000288023	CM	up
2137.86	-1.44322	0.360735	-4.00077	6.31374e-05	0.00717143	ERCC6L2-AS1	CM	down
67.1078	1.80947	0.36011	5.02475	5.04079e-07	0.000244926	ENSG00000287070	CM	up
267.532	1.84547	0.359346	5.13562	2.81211e-07	0.000170423	KLF4	CM	up
20.8482	1.15015	0.31203	3.68604	0.000227773	0.0172228	ENSG00000235119	CM	up
111.548	-1.51313	0.422105	-3.58472	0.000337436	0.0213856	GGTA1	CM	down
3029.04	2.38206	0.549199	4.33734	1.44217e-05	0.00268367	HSPA5	CM	up
20.2978	1.818	0.416482	4.36514	1.27044e-05	0.00243312	HSPA5-DT	CM	up
7.99756	2.29919	0.606261	3.79241	0.000149192	0.0129746	ENSG00000230536	CM	up
206.278	1.41301	0.365718	3.86367	0.000111698	0.0105422	IER5L	CM	up
24.1635	1.7268	0.423574	4.07675	4.56697e-05	0.0057334	ENSG00000227619	CM	up
8.78181	-1.99327	0.456429	-4.3671	1.25905e-05	0.00243312	ENSG00000273473	CM	down
500.855	1.32204	0.394719	3.34932	0.000810108	0.0363966	IDI1	CM	up
1796.18	1.47003	0.349022	4.21184	2.53298e-05	0.00379773	KLF6	CM	up
741.987	4.3356	0.623409	6.95466	3.53408e-12	4.63635e-08	ENSG00000288755	CM	up
29.0144	1.21337	0.345367	3.51327	0.000442635	0.0252255	IL15RA	CM	up
449.926	-1.56543	0.426959	-3.66647	0.000245921	0.0178739	ITIH5	CM	down
18.4788	2.46264	0.555975	4.4294	9.44958e-06	0.00196776	ENSG00000272366	CM	up
120.434	1.59785	0.367727	4.34521	1.39139e-05	0.00260767	MPP7-DT	CM	up
19.6395	2.70118	0.682097	3.96011	7.49162e-05	0.00795575	ENSG00000289616	CM	up
238.919	1.23126	0.248888	4.94706	7.53438e-07	0.00034682	ITGB1-DT	CM	up
306.647	-1.01034	0.254673	-3.96719	7.27245e-05	0.00782027	TMEM72-AS1	CM	down
881.733	1.69309	0.459972	3.68085	0.000232456	0.0174262	DEPP1	CM	up
909.863	-1.39972	0.383834	-3.64669	0.000265642	0.0188887	LINC01515	CM	down
12.2329	-2.14596	0.543468	-3.94865	7.85939e-05	0.00811869	ENSG00000285871	CM	down
225.467	1.20711	0.321865	3.75036	0.000176581	0.014524	SRGN	CM	up
156.568	-1.22798	0.311098	-3.94725	7.90556e-05	0.00813436	ENSG00000270087	CM	down
276.022	1.5631	0.367865	4.2491	2.14629e-05	0.00339243	PAPSS2	CM	up
19.0382	1.69425	0.49369	3.4318	0.000599582	0.0302535	CH25H	CM	up
35.627	1.96794	0.60973	3.22756	0.0012485	0.0481651	ENSG00000232110	CM	up
42.7269	-1.30086	0.367946	-3.53547	0.000407055	0.0240548	ENSG00000288526	CM	down
14.2567	1.77486	0.491043	3.61446	0.000300969	0.0203526	SLC25A28-DT	CM	up
536.608	1.37519	0.258096	5.32821	9.91847e-08	7.88608e-05	ITPRIP	CM	up
80.0893	-1.24993	0.327399	-3.81776	0.000134667	0.0120593	SORCS3	CM	down
43.7189	1.15732	0.327986	3.52857	0.000417804	0.0244695	GFRA1	CM	up
3.83205	3.69113	1.05617	3.49482	0.000474377	0.0262313	ENSG00000263041	CM	up
666.043	1.21864	0.267845	4.54979	5.37e-06	0.00130461	BAG3	CM	up
800.151	1.08643	0.280303	3.87591	0.000106229	0.0102472	OAT	CM	up
214.447	-1.47471	0.425343	-3.46711	0.000526084	0.0278294	ADAM12	CM	down
3113.6	1.41944	0.431655	3.28836	0.00100773	0.0418368	IFITM3	CM	up
485.147	1.09104	0.307604	3.54688	0.000389819	0.0235292	DUSP8	CM	up
240.954	-1.75761	0.496456	-3.54032	0.000399635	0.0238852	SLC22A18	CM	down
18.6149	1.069	0.302236	3.53698	0.00040473	0.0240054	ENSG00000289468	CM	up
4.01278	3.24986	0.948028	3.42802	0.000607992	0.0305019	ENSG00000254662	CM	up
8.257	1.71238	0.526296	3.25364	0.00113937	0.0450222	MYRF-AS1	CM	up
248.528	1.34197	0.348697	3.84853	0.00011883	0.0110562	CSKMT	CM	up
102.733	2.43523	0.463444	5.25463	1.48326e-07	0.000111193	ENSG00000290057	CM	up
19.9784	2.23138	0.492413	4.53152	5.8562e-06	0.00138428	ENSG00000289259	CM	up
18.4278	2.19062	0.537051	4.07898	4.52346e-05	0.00570608	ENSG00000289883	CM	up
29.5775	3.15103	0.550804	5.72078	1.06033e-08	1.3409e-05	ENSG00000286756	CM	up
2.91787	2.44941	0.738221	3.31798	0.000906699	0.0394778	ENSG00000290061	CM	up
10.5784	2.12163	0.498701	4.25432	2.09689e-05	0.00335477	FOSL1	CM	up
193.648	-1.55638	0.390868	-3.98185	6.838e-05	0.00757028	SHANK2	CM	down
9.23882	1.63655	0.48846	3.35044	0.000806846	0.0363966	CHRDL2	CM	up
127.782	-1.11929	0.340029	-3.29174	0.000995685	0.0414679	PIWIL4-AS1	CM	down
20.5518	-1.93811	0.476716	-4.06555	4.79195e-05	0.00587529	ENSG00000289232	CM	down
695.724	2.0368	0.504205	4.03963	5.35366e-05	0.00633668	SLN	CM	up
4446.35	1.68057	0.424055	3.96309	7.39864e-05	0.00789128	CRYAB	CM	up
51.2654	-1.00219	0.271038	-3.6976	0.000217647	0.016649	FXYD6	CM	down
10.1106	-1.30712	0.403117	-3.24253	0.00118475	0.0464418	SCN2B	CM	down
1596.25	-1.08239	0.264765	-4.08813	4.34859e-05	0.00560457	USP2-AS1	CM	down
7.10516	2.97222	0.736996	4.03289	5.50952e-05	0.00642484	ENSG00000290063	CM	up
105.85	1.46902	0.353016	4.16135	3.16372e-05	0.00446289	CLEC2B	CM	up
4053.55	1.52242	0.263807	5.77098	7.88106e-09	1.1488e-05	GABARAPL1	CM	up
19.7719	3.31273	0.586941	5.64406	1.66089e-08	1.81577e-05	ENSG00000256658	CM	up
178.364	-1.15486	0.311578	-3.70648	0.000210157	0.0162658	PLBD1-AS1	CM	down
8.45354	2.68818	0.563539	4.77018	1.84064e-06	0.000652633	ETNK1-DT	CM	up
175.803	1.53143	0.404821	3.78297	0.000154967	0.0133337	ENSG00000278743	CM	up
34.2327	3.31806	0.54178	6.12437	9.10434e-10	2.29053e-06	ENSG00000289928	CM	up
11.0412	1.33397	0.413044	3.22961	0.00123958	0.0479	BMAL2-AS1	CM	up
48.2873	-1.44453	0.321065	-4.49918	6.82174e-06	0.00154293	ENSG00000257042	CM	down
5.56879	1.83743	0.512241	3.58704	0.000334456	0.0213515	ENSG00000258232	CM	up
43.1182	1.58961	0.390691	4.06872	4.72725e-05	0.00582318	ENSG00000289854	CM	up
1084.49	1.61789	0.394447	4.10167	4.10187e-05	0.00535447	KCNMB4	CM	up
4.91141	2.27236	0.648249	3.50538	0.000455958	0.0255629	ENSG00000286259	CM	up
18.9399	1.74702	0.454373	3.8449	0.000120604	0.0111032	ENSG00000289384	CM	up
595.556	1.00281	0.27279	3.67613	0.000236802	0.0174918	BTG1-DT	CM	up
13109.4	1.11392	0.309729	3.59643	0.00032261	0.020905	NUDT4	CM	up
12.294	1.54701	0.400304	3.86459	0.000111278	0.0105405	ENSG00000257878	CM	up
251.425	-1.41617	0.404982	-3.49687	0.000470745	0.0261683	RMST	CM	down
1453.84	1.43275	0.306644	4.67236	2.97755e-06	0.000917781	HSPB8	CM	up
16.9063	2.80895	0.508931	5.51932	3.40314e-08	3.18899e-05	ENSG00000256884	CM	up
11.5967	1.98274	0.453745	4.36972	1.24408e-05	0.00243312	ENSG00000256609	CM	up
32.4301	1.71707	0.49071	3.49915	0.000466748	0.0260011	BICDL1	CM	up
160.686	-1.31437	0.301573	-4.35837	1.31033e-05	0.00249133	P2RX7	CM	down
10.194	-1.93349	0.541776	-3.5688	0.000358616	0.0221919	ENSG00000256204	CM	down
785.989	-1.39059	0.421423	-3.29975	0.000967697	0.0407746	LINC00621	CM	down
65.43	-1.98158	0.54764	-3.6184	0.00029643	0.0201496	ENSG00000289217	CM	down
59.839	-1.44712	0.382306	-3.78523	0.000153566	0.0132979	ENSG00000291041	CM	down
993.299	1.71886	0.400906	4.28744	1.80748e-05	0.00304004	HSPH1	CM	up
61.1916	1.36623	0.422139	3.23644	0.00121031	0.0470462	SMIM2	CM	up
85.2814	-1.33253	0.344328	-3.86993	0.000108866	0.0104249	LINC00407	CM	down
3.72817	2.08364	0.603372	3.45333	0.000553708	0.0286552	ENSG00000278462	CM	up
33.8403	2.43262	0.472723	5.14597	2.66142e-07	0.000166263	ENSG00000288765	CM	up
20.2262	-1.33687	0.321722	-4.15535	3.24786e-05	0.00453283	METTL21EP	CM	down
9.57587	2.08332	0.536344	3.8843	0.000102626	0.00997293	ENSG00000287575	CM	up
98.5281	-1.2888	0.320438	-4.02199	5.77078e-05	0.00667021	ADPRHL1	CM	down
63.2029	1.73713	0.500186	3.47296	0.000514747	0.0274511	TMEM255B	CM	up
33.0949	2.29565	0.369008	6.22114	4.93544e-10	1.85349e-06	PNP	CM	up
45.2058	1.08403	0.328637	3.29856	0.000971825	0.0408634	ARHGAP5-AS1	CM	up
17.1437	1.26865	0.349324	3.63174	0.000281514	0.0195878	BAZ1A-AS1	CM	up
52.5079	2.71258	0.560395	4.84048	1.29529e-06	0.000499791	ENSG00000289866	CM	up
7.63325	-2.1285	0.558085	-3.81394	0.000136766	0.0122057	PTGDR	CM	down
235.664	1.12061	0.294028	3.81124	0.000138273	0.0122567	SAMD4A-AS1	CM	up
330.063	1.34109	0.417862	3.20941	0.00133006	0.0498543	ARG2	CM	up
115.569	1.70072	0.439758	3.8674	0.000110003	0.0104575	ENSG00000289340	CM	up
1956.49	2.23644	0.540683	4.13633	3.52902e-05	0.00479764	FOS	CM	up
10.123	2.67834	0.522543	5.12559	2.9661e-07	0.000171411	LINC01220	CM	up
16.0974	1.57247	0.353681	4.44602	8.74775e-06	0.00185099	ENSG00000289347	CM	up
11.9238	-2.13068	0.599285	-3.55536	0.000377462	0.0231398	ENSG00000258987	CM	down
715.302	2.21964	0.480684	4.61768	3.88063e-06	0.00108319	SERPINA3	CM	up
194.284	-1.51279	0.458396	-3.30018	0.000966245	0.0407746	LINC01550	CM	down
7.84632	-2.39454	0.696906	-3.43596	0.000590468	0.0299187	ENSG00000258931	CM	down
5108.26	-2.09132	0.473371	-4.41793	9.96521e-06	0.00204271	OCA2	CM	down
18.7616	-1.20421	0.35045	-3.43619	0.000589966	0.0299187	ENSG00000259326	CM	down
60.9406	1.62683	0.471757	3.44845	0.000563819	0.0289397	ENSG00000276533	CM	up
336.909	1.07936	0.31691	3.4059	0.000659465	0.032233	POLR2M	CM	up
3.75614	3.48282	1.08089	3.22218	0.0012722	0.048801	C2CD4A	CM	up
334.145	-1.05333	0.28261	-3.72716	0.00019365	0.0153181	IQCH-AS1	CM	down
6.43311	-1.72591	0.453268	-3.8077	0.000140266	0.0123916	ENSG00000285919	CM	down
11.0182	2.56979	0.595876	4.31263	1.61321e-05	0.00285996	ENSG00000261543	CM	up
3150.8	-1.05575	0.302938	-3.48504	0.000492057	0.02673	CEMIP	CM	down
75.2094	1.26213	0.363762	3.46965	0.000521143	0.027734	AP3B2	CM	up
11.9168	2.7428	0.598292	4.58439	4.55305e-06	0.00118957	ENSG00000289200	CM	up
42.5716	3.08341	0.457582	6.73848	1.60052e-11	1.39982e-07	ENSG00000288872	CM	up
236.546	-1.15719	0.25375	-4.56038	5.10618e-06	0.00126895	LINC02254	CM	down
51.4398	-1.07162	0.324131	-3.30612	0.000945965	0.0402273	ENSG00000259582	CM	down
1590.26	-1.15496	0.352855	-3.27318	0.00106343	0.0431257	LINC00923	CM	down
16.8676	1.55523	0.432942	3.59224	0.000327852	0.0210322	ENSG00000275092	CM	up
20.5161	2.00258	0.478725	4.18314	2.87508e-05	0.00416775	TXNDC11-AS1	CM	up
205.64	1.1291	0.3239	3.48596	0.000490368	0.0266935	ACSM3	CM	up
117.063	2.44609	0.478311	5.11401	3.15383e-07	0.000172396	SDR42E2	CM	up
51.2875	1.58563	0.354756	4.46964	7.83523e-06	0.00171317	ENSG00000260635	CM	up
2.01328	3.37969	0.925039	3.65357	0.000258621	0.0185402	ENSG00000274092	CM	up
9.20361	1.49988	0.446961	3.35573	0.000791549	0.0360461	CYLD-AS1	CM	up
1394.4	1.93524	0.542417	3.56781	0.000359983	0.022224	MT2A	CM	up
316.176	2.54183	0.611542	4.15643	3.23255e-05	0.00453283	MT1M	CM	up
76.1984	2.56761	0.636594	4.03335	5.49865e-05	0.00642484	MT1A	CM	up
588.704	2.19351	0.583758	3.75756	0.000171578	0.0142564	MT1X	CM	up
26.8105	-1.67038	0.425759	-3.9233	8.73446e-05	0.00875984	MMP15	CM	down
109.39	-3.93424	0.595477	-6.60688	3.92506e-11	2.57464e-07	ENSG00000261540	CM	down
19.9657	1.34078	0.358527	3.73969	0.00018425	0.0149533	CENPN	CM	up
13.571	2.44176	0.478716	5.10064	3.38515e-07	0.000177639	ENSG00000245059	CM	up
40.7791	-1.20839	0.25939	-4.65861	3.18351e-06	0.000936735	ENSG00000260495	CM	down
7.03813	2.48985	0.583432	4.26759	1.97598e-05	0.00324036	KCNG4	CM	up
26.2341	1.49044	0.404545	3.68425	0.000229379	0.0172944	CA5A	CM	up
15.0442	1.66667	0.369359	4.51232	6.41216e-06	0.00147581	TUBB3	CM	up
21.8105	-1.22045	0.318051	-3.83728	0.000124403	0.0112555	C17orf114	CM	down
228.6	1.92512	0.459766	4.18717	2.82455e-05	0.00411725	RASD1	CM	up
4.90744	3.00765	0.805172	3.73542	0.000187405	0.0151296	CSF3	CM	up
7.08596	2.43975	0.724799	3.3661	0.00076238	0.0351552	CCR7	CM	up
11.076	-3.52174	0.89735	-3.92459	8.68765e-05	0.00875984	ENSG00000285668	CM	down
1177.03	-1.97421	0.384642	-5.13258	2.85793e-07	0.000170423	ARL17B	CM	down
7.86051	1.57027	0.463637	3.38686	0.000706982	0.0336912	ENSG00000274213	CM	up
27.5938	1.62174	0.427656	3.79217	0.000149338	0.0129746	ENSG00000286732	CM	up
388.821	1.69974	0.512743	3.31499	0.000916467	0.039488	TEX14	CM	up
79.8424	2.14403	0.589762	3.63541	0.00027754	0.0193672	ENSG00000290039	CM	up
139.725	1.81456	0.421266	4.30741	1.65176e-05	0.00290866	ENSG00000273702	CM	up
128.143	-2.96774	0.610384	-4.86209	1.16152e-06	0.00046225	ENSG00000290457	CM	down
230.215	-2.26428	0.485754	-4.66136	3.1412e-06	0.000936579	MAP2K6	CM	down
39.8573	1.46571	0.41222	3.55564	0.000377058	0.0231398	C1QTNF1-AS1	CM	up
439.399	1.07571	0.294038	3.65842	0.000253775	0.0183207	EIF4A3	CM	up
26.1529	1.59052	0.403589	3.94094	8.11626e-05	0.00825405	ENSG00000287193	CM	up
1377.32	-1.39808	0.434116	-3.22052	0.0012796	0.0490133	ARHGAP28	CM	down
31.5107	1.59289	0.416451	3.82491	0.000130817	0.0117951	ENSG00000287509	CM	up
708.205	1.44622	0.294884	4.90438	9.37208e-07	0.000406218	CHMP1B	CM	up
3.70425	3.36255	1.01406	3.31593	0.00091338	0.039488	TTC39C-AS1	CM	up
511.895	-1.06749	0.27464	-3.88687	0.000101546	0.00990472	AQP4-AS1	CM	down
6.74855	-1.59809	0.465843	-3.43052	0.00060242	0.030318	ENSG00000263677	CM	down
27.8309	-1.76999	0.494758	-3.57749	0.000346914	0.0216207	ENSG00000264151	CM	down
3826.48	-1.45631	0.360537	-4.03928	5.36147e-05	0.00633668	FHOD3	CM	down
44.3919	-1.74168	0.452775	-3.84667	0.000119732	0.0111008	MRO	CM	down
2.88815	4.85636	1.0564	4.59709	4.28426e-06	0.00113546	MALT1-AS1	CM	up
694.744	-1.22092	0.295319	-4.13425	3.56121e-05	0.00480588	CCDC102B	CM	down
532.42	1.40019	0.402604	3.47784	0.000505465	0.0270661	ELANE	CM	up
4.23706	4.46297	1.10649	4.03344	5.49663e-05	0.00642484	KISS1R	CM	up
27.31	1.70539	0.383454	4.44744	8.69e-06	0.00185099	ENSG00000288704	CM	up
3277.97	2.29539	0.380063	6.0395	1.54591e-09	3.38014e-06	GADD45B	CM	up
89.5621	-1.11257	0.335973	-3.31148	0.000928049	0.0397681	CELF5	CM	down
100.597	2.35546	0.452288	5.20788	1.91007e-07	0.000129236	ENSG00000267262	CM	up
1525.18	1.88227	0.415019	4.53537	5.7502e-06	0.00137158	JUNB	CM	up
24.5631	-1.53151	0.436354	-3.50979	0.000448468	0.0253052	DAND5	CM	down
716.676	2.00124	0.465642	4.29781	1.72492e-05	0.00295807	IER2	CM	up
155.845	-1.21807	0.306866	-3.96938	7.20596e-05	0.00781072	ENSG00000267723	CM	down
11.8248	-1.05705	0.324125	-3.26123	0.0011093	0.044301	ENSG00000267379	CM	down
200.39	1.45265	0.404818	3.58841	0.000332702	0.0212913	KLF2-DT	CM	up
11.6818	1.99997	0.510555	3.91725	8.9565e-05	0.00893539	ENSG00000289333	CM	up
2611.19	1.64428	0.459526	3.57821	0.000345955	0.0216123	KLF2	CM	up
103.426	-1.64505	0.333809	-4.92812	8.30231e-07	0.000369213	CPAMD8	CM	down
93.8099	-1.38072	0.409989	-3.3677	0.000757978	0.0350755	PDE4C	CM	down
2475.93	1.37233	0.420764	3.26152	0.00110817	0.044301	JUND	CM	up
10.8601	-1.23376	0.352521	-3.49981	0.000465589	0.0259951	ENSG00000267934	CM	down
16.7825	1.69782	0.504373	3.3662	0.000762116	0.0351552	ENSG00000232680	CM	up
7.65209	1.98535	0.529496	3.7495	0.000177187	0.0145282	ENSG00000288919	CM	up
69.3924	1.20261	0.3632	3.31116	0.000929106	0.0397681	SERTAD1	CM	up
28.8117	2.08584	0.401373	5.19678	2.02774e-07	0.00013301	ENSG00000289115	CM	up
38.8152	2.85571	0.654097	4.36588	1.26614e-05	0.00243312	ENSG00000288773	CM	up
19.3245	-1.27252	0.292539	-4.34993	1.36182e-05	0.0025706	ENSG00000268401	CM	down
1703.57	-1.25776	0.317678	-3.95921	7.51973e-05	0.00795575	HIF3A	CM	down
621.516	1.61578	0.387226	4.1727	3.01007e-05	0.00426909	PPP1R15A	CM	up
10.4418	1.7034	0.468088	3.63905	0.000273651	0.0192494	RAD21L1	CM	up
11.9298	-1.29697	0.346863	-3.73914	0.000184651	0.0149533	FERMT1	CM	down
382.357	1.43955	0.339325	4.24239	2.21152e-05	0.00347451	SNAP25-AS1	CM	up
135.425	1.41871	0.369311	3.84149	0.00012229	0.0111647	FLRT3	CM	up
117.486	2.00303	0.391186	5.12039	3.04898e-07	0.000171411	NXT1	CM	up
3.35133	4.20838	0.85371	4.92952	8.24299e-07	0.000369213	ENSG00000286444	CM	up
330.14	1.75398	0.462163	3.79515	0.000147555	0.0129051	ID1	CM	up
88.9977	2.99925	0.516865	5.80277	6.5228e-09	1.06966e-05	ENSG00000289872	CM	up
32.8318	1.80278	0.396164	4.5506	5.34937e-06	0.00130461	ENSG00000275894	CM	up
11.4982	1.8073	0.499982	3.61473	0.000300664	0.0203526	ENSG00000231119	CM	up
2.52786	3.2767	0.945573	3.46531	0.000529619	0.0279039	ENSG00000289837	CM	up
23.8904	1.03649	0.309427	3.34971	0.000808973	0.0363966	ENSG00000289537	CM	up
3.98914	2.78612	0.769502	3.62068	0.000293831	0.0200248	LINC02970	CM	up
11.4165	1.54118	0.472642	3.26077	0.00111111	0.0443059	ENSG00000274333	CM	up
70.9246	1.59542	0.388683	4.10468	4.04866e-05	0.00531144	SAMSN1	CM	up
338.679	1.59701	0.270699	5.89959	3.64399e-09	6.82936e-06	ADAMTS1	CM	up
5.50777	3.59165	0.76148	4.71667	2.39735e-06	0.000804746	ENSG00000224649	CM	up
6914.05	1.87805	0.467744	4.01512	5.9415e-05	0.00683741	ETS2	CM	up
314.41	2.115	0.527296	4.01102	6.04565e-05	0.00689677	ENSG00000205622	CM	up
2.62555	4.1747	0.926601	4.5054	6.62494e-06	0.00151152	ENSG00000229925	CM	up
33.3825	1.10615	0.30408	3.6377	0.000275078	0.0192981	ITGB2	CM	up
7.38039	1.82955	0.551396	3.31803	0.000906532	0.0394778	ENSG00000275139	CM	up
37.1491	1.64373	0.338561	4.85505	1.20358e-06	0.000471338	ENSG00000286886	CM	up
15.1498	1.39689	0.334324	4.17826	2.93749e-05	0.00421169	SLC25A18	CM	up
10.6993	1.2478	0.369064	3.38098	0.000722269	0.033958	ASPHD2	CM	up
990.336	1.22045	0.334268	3.65111	0.000261107	0.0186167	XBP1	CM	up
11.2823	-1.09138	0.332904	-3.27837	0.00104409	0.0426712	LINC01521	CM	down
27.8548	-1.6379	0.458	-3.5762	0.000348619	0.0216294	SLC5A4-AS1	CM	down
131.587	2.92016	0.90586	3.22363	0.00126577	0.0486256	ENSG00000270022	CM	up
109.251	1.51434	0.429124	3.52891	0.000417277	0.0244695	LINC02939	CM	up
20.2604	2.08063	0.62071	3.35201	0.00080226	0.0363726	ENSG00000289044	CM	up
77.8634	-1.24887	0.291508	-4.28419	1.83405e-05	0.00306508	PLCXD1	CM	down
5.97795	3.44415	0.897027	3.83952	0.000123274	0.0111919	ENSG00000289237	CM	up
284.302	1.01792	0.218593	4.6567	3.21313e-06	0.000936735	KLHL15	CM	up
41.2717	1.62281	0.462095	3.51186	0.000444977	0.0252255	ARX	CM	up
193.018	-1.67555	0.472346	-3.54729	0.000389218	0.0235292	MAOB	CM	down
204.986	1.10954	0.288533	3.84546	0.000120328	0.0111032	GLA	CM	up
707.752	1.32377	0.409682	3.23122	0.00123262	0.0477013	HNRNPH2	CM	up
4.12989	4.06997	0.877051	4.64051	3.47548e-06	0.000980533	ENSG00000289365	CM	up
7.05742	-1.58822	0.467049	-3.40054	0.000672534	0.0326659	KIAA1210	CM	down
5.32164	2.65239	0.653139	4.061	4.88635e-05	0.00593556	ENSG00000289864	CM	up
1053.28	-1.4312	0.403778	-3.54452	0.000393328	0.0236159	ENSG00000273748	CM	down
26.6667	2.33404	0.527866	4.42165	9.79518e-06	0.00408528	ENSG00000285646	Macrophage	up
11.9368	-1.53029	0.348775	-4.38762	1.146e-05	0.00446789	EPS15-AS1	Macrophage	down
79.7513	-1.1301	0.217847	-5.18757	2.13053e-07	0.000233878	DAB1	Macrophage	down
49.9335	1.46791	0.345775	4.24528	2.18323e-05	0.00696544	DNAJB4	Macrophage	up
42.2614	1.57347	0.371256	4.23825	2.25268e-05	0.00696544	BCAS2	Macrophage	up
32.2164	1.99421	0.47255	4.22009	2.44202e-05	0.00724601	H3-7	Macrophage	up
13.2433	3.15421	0.729978	4.32097	1.55345e-05	0.00559788	ENSG00000287190	Macrophage	up
49.7897	1.75705	0.395321	4.44462	8.80485e-06	0.00385137	H2BC18	Macrophage	up
3.36281	3.66662	0.99774	3.67493	0.000237918	0.0323243	ENSG00000289589	Macrophage	up
72.2427	2.87596	0.536788	5.35772	8.42771e-08	0.000167936	IER5	Macrophage	up
2.16816	4.14998	1.07597	3.85695	0.000114809	0.0225085	ENSG00000289573	Macrophage	up
18.5816	1.57053	0.403182	3.89534	9.8061e-05	0.0202389	RGS16	Macrophage	up
5.39431	2.26879	0.627378	3.61631	0.000298838	0.0376596	ENSG00000288925	Macrophage	up
15.5626	-2.49806	0.417895	-5.97771	2.26299e-09	3.00482e-05	KCNH1	Macrophage	down
167.84	-1.64587	0.455283	-3.61505	0.000300286	0.0376596	ENSG00000287684	Macrophage	down
17.1086	2.85106	0.491905	5.79595	6.79342e-09	4.0611e-05	ENSG00000289341	Macrophage	up
35.233	2.4794	0.433292	5.72223	1.05135e-08	4.71371e-05	H2AC25	Macrophage	up
374.359	1.46752	0.408339	3.59389	0.000325781	0.0397452	ID2	Macrophage	up
212.812	1.80589	0.33871	5.33167	9.7314e-08	0.000174523	MXD1	Macrophage	up
3.70271	2.90794	0.746824	3.89375	9.87079e-05	0.0202389	ENSG00000235480	Macrophage	up
3.67329	3.73936	1.034	3.6164	0.00029873	0.0376596	ENSG00000287771	Macrophage	up
101.624	-1.17486	0.31356	-3.74685	0.000179066	0.026575	CACNB4	Macrophage	down
128.071	-1.83443	0.432391	-4.24253	2.21015e-05	0.00696544	TTN	Macrophage	down
15.7571	-2.02936	0.532343	-3.81213	0.000137776	0.023658	CCDC141	Macrophage	down
8.26468	2.13977	0.50783	4.21355	2.51386e-05	0.00727154	ENSG00000288900	Macrophage	up
129.489	1.79582	0.371548	4.83336	1.34251e-06	0.000891724	HSPE1	Macrophage	up
139.472	1.10792	0.307972	3.59748	0.000321311	0.0394684	ARL4C	Macrophage	up
7.96131	-2.47649	0.70036	-3.53602	0.000406202	0.0459916	SLC6A11	Macrophage	down
2.04358	4.04603	1.08917	3.71477	0.000203385	0.0289485	ENSG00000290072	Macrophage	up
10.2166	2.02541	0.517262	3.91564	9.01649e-05	0.0195048	KBTBD8	Macrophage	up
10.3086	-2.01973	0.400199	-5.0468	4.49268e-07	0.000350312	LINC00506	Macrophage	down
227.876	2.27819	0.520412	4.37767	1.19954e-05	0.00448177	RARRES1	Macrophage	up
20.8336	-1.59344	0.380212	-4.19093	2.77819e-05	0.00790857	SOX2-OT	Macrophage	down
410.366	1.18495	0.254972	4.6474	3.36149e-06	0.00172243	TRA2B	Macrophage	up
66.1138	-1.57916	0.445772	-3.54253	0.000396311	0.0452703	P3H2	Macrophage	down
4.87271	-2.0881	0.583346	-3.57952	0.00034423	0.0413616	REELD1	Macrophage	down
464.788	1.35041	0.333315	4.05146	5.08998e-05	0.0132295	BASP1	Macrophage	up
9.38343	1.99294	0.523456	3.80726	0.000140513	0.023658	ENSG00000289152	Macrophage	up
15.0546	-1.23826	0.33517	-3.69442	0.00022039	0.0306394	SMIM15-AS1	Macrophage	down
58.4706	1.12465	0.294163	3.82321	0.000131726	0.0233898	GLRX	Macrophage	up
75.592	1.11633	0.29537	3.77942	0.000157197	0.0241513	STARD4	Macrophage	up
4.42615	-2.60873	0.660592	-3.94907	7.8455e-05	0.0180386	ENSG00000283897	Macrophage	down
8.85104	-2.67664	0.629926	-4.24914	2.14594e-05	0.00696544	ENSG00000249738	Macrophage	down
41.1831	2.17603	0.453917	4.79389	1.6358e-06	0.0010116	ENSG00000253736	Macrophage	up
17.2217	-1.79882	0.421186	-4.27085	1.94733e-05	0.00658932	LTC4S	Macrophage	down
9.53719	2.34748	0.667117	3.51884	0.000433438	0.048583	FOXQ1	Macrophage	up
70.2141	-1.12458	0.295237	-3.80907	0.000139491	0.023658	HULC	Macrophage	down
73.9252	1.18942	0.339274	3.50576	0.000455299	0.0495819	SOX4	Macrophage	up
5.44936	2.3632	0.643735	3.67107	0.000241533	0.0325689	H3C1	Macrophage	up
233.136	2.61274	0.492163	5.30869	1.10418e-07	0.000180021	H2BC4	Macrophage	up
661.061	1.99016	0.478465	4.15946	3.19004e-05	0.0089391	H2AC6	Macrophage	up
17.0055	1.38274	0.359322	3.8482	0.000118987	0.0225085	H2BC6	Macrophage	up
21.1127	2.43802	0.469582	5.19189	2.08175e-07	0.000233878	H2AC7	Macrophage	up
31.4953	1.54384	0.384097	4.01939	5.835e-05	0.0147279	H2BC8	Macrophage	up
11.2423	1.87165	0.480863	3.89227	9.93101e-05	0.0202389	H2AC8	Macrophage	up
189.775	1.39095	0.327931	4.24158	2.21947e-05	0.00696544	H1-3	Macrophage	up
51.6867	2.92246	0.553935	5.27581	1.32168e-07	0.000197526	H2BC11	Macrophage	up
12.8579	2.37211	0.549106	4.31994	1.56069e-05	0.00559788	H2AC11	Macrophage	up
2.43456	4.34141	1.22005	3.55838	0.000373153	0.043175	H2BC13	Macrophage	up
6.83993	2.68103	0.749265	3.57822	0.000345949	0.0413616	H3C10	Macrophage	up
13.9849	2.12054	0.594099	3.56934	0.000357885	0.0422257	H2AC15	Macrophage	up
26.8235	2.98237	0.746983	3.99255	6.53656e-05	0.0156302	H3C12	Macrophage	up
6.95695	-2.06972	0.568582	-3.64015	0.000272484	0.0357823	KHDRBS2-OT1	Macrophage	down
63.9939	1.09587	0.279943	3.91461	9.05503e-05	0.0195048	UBE2J1	Macrophage	up
9.50243	-1.66604	0.461624	-3.60908	0.000307282	0.0382694	ENSG00000287683	Macrophage	down
226.244	1.02115	0.184526	5.53387	3.13242e-08	9.3628e-05	AMD1	Macrophage	up
27.2576	2.12586	0.494737	4.29695	1.73168e-05	0.0060894	LINC03002	Macrophage	up
18.0819	1.13177	0.296868	3.81237	0.000137642	0.023658	ZFAND2A	Macrophage	up
49.2341	-1.11617	0.294466	-3.7905	0.000150344	0.023658	LINC03007	Macrophage	down
66.7484	-1.26106	0.23249	-5.42414	5.82329e-08	0.000134528	ENSG00000289053	Macrophage	down
24.8893	1.66275	0.394202	4.21801	2.46463e-05	0.00724601	AMPH	Macrophage	up
16.0872	1.39145	0.35	3.97556	7.02128e-05	0.0165684	INHBA	Macrophage	up
18.2932	2.05563	0.513122	4.00612	6.17239e-05	0.0149589	TAC1	Macrophage	up
10.3805	-1.3642	0.354549	-3.8477	0.000119232	0.0225085	GAL3ST4	Macrophage	down
171.099	1.47309	0.249109	5.91341	3.35098e-09	3.00482e-05	IFRD1	Macrophage	up
490.924	1.22771	0.262114	4.68386	2.81518e-06	0.00157773	SDCBP	Macrophage	up
143.488	1.23227	0.281276	4.38099	1.18139e-05	0.00448177	RIPK2	Macrophage	up
12.3483	-1.80716	0.348863	-5.18016	2.21698e-07	0.000233878	LINC02055	Macrophage	down
21.753	1.8594	0.493523	3.7676	0.000164827	0.0248405	CKS2	Macrophage	up
468.545	1.1866	0.266816	4.44726	8.6973e-06	0.00385137	UGCG	Macrophage	up
25.5942	-1.28801	0.347851	-3.70278	0.000213251	0.0301137	DELEC1	Macrophage	down
120.731	-1.79532	0.331314	-5.41877	6.00102e-08	0.000134528	GGTA1	Macrophage	down
22.8912	-1.05672	0.289169	-3.65432	0.000257862	0.0345112	MIR181A2HG	Macrophage	down
391.679	2.04281	0.454195	4.49766	6.87068e-06	0.0032426	HSPA5	Macrophage	up
25.003	1.36978	0.376542	3.63778	0.000274995	0.0357823	IER5L	Macrophage	up
61.029	2.50636	0.489282	5.12254	3.01449e-07	0.000284536	ENSG00000288755	Macrophage	up
29.4578	-1.79635	0.467316	-3.84398	0.000121057	0.022615	NEBL	Macrophage	down
58.6806	1.56951	0.414062	3.79052	0.00015033	0.023658	OTUD1	Macrophage	up
468.64	-1.09324	0.285076	-3.83492	0.000125605	0.0227535	PALD1	Macrophage	down
17.7188	-1.54448	0.273959	-5.63764	1.72398e-08	6.18358e-05	PPP3CB-AS1	Macrophage	down
15.1887	-1.63399	0.430185	-3.79835	0.000145665	0.023658	SLC16A12	Macrophage	down
14.4867	-2.30094	0.656346	-3.50568	0.00045544	0.0495819	SORCS3	Macrophage	down
39.5772	1.47279	0.366706	4.01626	5.91284e-05	0.0147279	BAG3	Macrophage	up
77.6372	1.16786	0.316094	3.69467	0.000220175	0.0306394	NXF1	Macrophage	up
19.1632	-3.06575	0.822243	-3.72851	0.000192613	0.0278574	LINC02712	Macrophage	down
432.177	1.27335	0.272743	4.66867	3.03154e-06	0.0016475	CLEC2B	Macrophage	up
140.773	1.03115	0.28929	3.56442	0.000364664	0.0427444	GABARAPL1	Macrophage	up
30.7581	-1.26741	0.361573	-3.50525	0.000456173	0.0495819	LINC01252	Macrophage	down
64.388	1.0677	0.303816	3.5143	0.000440915	0.0488109	TUBA1C	Macrophage	up
81.481	1.14403	0.30116	3.79874	0.000145432	0.023658	BTG1-DT	Macrophage	up
242.655	1.89688	0.389272	4.87289	1.09979e-06	0.000758599	HSPH1	Macrophage	up
32.4392	1.57656	0.338589	4.65627	3.21996e-06	0.00169843	ING1	Macrophage	up
2.23968	4.23962	1.1166	3.79691	0.000146511	0.023658	NUBPL-DT	Macrophage	up
7.37635	2.30383	0.568593	4.0518	5.08252e-05	0.0132295	ENSG00000278002	Macrophage	up
12.6508	-1.78537	0.453542	-3.93651	8.26748e-05	0.0185336	LINC02284	Macrophage	down
2909.21	1.03375	0.203966	5.06825	4.01499e-07	0.000336233	HIF1A	Macrophage	up
100.704	1.8367	0.522334	3.51633	0.000437558	0.0487402	SERPINA3	Macrophage	up
25.6357	-1.66652	0.425609	-3.9156	9.01793e-05	0.0195048	UNC13C	Macrophage	down
6.95868	2.11719	0.541138	3.91247	9.13574e-05	0.0195048	ENSG00000288872	Macrophage	up
19.8994	-1.11573	0.293684	-3.79907	0.000145242	0.023658	MPV17L	Macrophage	down
8.14617	2.33311	0.641411	3.63746	0.000275341	0.0357823	SDR42E2	Macrophage	up
16.5762	-2.46162	0.637708	-3.86011	0.000113335	0.0225085	ADGRG5	Macrophage	down
16.3617	2.17139	0.416255	5.21648	1.82351e-07	0.000233878	ENSG00000289618	Macrophage	up
6.52826	-1.78359	0.44516	-4.00663	6.15925e-05	0.0149589	MAFTRR	Macrophage	down
12.9786	-2.92751	0.767154	-3.81607	0.000135597	0.023658	OR3A2	Macrophage	down
8.2409	1.77001	0.480078	3.68692	0.000226982	0.031313	SPAG5-AS1	Macrophage	up
69.6379	1.17013	0.247363	4.73042	2.24061e-06	0.00129623	EVI2A	Macrophage	up
76.3671	-1.68252	0.397709	-4.23053	2.33138e-05	0.00708661	ARL17B	Macrophage	down
10.5749	1.87143	0.521081	3.59144	0.000328855	0.0398492	ENSG00000273702	Macrophage	up
8.08276	-2.45545	0.544511	-4.50947	6.49898e-06	0.00315007	ENSG00000290457	Macrophage	down
921.357	1.04083	0.291352	3.5724	0.000353719	0.0420106	GNA13	Macrophage	up
9.74561	2.52882	0.494972	5.10902	3.23832e-07	0.00029038	ENSG00000289070	Macrophage	up
11.6706	1.82269	0.394451	4.62081	3.82243e-06	0.00190421	ENSG00000264000	Macrophage	up
253.691	1.7324	0.392755	4.41089	1.02947e-05	0.00419601	GADD45B	Macrophage	up
5.39729	3.14972	0.865432	3.63948	0.000273187	0.0357823	CD70	Macrophage	up
195.016	-1.36483	0.284016	-4.80546	1.54396e-06	0.000988904	C3	Macrophage	down
11.2896	-1.37689	0.357186	-3.85481	0.000115818	0.0225085	PXMP4	Macrophage	down
11.7154	2.112	0.472888	4.46618	7.96293e-06	0.00366172	ENSG00000289872	Macrophage	up
985.75	1.40261	0.277025	5.06311	4.12464e-07	0.000336233	SAMSN1	Macrophage	up
11.7366	-1.6039	0.424442	-3.77884	0.000157561	0.0241513	CHODL	Macrophage	down
28.4278	1.45831	0.373761	3.90171	9.55138e-05	0.0201523	ADAMTS1	Macrophage	up
9.23581	2.00877	0.564379	3.55926	0.000371899	0.043175	SREBF2-AS1	Macrophage	up
74.0309	-1.62021	0.447307	-3.62215	0.000292162	0.037426	ENSG00000273748	Macrophage	down
10.3551	-5.8286	1.35887	-4.28929	1.79245e-05	0.00144404	PLEKHG5	Mast cell	down
13.5254	-2.0298	0.624272	-3.25146	0.00114813	0.0452382	DHRS3	Mast cell	down
38.4209	-5.24136	1.10218	-4.75543	1.98022e-06	0.000205374	HSPB7	Mast cell	down
26.8888	-7.15885	1.35023	-5.30196	1.14567e-07	1.43575e-05	MECR	Mast cell	down
65.2885	-8.82883	0.906263	-9.74201	1.99568e-22	1.38515e-19	PTPRU	Mast cell	down
34.8439	-8.60042	1.50631	-5.70959	1.13247e-08	1.87034e-06	CSMD2	Mast cell	down
75.5885	-7.66057	1.28169	-5.97692	2.2739e-09	4.88509e-07	DDAH1	Mast cell	down
11.016	-2.01349	0.601831	-3.3456	0.000821034	0.0359366	ARHGAP29	Mast cell	down
8.63067	6.36332	1.42947	4.45151	8.52684e-06	0.000742309	EXTL2	Mast cell	up
30.7851	-6.89344	1.20809	-5.70609	1.15603e-08	1.87034e-06	ENSG00000287979	Mast cell	down
3.62398	-3.05224	0.883269	-3.45562	0.000549039	0.0263509	LIX1L	Mast cell	down
100.526	-9.7174	1.46301	-6.64204	3.09368e-11	1.11657e-08	FLG-AS1	Mast cell	down
29.5717	-7.97753	1.58223	-5.04197	4.60774e-07	5.177e-05	S100A16	Mast cell	down
15.0951	-5.51968	1.29833	-4.25137	2.12465e-05	0.00166702	DEDD	Mast cell	down
23.2892	-1.82905	0.543356	-3.36622	0.000762061	0.0342093	DDR2	Mast cell	down
15.2984	-5.4411	1.20652	-4.50974	6.49061e-06	0.00057985	ENSG00000231424	Mast cell	down
8.19147	-3.03076	0.701977	-4.31747	1.57831e-05	0.00130652	FMO2	Mast cell	down
38.974	-8.98996	2.37571	-3.78412	0.000154253	0.00927882	TNN	Mast cell	down
87.7192	-9.90876	1.59267	-6.22149	4.92448e-10	1.43334e-07	HSD11B1	Mast cell	down
7.41891	-3.12706	0.869613	-3.59592	0.000323248	0.0173611	ESRRG	Mast cell	down
5.36153	-2.90561	0.758483	-3.83082	0.000127719	0.00800282	TGFB2	Mast cell	down
53.4001	-8.13053	1.02208	-7.95485	1.79343e-15	7.70579e-13	LYPLAL1-DT	Mast cell	down
8.01834	-2.23795	0.6773	-3.30422	0.000952405	0.0399019	OBSCN	Mast cell	down
64.9669	-9.18526	1.47837	-6.21312	5.19433e-10	1.43941e-07	CATSPERE	Mast cell	down
8.40667	-2.80119	0.667047	-4.19939	2.67641e-05	0.00204654	MBOAT2	Mast cell	down
3.95477	-3.04328	0.840015	-3.62289	0.000291332	0.0158355	EMILIN1	Mast cell	down
8.68755	-4.11157	0.887822	-4.63107	3.6378e-06	0.000352945	TMEM178A	Mast cell	down
28.6057	-6.82002	1.20202	-5.67381	1.39657e-08	2.21074e-06	ENSG00000288886	Mast cell	down
37.0745	-8.37693	1.42982	-5.85872	4.66435e-09	8.95457e-07	ENSG00000289082	Mast cell	down
12.0241	-5.26717	1.28731	-4.09161	4.28385e-05	0.00316829	POU3F3	Mast cell	down
200.979	-10.2685	1.56097	-6.57826	4.75969e-11	1.59062e-08	DPP10	Mast cell	down
4.70778	-4.63199	1.38608	-3.34179	0.000832401	0.0359366	LYPD6B	Mast cell	down
2.77216	-3.34751	0.964146	-3.47199	0.000516614	0.0256121	RBM43	Mast cell	down
18.0669	-3.8297	0.943069	-4.06089	4.88855e-05	0.00358613	NEB	Mast cell	down
4.41864	-2.73059	0.821922	-3.3222	0.0008931	0.037833	PLA2R1	Mast cell	down
51.6512	-8.86215	1.44875	-6.11711	9.52875e-10	2.38828e-07	FAP	Mast cell	down
3.57032	-3.73494	1.05653	-3.53512	0.000407596	0.0209669	C2CD6	Mast cell	down
5.57051	-4.76459	1.23417	-3.86057	0.000113123	0.00723907	ACADL	Mast cell	down
43.4874	-1.30632	0.368831	-3.54178	0.000397439	0.0206097	TNS1	Mast cell	down
3.20557	-3.86193	1.00917	-3.82685	0.000129793	0.00807668	NEK10	Mast cell	down
45.1699	-8.66822	1.43792	-6.02831	1.65685e-09	3.74109e-07	MYL3	Mast cell	down
40.3376	-8.58889	0.93748	-9.16168	5.10959e-20	2.56132e-17	PTH1R	Mast cell	down
74.3478	-8.80908	1.51345	-5.82054	5.86578e-09	1.03778e-06	NCKIPSD	Mast cell	down
3.13012	-3.66827	1.0635	-3.44923	0.000562179	0.0266976	DNAH1	Mast cell	down
44.788	4.75373	1.05228	4.51753	6.25652e-06	0.000564526	CADPS	Mast cell	up
11.7002	-2.23	0.647296	-3.4451	0.000570838	0.0269669	ST3GAL6	Mast cell	down
18.4408	-2.73822	0.753726	-3.63292	0.000280233	0.0154179	COL8A1	Mast cell	down
4.10618	-3.36699	0.958185	-3.51393	0.000441536	0.0222569	TMEM45A	Mast cell	down
9.70226	-2.56569	0.711627	-3.60538	0.000311692	0.0168407	ABI3BP	Mast cell	down
67.4458	-9.07917	0.938287	-9.67632	3.80159e-22	2.45013e-19	CIP2A	Mast cell	down
2.55406	-3.58281	1.0336	-3.46633	0.000527609	0.0257331	PLCH1	Mast cell	down
6.88956	-2.99624	0.859808	-3.48478	0.000492547	0.0246903	KCNAB1	Mast cell	down
12.7461	-3.54103	1.02467	-3.45577	0.000548733	0.0263509	ENSG00000289884	Mast cell	down
44.7281	-8.48107	1.4865	-5.70539	1.1608e-08	1.87034e-06	SERPINI1	Mast cell	down
33.8633	-7.7089	1.45182	-5.30982	1.09731e-07	1.41443e-05	CLDN11	Mast cell	down
48.4717	-8.00355	1.39753	-5.72691	1.02275e-08	1.74118e-06	SLC7A14-AS1	Mast cell	down
16.0074	-5.75866	1.22316	-4.70801	2.50144e-06	0.000253601	TMEM44-AS1	Mast cell	down
39.2013	-7.58348	0.977807	-7.7556	8.79255e-15	3.60614e-12	CYTL1	Mast cell	down
85.7682	-9.87643	1.59015	-6.21101	5.26439e-10	1.43941e-07	STK32B	Mast cell	down
3.92214	5.02984	1.50151	3.34986	0.000808513	0.0357608	HTRA3	Mast cell	up
32.077	-6.52063	1.35614	-4.80822	1.52282e-06	0.000161652	SMIM20	Mast cell	down
25.1949	-6.90239	1.04342	-6.61514	3.71189e-11	1.28817e-08	LINC02506	Mast cell	down
25.0629	-7.00115	1.47518	-4.74596	2.07521e-06	0.000212779	CDS1	Mast cell	down
30.8757	-3.18872	0.690012	-4.62126	3.81417e-06	0.00036612	UNC5C	Mast cell	down
8.71635	-3.70582	0.852682	-4.34608	1.38593e-05	0.00117974	ETNPPL	Mast cell	down
6.22521	-3.4431	0.735633	-4.68045	2.86239e-06	0.000286971	PANCR	Mast cell	down
34.7664	-8.21388	1.59381	-5.15363	2.55495e-07	3.07378e-05	MMAA	Mast cell	down
38.3626	-7.95996	1.45413	-5.47403	4.39916e-08	6.20213e-06	ENSG00000290441	Mast cell	down
8.70674	-3.02714	0.804515	-3.76269	0.000168096	0.00991327	GUCY1B1	Mast cell	down
95.8707	-9.02617	1.54721	-5.83385	5.41638e-09	9.9153e-07	CDKN2AIP	Mast cell	down
13.2673	-5.62115	1.62067	-3.46841	0.000523552	0.025674	ENSG00000286753	Mast cell	down
29.0169	-7.99846	1.56463	-5.11205	3.1869e-07	3.72575e-05	CCDC152	Mast cell	down
51.2962	-8.74112	1.48588	-5.88279	4.03403e-09	7.91284e-07	FGF10	Mast cell	down
52.2713	-8.85177	1.46949	-6.02368	1.7049e-09	3.75203e-07	EMB	Mast cell	down
74.2205	-9.35629	2.21233	-4.22915	2.34572e-05	0.0018246	ITGA2	Mast cell	down
16.9937	-6.55175	1.44001	-4.54978	5.37023e-06	0.000494445	GPX8	Mast cell	down
10.1337	-5.16746	0.857222	-6.02815	1.65847e-09	3.74109e-07	RGS7BP	Mast cell	down
5.19317	-3.08763	0.900031	-3.43058	0.00060229	0.0281579	CKMT2	Mast cell	down
4.33641	-4.308	0.962264	-4.47694	7.572e-06	0.000669825	ENSG00000249776	Mast cell	down
40.3376	-8.58889	0.93748	-9.16168	5.10959e-20	2.56132e-17	CDO1	Mast cell	down
11.3472	-2.38161	0.623893	-3.81734	0.0001349	0.00831399	GRAMD2B	Mast cell	down
63.3883	-8.42621	1.41233	-5.96619	2.4286e-09	5.0961e-07	P4HA2	Mast cell	down
130.61	-9.1748	1.48128	-6.19384	5.87161e-10	1.55822e-07	PITX1	Mast cell	down
6.45891	-3.49286	1.04776	-3.33364	0.000857181	0.0366557	CXXC5	Mast cell	down
9.00765	-3.35116	0.716594	-4.67651	2.91794e-06	0.000289325	STK32A	Mast cell	down
4.54766	-2.7835	0.824995	-3.37396	0.000740951	0.033596	PPARGC1B	Mast cell	down
4.74972	-3.15873	0.887098	-3.56075	0.000369801	0.0196109	PDGFRB	Mast cell	down
122.348	-10.0745	0.892777	-11.2845	1.56525e-29	2.35387e-26	SYNPO	Mast cell	down
4.30364	-2.84965	0.874066	-3.26022	0.00111325	0.0446436	LINC03000	Mast cell	down
45.9801	-9.00504	1.5232	-5.9119	3.38178e-09	6.78083e-07	ENSG00000253693	Mast cell	down
37.6454	-7.49411	1.51742	-4.93872	7.86372e-07	8.54872e-05	TENM2	Mast cell	down
38.4236	-9.66314	2.49659	-3.87053	0.000108598	0.00699916	FAM153A	Mast cell	down
2.76558	-3.40064	0.980409	-3.46859	0.00052319	0.025674	GCNT2	Mast cell	down
10.4193	-4.88161	1.34572	-3.62751	0.000286164	0.0156488	GMNN	Mast cell	down
15.5276	-5.96853	1.30882	-4.56024	5.10941e-06	0.000475281	VARS1	Mast cell	down
235.862	-10.5252	0.873624	-12.0477	1.99422e-33	8.99691e-30	TSBP1-AS1	Mast cell	down
221.032	-11.0002	2.91706	-3.77101	0.00016259	0.00965166	HLA-DRB5	Mast cell	down
4.4028	-2.86294	0.805365	-3.55484	0.000378211	0.0198407	HMGCLL1	Mast cell	down
21.9798	-5.04267	0.720222	-7.00155	2.5315e-12	9.5174e-10	ENSG00000225096	Mast cell	down
105.762	-8.83045	2.67367	-3.30275	0.000957421	0.0399019	COL19A1	Mast cell	down
16.4255	-1.8553	0.536881	-3.45569	0.000548882	0.0263509	OGFRL1	Mast cell	down
19.8164	-2.10347	0.485821	-4.32972	1.49301e-05	0.00124736	GRIK2	Mast cell	down
63.9425	-9.75023	2.51006	-3.88446	0.000102558	0.00665743	PKIB	Mast cell	down
5.2368	-4.29332	1.09929	-3.90555	9.40112e-05	0.00628343	RNF217-AS1	Mast cell	down
5.51093	-2.91088	0.792032	-3.6752	0.000237661	0.0134026	ENPP1	Mast cell	down
67.4437	-9.23691	1.4828	-6.22937	4.6831e-10	1.40852e-07	SAMD5	Mast cell	down
53.5556	-9.23017	0.958692	-9.62788	6.09719e-22	3.43844e-19	ENSG00000227681	Mast cell	down
10.484	-3.56483	0.882282	-4.04046	5.33459e-05	0.00385072	SASH1	Mast cell	down
31.8782	-1.61173	0.438787	-3.67315	0.000239578	0.0134268	SYNE1	Mast cell	down
16.5199	-6.26661	1.16424	-5.3826	7.34179e-08	9.88731e-06	THBS2	Mast cell	down
40.1219	-8.57558	0.937271	-9.14953	5.71841e-20	2.71564e-17	CARD11	Mast cell	down
22.8628	-1.88599	0.481735	-3.915	9.04039e-05	0.00612342	PDE1C	Mast cell	down
12.4093	-1.78689	0.526008	-3.39708	0.000681087	0.0311951	OGDH	Mast cell	down
16.5087	-4.52994	0.802188	-5.64698	1.6329e-08	2.54029e-06	ZNF804B	Mast cell	down
11.565	-4.64643	0.850152	-5.4654	4.61856e-08	6.41127e-06	CDK14	Mast cell	down
6.04257	-2.5094	0.763031	-3.28872	0.00100644	0.0412974	GNG11	Mast cell	down
14.4427	-2.25153	0.654242	-3.44143	0.000578642	0.0271932	LAMB1	Mast cell	down
5.69637	-3.07169	0.91856	-3.34402	0.000825726	0.0359366	MDFIC	Mast cell	down
15.6847	-6.33594	1.08355	-5.84737	4.9941e-09	9.38787e-07	LINC00996	Mast cell	down
11.0438	-2.08249	0.647111	-3.21813	0.00129028	0.0495412	CSGALNACT1	Mast cell	down
4.64876	-3.91629	1.03792	-3.77321	0.000161158	0.00962999	ZFHX4-AS1	Mast cell	down
4.69845	-3.68636	1.14349	-3.22379	0.00126508	0.0492016	ENSG00000285744	Mast cell	down
41.4214	-6.93043	1.30708	-5.30223	1.14394e-07	1.43575e-05	HEY1	Mast cell	down
19.4747	-6.15793	1.65922	-3.71133	0.00020617	0.0118489	CA3	Mast cell	down
44.8256	-8.9523	2.59314	-3.45231	0.000555817	0.0265351	ENSG00000253553	Mast cell	down
16.0563	-2.4085	0.566245	-4.25345	2.10498e-05	0.00166608	RUNX1T1	Mast cell	down
3.92641	-3.9733	1.09123	-3.6411	0.000271472	0.0150276	MATN2	Mast cell	down
15.9624	-2.62226	0.67265	-3.8984	9.68302e-05	0.00642426	RSPO2	Mast cell	down
77.0347	-9.68679	0.948311	-10.2148	1.7025e-24	1.70685e-21	CCN4	Mast cell	down
52.9215	-5.71947	1.22531	-4.66777	3.04487e-06	0.000298629	CHRAC1	Mast cell	down
3.62663	-2.95114	0.882893	-3.34258	0.000830044	0.0359366	SLC45A4	Mast cell	down
3.10509	-3.59097	0.97476	-3.68396	0.000229641	0.0131142	GPAA1	Mast cell	down
48.5016	-7.7682	1.53756	-5.05229	4.36544e-07	4.986e-05	HINT2	Mast cell	down
6.27404	-2.5674	0.767644	-3.34452	0.00082426	0.0359366	WNK2	Mast cell	down
86.1343	-9.4804	2.35261	-4.02973	5.58413e-05	0.00399337	COL27A1	Mast cell	down
5.95951	-2.93193	0.900392	-3.25628	0.00112881	0.0449825	DAB2IP	Mast cell	down
10.8036	-2.56183	0.689302	-3.71656	0.000201955	0.0116811	LMX1B	Mast cell	down
29.9156	-8.06332	1.55254	-5.19363	2.06229e-07	2.54905e-05	MRPS2	Mast cell	down
55.5107	-7.63349	0.945733	-8.0715	6.94375e-16	3.13267e-13	AKR1C1	Mast cell	down
32.4111	-1.90003	0.471858	-4.02671	5.65637e-05	0.00399337	FRMD4A	Mast cell	down
13.1091	-1.90248	0.590494	-3.22184	0.00127372	0.0493005	MPP7	Mast cell	down
49.1463	-2.01956	0.539908	-3.74056	0.000183612	0.010758	PRKG1	Mast cell	down
77.347	-9.74422	1.54277	-6.31604	2.68352e-10	8.34945e-08	STOX1	Mast cell	down
11.3533	-3.78884	0.756534	-5.00816	5.49541e-07	6.04696e-05	CDH23	Mast cell	down
51.2517	-8.85085	1.44869	-6.10956	9.99044e-10	2.43632e-07	FUT11	Mast cell	down
53.8438	-8.15055	1.40623	-5.79605	6.78965e-09	1.17813e-06	PLAC9	Mast cell	down
6.66518	-3.4849	0.861645	-4.04447	5.24418e-05	0.00381599	LINC01374	Mast cell	down
53.5089	-8.84607	2.24469	-3.94088	8.11833e-05	0.00559173	CC2D2B	Mast cell	down
188.065	-10.2196	0.85585	-11.9408	7.24913e-33	2.1803e-29	SCD	Mast cell	down
11.5783	-2.49369	0.603951	-4.12897	3.64399e-05	0.00273998	SH3PXD2A	Mast cell	down
5.88095	-2.98562	0.728407	-4.09884	4.15227e-05	0.00309636	EMX2OS	Mast cell	down
26.3992	-1.92045	0.481044	-3.99225	6.54494e-05	0.00457791	FGFR2	Mast cell	down
6.44116	5.74488	1.77372	3.23889	0.00119997	0.0468716	BET1L	Mast cell	up
151.842	-10.2165	0.923778	-11.0594	1.97343e-28	2.54374e-25	ENSG00000255240	Mast cell	down
30.2211	-7.19403	1.0102	-7.12138	1.06854e-12	4.19194e-10	ATG2A	Mast cell	down
53.9918	-8.76533	2.30268	-3.80659	0.000140898	0.00859004	YIF1A	Mast cell	down
4.65393	-2.75638	0.81847	-3.36773	0.000757909	0.0341931	PRSS23	Mast cell	down
13.5045	-2.20555	0.575476	-3.83257	0.000126809	0.0080014	YAP1	Mast cell	down
231.515	-10.7674	0.877337	-12.2729	1.26679e-34	1.14302e-30	GRIA4	Mast cell	down
6.44525	-2.35979	0.709667	-3.32521	0.000883511	0.0376034	GUCY1A2	Mast cell	down
2.88344	-3.03053	0.915003	-3.31205	0.000926156	0.03905	POGLUT3	Mast cell	down
22.0114	-6.33233	1.67262	-3.78589	0.000153161	0.00927497	HSPB2	Mast cell	down
38.6539	-7.7012	2.25113	-3.42104	0.000623817	0.0290139	CCDC15	Mast cell	down
8.93821	-3.41032	0.871406	-3.91358	9.09385e-05	0.00612342	CDON	Mast cell	down
4.92864	-2.60428	0.726495	-3.58471	0.000337452	0.0180167	ETS1	Mast cell	down
5.28925	4.75106	1.42269	3.33949	0.000839328	0.0360631	CLEC2B	Mast cell	up
11.4622	-2.10096	0.603901	-3.47898	0.00050333	0.0250914	RERG	Mast cell	down
4.9179	-2.85619	0.877326	-3.25557	0.00113167	0.0449825	PFKM	Mast cell	down
54.7517	-8.62261	0.892513	-9.66105	4.41327e-22	2.65473e-19	RARG	Mast cell	down
165.19	-9.74011	0.821896	-11.8508	2.13215e-32	3.84768e-29	ERBB3	Mast cell	down
17.3358	-2.2966	0.700341	-3.27926	0.0010408	0.0424936	ACSS3	Mast cell	down
250.871	-11.4104	2.26382	-5.04032	4.64742e-07	5.177e-05	RMST	Mast cell	down
3.88114	-4.24441	1.05416	-4.02635	5.66498e-05	0.00399337	ADGRD1	Mast cell	down
5.34242	-3.79778	0.880632	-4.31256	1.61378e-05	0.00132374	TNFRSF19	Mast cell	down
13.6069	-3.56736	0.829331	-4.30149	1.69652e-05	0.00137907	FLT1	Mast cell	down
21.3683	-2.34172	0.602268	-3.88817	0.000101004	0.00660407	PCDH9	Mast cell	down
10.5448	-2.07972	0.616204	-3.37506	0.000737996	0.033596	EFNB2	Mast cell	down
18.6381	-1.466	0.452458	-3.24008	0.00119495	0.0468716	COL4A2	Mast cell	down
3.16887	4.78559	1.42733	3.35283	0.000799905	0.0355544	TM9SF1	Mast cell	up
51.1649	-9.00731	2.75816	-3.2657	0.00109195	0.0441824	COCH	Mast cell	down
27.5742	-2.23298	0.631816	-3.53422	0.000408974	0.0209669	HIF1A-AS3	Mast cell	down
12.2209	-4.14273	0.775258	-5.34368	9.10759e-08	1.2085e-05	FLRT2	Mast cell	down
15.7874	-6.52833	1.4291	-4.56813	4.92088e-06	0.000462512	GPR176	Mast cell	down
89.8871	-2.11815	0.502514	-4.21511	2.49655e-05	0.00192533	RORA	Mast cell	down
62.9937	-9.42401	1.53232	-6.15017	7.7399e-10	1.99535e-07	ENSG00000259675	Mast cell	down
14.4704	-2.58248	0.755515	-3.41817	0.000630432	0.0291712	THSD4	Mast cell	down
11.0515	-5.63346	1.24441	-4.52701	5.9824e-06	0.000545244	SNX33	Mast cell	down
54.8997	-8.94294	1.58981	-5.62514	1.85353e-08	2.83465e-06	ABHD17C	Mast cell	down
55.9419	-2.93276	0.739639	-3.96513	7.33573e-05	0.00509156	CEMIP	Mast cell	down
14.7141	-4.42323	0.923506	-4.78961	1.67109e-06	0.000175328	ADAMTSL3	Mast cell	down
33.1845	-8.14687	1.5895	-5.12544	2.96848e-07	3.52429e-05	PEX11A	Mast cell	down
43.6121	-6.84577	1.23492	-5.54351	2.96471e-08	4.45843e-06	NUDT16L1	Mast cell	down
110.334	-9.22056	1.55143	-5.94327	2.79395e-09	5.7295e-07	TMEM219	Mast cell	down
42.5567	-7.66868	1.31505	-5.83146	5.49446e-09	9.9153e-07	SEPHS2	Mast cell	down
6.8132	-3.06418	0.779687	-3.93001	8.4942e-05	0.0058063	NKD1	Mast cell	down
22.8274	-2.70117	0.693517	-3.89488	9.82466e-05	0.00647065	CDH11	Mast cell	down
3.41814	-3.97004	1.03507	-3.83553	0.000125293	0.00796142	ZNF594-DT	Mast cell	down
122.833	-8.3473	1.28924	-6.47457	9.50835e-11	3.06407e-08	MAP2K3	Mast cell	down
25.0344	-6.04321	1.17217	-5.15558	2.52854e-07	3.07378e-05	ALDOC	Mast cell	down
31.1014	-7.36283	2.25221	-3.26915	0.00107872	0.0438435	TMEM101	Mast cell	down
6.81374	4.34136	1.23202	3.52378	0.000425433	0.0216875	TEX14	Mast cell	up
24.7109	-2.0774	0.638399	-3.25409	0.00113758	0.0450191	ABCA8	Mast cell	down
20.0691	-6.00224	1.23608	-4.85586	1.19863e-06	0.000128753	MRPS7	Mast cell	down
22.8751	-8.34768	1.56466	-5.33514	9.54706e-08	1.24845e-05	CEP131	Mast cell	down
7.40063	-3.15723	0.741668	-4.25694	2.07248e-05	0.00165487	B4GALT6	Mast cell	down
10.0411	-2.84918	0.873307	-3.26252	0.00110427	0.0444814	ZBTB7C	Mast cell	down
2.64378	-3.61016	1.06272	-3.3971	0.000681036	0.0311951	MAPK4	Mast cell	down
48.1811	-8.16948	2.24044	-3.64637	0.000265975	0.0148142	CBLN2	Mast cell	down
11.9431	-5.71491	1.2473	-4.5818	4.60983e-06	0.000437837	WDR18	Mast cell	down
69.4825	-8.58239	2.33075	-3.68224	0.000231192	0.0131198	PRAM1	Mast cell	down
68.2723	-8.42522	0.853663	-9.86949	5.6452e-23	4.63061e-20	ILVBL	Mast cell	down
12.6871	-5.68126	1.69014	-3.36142	0.000775426	0.034637	PBX4	Mast cell	down
42.1759	-5.45857	1.22643	-4.45078	8.55592e-06	0.000742309	FXYD3	Mast cell	down
81.2381	-8.60856	0.874367	-9.84547	7.17037e-23	5.39152e-20	PAK4	Mast cell	down
71.3526	-8.59785	0.85178	-10.094	5.87408e-24	5.30018e-21	ZNF776	Mast cell	down
40.5293	-5.18143	1.3577	-3.81633	0.000135449	0.00831399	SYS1	Mast cell	down
40.869	-8.05061	1.45926	-5.51692	3.44997e-08	5.10313e-06	NEURL2	Mast cell	down
61.1645	-8.37173	1.52325	-5.49596	3.88592e-08	5.65527e-06	SLC2A4RG	Mast cell	down
153.224	-10.7004	1.02286	-10.4613	1.30092e-25	1.46728e-22	CYYR1	Mast cell	down
220.413	-10.4668	0.879799	-11.8968	1.22991e-32	2.77437e-29	ADAMTS5	Mast cell	down
15.3036	-5.81909	1.63484	-3.55943	0.000371657	0.0196109	GATD3	Mast cell	down
3.55327	-3.57947	0.961736	-3.72189	0.000197741	0.0115111	ZNF70	Mast cell	down
40.1991	-7.86002	2.23501	-3.51677	0.000436825	0.0221431	RASD2	Mast cell	down
58.0917	-9.0035	1.47751	-6.09371	1.10321e-09	2.61953e-07	TAFA5	Mast cell	down
17.5646	-4.75669	1.08996	-4.36411	1.27644e-05	0.00109689	SHOX	Mast cell	down
2.56797	-3.43262	1.03953	-3.3021	0.000959626	0.0399019	RAI2	Mast cell	down
8.98855	-5.38269	0.995374	-5.4077	6.38379e-08	8.72742e-06	ENSG00000233928	Mast cell	down
54.472	-5.51124	1.32687	-4.15356	3.27339e-05	0.002482	SYP	Mast cell	down
42.6358	-8.45804	1.54314	-5.48106	4.22775e-08	6.05508e-06	ITGB1BP2	Mast cell	down
3.8867	-4.02381	0.929041	-4.33114	1.48337e-05	0.00124736	PCDH19	Mast cell	down
3.30683	-3.75962	1.05888	-3.55057	0.000384402	0.0200489	SMIM10	Mast cell	down
17.2204	-1.87022	0.580677	-3.22075	0.00127854	0.0493005	EOLA2-DT	Mast cell	down
29.9179	-8.90291	2.70645	-3.28952	0.00100357	0.0412974	IRAK1	Mast cell	down
29.3689	-1.63723	0.497852	-3.28859	0.00100692	0.0412974	FLNA	Mast cell	down
230.144	-11.9424	2.33704	-5.11005	3.22076e-07	3.72575e-05	ENSG00000289707	Mast cell	down
15.4576	1.73443	0.426449	4.06716	4.759e-05	0.0179465	ENSG00000285646	Melanocyte	up
42.9925	-1.187	0.251435	-4.7209	2.34802e-06	0.00202562	TCEA3	Melanocyte	down
839.917	1.83228	0.483736	3.78777	0.000152003	0.0295691	GRIK3	Melanocyte	up
20.9977	6.52212	1.76432	3.69668	0.000218434	0.0362288	ENSG00000287400	Melanocyte	up
11.7903	1.42224	0.386552	3.67931	0.000233865	0.0368282	LRP8	Melanocyte	up
267.656	-1.0513	0.203794	-5.15864	2.48744e-07	0.000493557	DAB1	Melanocyte	down
10.0453	-1.71962	0.415948	-4.13421	3.5617e-05	0.0153633	CYP2J2	Melanocyte	down
223.511	1.00757	0.280544	3.59149	0.000328797	0.0424469	ENSG00000289612	Melanocyte	up
5.73892	2.67137	0.599535	4.45574	8.36052e-06	0.00535127	ENSG00000287190	Melanocyte	up
85.4849	1.22801	0.31871	3.85307	0.000116644	0.0266019	EFNA1	Melanocyte	up
963.478	1.84512	0.495375	3.72469	0.000195554	0.0337407	CFH	Melanocyte	up
70.8977	1.22893	0.34665	3.54516	0.000392376	0.0467822	BTG2	Melanocyte	up
3.85065	5.01779	0.87275	5.7494	8.95583e-09	7.95546e-05	DYRK3-AS1	Melanocyte	up
187.432	1.03188	0.254006	4.06243	4.85636e-05	0.0179465	CD55	Melanocyte	up
29.2249	-1.16042	0.31319	-3.70518	0.000211242	0.0359494	KCNH1	Melanocyte	down
14.4893	-1.27449	0.346256	-3.68078	0.000232522	0.0368282	ENSG00000230773	Melanocyte	down
30.8095	1.20268	0.312929	3.84331	0.000121385	0.0266279	LINC01122	Melanocyte	up
10.365	-1.76099	0.392255	-4.48941	7.14203e-06	0.00506115	PANTR1	Melanocyte	down
48.7295	1.4923	0.395216	3.77592	0.000159419	0.0298414	CLASP1-AS1	Melanocyte	up
23.312	-2.1869	0.607604	-3.59922	0.00031917	0.0419402	LYPD6B	Melanocyte	down
300.645	-1.20094	0.268134	-4.47888	7.5036e-06	0.00512465	GALNT3	Melanocyte	down
564.685	-1.1352	0.291188	-3.89852	9.67814e-05	0.0249394	ENSG00000229195	Melanocyte	down
103.875	-1.49604	0.369256	-4.0515	5.08901e-05	0.0179465	RAPGEF4	Melanocyte	down
2.64401	2.91221	0.716348	4.06535	4.79601e-05	0.0179465	ENSG00000288900	Melanocyte	up
119.812	1.28756	0.363496	3.54216	0.000396859	0.0468719	HSPE1	Melanocyte	up
28.777	-1.08853	0.307473	-3.54025	0.000399751	0.0469341	SNHG31	Melanocyte	down
4.74584	-1.77945	0.473476	-3.75826	0.000171098	0.031146	ENSG00000227769	Melanocyte	down
2.91083	2.70549	0.725177	3.7308	0.000190871	0.0335157	ENSG00000288819	Melanocyte	up
138.432	-1.06415	0.268724	-3.96	7.49489e-05	0.0225324	SATB1-AS1	Melanocyte	down
9.121	-1.92619	0.475956	-4.04698	5.18824e-05	0.0179465	ENSG00000272554	Melanocyte	down
212.892	-1.96587	0.452865	-4.34096	1.41864e-05	0.00827901	FRMD4B	Melanocyte	down
94.968	-1.07129	0.260597	-4.1109	3.94112e-05	0.0166383	ABI3BP	Melanocyte	down
184.146	-1.46384	0.226892	-6.4517	1.10601e-10	2.19454e-06	LSAMP	Melanocyte	down
29.8791	-1.11287	0.313833	-3.54606	0.000391035	0.0467822	LINC03051	Melanocyte	down
68.4621	-1.4074	0.295432	-4.76387	1.89918e-06	0.00188417	FBXO40	Melanocyte	down
23.0449	-1.48608	0.313471	-4.74071	2.12967e-06	0.00192077	P2RY12	Melanocyte	down
337.386	2.36134	0.451083	5.23482	1.6515e-07	0.000466894	RARRES1	Melanocyte	up
6.60305	-2.44981	0.630652	-3.88457	0.000102511	0.0251207	ENSG00000223930	Melanocyte	down
20.0412	1.34014	0.317884	4.21582	2.48875e-05	0.0123455	ENSG00000290021	Melanocyte	up
13.6199	1.90865	0.483686	3.94604	7.94537e-05	0.0228481	ENSG00000289331	Melanocyte	up
10.9896	-1.76623	0.454235	-3.88836	0.000100926	0.0251207	ENSG00000248138	Melanocyte	down
3.01046	-3.80451	0.830913	-4.5787	4.67864e-06	0.00357995	ENSG00000287389	Melanocyte	down
30.6294	-1.19025	0.332506	-3.57963	0.000344085	0.0440473	C4orf19	Melanocyte	down
20.243	-2.5282	0.660136	-3.82981	0.00012824	0.0269597	LINC02511	Melanocyte	down
466.888	-1.0645	0.25646	-4.15073	3.31414e-05	0.0146131	PDZD2	Melanocyte	down
7.52597	-2.79572	0.685206	-4.08011	4.50136e-05	0.0178632	ENSG00000251391	Melanocyte	down
48.8299	-1.37211	0.375984	-3.64938	0.000262877	0.0377971	PDE8B	Melanocyte	down
256.598	-1.11754	0.284984	-3.92139	8.80378e-05	0.0241382	CMYA5	Melanocyte	down
31.752	-1.49384	0.395544	-3.77667	0.000158941	0.0298414	FGF1	Melanocyte	down
17.6484	-2.14635	0.592149	-3.62468	0.00028932	0.039486	ENSG00000250842	Melanocyte	down
202.319	-1.43717	0.37699	-3.81222	0.000137723	0.0278847	PPP2R2B	Melanocyte	down
27.1101	-1.98054	0.527576	-3.75404	0.000174005	0.0313873	SH3TC2	Melanocyte	down
472.539	1.5913	0.434434	3.66293	0.000249342	0.0372397	GPX3	Melanocyte	up
4834.84	-1.18524	0.293232	-4.042	5.29972e-05	0.0179465	LINC03000	Melanocyte	down
8.91067	-1.75329	0.47796	-3.66827	0.000244194	0.0370539	LINC01938	Melanocyte	down
75.6258	-1.19158	0.220693	-5.39928	6.69086e-08	0.000225817	RIPOR2	Melanocyte	down
5.26024	2.42454	0.650375	3.7279	0.000193081	0.0336062	H2BC11	Melanocyte	up
39.5134	1.50034	0.306773	4.89071	1.00475e-06	0.00117272	CDKN1A	Melanocyte	up
1.64172	3.77546	1.04021	3.6295	0.00028397	0.0391287	SLC22A16	Melanocyte	up
30.6644	-1.20343	0.329056	-3.65723	0.000254958	0.0377527	ENSG00000227681	Melanocyte	down
1995.68	1.89102	0.472185	4.00482	6.20636e-05	0.0198623	PDE10A	Melanocyte	up
3.46369	-3.72694	0.892141	-4.17752	2.94708e-05	0.0135991	NPSR1-AS1	Melanocyte	down
103.411	-1.72779	0.410695	-4.20698	2.58801e-05	0.0125247	AOAH	Melanocyte	down
2.81053	-3.86644	1.00184	-3.85935	0.00011369	0.0265393	ENSG00000233539	Melanocyte	down
15.8571	-1.07708	0.303717	-3.54634	0.000390625	0.0467822	ENSG00000284523	Melanocyte	down
17.1976	-1.04054	0.275176	-3.78134	0.000155984	0.0297599	FAM66B	Melanocyte	down
13.4479	-2.04925	0.53332	-3.84243	0.00012182	0.0266279	PRAG1	Melanocyte	down
23.8574	-1.28228	0.35319	-3.63057	0.000282793	0.0391287	UNC5D	Melanocyte	down
29.606	-2.00122	0.494179	-4.04959	5.13074e-05	0.0179465	MMP16	Melanocyte	down
37.7843	1.05216	0.289018	3.64045	0.000272161	0.038573	LURAP1L	Melanocyte	up
8.79583	1.53136	0.394487	3.8819	0.000103642	0.0251207	ENSG00000287070	Melanocyte	up
47.6467	3.34375	0.619714	5.39563	6.82845e-08	0.000225817	ENSG00000288755	Melanocyte	up
117.328	1.62886	0.443204	3.67518	0.000237677	0.0370539	DEPP1	Melanocyte	up
81.5672	-1.46833	0.383662	-3.82714	0.000129639	0.0269597	PCDH15	Melanocyte	down
4.92838	-2.6059	0.716543	-3.63677	0.00027608	0.0388509	MYPN	Melanocyte	down
6.86477	-1.67255	0.474839	-3.52234	0.000427749	0.0479514	LINC00858	Melanocyte	down
3.78882	4.89322	1.06882	4.57815	4.691e-06	0.00357995	ENSG00000289301	Melanocyte	up
19.8762	-1.55122	0.407832	-3.80356	0.00014263	0.0283007	SORCS3	Melanocyte	down
26.7546	-1.16258	0.299898	-3.87658	0.000105933	0.0253244	ADD3-AS1	Melanocyte	down
163.188	-1.01539	0.250925	-4.04661	5.19654e-05	0.0179465	STK33	Melanocyte	down
5.72289	2.08303	0.571239	3.64651	0.000265823	0.0379457	ENSG00000290057	Melanocyte	up
12.4394	-1.44849	0.384288	-3.76928	0.000163722	0.0302911	SHANK2	Melanocyte	down
33.4401	1.30327	0.274337	4.75061	2.02799e-06	0.00191616	CLEC2B	Melanocyte	up
62.975	-1.03359	0.292408	-3.53476	0.000408144	0.0470954	ENSG00000255968	Melanocyte	down
13.9495	-1.28799	0.364544	-3.53316	0.000410622	0.0470954	ENSG00000274964	Melanocyte	down
1.90319	-4.22639	1.17397	-3.60009	0.000318104	0.0419402	AQP5	Melanocyte	down
4.92925	-2.27207	0.646119	-3.51648	0.000437304	0.0487472	WIF1	Melanocyte	down
169.299	1.23888	0.32295	3.83612	0.000124991	0.0269573	KCNMB4	Melanocyte	up
8.25331	-2.55363	0.710369	-3.59479	0.000324654	0.0423802	MGAT4C	Melanocyte	down
62.6181	-1.60721	0.44032	-3.65011	0.000262132	0.0377971	TMEM132C	Melanocyte	down
4.82079	2.95936	0.741156	3.9929	6.52702e-05	0.0202358	ENSG00000258820	Melanocyte	up
21.3661	-1.48566	0.4023	-3.69292	0.000221694	0.0362288	MKRN3	Melanocyte	down
12.2611	-1.32158	0.334089	-3.95577	7.62882e-05	0.0225927	PATL2	Melanocyte	down
2.49133	4.1887	1.15595	3.62359	0.000290543	0.039486	C2CD4A	Melanocyte	up
8.9887	-1.21349	0.343752	-3.53012	0.000415366	0.0470954	DNM1P35	Melanocyte	down
179.464	-1.22838	0.342075	-3.59097	0.000329444	0.0424469	ENSG00000259420	Melanocyte	down
488.851	-1.22948	0.322314	-3.81453	0.000136442	0.0278847	CEMIP	Melanocyte	down
86.6162	-1.30074	0.360475	-3.6084	0.000308091	0.0410278	ADAMTSL3	Melanocyte	down
27.5995	-1.31762	0.329829	-3.99487	6.47303e-05	0.0202358	ENSG00000275443	Melanocyte	down
38.7597	-1.64264	0.352569	-4.65906	3.17654e-06	0.00262621	LINC00923	Melanocyte	down
63.9659	-1.64207	0.445077	-3.68941	0.000224775	0.0362288	RBFOX1	Melanocyte	down
22.6666	-1.38053	0.389187	-3.54721	0.000389334	0.0467822	SYT17	Melanocyte	down
39.2682	1.59184	0.422517	3.76752	0.000164875	0.0302911	ACSM3	Melanocyte	up
11.608	2.23436	0.553007	4.04038	5.33638e-05	0.0179465	SDR42E2	Melanocyte	up
67.1759	-1.15513	0.228841	-5.04773	4.47101e-07	0.000648059	NKD1	Melanocyte	down
110.937	-2.06821	0.408452	-5.06353	4.11558e-07	0.000648059	ARL17B	Melanocyte	down
48.7175	1.81133	0.419638	4.31641	1.58586e-05	0.00899046	TEX14	Melanocyte	up
13.9534	-2.11588	0.572071	-3.69863	0.000216764	0.0362288	ENSG00000290457	Melanocyte	down
14.2004	-1.24861	0.338271	-3.69114	0.000223251	0.0362288	CARD14	Melanocyte	down
21.5909	1.4973	0.314283	4.76419	1.89611e-06	0.00188417	NARF-AS2	Melanocyte	up
144.766	3.60199	0.946749	3.80459	0.000142038	0.0283007	CDH20	Melanocyte	up
52.0672	-1.17497	0.313487	-3.74807	0.000178201	0.0316013	CCDC102B	Melanocyte	down
20.2387	-2.20188	0.484628	-4.54345	5.53408e-06	0.00406693	CPAMD8	Melanocyte	down
1546.7	-1.21915	0.311719	-3.91107	9.18889e-05	0.0243101	LINC00906	Melanocyte	down
3.83266	-2.98117	0.841129	-3.54424	0.000393742	0.0467822	TDRD12	Melanocyte	down
33.9671	1.57294	0.301873	5.21059	1.88245e-07	0.000466894	HPN-AS1	Melanocyte	up
52.2364	1.54955	0.441339	3.51101	0.000446407	0.0494838	FXYD3	Melanocyte	up
93.2032	1.37386	0.330235	4.16026	3.17888e-05	0.0143353	PPP1R15A	Melanocyte	up
11.0929	3.15664	0.553862	5.69933	1.20282e-08	7.95546e-05	ENSG00000289872	Melanocyte	up
41.0834	1.37337	0.307103	4.47203	7.74819e-06	0.00512465	MAFB	Melanocyte	up
64.1234	-1.79229	0.444743	-4.02995	5.57876e-05	0.0184489	ENSG00000286103	Melanocyte	down
2.93465	3.42372	0.928448	3.68757	0.000226407	0.0362288	ENTHD1	Melanocyte	up
12.5251	-1.32605	0.376103	-3.52577	0.000422246	0.0476034	PLCXD1	Melanocyte	down
11.6673	-1.70745	0.436963	-3.90754	9.32418e-05	0.0243435	FIRRE	Melanocyte	down
35.7768	-1.29863	0.334569	-3.8815	0.000103815	0.0251207	ENSG00000271254	Melanocyte	down
430.322	1.06018	0.197265	5.37439	7.68437e-08	0.000195072	ERRFI1	SchNmy	up
18.3247	1.46994	0.391606	3.75362	0.000174302	0.0356595	TNFRSF8	SchNmy	up
155.252	3.01786	0.614398	4.9119	9.01992e-07	0.00114488	ENSG00000290122	SchNmy	up
316.111	1.66516	0.341759	4.87234	1.10285e-06	0.00131162	ENSG00000225313	SchNmy	up
9.05384	-1.74284	0.463246	-3.76223	0.000168407	0.0352991	CYP4A22-AS1	SchNmy	down
762.091	-1.86999	0.444547	-4.20651	2.59342e-05	0.0117639	LRRC7	SchNmy	down
57.0389	1.95306	0.524414	3.72428	0.000195873	0.0366813	ENSG00000273338	SchNmy	up
22.0889	1.93609	0.528382	3.66419	0.000248119	0.0413779	ENSG00000288826	SchNmy	up
31.2746	1.70235	0.404826	4.20513	2.60936e-05	0.0117639	H3-7	SchNmy	up
35.3119	2.12433	0.509759	4.16731	3.08213e-05	0.0126249	H2BC18	SchNmy	up
96.9242	1.07401	0.295548	3.63395	0.00027911	0.0445933	ADAMTSL4	SchNmy	up
8.86224	4.03211	1.04905	3.84359	0.000121249	0.0271585	ENSG00000286581	SchNmy	up
8.84672	3.63203	0.871743	4.1664	3.09447e-05	0.0126249	ENSG00000270361	SchNmy	up
4.99006	2.79516	0.760832	3.67382	0.000238955	0.0407418	ENSG00000288835	SchNmy	up
10.3431	2.36405	0.641872	3.68305	0.000230459	0.0405023	ENSG00000236206	SchNmy	up
49.7524	1.34035	0.328546	4.07966	4.51023e-05	0.0153799	PACERR	SchNmy	up
33.7356	4.24552	1.09127	3.89043	0.000100067	0.0245832	LINC01353	SchNmy	up
18.2368	3.6587	0.800434	4.5709	4.8563e-06	0.00346725	ENSG00000288925	SchNmy	up
4.81223	3.74156	0.792707	4.71998	2.3587e-06	0.00207897	BTG2-DT	SchNmy	up
342.207	1.29201	0.356196	3.62725	0.000286457	0.0449647	BTG2	SchNmy	up
284.93	-1.3346	0.353158	-3.77903	0.000157438	0.0336167	SYT14	SchNmy	down
5.21286	3.55563	0.949914	3.74311	0.000181755	0.035939	LINC02771	SchNmy	up
560.954	1.70516	0.396155	4.30428	1.67527e-05	0.00869882	ATF3	SchNmy	up
41.4862	5.83947	1.36546	4.27655	1.89809e-05	0.00942731	ENSG00000289341	SchNmy	up
55.1834	1.89769	0.50566	3.75289	0.000174809	0.0356595	H2AC25	SchNmy	up
33.8866	2.43562	0.678151	3.59156	0.000328701	0.0486774	FOSL2-AS1	SchNmy	up
31.3204	1.50019	0.373338	4.01831	5.86158e-05	0.0173922	ENSG00000270640	SchNmy	up
153.224	-1.36962	0.368822	-3.71348	0.000204425	0.0372341	ATOH8	SchNmy	down
16.1793	3.52364	0.669653	5.26189	1.42581e-07	0.000325756	ENSG00000235480	SchNmy	up
17.7566	2.24552	0.536067	4.18888	2.8034e-05	0.0119646	IL1RL1	SchNmy	up
141.836	1.83954	0.444228	4.14098	3.45822e-05	0.0131683	CLASP1-AS1	SchNmy	up
40.6767	-1.83718	0.474107	-3.87503	0.000106609	0.025639	LYPD6B	SchNmy	down
14.5368	3.35938	0.710744	4.72657	2.28348e-06	0.00207897	ENSG00000288900	SchNmy	up
393.077	1.52409	0.398858	3.82115	0.000132833	0.0294643	HSPE1	SchNmy	up
1105.24	1.03758	0.264949	3.91613	8.99818e-05	0.0225914	ACKR3	SchNmy	up
458.955	1.2849	0.287381	4.47109	7.78219e-06	0.00494105	NFKBIZ	SchNmy	up
35.7851	-1.44049	0.357278	-4.03185	5.53406e-05	0.017201	KY	SchNmy	down
1123.23	1.93738	0.384496	5.03876	4.6856e-07	0.000705777	RARRES1	SchNmy	up
31.7893	1.57953	0.336001	4.70095	2.58948e-06	0.00207897	ENSG00000285938	SchNmy	up
82.9802	1.30576	0.334238	3.90669	9.357e-05	0.0232369	ENSG00000290021	SchNmy	up
49.2555	1.74389	0.382112	4.56382	5.02301e-06	0.0034776	ENSG00000289331	SchNmy	up
8.7361	1.90904	0.487147	3.91882	8.89837e-05	0.022589	GMNC	SchNmy	up
21.1207	-1.13774	0.309649	-3.67429	0.000238508	0.0407418	ENSG00000287031	SchNmy	down
15.7276	1.61296	0.36076	4.471	7.7856e-06	0.00494105	LINC02119	SchNmy	up
3.03783	4.32287	0.927812	4.65921	3.1743e-06	0.00233946	ISL1	SchNmy	up
115.532	1.35105	0.336848	4.01086	6.04985e-05	0.0174648	ENSG00000249236	SchNmy	up
58.964	-1.49444	0.379051	-3.9426	8.06028e-05	0.0213135	C5orf67	SchNmy	down
73.8351	1.87698	0.508753	3.68937	0.00022481	0.0398158	LUCAT1	SchNmy	up
65.7342	1.44289	0.307187	4.6971	2.63886e-06	0.00207897	GLRX	SchNmy	up
23.0147	-1.33228	0.36069	-3.69369	0.000221023	0.0394509	DND1	SchNmy	down
7.82319	4.41099	1.08593	4.06196	4.86629e-05	0.0161131	ENSG00000288892	SchNmy	up
78.443	3.04116	0.63544	4.78591	1.70216e-06	0.0017677	ENSG00000253736	SchNmy	up
695.724	1.62598	0.441751	3.68077	0.000232535	0.0405552	DUSP1	SchNmy	up
7.9011	4.47008	0.828808	5.39339	6.91409e-08	0.000195072	ENSG00000288737	SchNmy	up
145.413	2.00317	0.528063	3.79343	0.00014858	0.0323296	H2BC4	SchNmy	up
593.298	2.11492	0.550202	3.84389	0.000121097	0.0271585	H2AC6	SchNmy	up
17.0627	2.43478	0.590529	4.12306	3.73878e-05	0.0135285	H3C6	SchNmy	up
10.7981	2.25888	0.554849	4.07117	4.67782e-05	0.0157168	H2BC11	SchNmy	up
677.237	1.956	0.485788	4.02644	5.6627e-05	0.017201	HSPA1A	SchNmy	up
518.285	2.10432	0.4143	5.07921	3.79002e-07	0.000618504	HSPA1B	SchNmy	up
18.4205	1.4803	0.408592	3.62294	0.000291276	0.0449647	PXT1	SchNmy	up
28.9313	-1.16766	0.27833	-4.19525	2.72574e-05	0.0119646	PKHD1	SchNmy	down
354.908	-1.28379	0.343601	-3.73627	0.000186768	0.0361618	PKIB	SchNmy	down
28.5347	2.91648	0.590146	4.94196	7.73414e-07	0.00103942	ENSG00000289312	SchNmy	up
66.8588	-1.38607	0.294937	-4.69955	2.60738e-06	0.00207897	ENSG00000231863	SchNmy	down
815.906	-1.25793	0.292751	-4.29693	1.73181e-05	0.00879259	COL28A1	SchNmy	down
1349.55	-1.43929	0.301297	-4.77696	1.77965e-06	0.00176781	DGKB	SchNmy	down
8.14695	-5.07001	0.724134	-7.00148	2.53271e-12	2.89324e-08	LINC01446	SchNmy	down
8.3114	2.35407	0.589906	3.99059	6.59082e-05	0.0185007	ENSG00000273320	SchNmy	up
353.342	1.83895	0.478428	3.84375	0.00012117	0.0271585	SULF1	SchNmy	up
76.3314	-1.26259	0.328221	-3.84676	0.000119689	0.0271585	ENSG00000253553	SchNmy	down
22.0558	1.70883	0.394491	4.33175	1.47931e-05	0.00819761	TRIB1	SchNmy	up
11.8091	2.50547	0.651739	3.84428	0.000120905	0.0271585	ENSG00000288865	SchNmy	up
100.266	1.03465	0.281305	3.67804	0.000235029	0.0406796	S1PR3	SchNmy	up
10.6487	2.02721	0.541093	3.74652	0.000179308	0.035939	ENSG00000289123	SchNmy	up
270.716	1.97356	0.531619	3.71235	0.000205344	0.0372341	NFIL3	SchNmy	up
16.3753	-1.81959	0.361854	-5.02853	4.94263e-07	0.000705777	ENSG00000275465	SchNmy	down
24.0465	2.64368	0.610878	4.32767	1.50698e-05	0.00819761	ENSG00000236892	SchNmy	up
283.218	4.4215	0.819411	5.39595	6.81626e-08	0.000195072	ENSG00000288755	SchNmy	up
75.0829	1.24307	0.276498	4.49577	6.93188e-06	0.00465802	ITGB1-DT	SchNmy	up
165.834	1.39455	0.346444	4.02532	5.68982e-05	0.017201	SRGN	SchNmy	up
179.576	1.26003	0.338646	3.72079	0.000198604	0.0368903	PAPSS2	SchNmy	up
157.57	1.27486	0.331413	3.84672	0.000119709	0.0271585	BAG3	SchNmy	up
3.81788	-2.59061	0.715012	-3.62317	0.000291009	0.0449647	SYCE1	SchNmy	down
11.6293	2.30524	0.572873	4.024	5.72189e-05	0.017201	ENSG00000288528	SchNmy	up
5.70957	2.97281	0.717283	4.14454	3.40489e-05	0.0131683	ENSG00000224077	SchNmy	up
76.8374	1.64276	0.390472	4.20711	2.5866e-05	0.0117639	ENSG00000286044	SchNmy	up
636.223	1.12085	0.279633	4.00831	6.11538e-05	0.0174648	GABARAPL1	SchNmy	up
8.11186	-2.03014	0.560306	-3.62327	0.000290898	0.0449647	SLCO1A2	SchNmy	down
24.0318	4.07602	0.78735	5.17688	2.2563e-07	0.00042958	ETNK1-DT	SchNmy	up
11.8338	3.79053	0.919116	4.1241	3.7218e-05	0.0135285	ENSG00000289928	SchNmy	up
28.6705	1.79589	0.498157	3.60506	0.00031208	0.0472191	ENSG00000270175	SchNmy	up
62.183	-1.16463	0.261009	-4.46203	8.11871e-06	0.00501319	HMGA2	SchNmy	down
13.5324	-1.94836	0.461576	-4.22109	2.43119e-05	0.0117639	LINC02408	SchNmy	down
384.337	-1.86741	0.520373	-3.5886	0.000332452	0.0486893	MGAT4C	SchNmy	down
28.0247	1.71672	0.470764	3.64666	0.000265672	0.0433558	TBX5	SchNmy	up
1358.91	-1.00639	0.268936	-3.74212	0.000182472	0.035939	DLEU1	SchNmy	down
3.53305	4.79802	1.14596	4.1869	2.82789e-05	0.0119646	NUBPL-DT	SchNmy	up
8.3273	-1.92324	0.532225	-3.61358	0.000301994	0.0463064	ENSG00000287492	SchNmy	down
4.65979	-2.51663	0.700942	-3.59035	0.00033024	0.0486774	ENSG00000287973	SchNmy	down
67.379	-1.10209	0.295674	-3.7274	0.000193469	0.0366813	PATL2	SchNmy	down
11.6054	-1.61721	0.426888	-3.78838	0.000151633	0.0326826	DUOX2	SchNmy	down
8.56621	1.73603	0.472973	3.67047	0.000242106	0.0409734	VPS13C-DT	SchNmy	up
10.0512	2.60421	0.71526	3.64093	0.000271659	0.0437084	C2CD4A	SchNmy	up
9.14833	2.69628	0.676447	3.98595	6.72107e-05	0.0185007	ENSG00000289200	SchNmy	up
37.8946	3.27536	0.568808	5.7583	8.49675e-09	3.23542e-05	ENSG00000288872	SchNmy	up
74.2829	3.31305	0.545787	6.07023	1.27727e-09	9.70049e-06	SDR42E2	SchNmy	up
11.8078	2.945	0.73884	3.98597	6.72041e-05	0.0185007	ENSG00000260823	SchNmy	up
6.39211	2.93276	0.724418	4.04843	5.15623e-05	0.0168292	ENSG00000287644	SchNmy	up
43.5306	-1.57333	0.30382	-5.1785	2.23677e-07	0.00042958	KANSL1-AS1	SchNmy	down
424.223	-1.95458	0.443168	-4.41048	1.03142e-05	0.00604227	ARL17B	SchNmy	down
52.1101	-1.93266	0.446564	-4.32786	1.50568e-05	0.00819761	ENSG00000290457	SchNmy	down
725.39	1.54963	0.425441	3.64242	0.000270091	0.0437084	GADD45B	SchNmy	up
18.0309	2.03987	0.544692	3.74499	0.000180401	0.035939	ENSG00000267299	SchNmy	up
6.73114	2.14379	0.578211	3.70763	0.00020921	0.0376364	ZNF878	SchNmy	up
514.903	1.62006	0.407415	3.97645	6.99531e-05	0.0190264	JUNB	SchNmy	up
28.2797	-1.95718	0.336017	-5.82464	5.72344e-09	2.61527e-05	CPAMD8	SchNmy	down
6.04241	-3.56777	0.740508	-4.81801	1.44998e-06	0.00157751	ENSG00000284797	SchNmy	down
204.308	-1.2818	0.330337	-3.88029	0.000104332	0.0253583	IQCN	SchNmy	down
16.2615	1.32334	0.369142	3.5849	0.000337206	0.0490709	GDF15	SchNmy	up
21.1012	1.06378	0.281714	3.77611	0.000159297	0.0336986	ENSG00000267375	SchNmy	up
40.2191	1.33769	0.372398	3.5921	0.000328028	0.0486774	SERTAD1	SchNmy	up
375.322	1.18998	0.302189	3.93788	8.22037e-05	0.0213421	PPP1R15A	SchNmy	up
13.2157	-1.79502	0.453774	-3.95576	7.62921e-05	0.0205064	LAMP5	SchNmy	down
12.1239	1.37614	0.327364	4.20369	2.62598e-05	0.0117639	SNAP25-AS1	SchNmy	up
53.5868	1.20685	0.292255	4.12946	3.63621e-05	0.0135285	SNAP25	SchNmy	up
50.2067	3.40317	0.564906	6.02431	1.69834e-09	9.70049e-06	ENSG00000289872	SchNmy	up
6.29987	2.32945	0.559821	4.16106	3.16781e-05	0.0126973	LINC01271	SchNmy	up
48.2587	1.42992	0.353818	4.0414	5.31335e-05	0.0170978	SAMSN1	SchNmy	up
13.0365	-2.7761	0.704424	-3.94095	8.11604e-05	0.0213135	ENSG00000234083	SchNmy	down
339.727	1.75535	0.201466	8.71287	2.96287e-18	6.76926e-14	ETS2	SchNmy	up
103.905	1.00541	0.215201	4.67197	2.9832e-06	0.0022719	PIGA	SchNmy	up
44.5298	-1.17469	0.283013	-4.15066	3.31515e-05	0.0130588	PCYT1B	SchNmy	down
123.032	1.41244	0.290363	4.86438	1.14818e-06	0.00131162	MIR222HG	SchNmy	up
4.03201	3.02486	0.840566	3.5986	0.000319937	0.0480894	ENSG00000289365	SchNmy	up
25.5042	-1.18479	0.306607	-3.86421	0.000111451	0.0265242	ENSG00000238039	SchNmy	down
579.168	-1.55461	0.418183	-3.71752	0.000201185	0.0370684	ENSG00000273748	SchNmy	down
26.6887	1.18692	0.260804	4.55102	5.33868e-06	0.0201607	MAT2A	Schmy	up
14.1404	-2.80572	0.678387	-4.13587	3.53607e-05	0.0442538	TMEFF2	Schmy	down
36.4705	-1.51723	0.30536	-4.96868	6.74114e-07	0.00629623	MAP2	Schmy	down
23.7518	1.43731	0.341358	4.21057	2.54729e-05	0.0442538	MED12L	Schmy	up
18.7643	1.51481	0.33586	4.51023	6.47559e-06	0.0201607	PPARGC1A	Schmy	up
60.2525	2.74474	0.657292	4.17584	2.96893e-05	0.0442538	FSTL5	Schmy	up
13.8047	2.19636	0.535191	4.10387	4.06291e-05	0.0442538	SLC27A6	Schmy	up
42.7792	1.17011	0.285903	4.09267	4.26429e-05	0.0442538	CLEC16A	Schmy	up
12.6697	1.95767	0.448082	4.36899	1.2482e-05	0.0291456	GPT2	Schmy	up
24.5509	2.09726	0.4462	4.70026	2.59826e-06	0.0410889	HSPA1B	T/NK cell	up
25.838	-1.37869	0.304421	-4.52889	5.92933e-06	0.0468832	CENPP	T/NK cell	down
92.8293	-1.0918	0.304983	-3.57988	0.000343757	0.0298118	PIK3CD	TM-BeamA	down
244.389	1.06832	0.276612	3.86216	0.000112391	0.0147454	SNHG3	TM-BeamA	up
654.69	1.3771	0.346463	3.97474	7.04558e-05	0.0109008	ENSG00000225313	TM-BeamA	up
28.4145	1.0704	0.313937	3.40962	0.000650537	0.0424718	SLFNL1	TM-BeamA	up
65.6119	5.58009	1.21192	4.60433	4.13795e-06	0.0023848	ENSG00000287400	TM-BeamA	up
686.246	1.76441	0.446498	3.95165	7.76142e-05	0.0117713	CTH	TM-BeamA	up
7.04277	-1.68372	0.470498	-3.57858	0.000345463	0.0298118	ENSG00000228084	TM-BeamA	down
20.9464	1.34062	0.398869	3.36105	0.000776476	0.0463733	ENSG00000288826	TM-BeamA	up
113.521	1.34831	0.278532	4.84077	1.29337e-06	0.00099387	TAF13	TM-BeamA	up
33.5303	-1.17267	0.293602	-3.99408	6.49462e-05	0.010529	TRIM45	TM-BeamA	down
28.7719	-1.14836	0.323596	-3.54873	0.000387096	0.0313113	SLC27A3	TM-BeamA	down
11.8701	-1.86362	0.549705	-3.39022	0.000698363	0.0432235	ASTN1	TM-BeamA	down
5.0099	-1.96039	0.582922	-3.36304	0.000770904	0.046331	ZNF648	TM-BeamA	down
7.40893	2.65192	0.69281	3.82777	0.000129309	0.0160267	ENSG00000288925	TM-BeamA	up
10.4273	-1.38613	0.416024	-3.33186	0.000862691	0.0491052	REN	TM-BeamA	down
11.1724	-2.14735	0.467502	-4.59323	4.36438e-06	0.00239553	KLHDC8A	TM-BeamA	down
9.89352	4.19792	0.776821	5.40397	6.51816e-08	0.000107331	DYRK3-AS1	TM-BeamA	up
22.5681	1.18664	0.304658	3.89498	9.82054e-05	0.0136381	ENSG00000288999	TM-BeamA	up
16.2678	-1.86073	0.540673	-3.44151	0.000578481	0.0396897	ENSG00000287315	TM-BeamA	down
43.5981	1.43124	0.39376	3.63481	0.000278184	0.0264999	AGT	TM-BeamA	up
34.8983	3.18974	0.617188	5.16818	2.36384e-07	0.000327018	ENSG00000288760	TM-BeamA	up
30.1191	-1.02851	0.296249	-3.47178	0.000517023	0.0373856	WDR64	TM-BeamA	down
14.0593	-1.45637	0.397628	-3.66263	0.000249634	0.0253914	LINC02897	TM-BeamA	down
385.505	1.43388	0.412803	3.47352	0.000513677	0.0373856	ID2	TM-BeamA	up
1099.16	2.30056	0.575637	3.99655	6.42728e-05	0.0105084	ENSG00000225649	TM-BeamA	up
38.7591	-1.00334	0.283182	-3.54311	0.000395444	0.0316534	KCNS3	TM-BeamA	down
90.4609	-1.33379	0.341155	-3.90964	9.24353e-05	0.013402	LINC00954	TM-BeamA	down
40.2415	-1.51404	0.325946	-4.64507	3.39968e-06	0.00211818	KIF3C	TM-BeamA	down
14.0506	-1.22352	0.360716	-3.39193	0.000694029	0.0432235	ENSG00000286415	TM-BeamA	down
1469.45	-1.59202	0.365594	-4.35461	1.33302e-05	0.00487779	VIT	TM-BeamA	down
24.1957	-1.27824	0.377163	-3.3891	0.000701236	0.0432235	ANKRD53	TM-BeamA	down
3.15187	3.01018	0.77624	3.8779	0.000105361	0.0142851	ENSG00000279070	TM-BeamA	up
48.7181	2.12236	0.638125	3.32594	0.000881222	0.0496695	SH2D6	TM-BeamA	up
282.651	3.99625	0.946776	4.2209	2.43331e-05	0.00648134	IL1RL1	TM-BeamA	up
179.334	-1.48494	0.382558	-3.88159	0.000103774	0.0142399	PANTR1	TM-BeamA	down
86.7915	-1.23435	0.362575	-3.40441	0.00066306	0.0428057	POU3F3	TM-BeamA	down
29.2805	-2.85405	0.683181	-4.17759	2.94609e-05	0.00681573	ST6GAL2	TM-BeamA	down
7.21383	-2.06827	0.608548	-3.3987	0.000677067	0.0429984	TMEM37	TM-BeamA	down
3.70021	-2.61841	0.720209	-3.63562	0.00027731	0.0264999	NXPH2	TM-BeamA	down
95.7756	-2.02938	0.526738	-3.85273	0.000116807	0.0150433	LYPD6B	TM-BeamA	down
1082.25	-1.13687	0.334857	-3.39509	0.000686053	0.0432235	KCNJ3	TM-BeamA	down
16.8187	-1.02383	0.26585	-3.85116	0.000117562	0.0150564	SCN1A-AS1	TM-BeamA	down
193.342	-1.48573	0.355905	-4.17452	2.98611e-05	0.00681573	NOSTRIN	TM-BeamA	down
17.2722	2.91431	0.479136	6.08242	1.18379e-09	5.458e-06	ENSG00000288900	TM-BeamA	up
40.6956	-1.63804	0.405793	-4.03663	5.42235e-05	0.00976574	CAVIN2-AS1	TM-BeamA	down
628.447	-1.56182	0.406801	-3.83926	0.000123404	0.0155074	TMEFF2	TM-BeamA	down
518.844	1.44576	0.355749	4.06399	4.82418e-05	0.0089687	HSPE1	TM-BeamA	up
82.1849	-1.59113	0.436392	-3.6461	0.000266252	0.0264999	LINC00607	TM-BeamA	down
7.88938	-1.69754	0.480707	-3.53134	0.000413464	0.0326425	RPL37A-DT	TM-BeamA	down
17.8808	1.43143	0.408735	3.50211	0.000461592	0.0351191	ENSG00000288819	TM-BeamA	up
61.5484	-1.18118	0.343719	-3.43647	0.000589352	0.0399136	PRRT3-AS1	TM-BeamA	down
55.6287	-2.80001	0.588998	-4.75385	1.99581e-06	0.00143779	SLC6A11	TM-BeamA	down
62.8067	-1.83483	0.432599	-4.24141	2.22115e-05	0.00624442	SLC6A1	TM-BeamA	down
77.8912	-1.23892	0.309555	-4.00228	6.27359e-05	0.0104801	ENSG00000290046	TM-BeamA	down
56.318	-1.79045	0.388665	-4.60666	4.09182e-06	0.0023848	SLC6A20	TM-BeamA	down
83.0509	-1.41618	0.374823	-3.77827	0.000157922	0.0180226	COL7A1	TM-BeamA	down
7.02298	-2.16431	0.512177	-4.22571	2.38184e-05	0.00645982	ENSG00000228008	TM-BeamA	down
11.4292	1.13319	0.337287	3.35973	0.000780186	0.0464745	LINC02019	TM-BeamA	up
4.49316	-3.02849	0.893139	-3.39084	0.000696775	0.0432235	ENSG00000287595	TM-BeamA	down
239.86	-1.24071	0.308694	-4.01921	5.83933e-05	0.0100458	LINC02018	TM-BeamA	down
49.8752	-1.8772	0.466897	-4.02059	5.80524e-05	0.0100458	ST3GAL6-AS1	TM-BeamA	down
4.85825	-2.39044	0.637731	-3.74836	0.000177994	0.0198227	ENSG00000286956	TM-BeamA	down
19.4788	-1.68874	0.39755	-4.24787	2.15816e-05	0.00624442	COL6A6	TM-BeamA	down
34.444	-1.71393	0.378923	-4.52315	6.0926e-06	0.0029261	LINC02006	TM-BeamA	down
2010.7	1.85963	0.282171	6.59044	4.38522e-11	5.05463e-07	LXN	TM-BeamA	up
47.2035	1.84458	0.485993	3.79549	0.000147354	0.0173314	ENSG00000272087	TM-BeamA	up
32753.8	1.96256	0.420079	4.67187	2.98473e-06	0.00195063	RARRES1	TM-BeamA	up
21.5474	-1.59337	0.340123	-4.6847	2.80365e-06	0.00190096	BCHE	TM-BeamA	down
314.669	-1.24683	0.342999	-3.6351	0.000277873	0.0264999	MCF2L2	TM-BeamA	down
134.496	-1.04713	0.309152	-3.3871	0.000706347	0.0434192	TNK2	TM-BeamA	down
15.441	-1.59678	0.402191	-3.9702	7.18129e-05	0.0110367	TM4SF19-AS1	TM-BeamA	down
17.1493	-1.39279	0.320891	-4.34039	1.4223e-05	0.00497428	MYL5	TM-BeamA	down
71.7217	-2.45851	0.689824	-3.56397	0.000365292	0.0302916	CYTL1	TM-BeamA	down
18.6923	-1.91237	0.516973	-3.69918	0.000216301	0.0228622	LINC01182	TM-BeamA	down
254.772	-1.29489	0.369086	-3.50836	0.000450886	0.0346476	BST1	TM-BeamA	down
2254.93	-1.59624	0.394929	-4.04183	5.30346e-05	0.00970322	LDB2	TM-BeamA	down
14.9658	-1.31326	0.365285	-3.59516	0.000324192	0.0285912	ENSG00000250092	TM-BeamA	down
19.6944	-3.06102	0.705054	-4.34154	1.41485e-05	0.00497428	ENSG00000250064	TM-BeamA	down
83.2773	1.55582	0.468096	3.32372	0.000888249	0.0499134	ADH4	TM-BeamA	up
556.523	-1.2239	0.290043	-4.21973	2.446e-05	0.00648134	DKK2	TM-BeamA	down
103.917	-1.48844	0.351237	-4.23769	2.2583e-05	0.00624622	LINC02945	TM-BeamA	down
1516.14	-1.49056	0.442985	-3.36481	0.000765963	0.0462245	LINC02511	TM-BeamA	down
22.7272	-1.73533	0.507996	-3.41603	0.000635423	0.0418526	LINC02100	TM-BeamA	down
160.117	-2.05624	0.459156	-4.47831	7.52352e-06	0.00333538	CDH18	TM-BeamA	down
15.3008	-1.5157	0.360989	-4.19873	2.68411e-05	0.00665341	ANKRD55	TM-BeamA	down
10.24	-1.74365	0.488884	-3.5666	0.000361638	0.0301937	LNCBRM	TM-BeamA	down
376.524	1.13158	0.327396	3.45631	0.000547617	0.0384885	GLRX	TM-BeamA	up
113.835	-1.31388	0.362065	-3.62886	0.000284676	0.0266774	STK32A-AS1	TM-BeamA	down
5.88425	-2.48748	0.524919	-4.73879	2.14995e-06	0.0015019	SH3TC2-DT	TM-BeamA	down
1619.71	-2.39162	0.429136	-5.57311	2.50227e-08	4.75083e-05	KCNIP1	TM-BeamA	down
10.6567	1.99507	0.574532	3.47251	0.000515617	0.0373856	ENSG00000288737	TM-BeamA	up
38.7659	1.77296	0.492793	3.59777	0.000320954	0.0284575	LINC02521	TM-BeamA	up
4.01853	-2.84415	0.722269	-3.93781	8.22299e-05	0.0123094	SLC17A1	TM-BeamA	down
691.371	2.28366	0.512325	4.45745	8.294e-06	0.00360758	HSPA1B	TM-BeamA	up
10.1615	-1.78266	0.529148	-3.36893	0.000754595	0.0457781	SLC44A4	TM-BeamA	down
8.44356	-1.5176	0.412795	-3.67639	0.000236554	0.024345	PACSIN1	TM-BeamA	down
17.3379	-2.43766	0.479251	-5.08639	3.64946e-07	0.000350546	LRFN2	TM-BeamA	down
998.264	-1.01474	0.242349	-4.18712	2.82519e-05	0.00677232	CCND3	TM-BeamA	down
61.0406	-1.5763	0.470999	-3.34671	0.000817753	0.0478468	ENSG00000286417	TM-BeamA	down
616.142	-1.77324	0.461958	-3.83853	0.000123774	0.0155074	TFAP2B	TM-BeamA	down
208.728	-1.96627	0.493207	-3.9867	6.69988e-05	0.0106519	RIMS1	TM-BeamA	down
21.3129	-1.12649	0.309739	-3.63689	0.000275945	0.0264999	EEF1A1-AS1	TM-BeamA	down
129.588	-1.49358	0.417745	-3.57534	0.000349774	0.0298642	ENSG00000287683	TM-BeamA	down
12.4641	-1.65025	0.467583	-3.52931	0.000416645	0.0327813	ENSG00000288085	TM-BeamA	down
56.8392	-1.06291	0.266726	-3.98502	6.74731e-05	0.0106538	BVES-AS1	TM-BeamA	down
377.578	-1.31534	0.254691	-5.16445	2.41153e-07	0.000327018	LINC01013	TM-BeamA	down
24.3562	3.19133	0.572802	5.57143	2.5265e-08	4.75083e-05	ENSG00000289312	TM-BeamA	up
828.852	-1.02543	0.262602	-3.9049	9.42637e-05	0.013414	ENSG00000227681	TM-BeamA	down
170.342	-1.30106	0.382592	-3.40065	0.000672267	0.0429689	SYTL3	TM-BeamA	down
10.6324	3.35399	0.603104	5.56121	2.67908e-08	4.75083e-05	ENSG00000236627	TM-BeamA	up
6.93006	2.51207	0.650785	3.86006	0.00011336	0.0147643	ENSG00000232640	TM-BeamA	up
538.391	-1.31263	0.387088	-3.39104	0.00069628	0.0432235	ENSG00000229618	TM-BeamA	down
9.06733	-2.49288	0.584097	-4.26791	1.97311e-05	0.00623098	ENSG00000260951	TM-BeamA	down
41.3901	-1.76929	0.439845	-4.02254	5.75727e-05	0.0100458	LINC03007	TM-BeamA	down
2432.15	2.25099	0.676218	3.32879	0.000872239	0.0494047	TAC1	TM-BeamA	up
9.66987	-1.30127	0.357021	-3.6448	0.000267601	0.0264999	ENSG00000242798	TM-BeamA	down
336.911	-1.1698	0.300217	-3.89652	9.75857e-05	0.0136342	CDHR3	TM-BeamA	down
78.5933	-1.41913	0.355723	-3.98941	6.62373e-05	0.0106039	ENSG00000237813	TM-BeamA	down
9.28237	2.79782	0.714945	3.91334	9.10271e-05	0.0133659	ENSG00000083622	TM-BeamA	up
97.7765	1.04075	0.254022	4.09709	4.18382e-05	0.0081737	STRIP2	TM-BeamA	up
50.8502	-1.55695	0.401013	-3.88254	0.000103372	0.0142399	AGK-DT	TM-BeamA	down
268.93	-1.27878	0.33183	-3.85372	0.000116338	0.0150433	RNF32-DT	TM-BeamA	down
3.93309	-3.44804	0.951413	-3.62412	0.000289945	0.0269	ENSG00000253184	TM-BeamA	down
214.656	2.08827	0.505033	4.13491	3.55094e-05	0.00750724	ADAM7-AS1	TM-BeamA	up
66.1223	-1.73236	0.329398	-5.25918	1.447e-07	0.000222385	ENSG00000253608	TM-BeamA	down
6.28521	-2.63944	0.515608	-5.11909	3.07011e-07	0.000350546	LINC02847	TM-BeamA	down
23.1306	-1.26971	0.373472	-3.39975	0.000674471	0.0429689	MCMDC2	TM-BeamA	down
4.2389	3.49048	0.929545	3.75505	0.000173309	0.0194081	ENSG00000286113	TM-BeamA	up
44.2815	3.56924	1.01731	3.50851	0.000450629	0.0346476	PI15	TM-BeamA	up
270.553	-1.03537	0.269071	-3.84794	0.000119115	0.015171	MATN2	TM-BeamA	down
24.6887	1.55888	0.44936	3.46911	0.000522195	0.0373856	DPYS	TM-BeamA	up
18.8913	-1.78728	0.443958	-4.02579	5.6785e-05	0.0100458	ENSG00000254812	TM-BeamA	down
5.28363	2.09771	0.54292	3.86376	0.000111657	0.0147454	GLIS3-AS2	TM-BeamA	up
1198.91	2.03566	0.59807	3.40372	0.000664749	0.0428057	SLC1A1	TM-BeamA	up
59.8758	-1.28952	0.303936	-4.24272	2.2083e-05	0.00624442	ENTREP1	TM-BeamA	down
137.856	-1.69056	0.465653	-3.63052	0.000282849	0.0266144	ENSG00000290551	TM-BeamA	down
95.1639	-1.45892	0.372083	-3.92095	8.82017e-05	0.0131182	GAS1RR	TM-BeamA	down
20.4998	2.94609	0.579073	5.0876	3.62623e-07	0.000350546	ENSG00000289123	TM-BeamA	up
3.16879	4.49376	1.33678	3.36162	0.000774863	0.0463733	ENSG00000233081	TM-BeamA	up
36.8346	-1.11189	0.272149	-4.08561	4.39612e-05	0.00841021	ENSG00000228142	TM-BeamA	down
4.78798	-2.27	0.549252	-4.1329	3.58216e-05	0.00750724	ENSG00000268926	TM-BeamA	down
24.6417	-1.17945	0.344489	-3.42376	0.000617617	0.0410885	CORO2A	TM-BeamA	down
7.90043	-2.19038	0.546315	-4.00937	6.08813e-05	0.0102445	PLPPR1	TM-BeamA	down
118.93	1.36387	0.358887	3.80029	0.000144526	0.0172629	IER5L	TM-BeamA	up
13.4232	-1.2768	0.320853	-3.97939	6.90925e-05	0.0108353	STKLD1	TM-BeamA	down
42.6093	-1.4704	0.345063	-4.26124	2.03294e-05	0.00624442	PPP1R26-AS1	TM-BeamA	down
29.0585	-1.20531	0.314145	-3.8368	0.000124646	0.0155322	ENSG00000205740	TM-BeamA	down
53.2555	1.45168	0.328219	4.4229	9.73866e-06	0.00393869	PITRM1-AS1	TM-BeamA	up
221.758	3.06206	0.614106	4.98621	6.15737e-07	0.00050695	ENSG00000288755	TM-BeamA	up
19.5477	1.03985	0.291437	3.56802	0.000359683	0.0301937	ENSG00000213994	TM-BeamA	up
16.476	1.49272	0.394532	3.78352	0.000154626	0.0180029	LINC00840	TM-BeamA	up
226.096	-1.50606	0.398608	-3.77829	0.00015791	0.0180226	PCDH15	TM-BeamA	down
9.8336	2.2314	0.59258	3.76557	0.000166167	0.0188702	JMJD1C-AS1	TM-BeamA	up
552.332	-1.44603	0.282378	-5.1209	3.04077e-07	0.000350546	CDH23	TM-BeamA	down
129.468	-1.02312	0.225518	-4.53678	5.71188e-06	0.00280162	ZNF503-AS1	TM-BeamA	down
215.154	-1.43424	0.319915	-4.48321	7.35288e-06	0.00332365	ENSG00000270087	TM-BeamA	down
42.9765	-1.24827	0.367419	-3.39739	0.000680317	0.0430861	BLNK	TM-BeamA	down
10.8754	-1.73657	0.402381	-4.31575	1.5906e-05	0.00534757	PDZD7	TM-BeamA	down
7.03407	-1.51078	0.435473	-3.46928	0.00052186	0.0373856	ENSG00000234699	TM-BeamA	down
45.4953	-1.41748	0.418182	-3.38963	0.000699866	0.0432235	SORCS3	TM-BeamA	down
258.683	-1.34148	0.323655	-4.14478	3.40145e-05	0.00746796	ADD3-AS1	TM-BeamA	down
19.7706	-1.8572	0.434799	-4.2714	1.94246e-05	0.00621939	ENSG00000227307	TM-BeamA	down
16.7768	-1.43664	0.405207	-3.54544	0.000391959	0.0314837	EDRF1-DT	TM-BeamA	down
357.304	-1.67349	0.40082	-4.17518	2.9775e-05	0.00681573	ADAM12	TM-BeamA	down
10.2078	-1.59023	0.379969	-4.18517	2.84959e-05	0.00677232	NLRP14	TM-BeamA	down
4.45492	-2.85336	0.714635	-3.99275	6.53123e-05	0.010529	ENSG00000287373	TM-BeamA	down
96.6594	2.52719	0.621143	4.0686	4.7296e-05	0.00886435	FJX1	TM-BeamA	up
11.7404	-1.23351	0.341795	-3.60893	0.000307467	0.028016	RAG1	TM-BeamA	down
4.52775	1.95635	0.565227	3.46118	0.000537805	0.0380308	ENSG00000254653	TM-BeamA	up
5.53551	-2.01724	0.580933	-3.47242	0.000515789	0.0373856	ENSG00000255240	TM-BeamA	down
60.1092	1.03283	0.251802	4.10174	4.10057e-05	0.0081737	ASRGL1	TM-BeamA	up
140.18	1.20338	0.290033	4.14909	3.33795e-05	0.00739901	CSKMT	TM-BeamA	up
6.1399	-2.0551	0.593157	-3.46469	0.000530846	0.0376541	ENSG00000257002	TM-BeamA	down
17.0327	-1.40543	0.416366	-3.37546	0.000736917	0.0448236	TESMIN	TM-BeamA	down
7.99125	-2.16347	0.575571	-3.75882	0.000170716	0.0192917	LINC02720	TM-BeamA	down
140.978	-2.52643	0.450537	-5.60758	2.05171e-08	4.75083e-05	MIR4300HG	TM-BeamA	down
10.2477	-2.84815	0.792352	-3.59456	0.000324943	0.0285912	TMEM123-DT	TM-BeamA	down
1769.13	-1.83964	0.54395	-3.382	0.000719596	0.0440023	GRIA4	TM-BeamA	down
54.7344	1.19982	0.337611	3.55385	0.000379631	0.0310252	ENSG00000286044	TM-BeamA	up
5.7723	2.67646	0.635937	4.2087	2.56849e-05	0.00657906	ENSG00000290063	TM-BeamA	up
296.742	-1.88617	0.451565	-4.17697	2.95421e-05	0.00681573	SLCO1C1	TM-BeamA	down
9.73689	2.99702	0.650094	4.61013	4.02417e-06	0.0023848	ENSG00000289928	TM-BeamA	up
24.6882	-1.34096	0.349137	-3.8408	0.000122636	0.0155074	LINC02422	TM-BeamA	down
43.0128	-2.70427	0.529955	-5.10283	3.34616e-07	0.000350546	ENSG00000257239	TM-BeamA	down
32.4188	-2.32265	0.465726	-4.98716	6.12733e-07	0.00050695	GALNT6	TM-BeamA	down
27.9505	-1.48987	0.421849	-3.53176	0.000412801	0.0326425	HMGA2-AS1	TM-BeamA	down
37.8241	-2.08237	0.531416	-3.91853	8.90907e-05	0.0131654	LINC01479	TM-BeamA	down
184.059	-1.80328	0.42148	-4.27844	1.88204e-05	0.0061108	IFNG-AS1	TM-BeamA	down
2161.51	-1.3457	0.377199	-3.56762	0.000360237	0.0301937	NAV3	TM-BeamA	down
3.78688	-2.5643	0.739728	-3.46654	0.0005272	0.037511	ENSG00000289174	TM-BeamA	down
7.81535	2.18014	0.591455	3.68606	0.000227751	0.0236502	ENSG00000258272	TM-BeamA	up
166.82	-2.31612	0.550202	-4.20958	2.55844e-05	0.00657906	RMST	TM-BeamA	down
9.74355	1.87012	0.510519	3.66318	0.000249103	0.0253914	SDS	TM-BeamA	up
83.1227	-1.26329	0.363018	-3.47995	0.000501499	0.0369363	P2RX7	TM-BeamA	down
107.796	-1.43449	0.367263	-3.90589	9.38783e-05	0.013414	RIMBP2	TM-BeamA	down
54.9579	2.39723	0.682436	3.51275	0.000443491	0.0344236	TEX26-AS1	TM-BeamA	up
588.086	1.06772	0.316319	3.37546	0.000736911	0.0448236	HSPH1	TM-BeamA	up
20.5282	-1.76635	0.420654	-4.19905	2.68032e-05	0.00665341	HTR2A	TM-BeamA	down
9.01588	-1.3301	0.350178	-3.79835	0.000145665	0.0173093	ENSG00000290490	TM-BeamA	down
15.1279	-1.58431	0.383226	-4.13414	3.56289e-05	0.00750724	ENSG00000291255	TM-BeamA	down
363.363	-1.06923	0.28161	-3.79686	0.000146543	0.0173244	CLYBL	TM-BeamA	down
25.5937	1.56243	0.352016	4.43852	9.05782e-06	0.00372875	GAS6-DT	TM-BeamA	up
16.2364	-1.14838	0.333385	-3.44462	0.000571861	0.0394704	KLHL33	TM-BeamA	down
36.5874	1.61618	0.388286	4.16235	3.1499e-05	0.00711907	PNP	TM-BeamA	up
39.3786	-1.38447	0.405541	-3.41389	0.000640414	0.0420612	AJUBA-DT	TM-BeamA	down
42.4669	-1.14795	0.288684	-3.97649	6.99399e-05	0.0108941	ENSG00000258744	TM-BeamA	down
8.51234	-2.2057	0.496577	-4.4418	8.92106e-06	0.00372875	LINC00648	TM-BeamA	down
58.964	1.58436	0.449946	3.52123	0.000429553	0.0336819	ENSG00000287643	TM-BeamA	up
4.78437	-2.47479	0.666746	-3.71175	0.000205834	0.0218668	ENSG00000286423	TM-BeamA	down
148.585	-1.12503	0.330099	-3.40816	0.000654035	0.0424718	PAPLN	TM-BeamA	down
5.74197	2.02502	0.55709	3.63499	0.000277991	0.0264999	ENSG00000288028	TM-BeamA	up
4.98539	-2.44557	0.531768	-4.59894	4.24648e-06	0.00238766	ENSG00000258702	TM-BeamA	down
42.8974	-1.85268	0.405541	-4.56842	4.91404e-06	0.00257462	DIO3OS	TM-BeamA	down
296.69	-1.66453	0.489539	-3.40021	0.000673349	0.0429689	OCA2	TM-BeamA	down
7.75612	-2.21153	0.585113	-3.77966	0.000157042	0.0180226	FOXB1	TM-BeamA	down
30.5604	-1.84249	0.55286	-3.33264	0.000860249	0.0490874	DIS3L-AS1	TM-BeamA	down
828.629	1.01921	0.286905	3.55243	0.000381686	0.0310252	AAGAB	TM-BeamA	up
3.9745	-2.19784	0.569131	-3.86176	0.000112575	0.0147454	ENSG00000259624	TM-BeamA	down
13.261	-1.79595	0.439683	-4.08465	4.41433e-05	0.00841021	DNM1P35	TM-BeamA	down
6304.19	-1.00141	0.284549	-3.5193	0.000432691	0.0336988	CEMIP	TM-BeamA	down
7.55598	-2.07174	0.592077	-3.4991	0.000466829	0.0351447	ENSG00000291212	TM-BeamA	down
5.45724	1.75536	0.471665	3.72162	0.000197946	0.0213236	ENSG00000259544	TM-BeamA	up
3.83392	-2.72284	0.662816	-4.10799	3.99124e-05	0.0081737	ENSG00000259620	TM-BeamA	down
44.5437	2.57917	0.443391	5.81692	5.99412e-09	1.97403e-05	ENSG00000288872	TM-BeamA	up
25.3976	-1.174	0.330512	-3.55207	0.000382213	0.0310252	ENSG00000277135	TM-BeamA	down
7.75635	2.07432	0.452898	4.5801	4.6475e-06	0.0024916	ENSG00000289028	TM-BeamA	up
89.531	-1.09324	0.311519	-3.50938	0.000449154	0.0346476	ENSG00000291225	TM-BeamA	down
39.6089	-1.78408	0.451711	-3.94961	7.82783e-05	0.0117944	C16orf89	TM-BeamA	down
68.2088	-1.15372	0.344811	-3.34596	0.000819994	0.0478565	SYT17	TM-BeamA	down
958.346	1.27193	0.380511	3.34269	0.000829702	0.0480581	ACSM1	TM-BeamA	up
12.244	-1.32867	0.390827	-3.39964	0.000674738	0.0429689	CRYM	TM-BeamA	down
58.9503	1.55492	0.420617	3.69677	0.000218364	0.0228815	SDR42E2	TM-BeamA	up
10.6865	4.42975	1.04283	4.24779	2.15885e-05	0.00624442	ENSG00000274092	TM-BeamA	up
51.8397	-1.63859	0.474292	-3.45482	0.000550662	0.0385848	CDH5	TM-BeamA	down
18.0171	-1.4389	0.282065	-5.1013	3.37323e-07	0.000350546	PLEKHG4	TM-BeamA	down
13.4381	2.38953	0.640795	3.729	0.00019224	0.0211033	HP	TM-BeamA	up
5.71777	2.55464	0.659004	3.87652	0.000105962	0.0142851	ENSG00000245059	TM-BeamA	up
45.3206	-1.30639	0.36428	-3.58621	0.000335513	0.029409	PKD1L2	TM-BeamA	down
17.9564	1.90112	0.486832	3.90509	9.41901e-05	0.013414	TUBB3	TM-BeamA	up
72.1664	-1.65099	0.458471	-3.60107	0.000316906	0.0284266	ASPA	TM-BeamA	down
17.5392	-1.09606	0.283301	-3.86888	0.000109336	0.0146542	C17orf114	TM-BeamA	down
16.4495	-1.48893	0.371358	-4.00941	6.08708e-05	0.0102445	LLGL1	TM-BeamA	down
36.8233	-1.22258	0.297746	-4.1061	4.02392e-05	0.0081737	ENSG00000290454	TM-BeamA	down
6.66762	-1.35661	0.384141	-3.53153	0.000413156	0.0326425	ENSG00000290544	TM-BeamA	down
11.5461	-1.73787	0.432108	-4.02183	5.77465e-05	0.0100458	KCNJ12	TM-BeamA	down
5.84099	1.87245	0.51262	3.6527	0.000259493	0.0260091	TNS4	TM-BeamA	up
9.56079	2.31026	0.667751	3.45976	0.000540662	0.0381158	CCR7	TM-BeamA	up
11.5273	-1.29777	0.348371	-3.72526	0.000195117	0.0212171	MAP3K14-AS1	TM-BeamA	down
5.27233	-3.74514	0.927214	-4.03913	5.36496e-05	0.00973846	ENSG00000285668	TM-BeamA	down
28.7176	-1.08221	0.323934	-3.34084	0.000835245	0.0481134	KANSL1-AS1	TM-BeamA	down
502.995	-1.52585	0.421381	-3.62106	0.000293398	0.0270548	ARL17B	TM-BeamA	down
21.1925	-1.46894	0.336012	-4.37168	1.23294e-05	0.00473716	TTLL6	TM-BeamA	down
232.404	1.44585	0.412328	3.50655	0.000453962	0.0347681	TEX14	TM-BeamA	up
41.2164	1.7133	0.489633	3.49916	0.000466721	0.0351447	ENSG00000273702	TM-BeamA	up
53.0456	-1.79943	0.499329	-3.60369	0.000313733	0.0284266	ENSG00000290457	TM-BeamA	down
228.537	-1.62257	0.364501	-4.45147	8.52845e-06	0.00364086	MAP2K6	TM-BeamA	down
47.566	-1.17488	0.292528	-4.01631	5.91158e-05	0.0100948	PRCD	TM-BeamA	down
89.941	-1.13741	0.305778	-3.71974	0.000199429	0.0213834	AFMID	TM-BeamA	down
239.71	1.16137	0.333184	3.48567	0.000490907	0.036506	EIF4A3	TM-BeamA	up
167.101	-1.07566	0.275832	-3.89969	9.63145e-05	0.0135386	ARHGAP28	TM-BeamA	down
316.315	1.14292	0.306762	3.72576	0.000194731	0.0212171	CHMP1B	TM-BeamA	up
44.115	-1.27229	0.299628	-4.24623	2.17397e-05	0.00624442	RNF125	TM-BeamA	down
41.5481	-2.24018	0.367918	-6.08881	1.13756e-09	5.458e-06	RAB27B	TM-BeamA	down
2287.23	-1.69012	0.457921	-3.69086	0.000223502	0.0233139	CCDC102B	TM-BeamA	down
71.7307	-1.30864	0.301523	-4.34011	1.42412e-05	0.00497428	RBFADN	TM-BeamA	down
475.669	-1.21494	0.348059	-3.49061	0.000481926	0.0360709	CFD	TM-BeamA	down
12.989	1.83194	0.392473	4.66768	3.04614e-06	0.00195063	ENSG00000267262	TM-BeamA	up
11.7432	2.29937	0.663024	3.468	0.000524339	0.0374229	ZNF878	TM-BeamA	up
89.1362	-3.0242	0.393731	-7.68088	1.58002e-14	3.64242e-10	CPAMD8	TM-BeamA	down
86.8367	-1.03599	0.253776	-4.08229	4.45944e-05	0.00842651	ENSG00000291089	TM-BeamA	down
9.98102	-2.0939	0.466481	-4.48872	7.16518e-06	0.00330358	ENSG00000267892	TM-BeamA	down
13.2108	2.20851	0.511896	4.31437	1.60058e-05	0.00534757	ENSG00000289298	TM-BeamA	up
24.1212	1.417	0.337448	4.19918	2.67886e-05	0.00665341	ENSG00000289915	TM-BeamA	up
87.3609	-1.60485	0.370395	-4.3328	1.47223e-05	0.00506557	SSC5D	TM-BeamA	down
126.959	-1.08248	0.263917	-4.1016	4.10294e-05	0.0081737	ENSG00000286787	TM-BeamA	down
330.874	1.01854	0.295762	3.44378	0.000573648	0.0394756	SIRPA	TM-BeamA	up
4.17162	-1.84913	0.530342	-3.48666	0.000489084	0.0364882	ENSG00000289494	TM-BeamA	down
57.1417	-2.50882	0.678401	-3.69814	0.000217187	0.0228622	SLC4A11	TM-BeamA	down
31.4568	-1.27836	0.349066	-3.66223	0.000250026	0.0253914	FERMT1	TM-BeamA	down
44.2567	-1.35866	0.400698	-3.39073	0.000697062	0.0432235	LINC02871	TM-BeamA	down
17.1809	-1.59164	0.285581	-5.57335	2.49892e-08	4.75083e-05	DNMT3B	TM-BeamA	down
31.4081	2.44127	0.4123	5.92111	3.19774e-09	1.22863e-05	ENSG00000289872	TM-BeamA	up
225.829	2.17955	0.576486	3.78075	0.00015636	0.0180226	PCK1	TM-BeamA	up
19.664	-1.22212	0.331704	-3.68436	0.000229277	0.0237019	ENSG00000278996	TM-BeamA	down
15.8973	-1.86314	0.466167	-3.99673	6.42239e-05	0.0105084	APP-DT	TM-BeamA	down
27.3655	1.62773	0.484874	3.35702	0.000787871	0.046691	ENSG00000289939	TM-BeamA	up
38.3517	1.49523	0.401741	3.72188	0.000197749	0.0213236	ENSG00000205622	TM-BeamA	up
14.469	1.2441	0.345418	3.60171	0.000316128	0.0284266	SLC25A18	TM-BeamA	up
35.8667	-1.21802	0.355837	-3.42297	0.000619406	0.0410885	GP1BB	TM-BeamA	down
18.6029	1.01326	0.284754	3.55836	0.000373175	0.0306387	SERPIND1	TM-BeamA	up
16.0082	-1.65883	0.369287	-4.49199	7.05599e-06	0.00330358	P2RX6	TM-BeamA	down
21.9224	-1.19189	0.288114	-4.13688	3.52066e-05	0.00750724	FOXRED2	TM-BeamA	down
12.3933	-2.0012	0.596866	-3.35285	0.000799836	0.0471576	MIR3667HG	TM-BeamA	down
29.0853	-1.10469	0.289347	-3.81788	0.000134602	0.0165052	DENND6B	TM-BeamA	down
112.145	1.25021	0.259992	4.80864	1.51957e-06	0.00113002	KLHL15	TM-BeamA	up
21.0715	-1.28874	0.361974	-3.5603	0.000370432	0.0306078	ZNF157	TM-BeamA	down
15.757	-1.5716	0.374978	-4.19118	2.77513e-05	0.00677232	MIR325HG	TM-BeamA	down
38.2415	-1.94878	0.519	-3.75487	0.000173429	0.0194081	LPAR4	TM-BeamA	down
66.7051	-1.49441	0.434528	-3.43916	0.000583527	0.0397989	IL1RAPL2	TM-BeamA	down
6.33756	3.30446	0.655758	5.03914	4.67617e-07	0.000428115	ENSG00000289365	TM-BeamA	up
140.186	-1.42272	0.334405	-4.25448	2.09532e-05	0.00624442	GRIA3	TM-BeamA	down
12.8621	-2.67622	0.800126	-3.34475	0.000823564	0.0479435	MAGEC3	TM-BeamA	down
40.6923	-1.09455	0.283366	-3.86268	0.000112148	0.0147454	ZNF185	TM-BeamA	down
10.6887	-1.35958	0.425391	-3.19609	0.00139306	0.0401109	AGRN	TM-BeamB	down
4.20072	-1.82329	0.56523	-3.22575	0.00125641	0.0371817	MMEL1	TM-BeamB	down
25.8688	-1.59576	0.51402	-3.10446	0.00190626	0.0487121	ENSG00000236948	TM-BeamB	down
19.7766	-1.06414	0.336183	-3.16536	0.00154889	0.0428287	ENSG00000289893	TM-BeamB	down
24.7775	-1.03761	0.260395	-3.98475	6.7552e-05	0.00586021	TNFRSF25	TM-BeamB	down
70.7455	-1.02728	0.279399	-3.67675	0.000236225	0.0130104	TCEA3	TM-BeamB	down
7.91278	-1.5815	0.41706	-3.79203	0.00014942	0.00964927	SYTL1	TM-BeamB	down
195.429	1.10616	0.255859	4.32331	1.53704e-05	0.00237161	ENSG00000225313	TM-BeamB	up
9.35577	1.48057	0.428785	3.45294	0.000554511	0.0224616	YRDC	TM-BeamB	up
25.4538	6.56444	1.59553	4.11426	3.88417e-05	0.00413214	ENSG00000287400	TM-BeamB	up
7.76023	-1.22641	0.388393	-3.15765	0.00159045	0.0435607	CFAP57	TM-BeamB	down
57.6979	-1.05887	0.272401	-3.88718	0.000101417	0.0074543	ARMH1	TM-BeamB	down
141.11	-1.12075	0.261692	-4.28272	1.84621e-05	0.00259149	ACOT11	TM-BeamB	down
134.007	-1.24518	0.392345	-3.17368	0.00150521	0.0419899	MROH7	TM-BeamB	down
7.90441	2.26145	0.518748	4.35943	1.30399e-05	0.00212561	PTGER3	TM-BeamB	up
2.65572	-2.25525	0.717254	-3.14428	0.00166498	0.0449322	ENSG00000236676	TM-BeamB	down
14.3959	-1.50215	0.454581	-3.30448	0.000951538	0.0310718	PLPPR4	TM-BeamB	down
100.496	-1.86775	0.462844	-4.03539	5.45127e-05	0.00500848	LINC02785	TM-BeamB	down
37.1592	1.44296	0.419863	3.43674	0.000588767	0.0231983	NGF	TM-BeamB	up
23.5316	2.54562	0.633786	4.01654	5.906e-05	0.00526231	TBX15	TM-BeamB	up
14.8007	1.53838	0.489114	3.14523	0.00165954	0.0448454	H2BC18	TM-BeamB	up
35.8284	1.60556	0.434963	3.69125	0.000223157	0.0124961	BOLA1	TM-BeamB	up
14.768	-1.10104	0.292443	-3.76498	0.000166559	0.0106122	MTMR11	TM-BeamB	down
33.5299	-1.31667	0.417586	-3.15304	0.00161577	0.0438974	CADM3	TM-BeamB	down
29.1126	2.5348	0.771905	3.28382	0.00102411	0.0327538	ADAMTS4	TM-BeamB	up
7.84423	-1.28645	0.405373	-3.17351	0.0015061	0.0419899	TNFSF4	TM-BeamB	down
20.9577	-2.09067	0.561419	-3.72391	0.000196164	0.0116963	ASTN1	TM-BeamB	down
2.27152	-2.64362	0.821924	-3.21638	0.00129818	0.0380842	BRINP2	TM-BeamB	down
4.76242	-1.59496	0.501482	-3.18049	0.00147028	0.0414487	LINC01036	TM-BeamB	down
10.0792	-1.70929	0.422601	-4.0447	5.23894e-05	0.00487306	ENSG00000227240	TM-BeamB	down
31.1337	-1.02373	0.327003	-3.13065	0.00174418	0.0462058	CSRP1-AS1	TM-BeamB	down
3.07021	3.15671	0.941036	3.3545	0.000795087	0.0272879	LINC01353	TM-BeamB	up
2.62155	3.82269	0.948123	4.03185	5.53399e-05	0.00506147	ENSG00000288925	TM-BeamB	up
4.13436	-3.01351	0.881797	-3.41746	0.00063209	0.0241123	KLHDC8A	TM-BeamB	down
626.449	-1.59767	0.428148	-3.73159	0.000190274	0.0114156	KCNH1	TM-BeamB	down
24.2692	-1.17308	0.282032	-4.15939	3.19099e-05	0.00379086	SMYD2	TM-BeamB	down
5.01862	-2.12115	0.594406	-3.56852	0.00035901	0.0169897	SLC30A10	TM-BeamB	down
2.80611	-2.50546	0.728464	-3.43937	0.000583073	0.0231545	HHIPL2	TM-BeamB	down
171.681	-1.04638	0.26301	-3.9785	6.93527e-05	0.00589003	OBSCN	TM-BeamB	down
5.78524	-1.81481	0.511815	-3.54583	0.000391378	0.0181028	ENSG00000287315	TM-BeamB	down
28.9327	1.10337	0.344726	3.20072	0.00137083	0.0395838	URB2	TM-BeamB	up
7.02495	2.26907	0.527552	4.30114	1.69923e-05	0.00249731	ENSG00000288760	TM-BeamB	up
358.527	-1.42499	0.284832	-5.00293	5.64662e-07	0.00022827	KIF26B	TM-BeamB	down
163.87	2.56434	0.573211	4.47364	7.68999e-06	0.00158292	ENSG00000225649	TM-BeamB	up
18.8415	-1.10924	0.326559	-3.39675	0.000681909	0.0251064	KIF3C	TM-BeamB	down
12.8091	-2.22356	0.569327	-3.9056	9.39928e-05	0.00698484	DRC1	TM-BeamB	down
5.16422	-2.17698	0.554159	-3.92844	8.54986e-05	0.00669839	ABHD1	TM-BeamB	down
210.522	-1.64053	0.408892	-4.01212	6.01749e-05	0.00533471	ALK	TM-BeamB	down
235.209	-2.19947	0.314829	-6.98625	2.82329e-12	2.85336e-08	VIT	TM-BeamB	down
13.7335	-1.41541	0.408652	-3.4636	0.000532994	0.0217427	ENSG00000229160	TM-BeamB	down
10.4785	-1.13197	0.347193	-3.26034	0.00111278	0.0343642	EPCAM	TM-BeamB	down
132.687	-1.01921	0.251455	-4.05327	5.05061e-05	0.00482211	MSH2	TM-BeamB	down
63.3389	1.28371	0.380964	3.36964	0.000752668	0.0266439	EML6	TM-BeamB	up
84.772	-1.11591	0.351397	-3.17563	0.00149509	0.0419145	ENSG00000285755	TM-BeamB	down
217.838	1.15921	0.286598	4.04472	5.23848e-05	0.00487306	PELI1	TM-BeamB	up
10.6279	-1.54594	0.444678	-3.47654	0.000507926	0.0214336	ANKRD53	TM-BeamB	down
8.49304	-2.547	0.637338	-3.99632	6.4335e-05	0.00560519	ENSG00000236209	TM-BeamB	down
22.7184	-1.82547	0.492723	-3.70486	0.000211504	0.0122849	CTNNA2	TM-BeamB	down
9.62139	2.41732	0.749477	3.22534	0.00125821	0.0371817	SH2D6	TM-BeamB	up
944.741	1.65823	0.337054	4.91978	8.66394e-07	0.000307235	MAT2A	TM-BeamB	up
31.1253	-1.42816	0.437759	-3.26244	0.00110458	0.0342962	ATOH8	TM-BeamB	down
50.5139	3.63458	1.06086	3.42607	0.000612393	0.023813	IL1RL1	TM-BeamB	up
141.787	1.21348	0.313337	3.87276	0.000107609	0.00776818	IL18R1	TM-BeamB	up
54.2896	-1.44443	0.264082	-5.46964	4.50961e-08	3.79803e-05	PANTR1	TM-BeamB	down
19.8611	-1.06243	0.303083	-3.5054	0.000455921	0.019904	ENSG00000269707	TM-BeamB	down
19.9464	-1.30181	0.329894	-3.94614	7.94202e-05	0.00642129	POU3F3	TM-BeamB	down
94.0913	-2.12425	0.534397	-3.97505	7.03653e-05	0.00589419	ST6GAL2	TM-BeamB	down
788.093	1.27805	0.279475	4.57304	4.8069e-06	0.00115669	SH3RF3	TM-BeamB	up
3.98015	5.41484	1.02649	5.27509	1.32693e-07	7.0582e-05	ENSG00000289202	TM-BeamB	up
169.535	-1.15865	0.314448	-3.68471	0.000228961	0.0127142	SCTR	TM-BeamB	down
22.9275	2.02841	0.4735	4.28387	1.8367e-05	0.00259149	TNFAIP6	TM-BeamB	up
203.866	-1.49152	0.471469	-3.16356	0.0015585	0.0429182	NEB	TM-BeamB	down
196.538	-1.9381	0.505501	-3.83403	0.000126062	0.00863762	LINC01876	TM-BeamB	down
30.194	-1.06286	0.323435	-3.28615	0.00101567	0.0325352	GALNT5	TM-BeamB	down
59.7623	-1.47257	0.47332	-3.11115	0.00186361	0.0481086	UPP2	TM-BeamB	down
90.6966	-1.573	0.286069	-5.49869	3.82623e-08	3.68284e-05	CCDC148	TM-BeamB	down
7.50951	-1.55483	0.405199	-3.83721	0.000124439	0.00863762	DAPL1	TM-BeamB	down
100.691	-1.01572	0.252893	-4.01638	5.90978e-05	0.00526231	LY75	TM-BeamB	down
3.64614	-2.90806	0.808654	-3.59618	0.000322928	0.0159593	ENSG00000288091	TM-BeamB	down
424.026	-1.56078	0.449284	-3.47394	0.00051288	0.021557	ENSG00000236283	TM-BeamB	down
94.9998	-1.69967	0.458868	-3.70406	0.00021218	0.0122888	SCN2A	TM-BeamB	down
21.0902	-1.50542	0.415728	-3.62116	0.000293289	0.0150082	SPC25	TM-BeamB	down
8.5916	-2.49218	0.780323	-3.19378	0.00140425	0.0402611	CCDC141	TM-BeamB	down
8.71514	-2.34931	0.753072	-3.11963	0.00181077	0.0474106	LINC01934	TM-BeamB	down
49.6849	-1.09792	0.27099	-4.05151	5.08872e-05	0.00482211	PDE1A	TM-BeamB	down
4.18868	2.96212	0.732938	4.04143	5.31257e-05	0.00490333	ENSG00000288900	TM-BeamB	up
2690.18	-1.34448	0.393422	-3.41739	0.000632238	0.0241123	TMEFF2	TM-BeamB	down
76.2148	-1.04588	0.306851	-3.40842	0.000653391	0.024467	HECW2	TM-BeamB	down
160.605	1.48772	0.340363	4.37097	1.23695e-05	0.00208051	HSPE1	TM-BeamB	up
155.649	-1.37684	0.375235	-3.66927	0.000243247	0.0132885	C2CD6	TM-BeamB	down
153.355	-1.4157	0.421846	-3.35597	0.000790876	0.0272879	SNHG31	TM-BeamB	down
43.318	-2.16367	0.524923	-4.12188	3.75792e-05	0.00412054	ENSG00000227769	TM-BeamB	down
45.0759	-2.10181	0.502083	-4.18619	2.83675e-05	0.0034963	LINC00607	TM-BeamB	down
454.01	1.06635	0.258098	4.13157	3.60292e-05	0.00404221	DGKD	TM-BeamB	up
14.5522	-1.16024	0.353853	-3.27889	0.00104218	0.0329664	MLPH	TM-BeamB	down
81.9174	-1.62627	0.401582	-4.04966	5.12914e-05	0.00482211	LINC01237	TM-BeamB	down
5.32499	-2.27086	0.670762	-3.38549	0.000710507	0.0257374	LINC01238	TM-BeamB	down
136.976	-1.13528	0.326154	-3.4808	0.000499927	0.0212417	CNTN6	TM-BeamB	down
16.7103	-1.8322	0.551689	-3.32108	0.000896703	0.0298601	ENSG00000270207	TM-BeamB	down
156.726	-1.31001	0.32329	-4.05211	5.07573e-05	0.00482211	SRGAP3	TM-BeamB	down
87.3094	-1.04216	0.203984	-5.10902	3.23827e-07	0.000148762	OGG1	TM-BeamB	down
103.826	-2.17615	0.370429	-5.87467	4.23689e-09	7.13669e-06	SLC6A1	TM-BeamB	down
60.2175	-1.27707	0.224201	-5.69609	1.22583e-08	1.40061e-05	GRIP2	TM-BeamB	down
178.145	1.34443	0.390516	3.44269	0.000575965	0.0230534	FGD5	TM-BeamB	up
162.656	-1.06564	0.229586	-4.64159	3.45732e-06	0.000873536	BTD	TM-BeamB	down
23.9002	-1.33706	0.331886	-4.02866	5.60947e-05	0.0051074	SATB1-AS1	TM-BeamB	down
124.378	1.03139	0.304571	3.38638	0.000708221	0.0257007	ABHD5	TM-BeamB	up
57.6954	-2.545	0.603061	-4.22014	2.44154e-05	0.0032046	SLC6A20	TM-BeamB	down
143.987	-1.36528	0.331517	-4.11827	3.81735e-05	0.00412054	COL7A1	TM-BeamB	down
25.391	-1.04018	0.257218	-4.04396	5.25566e-05	0.00487306	UBA7	TM-BeamB	down
12.939	1.06855	0.318233	3.35777	0.000785745	0.0272423	RRP9	TM-BeamB	up
22.0805	-1.00646	0.324843	-3.09829	0.00194642	0.0492933	STAB1	TM-BeamB	down
291.969	-1.5544	0.369841	-4.20288	2.63539e-05	0.00337147	CADPS	TM-BeamB	down
9.54606	-3.3196	0.684855	-4.84716	1.2524e-06	0.000414996	TAFA4	TM-BeamB	down
11.3823	-1.95708	0.623276	-3.13999	0.00168953	0.0454357	LINC00870	TM-BeamB	down
179.749	-1.17656	0.22273	-5.28242	1.27488e-07	7.0582e-05	LINC02018	TM-BeamB	down
39.3003	-1.56345	0.342474	-4.56515	4.99138e-06	0.00117315	ENSG00000290410	TM-BeamB	down
9555.32	1.05174	0.233865	4.49722	6.88488e-06	0.00151265	CBLB	TM-BeamB	up
19.2381	-1.66798	0.442355	-3.77069	0.000162797	0.0104134	CD96	TM-BeamB	down
39.8266	-1.29738	0.354005	-3.66485	0.000247482	0.0134111	IGSF11	TM-BeamB	down
41.7797	1.03829	0.306962	3.38246	0.000718397	0.0258841	GATA2-AS1	TM-BeamB	up
113.465	-1.48839	0.311396	-4.77973	1.75528e-06	0.000554366	NEK11	TM-BeamB	down
22.6852	-2.34542	0.568191	-4.12788	3.66121e-05	0.00406263	CPNE4	TM-BeamB	down
28.5166	-1.66966	0.504428	-3.31001	0.000932928	0.0306622	EPHB1	TM-BeamB	down
2156.18	1.09769	0.276448	3.97071	7.16588e-05	0.00591199	CCNL1	TM-BeamB	up
10.7756	-1.53581	0.46584	-3.29687	0.000977702	0.0317212	VEPH1	TM-BeamB	down
711.818	1.85066	0.28296	6.54034	6.13775e-11	2.48125e-07	LXN	TM-BeamB	up
10.9714	1.90268	0.51074	3.72534	0.000195053	0.0116645	ENSG00000272087	TM-BeamB	up
7980.01	2.01159	0.300959	6.68392	2.32629e-11	1.17553e-07	RARRES1	TM-BeamB	up
134.256	-1.77836	0.435899	-4.07975	4.50845e-05	0.00456315	ENSG00000223930	TM-BeamB	down
80.982	-1.26524	0.269645	-4.69226	2.70208e-06	0.000753031	ECE2	TM-BeamB	down
15.8779	-1.4753	0.427626	-3.44998	0.000560623	0.0226638	LINC02026	TM-BeamB	down
15.8731	-1.45129	0.302341	-4.80017	1.58533e-06	0.000516842	TMEM44	TM-BeamB	down
18.8404	-1.31906	0.261016	-5.05358	4.33614e-07	0.000182597	MELTF	TM-BeamB	down
13.1852	-1.6947	0.387019	-4.37884	1.19311e-05	0.00204013	FGFR3	TM-BeamB	down
133.875	-1.05729	0.207949	-5.08435	3.6889e-07	0.000159036	ENSG00000287117	TM-BeamB	down
2025.01	-1.552	0.359229	-4.32035	1.55779e-05	0.00238543	LDB2	TM-BeamB	down
4.68338	-2.31389	0.671567	-3.4455	0.000569994	0.0229051	ENSG00000248545	TM-BeamB	down
232.245	1.0863	0.322601	3.36732	0.000759029	0.0267794	ARAP2	TM-BeamB	up
68.3973	-2.43202	0.689876	-3.5253	0.000423002	0.0191278	RASSF6	TM-BeamB	down
25.9469	3.18915	0.600374	5.31193	1.08469e-07	6.26422e-05	ADH4	TM-BeamB	up
67.8692	2.95325	0.839117	3.51947	0.000432404	0.0192751	ADH1B	TM-BeamB	up
54.8472	1.66605	0.425785	3.91289	9.11991e-05	0.0069137	PCDH10	TM-BeamB	up
17.5196	-1.96245	0.478885	-4.09797	4.16793e-05	0.0043426	LINC02355	TM-BeamB	down
12.5774	1.07218	0.317804	3.37371	0.000741631	0.0264621	TMEM154	TM-BeamB	up
9.3618	-2.75333	0.794995	-3.46333	0.000533536	0.0217427	ENSG00000251244	TM-BeamB	down
74.7669	-1.09463	0.282083	-3.88053	0.00010423	0.00760577	FRG1-DT	TM-BeamB	down
20.8498	-1.18006	0.310606	-3.79921	0.000145157	0.00946156	LINC02102	TM-BeamB	down
42.7436	1.66629	0.30527	5.45842	4.80396e-08	3.8841e-05	LINC02196	TM-BeamB	up
11.6871	-2.07893	0.550277	-3.77797	0.000158112	0.0101458	ENSG00000288002	TM-BeamB	down
3.91963	-2.51939	0.744623	-3.38345	0.000715824	0.0258374	LINC02212	TM-BeamB	down
7.64925	-1.60103	0.499029	-3.20829	0.00133529	0.038779	LINC02100	TM-BeamB	down
150.855	-1.31725	0.325218	-4.05037	5.11375e-05	0.00482211	ADAMTS12	TM-BeamB	down
5.09927	-1.74615	0.534919	-3.26432	0.00109726	0.034236	ENSG00000286271	TM-BeamB	down
7.43459	2.76526	0.723934	3.81977	0.000133575	0.00887921	FST	TM-BeamB	up
4.7298	2.00539	0.601046	3.3365	0.000848408	0.0285663	ENSG00000288957	TM-BeamB	up
11.2402	-1.37954	0.404057	-3.41423	0.000639622	0.0241657	ANKRD55	TM-BeamB	down
45.6433	-1.60699	0.448501	-3.58303	0.000339631	0.0164312	RMEL3	TM-BeamB	down
21.515	-1.57347	0.412957	-3.81026	0.000138819	0.00913989	C5orf64	TM-BeamB	down
2.77399	-2.59045	0.793424	-3.2649	0.00109502	0.034236	S100Z	TM-BeamB	down
548.958	1.37247	0.3377	4.06416	4.82059e-05	0.0047531	EDIL3	TM-BeamB	up
17.5405	-1.3323	0.364886	-3.65127	0.00026095	0.0138805	FAM174A-DT	TM-BeamB	down
24.0255	1.24619	0.354675	3.51362	0.00044205	0.0195091	LINC02147	TM-BeamB	up
31.779	-1.08231	0.227043	-4.767	1.86986e-06	0.000572659	REEP2	TM-BeamB	down
15.704	-1.0605	0.309911	-3.42195	0.000621736	0.024075	ENSG00000249526	TM-BeamB	down
24.6744	-2.19298	0.565405	-3.87859	0.000105064	0.00763905	ENSG00000286736	TM-BeamB	down
162.848	-1.63767	0.330088	-4.96131	7.00178e-07	0.000262087	PRELID2	TM-BeamB	down
4.40918	-2.896	0.648656	-4.46463	8.02089e-06	0.00160827	HTR4	TM-BeamB	down
200.226	-1.12377	0.252472	-4.45108	8.54402e-06	0.00166058	SYNPO	TM-BeamB	down
9.93506	-1.68642	0.413584	-4.07759	4.5505e-05	0.00457608	ENSG00000253256	TM-BeamB	down
108.976	-1.42983	0.423009	-3.38014	0.0007245	0.0260575	LINC03000	TM-BeamB	down
47.294	-1.6359	0.453334	-3.6086	0.000307858	0.0154795	ENSG00000253693	TM-BeamB	down
56.9123	-1.4487	0.386237	-3.75081	0.000176263	0.0109288	TENM2	TM-BeamB	down
2973.57	-1.3894	0.271086	-5.12531	2.97056e-07	0.000139637	KCNIP1	TM-BeamB	down
10.8526	-1.96894	0.482654	-4.07941	4.51506e-05	0.00456315	KCNIP1-OT1	TM-BeamB	down
9.51168	-1.20423	0.364919	-3.3	0.000966858	0.0314704	FGFR4	TM-BeamB	down
7.09899	2.65852	0.606998	4.37978	1.18798e-05	0.00204013	ENSG00000286364	TM-BeamB	up
5.3323	2.60089	0.759286	3.42545	0.000613791	0.023813	LINC02521	TM-BeamB	up
33.1668	1.22948	0.380418	3.23193	0.00122959	0.0366973	LINC01600	TM-BeamB	up
46.7301	-1.0532	0.234432	-4.49257	7.03685e-06	0.00151675	BPHL	TM-BeamB	down
303.93	-1.05468	0.255567	-4.12682	3.67813e-05	0.00406263	HULC	TM-BeamB	down
26.1138	-1.70445	0.387558	-4.39792	1.09291e-05	0.00199019	GFOD1	TM-BeamB	down
144.285	1.48619	0.374213	3.97152	7.14162e-05	0.00591199	SOX4	TM-BeamB	up
2.70056	2.73633	0.789458	3.46609	0.000528079	0.021692	LINC02828	TM-BeamB	up
16.9725	-1.05894	0.266344	-3.97582	7.01365e-05	0.00589419	HFE	TM-BeamB	down
3.55599	2.43934	0.72314	3.37326	0.000742839	0.0264621	H2BC8	TM-BeamB	up
4.32716	2.18185	0.701658	3.10956	0.00187365	0.0482737	HCG9	TM-BeamB	up
232.197	2.17599	0.602621	3.61087	0.000305172	0.0154211	HSPA1A	TM-BeamB	up
166.834	1.88897	0.544964	3.46623	0.00052782	0.021692	HSPA1B	TM-BeamB	up
11.8392	-1.57478	0.507674	-3.10196	0.00192244	0.0489399	LRFN2	TM-BeamB	down
22.9388	-1.01617	0.311392	-3.2633	0.00110122	0.0342597	RSPH9	TM-BeamB	down
24.6041	-1.79517	0.47128	-3.80915	0.000139447	0.00915147	ENSG00000286417	TM-BeamB	down
12.1686	-2.3006	0.556886	-4.13118	3.609e-05	0.00404221	PKHD1	TM-BeamB	down
21.0302	-1.35627	0.322054	-4.21131	2.53891e-05	0.00328968	BEND6	TM-BeamB	down
100.122	-1.61428	0.385456	-4.18798	2.81448e-05	0.0034963	RIMS1	TM-BeamB	down
2464.34	-1.56947	0.291398	-5.386	7.20427e-08	4.55647e-05	KCNQ5	TM-BeamB	down
3.76676	-2.60231	0.750094	-3.46931	0.000521788	0.0216836	ENSG00000234426	TM-BeamB	down
202.324	-1.6398	0.465964	-3.51915	0.000432934	0.0192751	ENSG00000287683	TM-BeamB	down
214.668	-1.26931	0.295441	-4.29634	1.73645e-05	0.00249731	LINC01013	TM-BeamB	down
2.30589	-2.43842	0.782554	-3.11597	0.00183339	0.047692	LINC01625	TM-BeamB	down
92.3195	1.09464	0.170147	6.43348	1.24714e-10	3.60121e-07	LTV1	TM-BeamB	up
44.253	-1.30826	0.297887	-4.3918	1.12415e-05	0.00202878	SYTL3	TM-BeamB	down
336.438	1.24972	0.358179	3.48909	0.000484664	0.0207553	THBS2	TM-BeamB	up
79.6517	-1.34674	0.35801	-3.76174	0.000168735	0.0106583	COL28A1	TM-BeamB	down
190.957	-1.5553	0.386215	-4.02702	5.64883e-05	0.00512017	ENSG00000229618	TM-BeamB	down
103.582	1.17184	0.306829	3.81919	0.000133893	0.00887921	GGCT	TM-BeamB	up
209.307	1.45178	0.466959	3.10901	0.00187717	0.0482737	INHBA	TM-BeamB	up
22.3512	1.37885	0.308297	4.47248	7.73159e-06	0.00158292	SNHG15	TM-BeamB	up
46.0063	1.62653	0.414339	3.9256	8.65145e-05	0.00675093	IGFBP3	TM-BeamB	up
96.2495	1.31212	0.423315	3.09964	0.00193757	0.0491393	COBL	TM-BeamB	up
6.77514	-1.64983	0.50609	-3.25996	0.00111429	0.0343642	ENSG00000290839	TM-BeamB	down
18.6911	-1.33156	0.334423	-3.98166	6.84354e-05	0.00588391	ZP3	TM-BeamB	down
112.497	1.0013	0.279543	3.58193	0.000341067	0.0164312	HGF	TM-BeamB	up
27.4115	1.58375	0.388101	4.08078	4.48849e-05	0.00456315	STEAP1	TM-BeamB	up
591.979	1.76821	0.326632	5.41347	6.18137e-08	4.30842e-05	STEAP2	TM-BeamB	up
48.2216	-1.06912	0.305515	-3.4994	0.000466303	0.0201828	PDK4-AS1	TM-BeamB	down
217.046	2.37938	0.621772	3.82678	0.00012983	0.00874748	TAC1	TM-BeamB	up
12.9035	-1.42249	0.37967	-3.74664	0.000179217	0.011078	COL26A1	TM-BeamB	down
176.74	-1.58089	0.360599	-4.38406	1.16486e-05	0.00204013	RELN	TM-BeamB	down
189.743	-1.16699	0.343665	-3.39571	0.000684499	0.025156	CDHR3	TM-BeamB	down
83.9672	1.39791	0.443034	3.15531	0.00160326	0.0437357	CCDC71L	TM-BeamB	up
2.47305	-2.52503	0.79545	-3.17434	0.00150178	0.0419854	LAMB4	TM-BeamB	down
44.8527	-1.47973	0.335062	-4.4163	1.00405e-05	0.00187916	ANKRD7	TM-BeamB	down
4.08059	-2.57634	0.716407	-3.5962	0.000322902	0.0159593	ENSG00000234352	TM-BeamB	down
17.1	-1.19382	0.366236	-3.25971	0.00111527	0.0343642	AGK-DT	TM-BeamB	down
25.657	-1.48062	0.433816	-3.41301	0.000642498	0.024184	EPHB6	TM-BeamB	down
19.746	1.58853	0.411568	3.8597	0.000113525	0.0080799	ENSG00000289470	TM-BeamB	up
24.9269	-2.04366	0.508591	-4.01829	5.86227e-05	0.00526231	ENSG00000282142	TM-BeamB	down
35.0607	-1.52498	0.421605	-3.61708	0.000297942	0.0151695	LINC03021-1	TM-BeamB	down
77.9528	-1.8723	0.45112	-4.15033	3.3199e-05	0.00385073	CSMD1	TM-BeamB	down
264.471	1.59371	0.426394	3.73765	0.000185751	0.011309	SGCZ	TM-BeamB	up
2599.23	-1.44479	0.32413	-4.45744	8.29457e-06	0.00162775	NRG1	TM-BeamB	down
4.64244	-2.14643	0.607113	-3.53548	0.000407034	0.018614	NRG1-IT1	TM-BeamB	down
22.4485	1.97856	0.388275	5.09576	3.47339e-07	0.000156017	TCIM	TM-BeamB	up
37.9373	-1.25475	0.36784	-3.41114	0.000646918	0.0243051	ENSG00000253608	TM-BeamB	down
50.2662	-1.55899	0.38037	-4.0986	4.15652e-05	0.0043426	CPA6	TM-BeamB	down
207.647	2.47438	0.482694	5.12618	2.95673e-07	0.000139637	RDH10-AS1	TM-BeamB	up
49.8457	1.2162	0.329132	3.69516	0.00021975	0.0124961	TMEM70	TM-BeamB	up
9.77962	-4.14601	1.28136	-3.23564	0.00121369	0.0364523	ENSG00000287352	TM-BeamB	down
15.0589	-2.25779	0.671009	-3.36477	0.000766085	0.0268762	LINC02906	TM-BeamB	down
45.5225	-1.48518	0.295613	-5.02405	5.05928e-07	0.000208701	PKHD1L1	TM-BeamB	down
8.10275	-1.67208	0.505078	-3.31053	0.000931185	0.0306548	ENSG00000254812	TM-BeamB	down
167.359	2.3132	0.564057	4.101	4.11373e-05	0.00433078	SLC1A1	TM-BeamB	up
892.94	1.39967	0.379038	3.69268	0.0002219	0.0124961	IL33	TM-BeamB	up
112.379	-1.86286	0.366424	-5.08388	3.69797e-07	0.000159036	FREM1	TM-BeamB	down
20.8457	-1.27008	0.387089	-3.28109	0.00103407	0.0329339	DNAI1	TM-BeamB	down
52.7234	-1.12058	0.267498	-4.18911	2.80054e-05	0.0034963	IL11RA	TM-BeamB	down
5.8794	-1.44133	0.465872	-3.09383	0.00197588	0.0498201	ENSG00000288838	TM-BeamB	down
44.5961	-1.04268	0.250749	-4.15824	3.20703e-05	0.00379086	ENTREP1	TM-BeamB	down
92.9186	-1.77088	0.379695	-4.66396	3.10182e-06	0.000793635	ENSG00000290551	TM-BeamB	down
184.838	1.40827	0.230069	6.12107	9.2948e-10	2.08751e-06	S1PR3	TM-BeamB	up
2.7094	2.95057	0.876372	3.3668	0.00076047	0.0267794	ENSG00000227619	TM-BeamB	up
22.0311	-1.14997	0.335714	-3.42546	0.000613763	0.023813	PPP1R26-AS1	TM-BeamB	down
9.88497	-1.46919	0.343359	-4.27887	1.87848e-05	0.0026186	ENSG00000205740	TM-BeamB	down
16.1476	-1.27603	0.349025	-3.65598	0.000256202	0.0137363	AKR1E2	TM-BeamB	down
142.183	1.48817	0.457831	3.25049	0.00115208	0.0351067	IL15RA	TM-BeamB	up
3.48215	-2.02107	0.586111	-3.44826	0.000564203	0.0227459	ENSG00000231496	TM-BeamB	down
598.544	-1.22293	0.390761	-3.1296	0.00175044	0.0463019	NEBL	TM-BeamB	down
497.643	-1.16129	0.225619	-5.14712	2.64513e-07	0.000130405	KIAA1217	TM-BeamB	down
156.867	1.65148	0.476537	3.46559	0.000529074	0.021692	DEPP1	TM-BeamB	up
8.8489	-1.30654	0.401232	-3.25632	0.00112867	0.0346216	GPRIN2	TM-BeamB	down
73.3131	-1.59232	0.397464	-4.00621	6.17003e-05	0.00542238	PCDH15	TM-BeamB	down
49.884	-1.30183	0.417664	-3.11693	0.00182744	0.0476005	LINC02929	TM-BeamB	down
90.9284	-1.18676	0.285805	-4.15234	3.29089e-05	0.00384501	LRRTM3	TM-BeamB	down
46.3251	-1.16435	0.317528	-3.66692	0.000245486	0.0133387	COL13A1	TM-BeamB	down
1150.2	-1.24159	0.305726	-4.06111	4.88395e-05	0.0047922	CDH23	TM-BeamB	down
145.149	-1.70143	0.359503	-4.73272	2.21534e-06	0.000644863	ENSG00000270087	TM-BeamB	down
3.0404	-2.28729	0.739729	-3.09206	0.0019877	0.0499718	CDHR1	TM-BeamB	down
4.09319	-2.19787	0.677479	-3.24419	0.00117785	0.0356405	ENSG00000231829	TM-BeamB	down
23.5908	-1.51624	0.343567	-4.41322	1.01846e-05	0.00188863	HOGA1	TM-BeamB	down
6.73818	-1.81399	0.567802	-3.19476	0.00139946	0.040238	PKD2L1	TM-BeamB	down
7.59334	-1.3146	0.400879	-3.27929	0.00104069	0.0329664	PDZD7	TM-BeamB	down
104.008	-2.7701	0.509082	-5.44136	5.28751e-08	4.02473e-05	SORCS3	TM-BeamB	down
212.671	-1.23378	0.33534	-3.67919	0.000233974	0.0129239	SORCS1	TM-BeamB	down
275.336	-1.11377	0.261438	-4.26015	2.04286e-05	0.0027346	ADD3-AS1	TM-BeamB	down
13.8575	-1.82822	0.537659	-3.40032	0.00067306	0.0249108	PLPP4	TM-BeamB	down
23.6142	-2.04709	0.52063	-3.93195	8.42605e-05	0.00662707	LINC02930	TM-BeamB	down
49.3236	-1.53555	0.391642	-3.92081	8.82508e-05	0.00680845	ENSG00000227307	TM-BeamB	down
7.55854	-1.55508	0.46564	-3.33966	0.000838809	0.0284477	ENSG00000278484	TM-BeamB	down
2956.19	-1.05466	0.201522	-5.2335	1.66328e-07	8.62047e-05	FGFR2	TM-BeamB	down
1187.68	-1.11031	0.188228	-5.89874	3.66279e-09	6.73054e-06	CHST15	TM-BeamB	down
1309.13	-1.67707	0.33749	-4.96926	6.72102e-07	0.000256324	ADAM12	TM-BeamB	down
33.9226	-1.46156	0.418449	-3.49279	0.000478	0.0205571	EPS8L2	TM-BeamB	down
2.82362	-2.52476	0.7199	-3.5071	0.000453021	0.0198632	ENSG00000269915	TM-BeamB	down
67.5643	-1.49986	0.34793	-4.3108	1.62668e-05	0.00246085	ENSG00000255367	TM-BeamB	down
56.7253	-1.49254	0.256737	-5.81348	6.11878e-09	8.24525e-06	PGAP2	TM-BeamB	down
44.0853	-1.43095	0.365956	-3.91016	9.22334e-05	0.0069137	ENSG00000282556	TM-BeamB	down
89.5456	1.59428	0.26889	5.92913	3.04543e-09	6.15573e-06	SPON1	TM-BeamB	up
32.5751	-1.49868	0.432054	-3.46873	0.000522919	0.0216836	TPH1	TM-BeamB	down
149.583	-1.72371	0.390279	-4.41662	1.00257e-05	0.00187916	MPPED2	TM-BeamB	down
2.66826	-2.3124	0.678711	-3.40705	0.000656689	0.0245043	MPPED2-AS1	TM-BeamB	down
73.4491	-1.26999	0.371682	-3.41688	0.000633435	0.0241123	CCDC73	TM-BeamB	down
1036.14	1.34094	0.412367	3.25182	0.0011467	0.0350124	LDLRAD3	TM-BeamB	up
74.3325	-1.07219	0.183507	-5.84278	5.13358e-09	7.41179e-06	ACCS	TM-BeamB	down
38.4251	1.20602	0.314428	3.83559	0.000125265	0.00863762	CSKMT	TM-BeamB	up
13.5317	1.34444	0.403135	3.33495	0.000853142	0.0286455	ENSG00000256789	TM-BeamB	up
42.2764	1.19516	0.374491	3.19142	0.00141576	0.0404763	P4HA3	TM-BeamB	up
3.51752	-3.42386	1.0353	-3.30713	0.000942583	0.0309293	ENSG00000255209	TM-BeamB	down
5.43163	-1.85427	0.529786	-3.50004	0.000465191	0.0201779	LINC02720	TM-BeamB	down
113.019	-1.79886	0.364813	-4.93091	8.18456e-07	0.000300718	MIR4300HG	TM-BeamB	down
35.2148	-1.02085	0.285049	-3.58133	0.000341853	0.0164312	FZD4-DT	TM-BeamB	down
159.82	1.1868	0.363932	3.26105	0.00111	0.0343642	CTSC	TM-BeamB	up
795.855	1.11533	0.238688	4.67274	2.97203e-06	0.000780176	TAF1D	TM-BeamB	up
16.5061	-1.9995	0.47035	-4.25109	2.12736e-05	0.00282897	CNTN5	TM-BeamB	down
5.93834	-1.51025	0.434834	-3.47317	0.000514351	0.0215647	NECTIN1-DT	TM-BeamB	down
98.25	1.02394	0.261824	3.91077	9.2002e-05	0.0069137	TLCD5	TM-BeamB	up
183.893	-1.65573	0.29083	-5.69314	1.24726e-08	1.40061e-05	SORL1	TM-BeamB	down
3399.39	1.13216	0.262986	4.30503	1.6696e-05	0.00249731	MIR100HG	TM-BeamB	up
72.3661	-1.45104	0.271003	-5.35432	8.58798e-08	5.10556e-05	ENSG00000286895	TM-BeamB	down
1432.37	1.24686	0.284685	4.37977	1.18803e-05	0.00204013	A2M	TM-BeamB	up
14.3612	1.29723	0.394728	3.28638	0.00101483	0.0325352	KLRK1-AS1	TM-BeamB	up
7.68706	-2.2575	0.703489	-3.20901	0.00133194	0.0387493	RERGL	TM-BeamB	down
73.0682	-1.15057	0.298975	-3.84837	0.000118905	0.00834523	DNAI7	TM-BeamB	down
3.22309	2.51002	0.717528	3.49815	0.000468495	0.0202344	ENSG00000289928	TM-BeamB	up
9.23389	-2.83045	0.765107	-3.69941	0.000216102	0.0124446	ENSG00000257239	TM-BeamB	down
37.2372	-1.58355	0.351776	-4.5016	6.74428e-06	0.00149804	RAPGEF3	TM-BeamB	down
60.1504	-1.36233	0.334389	-4.07409	4.61947e-05	0.00462244	SLC4A8	TM-BeamB	down
890.897	1.25622	0.406169	3.09285	0.00198245	0.049902	SLC16A7	TM-BeamB	up
17.6864	-3.07699	0.713893	-4.31016	1.6314e-05	0.00246085	WIF1	TM-BeamB	down
14.5221	-1.51494	0.414843	-3.65185	0.000260354	0.0138805	HMGA2-AS1	TM-BeamB	down
9.1027	-1.6622	0.399435	-4.16138	3.16329e-05	0.0037834	LINC01479	TM-BeamB	down
48.3807	-2.30311	0.420116	-5.48208	4.2036e-08	3.71455e-05	IFNG-AS1	TM-BeamB	down
978.899	-1.03682	0.22011	-4.71046	2.47163e-06	0.000703649	PRANCR	TM-BeamB	down
4.72857	-1.85366	0.499799	-3.7088	0.000208241	0.0121684	ENSG00000258168	TM-BeamB	down
137.705	1.16643	0.297204	3.92466	8.68526e-05	0.00675093	PHLDA1	TM-BeamB	up
23.2326	1.50213	0.440726	3.40832	0.000653647	0.024467	PTPRQ	TM-BeamB	up
565.127	1.29605	0.376927	3.43848	0.000584998	0.0231632	BTG1	TM-BeamB	up
43.9144	1.13557	0.243268	4.66798	3.04176e-06	0.000788246	BTG1-DT	TM-BeamB	up
207.171	-1.75082	0.475877	-3.67915	0.000234015	0.0129239	RMST	TM-BeamB	down
5.5299	-2.30977	0.615343	-3.75363	0.000174289	0.0108732	ANO4	TM-BeamB	down
28.7621	-1.32172	0.386629	-3.41856	0.000629532	0.0241123	P2RX7	TM-BeamB	down
17.273	-1.20864	0.331918	-3.64137	0.000271191	0.0143128	HCAR1	TM-BeamB	down
217.402	-1.46542	0.273418	-5.35963	8.33913e-08	5.10556e-05	RIMBP2	TM-BeamB	down
13.8688	-2.74437	0.710993	-3.85991	0.000113431	0.0080799	ENSG00000256209	TM-BeamB	down
21.9341	-1.52787	0.434053	-3.52	0.000431543	0.0192751	MMP17	TM-BeamB	down
23.897	-1.35446	0.344213	-3.93494	8.32184e-05	0.00657067	LINC00621	TM-BeamB	down
148.839	-1.52379	0.357484	-4.26253	2.02123e-05	0.0027346	SGCG	TM-BeamB	down
37.4186	-1.63612	0.388503	-4.21134	2.53855e-05	0.00328968	ENSG00000291041	TM-BeamB	down
5.0828	4.43356	1.19474	3.7109	0.000206527	0.0121684	TEX26-AS1	TM-BeamB	up
50.7433	3.99708	1.09393	3.65386	0.000258326	0.0138136	MEDAG	TM-BeamB	up
17.7815	-2.00041	0.567564	-3.52456	0.000424188	0.0191386	LINC00457	TM-BeamB	down
4.08843	-2.91196	0.762488	-3.81902	0.000133981	0.00887921	LRRC63	TM-BeamB	down
2.54555	-3.09712	0.923539	-3.35354	0.000797852	0.0273339	LINC00648	TM-BeamB	down
34.004	1.57127	0.464348	3.38382	0.000714846	0.0258374	SAMD4A-AS1	TM-BeamB	up
199.671	-1.33662	0.342532	-3.90217	9.5335e-05	0.00705863	PLEKHG3	TM-BeamB	down
10.373	-2.08233	0.480782	-4.33113	1.48346e-05	0.00230655	ENSG00000258847	TM-BeamB	down
448.875	-1.10942	0.309263	-3.58731	0.000334112	0.0163521	RAD51B	TM-BeamB	down
9.59846	1.66914	0.431772	3.8658	0.000110727	0.00796488	ENSG00000287643	TM-BeamB	up
11.3049	-1.8622	0.534744	-3.48243	0.000496894	0.0212236	PGF	TM-BeamB	down
18.6663	-1.58681	0.271276	-5.84942	4.933e-09	7.41179e-06	TMEM63C	TM-BeamB	down
58.4959	-1.51708	0.449893	-3.37208	0.000746027	0.0265017	LINC01550	TM-BeamB	down
7.43379	-1.54776	0.433793	-3.56798	0.000359749	0.0169897	BCL11B	TM-BeamB	down
62.2	-1.06281	0.328419	-3.23613	0.00121164	0.0364446	BEGAIN	TM-BeamB	down
115.035	-1.68516	0.374005	-4.50571	6.61522e-06	0.00148571	DIO3OS	TM-BeamB	down
15.7959	-1.28237	0.36589	-3.50479	0.000456972	0.0199069	TDRD9	TM-BeamB	down
15.4455	-1.32953	0.411413	-3.23161	0.00123093	0.0366973	AHNAK2	TM-BeamB	down
24.7089	-1.48986	0.276274	-5.3927	6.94062e-08	4.55647e-05	ENTREP2	TM-BeamB	down
2658.48	1.93123	0.405412	4.76362	1.90149e-06	0.000573653	FGF7	TM-BeamB	up
8.29773	2.67801	0.60709	4.41122	1.02788e-05	0.00188878	ENSG00000259188	TM-BeamB	up
106.389	-1.34598	0.370865	-3.6293	0.000284189	0.0146298	UNC13C	TM-BeamB	down
24.8763	1.06665	0.337727	3.15833	0.00158677	0.0435425	ENSG00000261544	TM-BeamB	up
22.539	-1.11459	0.272737	-4.08668	4.37594e-05	0.0044899	TMEM266	TM-BeamB	down
24.3203	1.0714	0.2708	3.95644	7.60743e-05	0.00622547	ENSG00000259986	TM-BeamB	up
2973.8	-1.04205	0.244454	-4.26277	2.01905e-05	0.0027346	ADAMTSL3	TM-BeamB	down
2.50797	2.63342	0.848063	3.10521	0.00190143	0.04865	ENSG00000259544	TM-BeamB	up
4.23711	-3.54703	1.05607	-3.35871	0.000783082	0.0272423	CRAT37	TM-BeamB	down
5.20773	-2.5764	0.623346	-4.13318	3.57776e-05	0.00404221	ENSG00000259199	TM-BeamB	down
9.29349	-1.69304	0.439189	-3.85493	0.000115762	0.00821014	LINC01569	TM-BeamB	down
36.0055	-1.17216	0.297351	-3.94202	8.07983e-05	0.0064728	VWA3A	TM-BeamB	down
18.6396	-1.71229	0.393498	-4.35146	1.35234e-05	0.00216943	GSG1L	TM-BeamB	down
94.7976	-1.02546	0.2667	-3.84499	0.000120558	0.00840942	BCL7C	TM-BeamB	down
345.429	-1.14234	0.311951	-3.66191	0.000250337	0.0135296	NKD1	TM-BeamB	down
1282.9	1.69901	0.520084	3.26679	0.00108774	0.0341797	MT2A	TM-BeamB	up
6.54611	2.72807	0.870184	3.13505	0.00171822	0.0459116	ENSG00000260823	TM-BeamB	up
26.7989	2.98371	0.947943	3.14756	0.00164639	0.0446091	MT1JP	TM-BeamB	up
52.9298	2.14533	0.566538	3.78675	0.000152633	0.00982541	MT1A	TM-BeamB	up
415.811	2.10226	0.614813	3.41935	0.000627719	0.0241123	MT1X	TM-BeamB	up
11.3614	-1.70534	0.496521	-3.43458	0.000593479	0.0233385	KCTD19	TM-BeamB	down
19.822	-1.93775	0.356735	-5.43191	5.57525e-08	4.02473e-05	LRRC36	TM-BeamB	down
3.46276	-4.07895	1.13629	-3.58971	0.000331044	0.0162413	LINC02136	TM-BeamB	down
7.0828	-1.78315	0.503122	-3.54418	0.000393832	0.0181747	CLEC3A	TM-BeamB	down
24.8446	-1.08571	0.346967	-3.12914	0.00175318	0.0463019	MAFTRR	TM-BeamB	down
66.7699	-1.18262	0.266829	-4.43214	9.33008e-06	0.00177914	PKD1L2	TM-BeamB	down
68.5756	1.04505	0.261223	4.0006	6.31819e-05	0.00552855	ENSG00000285848	TM-BeamB	up
23.5431	-1.33221	0.36675	-3.63246	0.000280733	0.0145344	ZFPM1-AS1	TM-BeamB	down
29.8889	-1.11612	0.342929	-3.25467	0.00113525	0.0347679	SPIRE2	TM-BeamB	down
36.985	-2.11648	0.498095	-4.24915	2.14585e-05	0.0028349	DOC2B	TM-BeamB	down
17.2387	-1.89768	0.514821	-3.68609	0.000227728	0.0126806	ASPA	TM-BeamB	down
49.0361	-1.03403	0.324775	-3.18383	0.00145343	0.0411885	TRPV1	TM-BeamB	down
60.5574	1.32617	0.381398	3.47714	0.000506801	0.0214336	VMO1	TM-BeamB	up
15.4181	-1.21564	0.365617	-3.32489	0.000884549	0.0295039	SLFN12L	TM-BeamB	down
67.7543	-1.94462	0.526465	-3.69372	0.000220994	0.0124961	STAC2	TM-BeamB	down
70.1766	-2.19858	0.643786	-3.41508	0.000637628	0.0241657	PPP1R1B	TM-BeamB	down
177.199	-1.67243	0.364107	-4.59322	4.36458e-06	0.00106291	ARL17B	TM-BeamB	down
14.4937	-1.45183	0.448908	-3.23414	0.00122012	0.03659	TMEM92-AS1	TM-BeamB	down
54.7719	-1.13635	0.219897	-5.16764	2.37064e-07	0.000119794	ACSF2	TM-BeamB	down
18.0776	-2.06778	0.60694	-3.40689	0.000657069	0.0245043	ENSG00000290457	TM-BeamB	down
17.0265	-1.56866	0.466972	-3.35921	0.000781659	0.0272408	ENSG00000285877	TM-BeamB	down
11.6166	1.37179	0.388567	3.53038	0.000414959	0.0188909	KPNA2	TM-BeamB	up
157.559	-1.12199	0.318587	-3.52177	0.00042867	0.0192122	MAP2K6	TM-BeamB	down
3.29494	2.16004	0.685466	3.15119	0.00162606	0.0441175	ENSG00000287193	TM-BeamB	up
248.429	-1.08738	0.220678	-4.92744	8.33138e-07	0.000300718	ARHGAP28	TM-BeamB	down
91.3606	-1.57182	0.421228	-3.73152	0.000190326	0.0114156	LINC01902	TM-BeamB	down
148.581	-1.01452	0.294242	-3.44793	0.000564905	0.0227459	SLC14A2-AS1	TM-BeamB	down
28.8162	-2.08302	0.484223	-4.30178	1.69435e-05	0.00249731	MRO	TM-BeamB	down
8.85509	-2.35277	0.745304	-3.15679	0.00159514	0.04363	DYNAP	TM-BeamB	down
47.5155	-2.35411	0.491908	-4.78567	1.7042e-06	0.000546776	RAB27B	TM-BeamB	down
5.48764	-2.09132	0.53032	-3.94351	8.02985e-05	0.00646643	ENSG00000288828	TM-BeamB	down
30.3286	-1.04201	0.334172	-3.11818	0.0018197	0.0475829	RBFADN	TM-BeamB	down
8.94256	-1.76915	0.514004	-3.4419	0.000577638	0.0230747	ENSG00000267749	TM-BeamB	down
143.951	-1.06601	0.307479	-3.46695	0.000526407	0.021692	ZNF846	TM-BeamB	down
64.8786	-1.37721	0.34848	-3.95205	7.74847e-05	0.00628996	OLFM2	TM-BeamB	down
5.53522	-2.79234	0.756386	-3.69168	0.000222775	0.0124961	PALM3	TM-BeamB	down
105.817	-3.74355	0.41072	-9.1146	7.89609e-20	1.59604e-15	CPAMD8	TM-BeamB	down
71.0614	-1.06076	0.246681	-4.30011	1.70713e-05	0.00249731	SLC27A1	TM-BeamB	down
59.9929	-1.98873	0.617802	-3.21903	0.00128624	0.0378438	IQCN	TM-BeamB	down
51.9499	-1.02995	0.251893	-4.08886	4.335e-05	0.00447058	PBX4	TM-BeamB	down
6.45462	-1.57892	0.426908	-3.6985	0.000216879	0.0124539	LINC01858	TM-BeamB	down
11.2742	-2.0809	0.416747	-4.99321	5.93831e-07	0.000235355	SLC7A10	TM-BeamB	down
16.7346	-1.27597	0.285921	-4.46266	8.09484e-06	0.00160827	CAPN12	TM-BeamB	down
5.9811	-1.65044	0.481133	-3.43032	0.000602872	0.023616	ENSG00000267892	TM-BeamB	down
2.75715	-2.61107	0.806655	-3.23691	0.00120832	0.036399	ENSG00000205041	TM-BeamB	down
2.48188	4.74621	1.13305	4.18887	2.80347e-05	0.0034963	ENSG00000289298	TM-BeamB	up
3.83142	2.67684	0.715714	3.7401	0.000183949	0.0112331	ENSG00000289115	TM-BeamB	up
2.68961	3.53568	1.07756	3.28119	0.00103371	0.0329339	ENSG00000286669	TM-BeamB	up
73.2399	-1.96885	0.314315	-6.26394	3.7538e-10	9.48446e-07	COX6B2	TM-BeamB	down
16.7384	-1.19085	0.367475	-3.24064	0.00119263	0.03598	ANGPT4	TM-BeamB	down
5.937	-1.73175	0.552463	-3.1346	0.00172088	0.0459116	TMEM74B	TM-BeamB	down
33.6827	-2.25522	0.562845	-4.00682	6.15404e-05	0.00542238	SLC4A11	TM-BeamB	down
28.6531	1.64046	0.285225	5.75146	8.84752e-09	1.11772e-05	SNAP25-AS1	TM-BeamB	up
126.168	1.45339	0.391357	3.71372	0.000204233	0.0120706	SNAP25	TM-BeamB	up
202.564	-1.01036	0.310648	-3.25243	0.00114421	0.0349892	MACROD2	TM-BeamB	down
18.1554	1.26845	0.408235	3.10715	0.00188898	0.0484542	NXT1	TM-BeamB	up
9.01111	-1.67363	0.477442	-3.50541	0.000455911	0.019904	SYNDIG1	TM-BeamB	down
36.5795	-1.06518	0.292923	-3.63637	0.000276504	0.0144418	SLC2A4RG	TM-BeamB	down
13.6162	1.32976	0.354524	3.75083	0.000176248	0.0109288	ENSG00000280164	TM-BeamB	up
1467.38	1.01909	0.283297	3.59726	0.000321582	0.0159593	NRIP1	TM-BeamB	up
15.4307	1.50791	0.443654	3.39884	0.000676719	0.0249608	ENSG00000231201	TM-BeamB	up
59.158	-1.68306	0.39289	-4.28379	1.83737e-05	0.00259149	CHODL	TM-BeamB	down
695.393	1.76783	0.387212	4.56553	4.98223e-06	0.00117315	ADAMTS1	TM-BeamB	up
63.8177	-1.01944	0.260917	-3.90716	9.33867e-05	0.0069654	MAP3K7CL	TM-BeamB	down
6.42607	-1.47173	0.415057	-3.54585	0.000391344	0.0181028	LINC00310	TM-BeamB	down
13.807	-1.4351	0.342289	-4.19265	2.75716e-05	0.0034963	ENSG00000214955	TM-BeamB	down
11.6532	2.15312	0.659824	3.26318	0.00110171	0.0342597	ENSG00000286153	TM-BeamB	up
780.69	1.26305	0.349185	3.61714	0.000297879	0.0151695	COL18A1	TM-BeamB	up
28.8724	-1.23875	0.363687	-3.40609	0.000658996	0.0245197	DGCR5	TM-BeamB	down
10.4949	-1.41844	0.393028	-3.609	0.000307374	0.0154795	ARVCF	TM-BeamB	down
7.86622	-1.72337	0.521739	-3.30312	0.000956139	0.0311717	P2RX6	TM-BeamB	down
8.91245	-1.86059	0.467515	-3.97974	6.89896e-05	0.00588391	ENSG00000290920	TM-BeamB	down
45.0465	-1.25427	0.324626	-3.86373	0.000111667	0.00800396	EMID1	TM-BeamB	down
6.43803	-1.78643	0.495581	-3.60472	0.000312488	0.0156733	SLC5A4-AS1	TM-BeamB	down
12.9698	-1.46158	0.350889	-4.16535	3.10876e-05	0.00376272	NPTXR	TM-BeamB	down
24.3606	-1.1282	0.309506	-3.64515	0.000267233	0.0141774	TTLL1	TM-BeamB	down
8.32091	-1.74375	0.494872	-3.52364	0.000425656	0.0191621	XG	TM-BeamB	down
97.5593	-1.46004	0.427265	-3.41719	0.000632719	0.0241123	HCCS-DT	TM-BeamB	down
2744.57	1.64159	0.530585	3.09392	0.00197531	0.0498201	SAT1	TM-BeamB	up
38.442	1.26677	0.270165	4.68886	2.74729e-06	0.000753031	KLHL15	TM-BeamB	up
50.2985	-1.23889	0.338546	-3.65944	0.000252771	0.0135885	SRPX	TM-BeamB	down
41.6553	-1.23981	0.36947	-3.35564	0.000791808	0.0272879	FAAH2	TM-BeamB	down
39.9341	-1.5139	0.376208	-4.0241	5.71941e-05	0.005161	FRMPD3	TM-BeamB	down
31.4851	-1.47115	0.273155	-5.38577	7.21353e-08	4.55647e-05	LINC01285	TM-BeamB	down
134.747	-2.15796	0.334321	-6.45473	1.08409e-10	3.60121e-07	GRIA3	TM-BeamB	down
28.0744	-1.04071	0.33388	-3.11703	0.00182686	0.0476005	MCF2	TM-BeamB	down
8.395	1.14018	0.362449	3.14578	0.00165645	0.0448217	ZFP92	TM-BeamB	up
18.6423	-1.0449	0.264369	-3.95243	7.73622e-05	0.00628996	PLXNA3	TM-BeamB	down
24.9019	-1.71361	0.537734	-3.18672	0.00143897	0.041024	ENSG00000229308	TM-BeamB	down
24.8014	-1.52301	0.325073	-4.68513	2.79781e-06	0.000754028	ENSG00000271254	TM-BeamB	down
12.9516	-1.86886	0.421458	-4.43428	9.2382e-06	0.0146663	SLC7A14-AS1	TM-CS	down
210.035	-1.58025	0.332757	-4.74897	2.04457e-06	0.00568032	LAMB1	TM-CS	down
22.675	1.50037	0.322522	4.65198	3.28767e-06	0.00730719	BTG1	TM-CS	up
15.7155	2.06815	0.492402	4.20013	2.66761e-05	0.032939	SERPINA3	TM-CS	up
54.9406	-1.33219	0.324697	-4.10287	4.0806e-05	0.0412252	DNM2	TM-CS	down
34.1528	-2.46013	0.378407	-6.50129	7.96354e-11	8.84988e-07	CPAMD8	TM-CS	down
38.0071	1.52968	0.334504	4.57297	4.80869e-06	0.00890649	SAT1	TM-CS	up
10.4468	-1.18685	0.328924	-3.60829	0.000308219	0.033327	PLEKHG5	TM-Fib	down
147.072	1.09187	0.158453	6.89086	5.54557e-12	2.65836e-08	ERRFI1	TM-Fib	up
10.985	1.33609	0.372845	3.5835	0.000339021	0.0350308	MAD2L2	TM-Fib	up
13.6208	1.41832	0.395862	3.58287	0.00033984	0.0350308	ENSG00000225313	TM-Fib	up
3.99918	4.32841	1.06369	4.06922	4.71706e-05	0.0105994	ENSG00000287400	TM-Fib	up
69.056	-1.01522	0.260897	-3.89126	9.97255e-05	0.0168724	DAB1	TM-Fib	down
8.45606	-1.48372	0.415074	-3.57459	0.000350771	0.0350308	CRB1	TM-Fib	down
43.2531	-2.14457	0.392393	-5.46538	4.61924e-08	5.53577e-05	KCNH1	TM-Fib	down
55.7896	-1.44803	0.342733	-4.22495	2.38991e-05	0.00722075	ESRRG	TM-Fib	down
34.8752	-1.29935	0.297194	-4.37205	1.23086e-05	0.00465814	DNAH14	TM-Fib	down
14.5173	-1.50023	0.394804	-3.79994	0.000144728	0.0210236	CATSPERE	TM-Fib	down
85.9703	-1.21458	0.323822	-3.75077	0.000176292	0.0239176	KIF26B	TM-Fib	down
46.6574	1.29006	0.32631	3.95348	7.70227e-05	0.014277	ID2	TM-Fib	up
4.32729	-2.2629	0.572296	-3.95407	7.68316e-05	0.014277	CYS1	TM-Fib	down
25.6046	-1.58639	0.32126	-4.93802	7.89197e-07	0.000610432	VIT	TM-Fib	down
3.80325	-2.60129	0.647333	-4.01847	5.85778e-05	0.0122088	ENSG00000286739	TM-Fib	down
18.9389	-2.02347	0.472875	-4.27907	1.87675e-05	0.006134	DNAH6	TM-Fib	down
102.56	1.32107	0.334612	3.94806	7.87857e-05	0.014277	MAT2A	TM-Fib	up
20.8777	-1.34991	0.38694	-3.48868	0.000485409	0.0429646	LSP1P5-1	TM-Fib	down
6.74683	2.92159	0.693278	4.21417	2.50702e-05	0.00735784	IL1R2	TM-Fib	up
6.54818	2.63495	0.700354	3.76231	0.000168352	0.0232795	IL1RL1	TM-Fib	up
14.934	-1.13028	0.322445	-3.50533	0.00045604	0.0412064	FBLN7	TM-Fib	down
33.4068	1.57217	0.396836	3.96176	7.43986e-05	0.014277	CLASP1-AS1	TM-Fib	up
89.9525	-1.77076	0.410063	-4.31826	1.57261e-05	0.00551602	NEB	TM-Fib	down
12.6361	-1.99966	0.513784	-3.89201	9.94154e-05	0.0168724	CCDC148	TM-Fib	down
27.3933	-1.02246	0.288354	-3.54585	0.000391346	0.0372059	CSRNP3	TM-Fib	down
148.661	-1.38217	0.376839	-3.6678	0.000244651	0.0292115	TTN	TM-Fib	down
6.72566	-2.2044	0.604672	-3.64561	0.000266756	0.0304461	CCDC141	TM-Fib	down
88.1114	-2.65773	0.448732	-5.92276	3.1659e-09	6.50411e-06	TMEFF2	TM-Fib	down
32.2714	-1.14398	0.315629	-3.62444	0.000289586	0.0322832	C2CD6	TM-Fib	down
20.3398	1.82704	0.432634	4.22306	2.4101e-05	0.00722075	SLC11A1	TM-Fib	up
7.20824	3.0263	0.829288	3.64927	0.000262984	0.0302558	SCG2	TM-Fib	up
11.1382	1.83991	0.400505	4.59398	4.34877e-06	0.00231628	ERFE	TM-Fib	up
12.4174	-1.51359	0.418044	-3.62065	0.000293861	0.0324068	CNTN6	TM-Fib	down
9.1252	-1.92403	0.47059	-4.08855	4.34078e-05	0.0099087	SLC6A1	TM-Fib	down
119.989	-1.05567	0.297828	-3.54457	0.000393248	0.0372059	SLC6A6	TM-Fib	down
6.34278	1.95837	0.561942	3.48501	0.000492118	0.0429646	CISH	TM-Fib	up
196.341	-1.22375	0.276863	-4.42007	9.86708e-06	0.00405424	LSAMP	TM-Fib	down
53.6939	-1.24103	0.280669	-4.42168	9.79375e-06	0.00405424	LINC03051	TM-Fib	down
4.45664	-2.15247	0.598264	-3.59786	0.000320849	0.0342354	P2RY12	TM-Fib	down
322.874	1.96967	0.352856	5.58208	2.37665e-08	3.41787e-05	RARRES1	TM-Fib	up
7.45445	-2.74867	0.714753	-3.84562	0.000120249	0.0189544	ENSG00000223930	TM-Fib	down
23.1505	-1.1026	0.298059	-3.69927	0.000216222	0.0275176	MCF2L2	TM-Fib	down
22.5874	-1.46111	0.353439	-4.13399	3.56521e-05	0.00896284	ENSG00000290888	TM-Fib	down
36.915	-1.4363	0.315515	-4.55222	5.30819e-06	0.00272632	STX18-AS1	TM-Fib	down
124.35	-1.6202	0.328388	-4.93379	8.06495e-07	0.000610432	LDB2	TM-Fib	down
22.1562	-2.08258	0.525757	-3.96111	7.46032e-05	0.014277	STPG2	TM-Fib	down
166.369	-1.20976	0.294938	-4.10174	4.10058e-05	0.00966727	COL25A1	TM-Fib	down
268.681	-1.07383	0.281468	-3.81511	0.000136123	0.0203914	LIFR	TM-Fib	down
18.0838	-1.78628	0.499525	-3.57595	0.000348955	0.0350308	PRDM6	TM-Fib	down
128.62	-1.15347	0.319517	-3.61003	0.000306164	0.033327	ALDH7A1	TM-Fib	down
34.8063	-1.11452	0.260794	-4.27355	1.92386e-05	0.00614824	MIR3936HG	TM-Fib	down
5.73255	-2.3425	0.626324	-3.74007	0.00018397	0.024497	ENSG00000249738	TM-Fib	down
38.2379	-1.69769	0.288269	-5.88927	3.87915e-09	6.97325e-06	LINC03000	TM-Fib	down
17.0183	-1.67496	0.424861	-3.94237	8.06808e-05	0.0143243	ENSG00000253693	TM-Fib	down
96.9278	-1.96679	0.299028	-6.57728	4.79136e-11	1.72261e-07	KCNIP1	TM-Fib	down
159.413	1.00313	0.267965	3.74351	0.000181465	0.0243893	DUSP1	TM-Fib	up
83.9391	1.35561	0.32606	4.15754	3.21689e-05	0.00856705	HSPA1A	TM-Fib	up
109.869	-1.00921	0.275279	-3.66615	0.000246226	0.0292115	ENSG00000225096	TM-Fib	down
24.2881	-1.5263	0.363979	-4.19337	2.74842e-05	0.00761025	ENSG00000287683	TM-Fib	down
9.00369	-1.82076	0.425048	-4.28366	1.8384e-05	0.006134	AGMO	TM-Fib	down
30.7983	1.78509	0.325999	5.47576	4.35649e-08	5.53577e-05	INHBA	TM-Fib	up
23.5148	-1.15876	0.287235	-4.03417	5.47953e-05	0.0117614	LINC00174	TM-Fib	down
10.0063	-1.89774	0.505356	-3.75525	0.000173166	0.0237172	MLXIPL	TM-Fib	down
[truncated: 689 more rows]
