# Supplementary material for: Transcriptomic Atlas of Human Trabecular Meshwork Uncovers the Cellular Landscape and Provides Insights into Glaucoma Pathophysiology
Source: Research Square preprint supplement (doi:10.21203/rs.3.rs-9540265/v1), 2026-06-22

scEndo - SMAD1

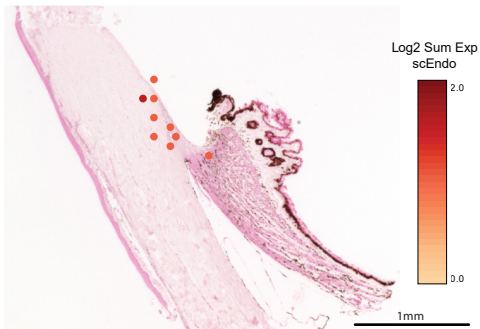

vEndo - FLT1, VWF, SEC14L1

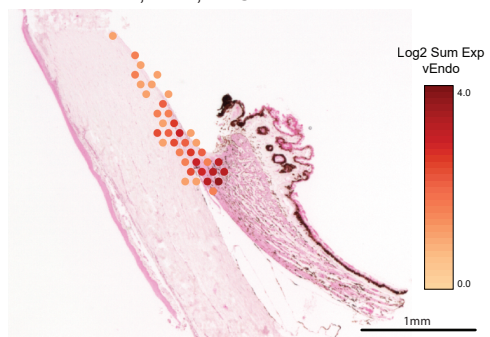

Melanocytes - DCT, MLANA, TYRP1

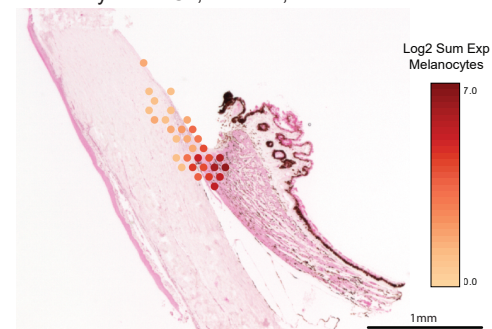

Pericytes - PDGFRB, TRPC4

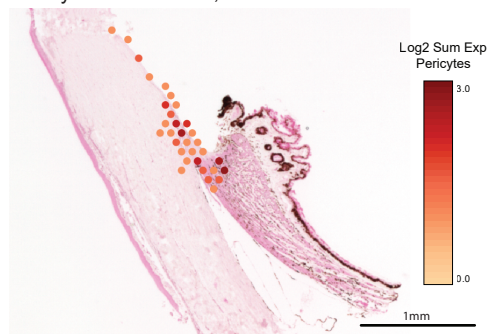

Schmy - MPZ

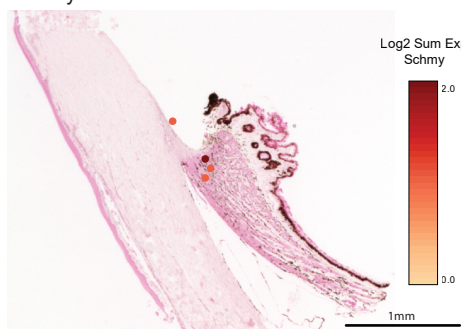

SchNmy - SCN7A

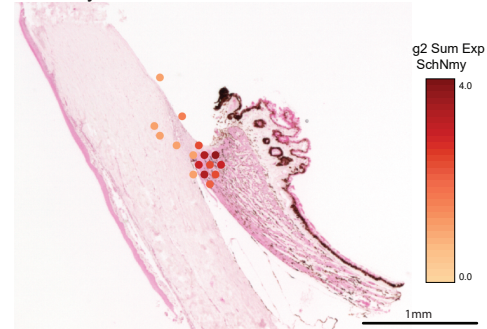

Mast cells - KIT, CPA3

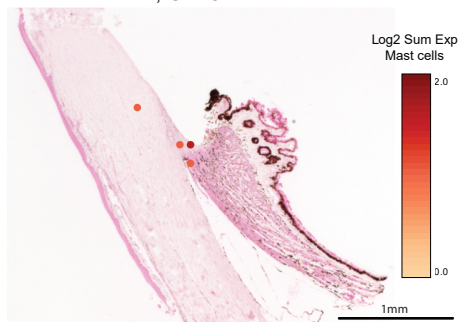

T/NK cells - IL7R

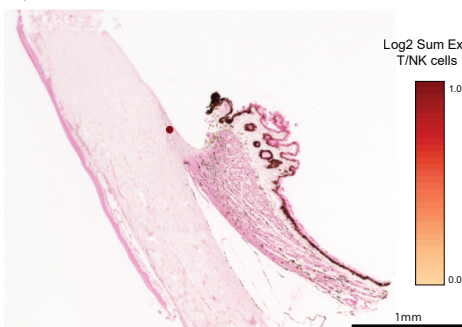

Macrophages - CD163

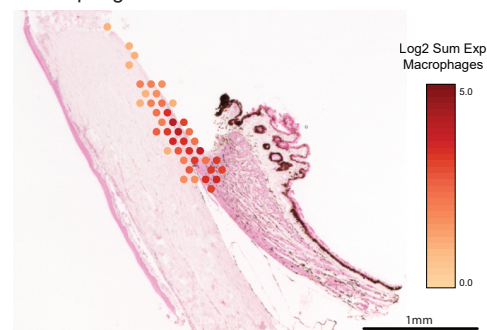

Supplement: Supplementary file 1 [file 1856cfb760675a562b2f2d47.pdf]
