# Supplementary material for: Transcriptomic Atlas of Human Trabecular Meshwork Uncovers the Cellular Landscape and Provides Insights into Glaucoma Pathophysiology
Source: Research Square preprint supplement (doi:10.21203/rs.3.rs-9540265/v1), 2026-06-22
Supplement: Supplementary file 2 [file 1f4f1bbe54654bf9ba8563f0.docx]

Supplementary Information for

**Transcriptomic Atlas of Human Trabecular Meshwork Uncovers the Cellular Landscape and Provides Insights into Glaucoma Pathophysiology**

Prakadeeswari Gopalakrishnan1,5, Pei Tan3,5, Sarahi Rios Arguello1,2, Michael Nahmou1,2, Zaid Ahmed1, Linya Li1, Yogapriya Sundaresan1, Balasankara Reddy Kaipa1, Lauren MacDonnell1,2, Jinjing Jian1, Mai-Linh Ton1, Rui Chen1,2, Xiangmin Xu3,4,Gulab S. Zode1,2,#

1Department of Ophthalmology, Brunson Center for Translational Vision Research, Gavin Herbert Eye Institute, University of California, Irvine, CA, USA

2Department of Physiology and Biophysics, School of Medicine, University of California, Irvine, CA, USA

3Department of Anatomy and Neurobiology, University of California, Irvine, CA, USA, 4Department of Biomedical Engineering, University of California Irvine, CA, USA

5These authors contributed equally to this work

#Correspondence and requests for materials should be addressed to Gulab S. Zode. email: gzode@hs.uci.edu

**This word file includes:**

**Supplementary figures and legends**

**Other supplementary materials for this manuscript include the following:**

***Supplementary Methods***

- Visium spatial transcriptomics
- Human donor eye tissue handling, processing, and paraffin embedding
- Immunohistochemistry on paraffin-embedded human tissue sections

***Supplementary Results***

- Differential gene expression and pathway enrichment in other TM cell populations.
- Additional pathway signatures underlying TM remodeling in GTM.

***Supplementary Methods:***

***Visium spatial transcriptomics:*** Tissue slide containing one healthy human TM sections were prepared as described in the 10x Genomics Demonstrated Protocol (CG000520) and the Visium CytAssist Spatial Gene Expression Reagents Kits User Guide (CG000495). In brief, slides were incubated at 60 °C for 2 h, deparaffinized, and stained with H&E. Following imaging, coverslips were removed, and tissues were destained and decrosslinked in the Visium CytAssist Tissue Slide Cassette with 6.5 mm gaskets. The human transcriptome probe panel v2 was hybridized to the tissue for 20 h, followed by ligation of probe pairs. Ligation products were released from the tissue upon RNase treatment and captured on the Visium slide using the CytAssist instrument. Spatially barcoded ligation products were generated by extension and amplified prior to probe-based library construction. Libraries were quantified using KAPA qPCR, assessed on an Agilent Bioanalyzer DNA High Sensitivity chip, normalized, and sequenced using paired-end 100-cycle chemistry on an Illumina NovaSeq 6000. The Visium slide was visualized via Loupe Browser (v9.0.0).

***Human donor eye tissue handling, processing, and paraffin embedding:*** Upon receipt, human donor eye globes were rinsed twice in povidone-iodine (betadine) solution, followed by two washes in PBS. Globes were placed on a PBS-moistened sterile gauze in a Petri dish, and any remaining extraocular muscle tissue was gently removed. The anterior segment was carefully separated from the posterior segment, and the lens and iris were excised. Dissected tissues were fixed in 4% paraformaldehyde (PFA) for 72 hours at 4°C. Following fixation, tissues were rinsed in PBS or 70% ethanol before standard paraffin embedding. Tissues were processed using an automated tissue processor (Leica TP1020, Leica Microsystems, Wetzlar, Germany). Samples were dehydrated through a graded ethanol series consisting of 70% ethanol for 1 h, 80% ethanol for 1 h, two changes of 95% ethanol for 45 min each, and two changes of 100% ethanol for 1 h each. Tissues were subsequently cleared in xylene for two consecutive 1 h steps and infiltrated with molten paraffin wax for two consecutive 1 h steps. Paraffin embedding was performed using a Leica HistoCore Arcadia embedding station (Leica Microsystems, Wetzlar, Germany), comprising a heated embedding workstation and an integrated cold plate to allow controlled tissue orientation followed by rapid paraffin block solidification. Paraffin blocks were stored at room temperature (RT) until sectioning. Sections were cut at a thickness of 8 µm, with one section per slide, as described in our previous study1. H&E staining was performed using a commercial kit (Abcam, ab245880) according to the manufacturer’s instructions.

***Immunohistochemistry on paraffin-embedded human tissue sections:*** Paraffin-embedded human tissue sections were baked at 70 °C for 2 h, then deparaffinized in three changes of xylene (5 min each) and rehydrated through graded ethanol washes (100%, 95%, 70%, 50%; 5 min each), followed by a PBS rinse (10 min). Antigen retrieval was performed in 1X citrate buffer (pH 6.0; freshly prepared from 0.25 M sodium citrate tribasic and 0.05 M citric acid) for 90 min at 70 °C, followed by 10–15 min at RT in fresh buffer. Sections were blocked with 10% goat serum and 2% Triton X-100 in PBS for 2 h at RT. Primary antibodies were applied in blocking buffer (150 µL per section) and incubated overnight at 4 °C. After three PBS washes (10 -15 min each), secondary antibodies were applied for 2 h at RT, followed by three additional PBS washes. Sections were counterstained with DAPI in mounting medium (Vectashield, Newark, CA) and sealed with nail polish after 30 min. Slides were stored at 4 °C overnight prior to imaging. All incubations were performed in a humidified chamber to prevent tissue drying.Fluorescent imaging was performed using a Leica DMI8 inverted microscope equipped with an SP8 confocal module (Leica Microsystems, Wetzlar, Germany) and a 63x objective as described previously1,2. Fluorescence intensity of human ocular tissue was quantified using the measurement function in ImageJ. The TM, including Schlemm’s canal, was manually outlined and designated as the region of interest (ROI). Total raw pixel intensity within the ROI was measured and normalized to the number of DAPI-stained nuclei to calculate fluorescence intensity per cell.

***Supplementary Results:***

***Differential gene expression and pathway enrichment in other TM cell populations***: The overall analyses of other cell populations are summarized as follows.

1. **CM** cells exhibited 517 DE genes in the GTM group (Supplementary Fig. 7a; Supplementary Table 5), with significant enrichment in pathways related to detoxification and stress responses to copper ions, chaperone cofactor–dependent protein refolding, endoplasmic reticulum (ER) chaperone complexes, protein folding chaperone complexes, serine-type peptidase complexes, prostaglandin receptor activity, MAP kinase tyrosine phosphatase activity, and protein tyrosine/threonine phosphatase activity (Supplementary Fig. 7b; Supplementary Table 6).
2. **vsEndo** cells displayed 114 DE genes (Supplementary Fig. 7c; Supplementary Table 5), characterized by upregulated enrichment of pathways involved in iron import into cells, detoxification of copper ions, cis-Golgi network membrane organization, peptidase inhibitor complexes, CatSper complexes, cytoplasmic side of the lysosomal membrane, iron ion and glycine transmembrane transporter activity, and intramolecular phosphotransferase activity. Meanwhile, prostaglandin receptor activity, prostanoid receptor activity, and exocyst components were downregulated (Supplementary Fig. 7d; Supplementary Table 6). In contrast, **scEndo** cells showed only one DE gene, with significant upregulation of Transmembrane 4 L Six Family Member 1 (*TM4SF1*) (Supplementary Fig. 7e; Supplementary Table 5), which was associated with enhanced blastocyst formation and development (Supplementary Fig. 7f; Supplementary Table 6)
3. **Pericytes** did not exhibit any DEGs between GTM and NTM, and consequently, no significantly enriched pathways were identified (Supplementary Fig. 7g; Supplementary Table 5 & 6).
4. **SchNmy** cells exhibited only 137 DEGs (Supplementary Fig. 8a; Supplementary Table 5) whereas **Schmy** cells showed 9 DEGs (Supplementary Fig. 8b; Supplementary Table 5). In SchNmy cells, downregulated pathways were associated with fibrillar collagen trimers, banded collagen trimer complexes, the NADPH oxidase complex, superoxide-generating NAD(P)H oxidase activity, neurotransmitter receptor transport, and endosome-to-postsynaptic membrane trafficking. Conversely, upregulated pathways included aggresome formation, cytolytic granules, the BLOC-1 complex, ribbon synapse organization, protein-containing complex destabilizing activity, protein tyrosine/threonine phosphatase activity, mitogen-activated protein kinase kinase binding, and MAP kinase tyrosine phosphatase activity (Supplementary Fig. 8d; Supplementary Table 6). In Schmy cells, downregulated pathways included regulation of organelle transport along microtubules, dense-core granule cytoskeletal transport, calmodulin binding, microtubule and tubulin binding, and dense-core granule transport. Upregulated pathways in Schmy cells involved regulation of autophagosome maturation, mediator complex activity, PML body formation, and fatty acid transmembrane transporter activity (Supplementary Fig. 8e; Supplementary Table 6).
5. **Melanocytes** exhibited 125 DEGs (Supplementary Fig. 8c; Supplementary Table 5), with upregulated enrichment of complement-dependent cytotoxicity, negative regulation of thymocyte apoptotic processes, complement component C3b binding, serine-type endopeptidase complexes, glutamate-gated calcium ion channel activity, and polyamine transmembrane transporter activity. In contrast, downregulated enrichment was observed for protein O-linked serine and threonine glycosylation, protein serine/threonine phosphatase complexes, protein serine/threonine kinase binding, neurofilament organization, protein phosphatase type 2A complexes, chemotaxis toward fibroblast growth factor and its regulation, and G protein-coupled purinergic nucleotide receptor activity (Supplementary Fig. 8f; Supplementary Table 6).
6. **Immune** cells exhibited distinct patterns of differential expressions. Macrophages had 133 DEGs (Supplementary Fig. 9a; Supplementary Table 5). Pathways that were upregulated included chaperone cofactor-dependent protein refolding, endoplasmic reticulum chaperone complexes, c-Jun N-terminal kinase (JNK) kinase activity, and transcription regulator activator activity. In contrast, pathways that were downregulated encompassed skeletal myofibril assembly, striated muscle thin filament, myofilament, presynaptic active zone cytoplasmic components, high voltage–gated calcium channel activity, tropomyosin binding, structural molecule activity conferring elasticity, Calyx of Held, and neuronal action potential propagation (Supplementary Fig. 9d; Supplementary Table 6). Mast cells exhibited 235 DEGs (Supplementary Fig. 9b; Supplementary Table 5). Among the upregulated pathways were dense-core granule exocytosis, negative regulation of cell division, NK/T cell activation, neuronal dense-core vesicles, intercellular bridges, dense-core granule localization, autophagosome membranes, manganese ion binding, SNARE complex, and SNAP receptor activity. Downregulated pathways included collagen-activated signaling, protein complexes involved in cell–matrix adhesion, collagen trimer complexes, CatSper complexes, glutamate-gated receptor activity, and MAP kinase kinase kinase binding (Supplementary Fig. 9e; Supplementary Table 6). T/NK cells had 2 DEGs (Supplementary Fig. 9c; Supplementary Table 5). Enrichment of upregulated pathways was observed in aggresomes, inclusion bodies, protein-containing complex destabilizing activity, ATP-dependent protein folding chaperones, protein folding chaperones, and exogenous protein binding. Pathways showing downregulation involved protein - DNA complex assembly, chromatin remodeling at the centromere, inner kinetochore, and CENP-A - containing chromatin assembly (Supplementary Fig. 9f; Supplementary Table 6).

***Additional pathway signatures underlying TM remodeling in GTM:***

***Shear stress, wound healing, and outflow tract morphogenesis pathways:***

Shear stress, wound healing, and outflow tract morphogenesis pathways were differentially enriched across TM cell populations in GTM Shear stress-related pathways were enriched in TM-JCT and TM-Fib cells**,** including response to fluid shear stress**,** cellular response to fluid shear stress**,** and response to laminar fluid shear stress (Supplementary Fig. 14a-b)**.** Consistent with these pathway alterations, the shear stress-responsive transcription factor gene *KLF2* showed increased expression in TM-JCT and TM-Fib cells, while the inflammatory mediator gene *PTGS2* also exhibited elevated expression in TM-JCT cells (Supplementary Fig. 14e)**.**

Wound healing-related pathways were enriched in TM-BeamA cells, including wound healing, spreading of cells and epiboly involved in wound healing, both showing downregulation (Supplementary Fig. 14c). Representative genes associated with this pathway, including *FERMT1* and *TMEFF2*, also demonstrated reduced expression across TM populations, with particularly strong downregulation observed for *TMEFF2* in TM-Myo, TM-Fib, and TM-Uveal cells (Supplementary Fig. 14f)**.**

Outflow tract morphogenesis pathways showed enrichment in mast cells, including outflow tract morphogenesisandoutflow tract septum morphogenesis (Supplementary Fig. 14d)**.** Correspondingly, representative genes associated with this pathway displayed differential expression across TM and immune-related cell populations. The receptor tyrosine kinase gene *FGFR2* showed reduced expression across several TM populations, whereas *TGFB2* and *DHRS3* exhibited variable expression patterns across TM and associated immune cell types (Supplementary Fig. 14g).

***References***

1 Peters, J. C., Bhattacharya, S., Clark, A. F. & Zode, G. S. Increased Endoplasmic Reticulum Stress in Human Glaucomatous Trabecular Meshwork Cells and Tissues. *Invest Ophthalmol Vis Sci* **56**, 3860–3868 (2015). <https://doi.org/10.1167/iovs.14-16220>

2 Maddineni, P. *et al.* CNS axonal degeneration and transport deficits at the optic nerve head precede structural and functional loss of retinal ganglion cells in a mouse model of glaucoma. *Mol Neurodegener* **15**, 48 (2020). <https://doi.org/10.1186/s13024-020-00400-9>

**Supplementary Fig. 1 TM dissection and validation by histology.**

**a) Representative image of blunt dissection of the TM from anterior segment tissue.**

**b & c) H&E stained sections showing TM before (b) and after (c) dissection. TM is present prior to dissection and absent after removal, confirming clean isolation without contamination from adjacent structures. Scale bars, 100 μm.**

**Supplementary Fig. 2 Quality control metrics and cell-type composition across TM samples.**

**a-c) Violin plots showing distributions of detected genes per nucleus (nFeature_RNA, a), total UMI counts (nCount_RNA, b), and mitochondrial transcript percentage (percent.mt, c) across NTM and GTM samples.**

**d,e) Stacked bar plots showing cell-type proportions by condition (NTM vs GTM, d) and by individual sample (e).**

**f,g) UMAP projections of cells colored by cell type and separated by condition for NTM (f) and GTM (g), demonstrating consistent clustering and cell-type-specific transcriptomic identities.**

**Supplementary Fig. 3 UMAP visualization of TM cell populations across samples and marker gene expression.**

**a, b) UMAP projections of all cells colored by condition (NTM and GTM; a) and by individual sample (b), demonstrating consistent clustering across donors and absence of detectable batch effects.**

**c) Feature plots showing expression of representative marker genes across the UMAP embedding. Color intensity represents scaled gene expression levels.**

**Supplementary Fig. 4 Spatial localization of other TM-associated cell populations in human NTM tissue.**

**Visium spatial transcriptomics showing the spatial distribution of representative marker genes for additional cell populations, including scEndo (*SMAD1*), vEndo (*FLT1, VWF, SEC14L1*), melanocytes (*DCT, MLANA, TYRP1*), pericytes (*PDGFRB, TRPC4*), Schmy (*MPZ*), SchNmy (*SCN7A*), mast cells (*KIT, CPA3*), T/NK cells (*IL7R*), and macrophages (*CD163*). Color intensity represents log2-transformed summed expression levels. Scale bars, 1 mm.**

**Supplementary Fig. 5 Subclustering of TM populations reveals condition-associated shifts in cell distribution.**

**a) UMAP visualization of TM subclusters identified from the combined NTM and GTM dataset.**

**b, c) UMAP projections of TM subclusters separated by condition, NTM (b) and GTM (c), showing overall preservation of cluster structure with differences in subcluster representation.**

**d) Feature plots showing expression of representative marker genes used to define TM subpopulations. Color indicates scaled gene expression levels.**

**Supplementary Fig. 6 Expression of glaucoma-associated genes across TM-associated cell populations.**

**Dot plot showing the expression of established glaucoma-associated genes across all identified cell populations. Color indicates scaled expression level, and dot size represents the percentage of cells expressing each gene. Genes display cell-type-specific expression patterns across TM structural, endothelial, neural, and immune populations.**

**Supplementary Fig. 7 DEGs and pathway enrichment across other TM-associated cell populations in glaucoma.**

**Volcano plots representing differentially expressed genes (DEGs) and gene ontology (GO) enrichment analyses across cell populations comparing glaucoma versus normal conditions. Volcano plots for CM, (a, n = 517 DEGs), vEndo, (c, n = 114 DEGs), scEndo, (e, n = 1 DEGs), and pericytes (g, n = 0 DEGs) show genes plotted as log2 fold change versus -log10 P value. Upregulated genes are shown in orange, downregulated genes in blue, and non-significant genes in gray, with selected genes annotated. Corresponding GO enrichment analyses are shown for CM (b), vEndo (d), and scEndo (f), where lollipop plots display enriched pathways ranked by fold enrichment. Dot size represents -log10 (P value), and color indicates ontology category: BP (pink), CC (blue), and MF (green).**

**Supplementary Fig. 8 DEGs and pathway enrichment across Schwann-like cells and melanocyte populations in glaucoma.**

**Volcano plots representing DEGs and GO enrichment analyses across Schwann-like cells and melanocyte populations comparing glaucoma versus normal conditions. Volcano plots for SchNmy (a, n = 137 DEGs), Schmy (b, n = 9 DEGs), and melanocytes (c, n = 125 DEGs) show genes plotted as log2 fold change versus -log10 P value. Upregulated genes are shown in orange, downregulated genes in blue, and non-significant genes are shown in gray, with selected genes annotated. Corresponding GO enrichment analyses are shown for SchNmy (d), Schmy (e), and melanocytes (f), where lollipop plots display enriched pathways ranked by fold enrichment. Dot size represents -log10 (P value), and color indicates ontology category: BP (pink), CC (blue), and MF (green).**

**Supplementary Fig. 9 DEGs and pathway enrichment across immune cell populations in glaucoma.**

**Volcano plots representing DEGs and GO enrichment analyses across immune cell populations comparing glaucoma versus normal conditions. Volcano plots for macrophages (a, n = 133 DEGs), mast cells (b, n = 235 DEGs), and T/NK cells (c, n = 2 DEGs) show genes plotted as log2 fold change versus -log10 P value. Upregulated genes are shown in orange, downregulated genes in blue, and non-significant genes are shown in gray, with selected genes annotated. Corresponding GO enrichment analyses are shown for macrophages (d), mast cells (e), and T/NK cells (f), where lollipop plots display enriched pathways ranked by fold enrichment. Dot size represents -log10 (P value), and color indicates ontology category: BP (pink), CC (blue), and MF (green).**

**Supplementary Fig. 10 Cell-type-specific dysregulation of SLC transporter genes in glaucoma.**

**a) Differential expression analysis of SLC transporter genes across TM and associated cell populations comparing glaucoma versus normal conditions. MA (minus-average) plots display log₂ fold change (M) versus mean expression (A) for each TM population. Significantly expressed genes are highlighted in red, whereas non-significant genes are shown in gray. Key SLC transporter genes are annotated, demonstrating consistent dysregulation across multiple TM subtypes.**

**b) Heatmap showing enrichment of SLC family-associated transport pathways across TM and associated cell populations. Color intensity indicates enrichment significance and direction, with orange representing upregulation, purple representing downregulation, and white indicating no significant change. Ontology categories are indicated by color on the right: BP in deep red, CC in blue, and MF in green.**

**Supplementary Fig. 11 Cell-type-specific potassium channel dysregulation in glaucoma.**

**a) Differential expression analysis of potassium channel-related genes across TM and associated cell populations comparing glaucoma versus normal conditions. MA plots display log₂ fold change (M) versus mean expression (A) for each TM population. Significantly DEGs are highlighted in red, whereas non-significant genes are shown in gray. Key potassium channel genes are annotated, demonstrating consistent dysregulation across multiple TM subtypes.**

**b) Heatmap showing enrichment of potassium ion transport-related pathways across TM and associated cell populations. Color intensity indicates enrichment significance and direction, with orange representing upregulation, purple representing downregulation, and white indicating no significant change. Ontology categories are indicated by color on the right: BP in deep red, CC in blue, and MF in green.**

**Supplementary Fig. 12 *STX1B* expression across TM cell populations.**

**Boxplots showing mean *STX1B* expression per sample across TM and associated cell populations in NTM and GTM conditions. Each dot represents an individual sample. Boxes indicate the interquartile range (IQR) with median values, and whiskers represent the range. Statistical significance between NTM and GTM was assessed for each cell type, with corresponding p-values indicated. Significant differential expressions were observed in TM-Fib cells (p = 0.016), while other cell populations showed no statistically significant differences.**

**Supplementary Fig. 13 Cell cycle distribution across TM populations.**
a) UMAP visualization of TM cells colored by cell cycle phase (G1, S, G2/M).
b-c) UMAP plots showing G2/M (b) and S (c) phase scores across TM populations.
d) Proportion of cells in each cell cycle phase across TM subtypes.
e) Comparison of cell cycle phase proportions across TM populations.
f) Statistical comparison of cell cycle phase distribution between NTM and GTM across TM subtypes.

**Supplementary Fig. 14 Differential enrichment of shear stress, wound healing, and outflow tract morphogenesis pathways across TM cell populations.**

a-d) Lollipop plots show enrichment of shear stress-related pathways in TM-JCT (a) and TM-Fib (b) cells, downregulated wound healing pathway enrichment in TM-BeamA cells (c), and outflow tract morphogenesis pathway enrichment in mast cells (d).

e-g) Heatmap of shear stress-associated genes KLF2, PTGS2 (e), wound healing-associated genes FERMT1, TMEFF2 (f), and outflow tract morphogenesis-associated genes (DHRS3, FGFR2, TGFB2 (g) across TM subpopulations. Color scale represents log2 fold change.

**Tables title and legends**

**Supplementary Table 1.** **Donor demographic details.**

Summary of donor characteristics, including age, sex, clinical status, and sample identifiers used in this study.

**Supplementary Table 2. Cell counts across samples and cell populations.**

Number of cells per sample and per annotated cell population included in the integrated dataset.

**Supplementary Table 3. Quality control metrics summary.**

Summary of quality control metrics, including detected genes per nucleus (nFeature_RNA), total UMI counts (nCount_RNA), and mitochondrial transcript percentages (percent.mt) across samples.

**Supplementary Table 4. Marker genes used for cell-type annotation and corresponding references.**

List of marker genes used to define cell populations, with supporting literature references.

**Supplementary Table 5. Differential gene expression results.**

List of significantly DEGs identified across cell populations, including log2 fold change, adjusted P values, and associated statistics.

**Supplementary Table 6. GO enrichment results.**

Results of GO enrichment analysis for differentially expressed genes across cell populations, including enriched pathways, fold enrichment, and statistical significance.

**Supplementary Table 7. List of antibodies used in this study.**

Details of primary and secondary antibodies used, catalog number, RRID and working dilutions.

**Supplementary Table 8. Gene full names and abbreviations.**

List of gene full names, corresponding gene symbols and abbreviations used in this study.
