# Supplementary material for: Transcriptomic Atlas of Human Trabecular Meshwork Uncovers the Cellular Landscape and Provides Insights into Glaucoma Pathophysiology
Source: Research Square preprint supplement (doi:10.21203/rs.3.rs-9540265/v1), 2026-06-22
Supplement: Supplementary file 3 [file 33c8cfc323f7663a45e91d00.xlsx]

## Sheet: Sheet1
S. NO​	Sample ID​	Age​	Gender​	Ancestry	Batch​	Condition​	Ocular Pathology Record	Eye drops medication	Other Pathology Record	Cause of death (COD)
1​	NTM1​	79​	Male​	European descent	1​	Normal​	No ocular pathology	None	Cardiovascular, neurological, and metabolic comorbidities including heart failure, coronary artery disease, Parkinson’s disease, obesity, and GERD	Not available
2	NTM3​	67​	Male​	European descent	1​	Normal​	No ocular pathology	None	Leukemia and pneumonia; history of dialysis and cardiac procedures	End stage renal disease
3	NTM4​	63​	Female​	European descent	1​	Normal​	No ocular pathology	None	Cardiovascular and metabolic conditions including hypertension and hypercholesterolemia; sepsis and liver cancer	Not available
4	NTM5​	77​	Male​	European descent	2​	Normal​	No ocular pathology	None	Metastatic lung cancer and cardiovascular disease including myocardial infarction	Cancer
5	NTM6​	88​	Male​	European descent	2​	Normal​	No ocular pathology	None	Not available	Not available
6	NTM7​	67​	Female​	European descent	2​	Normal​	No ocular pathology	None	Idiopathic pulmonary fibrosis	Not available
7	NTM8​	85​	Female​	European descent	2​	Normal​	No ocular pathology	None	Nephrectomy and history of breast cancer	Not available
8	GTM1​	79​	Male​	European descent	1​	Glaucoma​	Glaucoma; cataract surgery; retinal detachment	Eye drops (unspecified)	Prostate cancer, splenectomy, hypertension, hyperlipidemia, renal disease	Not available
9	GTM2​	74​	Female​	European descent	1​	Glaucoma​	Glaucoma; cataract	Bimatoprost eye drops	Cardiovascular, pulmonary, metabolic, and gastrointestinal comorbidities including atrial fibrillation, heart failure, COPD, diabetes, and GERD	Cardiac disease
10	GTM3​	80​	Male​	European descent	1​	Glaucoma​	Primary open-angle glaucoma (POAG)	Travoprost eye drops	Prostate cancer with metastasis; cardiovascular and pulmonary comorbidities	Cancer
11	GTM4​	82​	Male​	European descent	1​	Glaucoma​	Glaucoma	Dorzolamide-timolol (Cosopt) and latanoprost (Xalatan) eye drops	Metastatic lung cancer; cardiovascular and metabolic comorbidities	Metastatic squamous cell lung cancer
12	GTM5​	80​	Male​	European descent	2​	Glaucoma​	Primary open-angle glaucoma (POAG)	Latanoprost eye drops	Sepsis; cardiovascular and metabolic comorbidities including hypertension, diabetes, and peripheral vascular disease	Sepsis
13	GTM6​	95​	Female​	European descent	2​	Glaucoma​	Glaucoma (both eyes); cataract implants	Eye drops (unspecified)	Not available	Not available
14	GTM7​	72​	Male​	European descent	2​	Glaucoma​	Primary open-angle glaucoma (POAG)	Latanoprost eye drops	Pancreatic cancer; cardiovascular and metabolic comorbidities	Active Pancreatic cancer
