# Supplementary material for: Transcriptomic Atlas of Human Trabecular Meshwork Uncovers the Cellular Landscape and Provides Insights into Glaucoma Pathophysiology
Source: Research Square preprint supplement (doi:10.21203/rs.3.rs-9540265/v1), 2026-06-22
Supplement: Supplementary file 4 [file 4dd66f8039554f47d9288738.xlsx]

## Sheet: Sheet 1
celltype	GTM1	GTM2	GTM3	GTM4	GTM5	GTM6	GTM7	NTM1	NTM3	NTM4	NTM5	NTM6	NTM7	NTM8	Total
TM-BeamA	4253	2242	2733	3729	1450	4349	4035	433	2252	3369	936	2993	3612	1971	38357
TM-BeamB	1316	599	848	1553	308	514	1060	547	937	619	758	1300	1059	827	12245
TM-CS	51	90	118	396	38	54	34	71	176	133	104	189	84	32	1570
TM-JCT	417	931	1647	3484	502	390	1130	1181	1366	909	1689	1917	1956	794	18313
TM-Fib	408	1757	1686	968	601	389	976	368	946	1234	791	2025	1157	1140	14446
TM-Myo	1738	2533	3049	3987	891	2196	3919	349	1697	3657	1695	2547	3270	1025	32553
TM-Uveal	399	784	765	1062	384	259	742	95	315	915	385	296	741	114	7256
CM	6514	4974	5835	6801	3011	3686	10777	1571	4071	5421	1564	7575	7754	5555	75109
Pericyte	210	55	99	216	112	157	296	28	88	219	64	168	251	188	2151
Melanocyte	2054	1174	1479	1408	305	1506	1919	171	672	1579	278	881	1409	995	15830
Schmy	303	216	299	382	134	98	505	25	241	276	163	627	445	435	4149
SchNmy	6229	2265	4179	2534	3061	2550	4996	509	2457	2528	1226	3386	3644	5473	45037
scEndo	168	48	85	402	41	86	195	99	172	228	66	106	117	145	1958
vEndo	219	108	198	401	238	280	632	47	66	150	35	341	426	159	3300
Mast cell	66	29	231	126	23	130	29	13	22	13	14	75	64	61	896
Macrophage	818	279	570	1473	731	1144	790	127	268	480	614	1177	1143	701	10315
T/NK cell	144	36	57	201	314	221	130	39	77	64	174	144	110	160	1871
Total	25307	18120	23878	29123	12144	18009	32165	5673	15823	21794	10556	25747	27242	19775	285356
