# Supplementary material for: Transcriptomic Atlas of Human Trabecular Meshwork Uncovers the Cellular Landscape and Provides Insights into Glaucoma Pathophysiology
Source: Research Square preprint supplement (doi:10.21203/rs.3.rs-9540265/v1), 2026-06-22
Supplement: Supplementary file 5 [file 6812396ccb64dbad8477143f.xlsx]

## Sheet: List of genes with full names
S.No	Gene Name	Full gene name
1	A2M	Alpha-2-macroglobulin
2	ADAM12	A Disintegrin and Metalloproteinase Domain 12
3	ADAMTS1	A Disintegrin and Metalloproteinase with Thrombospondin Motifs 1
4	ADAMTS4	A Disintegrin and Metalloproteinase with Thrombospondin Motifs 4
5	ADAMTS8	A Disintegrin and Metalloproteinase with Thrombospondin Motifs 8
6	ADH1B	Alcohol Dehydrogenase 1B (Class I), Beta Polypeptide
7	ADH4	Alcohol Dehydrogenase 4 (Class II), Pi Polypeptide
8	ADRA1A	Adrenergic receptor gene adrenoceptor alpha 1A
9	AGT	Angiotensinogen
10	AKAP12	A-Kinase Anchoring Protein 12
11	APOC1	Apolipoprotein C1
12	AQP5	Aquaporin 5
13	ARID5A	AT-Rich Interaction Domain 5A
14	ARMH1	Armadillo Like Helical Domain Containing 1
15	ASPG	Asparaginase
16	BCL3	B-Cell Lymphoma 3 Transcription Coactivator
17	BOLA1	BolA-like protein 1
18	BRINP2	Bone Morphogenic Protein/Retinoic Acid Inducible Neural Specific 2
19	BTG1	B-Cell Translocation Gene 1 Anti-Proliferation Factor 1
20	C2CD4A	C2 Calcium Dependent Domain Containing 4A
21	C2CD6	C2 calcium dependent domain containing 6
22	CACNA1G	Calcium Voltage-Gated Channel Subunit Alpha1 G
23	CACNG8	Calcium voltage-gated channel auxiliary subunit gamma 8
24	CATSPERE	Cation channel sperm-associated auxiliary subunit epsilon
25	CCDC141	Coiled-Coil Domain Containing 141
26	CCL2	C-C Motif Chemokine Ligand 2
27	CCR7	C-C Motif Chemokine Receptor 7
28	CDH23	Cadherin-related 23
29	CDH5	Cadherin 5
30	CDKN2B	Cyclin Dependent Kinase Inhibitor 2B
31	CEMIP	Cell migration inducing hyaluronidase 1
32	CHI3L1	Chitinase 3 Like 1
33	CISH	Cytokine Inducible SH2 Containing Protein
34	COX6B2	Cytochrome C Oxidase Subunit 6B2
35	CPAMD8	C3 and PZP Like Alpha-2-Macroglobulin Domain Containing 8
36	CPNE4	Copine 4
37	CRAT37	Cervical Cancer-Associated Transcript 37
38	CRAT37	Cervical Cancer-Associated Transcript 37
39	CSF3	Colony Stimulating Factor 3
40	CSMD3	CUB and Sushi Multiple Domains 3
41	CYS1	Cystin 1
42	CYTL1	Cytokine Like 1
43	DGCR5	DiGeorge Syndrome Critical Region Gene 5
44	DNAH9	Dynein Axonemal Heavy Chain 9
45	DNM2	Dynamin 2
46	DOC2B	Double C2 domain beta
47	DYRK3-AS1	Dual Specificity Tyrosine Phosphorylation Regulated Kinase 3 Antisense RNA 1
48	ELANE	Elastase-Neutrophil Expressed
49	ERFE	Erythroferrone
50	EVI2A	Ecotropic Viral Integration Site 2A
51	FJX1	Four-Jointed Box Kinase 1
52	FJX1	Four-Jointed Box Kinase 1
53	FPR1	Formyl peptide receptor 1
54	FST	Follistatin
55	FSTL4	Follistatin Like 4
56	GP1BB	Glycoprotein Ib platelet subunit beta
57	GRIA3	Glutamate ionotropic receptor AMPA type subunit 3
58	GSG1L	Germ Cell-Specific Gene 1-Like
59	H2BC8	H2B Clustered Histone 8
60	HGF	Hepatocyte growth factor
61	HP	Haptoglobin
62	HSPA1A	Heat Shock Protein Family A (Hsp70) Member 1A
63	HSPA1B	Heat Shock Protein Family A (Hsp70) Member 1B
64	HSPA1B	Heat Shock Protein Family A (Hsp70) Member 1B
65	HTR2A	5-hydroxytryptamine receptor 2A
66	HTR4	5-Hydroxytryptamine Receptor 4
67	IER5	Immediate Early Response 5
68	IFNG-AS1	Interferon Gamma Regulatory Antisense RNA 1
69	IL-1	Interleukin-1
70	IL-1α	Interleukin-1 alpha
71	IL-1β	Interleukin-1 beta
72	IL-5	Interleukin-5
73	IL-8	Interleukin-8
74	IL-12	Interleukin-12
75	IL-15	Interleukin-15
76	IL-17	Interleukin-17
77	IL-18	Interleukin-18
78	IL1R1	Interleukin 1 Receptor Type 1
79	IL1R2	Interleukin 1 Receptor Type 2
80	IL1RL1	Interleukin 1 Receptor Like 1
81	IL15RA	Interleukin 15 Receptor Subunit Alpha
82	IL18R1	Interleukin 18 Receptor 1
83	INHBA	Inhibin Subunit Beta A
84	IRAK1	Interleukin 1 Receptor Associated Kinase 1
85	KANSL1-AS1	KAT8 Regulatory NSL Complex Subunit 1 Antisense RNA 1
86	KCNH1	Potassium voltage-gated channel subfamily H member 1
87	KCNIP1	Potassium Voltage-Gated Channel Interacting Protein 1
88	KCNJ12	Potassium Inwardly Rectifying Channel Subfamily J Member 12
89	KCNJ3	Potassium Inwardly Rectifying Channel Subfamily J Member 3
90	KCNS3	Potassium voltage-gated channel modifier subfamily S member 3
91	KLF2	Kruppel-Like Factor 2
92	KLHDC8A	Kelch Domain Containing 8A
93	LAMA1	Laminin Subunit Alpha 1
94	LAMB1	Laminin Subunit Beta 1
95	LYPD1	LY6/PLAUR Domain Containing 1
96	LYPD6B	LY6/PLAUR Domain Containing 6B
97	MAFA-AS1	MAF BZIP Transcription Factor A Antisense RNA 1
98	MAGEC3	MAGE Family Member C3
99	MAP2K6	Mitogen-Activated Protein Kinase Kinase 6
100	MEDAG	Mesenteric Estrogen Dependent Adipogenesis
101	MGAT4C	Mannosyl (Alpha-1,3-)-Glycoprotein Beta-1,4-N-Acetylglucosaminyltransferase, Family Member C
102	MGAT4C	MGAT4 Family Member C
103	MPP7-DT	MPP7 Divergent Transcript
104	MT1A	Metallothionein 1A
105	MT1M	Metallothionein 1M
106	MT1X	Metallothionein 1X
107	MT2A	Metallothionein 2A
108	NGF	Nerve Growth Factor
109	NMUR2	Neuromedin U Receptor 2
110	NXPH2	Neurexophilin 2
111	P2RX6	Purinergic receptor P2X 6
112	P2RX7	Purinergic receptor P2X 7
113	P2RX7	Purinergic receptor P2X 7
114	P2RY12	Purinergic Receptor P2Y G-Protein Coupled 12
115	PALM3	Paralemmin 3
116	PCK1	Phosphoenolpyruvate Carboxykinase 1
117	PDE6B	Phosphodiesterase 6B
118	PI15	Peptidase Inhibitor 15
119	PKD1L2	Polycystin 1 Like 2
120	PKD2L	Polycystic kidney disease 2-like 1
121	PKD2L1	Polycystin 2 Like 1
122	PLA2G2A	Phospholipase A2 Group IIA
123	PNP	Purine Nucleoside Phosphorylase
124	PTGER3	Prostaglandin E Receptor 3
125	PTGER4	Prostaglandin E receptor 4
126	PTGS2	prostaglandin-endoperoxide synthase 2
127	PTPRR	Protein Tyrosine Phosphatase Receptor Type R
128	RARRES1	Retinoic Acid Receptor Responder 1
129	RDH10 - AS1	RDH10 Antisense RNA 1
130	RFTN1	Raftlin, Lipid Raft Linker 1
131	RMST	Rhabdomyosarcoma 2 Associated Transcript
132	S1PR3	Sphingosine-1-Phosphate Receptor 3
133	SAT1	Spermidine/Spermine N1-Acetyltransferase 1
134	SCG2	Secretogranin II
135	SCMH1-DT	SCM Polycomb Group Protein Homolog 1 - Divergent Transcript
136	SERPINA3	Serpin Family A Member 3
137	SH3TC2-DT	SH3TC2 Divergent Transcript
138	SIRPA	Signal Regulatory Protein Alpha
139	SLC11A1	Solute Carrier Family 11 Member 1
140	SLC17A1	Solute Carrier Family 17 Member 1
141	SLC1A1	Solute Carrier Family 1 Member 1
142	SLC30A10	Solute carrier family 30 member 10
143	SLC4A11	Solute Carrier Family 4 Member 11
144	SLC4A8	Solute Carrier Family 4 Member 8
145	SLC6A1	Solute Carrier Family 6 Member 1
146	SLC6A11	Solute Carrier Family 6 Member 11
147	SLC6A20	Solute Carrier Family 6 Member 20
148	SLC6A6	Solute Carrier Family 6 Member 6
149	SLC7A14 - AS1	Solute Carrier Family 7 Member 14 - Antisense RNA 1
150	SOCS3	Suppressor of cytokine signaling 3
151	SOD2	Superoxide dismutase 2
152	SORCS3	Sortilin Related VPS10 Domain Containing Receptor 3
153	SORL1	Sortilin-related receptor 1
154	SPP1	Secreted Phosphoprotein 1
155	ST6GAL2	ST6 Beta-Galactoside Alpha-2,6-Sialyltransferase 2
156	STAC2	SH3 and Cysteine Rich Domain 2
157	STC1	Stanniocalcin 1
158	STEAP2	STEAP2 Metalloreductase
159	STX1B	Syntaxin 1B
160	TAC1	Tachykinin Precursor 1
161	TAC1	Tachykinin Precursor 1
162	TAFA4	TAFA Chemokine Like Family Member 4
163	TBX15	T-Box Transcription Factor 15
164	TEX26-AS1	Testis Expressed 26 Antisense RNA 1
165	TMEFF2	Transmembrane Protein with EGF Like and Two Follistatin Like Domains 2
166	TMEM123-DT	Transmembrane Protein 123 Divergent Transcript
167	TMEM37	Transmembrane Protein 37
168	TNFAIP6	TNF alpha-induced protein 6
169	TNFSF4	Tumor Necrosis Factor Superfamily Member 4
170	TRIB1	Tribbles Pseudokinase 1
171	TRPM3	Transient receptor potential cation channel subfamily M member 3
172	TRPV1	Transient receptor potential cation channel subfamily V member 1
173	TTN	Titin
174	WIF1	Wnt Inhibitory Factor 1
175	ZFP36	Zinc finger protein 36
176	ZNF295-AS1	ZNF295 Antisense RNA 1
177	ZNF878	Zinc Finger Protein 878
178	ZNF98	Zinc Finger Protein 98
179	ZP3	Zona Pellucida Glycoprotein 3

## Sheet: List of abbreviations 
S. No	Abbreviation	Full Form
1	AH	Aqueous humor
2	CM	Ciliary muscle
3	CS	Corneoscleral
4	DE	Differential expression
5	DEGs	Differentially expressed genes
6	ECM	Extracellular matrix
7	ER	Endoplasmic reticulum
8	GO	Gene ontology
9	GTM	Glaucomatous trabecular meshwork
10	H&E	Hematoxylin and Eosin
11	IOP	Intraocular pressure
12	JCT	Juxtacanalicular tissue
13	MAPK	Mitogen-activated protein kinase
14	NTM	Normal trabecular meshwork
15	POAG	Primary open-angle glaucoma
16	RGC	Retinal ganglion cell
17	ROS	Reactive oxygen species
18	SC	Schlemm’s canal
19	scEndo	Schlemm’s canal endothelial cells
20	Schmy	Myelinating Schwann cells
21	SchNmy	Non-myelinating Schwann cells
22	scRNA-seq	Single-cell RNA sequencing
23	snRNA-seq	Single-nucleus RNA sequencing
24	T/NK cells	T cells and natural killer cells
25	TM	Trabecular meshwork
26	TM-BeamA	Trabecular meshwork beam A
27	TM-BeamB	Trabecular meshwork beam B
28	TM-CS	Trabecular meshwork corneoscleral meshwork
29	TM-Fib	Trabecular meshwork fibroblast-like cells
30	TM-JCT	Trabecular meshwork juxtacanalicular tissue
31	TM-Myo	Trabecular meshwork myofibroblast-like cells
32	TM-Uveal	Trabecular meshwork uveal meshwork
33	UMAP	Uniform Manifold Approximation and Projection
34	UMI	Unique molecular identifier
35	vEndo	Vascular endothelial cells
