# Supplementary material for: Transcriptomic Atlas of Human Trabecular Meshwork Uncovers the Cellular Landscape and Provides Insights into Glaucoma Pathophysiology
Source: Research Square preprint supplement (doi:10.21203/rs.3.rs-9540265/v1), 2026-06-22
Supplement: Supplementary file 7 [file a0c7d4e80b161c72d007704e.xlsx]

## Sheet: in
ID	Description	GeneRatio	BgRatio	RichFactor	FoldEnrichment	zScore	pvalue	p.adjust	qvalue	geneID	Count	Ontology	reg	celltype
GO:0035966	response to topologically incorrect protein	14/149	160/18986	0.0875	11.1495	11.4662	3.12552e-11	8.96087e-08	7.54403e-08	CTH/DNAJB4/HSPA6/ATF3/HSPE1/HSPA1A/HSPB1/HSPA5/BAG3/HSPB8/HSPH1/PPP1R15A/XBP1/KLHL15	14	BP	upreg	CM
GO:0006986	response to unfolded protein	13/149	143/18986	0.0909091	11.5839	11.2988	1.00737e-10	1.44407e-07	1.21574e-07	CTH/DNAJB4/HSPA6/ATF3/HSPE1/HSPA1A/HSPB1/HSPA5/BAG3/HSPB8/HSPH1/PPP1R15A/XBP1	13	BP	upreg	CM
GO:0051085	chaperone cofactor-dependent protein refolding	7/149	32/18986	0.21875	27.8737	13.5315	4.54426e-09	4.3428e-06	3.65614e-06	DNAJB4/HSPA6/HSPE1/HSPA1A/HSPA1B/HSPA5/HSPH1	7	BP	upreg	CM
GO:0030099	myeloid cell differentiation	18/149	451/18986	0.0399113	5.08561	7.80983	1.66596e-08	1.19408e-05	1.00528e-05	ID2/EPAS1/IL1RL1/TNFAIP6/ERFE/PPARG/H4C1/TNF/HSPA1A/HSPA1B/INHBA/TRIB1/MYC/FOS/CSF3/CCR7/JUNB/KLF2	18	BP	upreg	CM
GO:0051084	'de novo' post-translational protein folding	7/149	44/18986	0.159091	20.2718	11.3823	4.78224e-08	2.23456e-05	1.88124e-05	DNAJB4/HSPA6/HSPE1/HSPA1A/HSPA1B/HSPA5/HSPH1	7	BP	upreg	CM
GO:1903706	regulation of hemopoiesis	17/149	433/18986	0.039261	5.00274	7.49354	5.43266e-08	2.23456e-05	1.88124e-05	ID2/TNFAIP6/ERFE/H4C1/TNF/HSPA1A/HSPA1B/PRDM1/INHBA/TRIB1/MYC/IL15RA/PNP/FOS/CSF3/JUNB/XBP1	17	BP	upreg	CM
GO:0042026	protein refolding	6/149	27/18986	0.222222	28.3162	12.6324	5.45585e-08	2.23456e-05	1.88124e-05	HSPA6/HSPA1A/HSPA1B/HSPB1/HSPA5/CRYAB	6	BP	upreg	CM
GO:0002573	myeloid leukocyte differentiation	13/149	247/18986	0.0526316	6.70646	8.02851	7.78383e-08	2.78953e-05	2.34846e-05	ID2/IL1RL1/TNFAIP6/ERFE/PPARG/TNF/INHBA/TRIB1/MYC/FOS/CSF3/CCR7/JUNB	13	BP	upreg	CM
GO:0006458	'de novo' protein folding	7/149	49/18986	0.142857	18.2033	10.7237	1.03745e-07	3.30485e-05	2.78231e-05	DNAJB4/HSPA6/HSPE1/HSPA1A/HSPA1B/HSPA5/HSPH1	7	BP	upreg	CM
GO:0061077	chaperone-mediated protein folding	8/149	76/18986	0.105263	13.4129	9.64335	1.43108e-07	4.10289e-05	3.45417e-05	DNAJB4/HSPA6/HSPE1/HSPA1A/HSPA1B/HSPB1/HSPA5/HSPH1	8	BP	upreg	CM
GO:0045637	regulation of myeloid cell differentiation	12/149	219/18986	0.0547945	6.98207	7.91897	1.62636e-07	4.23889e-05	3.56866e-05	ID2/TNFAIP6/ERFE/H4C1/TNF/HSPA1A/HSPA1B/INHBA/TRIB1/MYC/FOS/CSF3	12	BP	upreg	CM
GO:1902895	positive regulation of miRNA transcription	7/149	56/18986	0.125	15.9279	9.94967	2.67542e-07	5.92498e-05	4.98815e-05	JUN/PPARG/TNF/MYC/KLF4/FOSL1/FOS	7	BP	upreg	CM
GO:0035967	cellular response to topologically incorrect protein	9/149	114/18986	0.0789474	10.0597	8.62879	2.85025e-07	5.92498e-05	4.98815e-05	CTH/ATF3/HSPA1A/HSPA5/BAG3/HSPB8/PPP1R15A/XBP1/KLHL15	9	BP	upreg	CM
GO:0006457	protein folding	12/149	231/18986	0.0519481	6.61937	7.64236	2.89326e-07	5.92498e-05	4.98815e-05	DNAJB4/HSPA6/HSPE1/DNAJB11/HSPA1A/HSPA1B/BAG2/HSPB1/HSPA5/BAG3/CRYAB/HSPH1	12	BP	upreg	CM
GO:0033002	muscle cell proliferation	12/149	252/18986	0.047619	6.06775	7.20266	7.31957e-07	0.000139901	0.000117781	JUN/ID2/PPARG/TNF/PIM1/HGF/TRIB1/KLF4/FOS/ELANE/ADAMTS1/XBP1	12	BP	upreg	CM
GO:2000630	positive regulation of miRNA metabolic process	7/149	67/18986	0.104478	13.3128	8.97922	9.3353e-07	0.000167277	0.000140828	JUN/PPARG/TNF/MYC/KLF4/FOSL1/FOS	7	BP	upreg	CM
GO:0034620	cellular response to unfolded protein	8/149	99/18986	0.0808081	10.2968	8.24825	1.11621e-06	0.000188245	0.000158481	CTH/ATF3/HSPA1A/HSPA5/BAG3/HSPB8/PPP1R15A/XBP1	8	BP	upreg	CM
GO:0009408	response to heat	8/149	106/18986	0.0754717	9.61682	7.91209	1.87748e-06	0.000288972	0.000243281	DNAJB4/HSPA6/IER5/HSPA1A/HSPA1B/HSPB1/BAG3/CRYAB	8	BP	upreg	CM
GO:0140467	integrated stress response signaling	6/149	48/18986	0.125	15.9279	9.20966	1.97486e-06	0.000288972	0.000243281	JUN/HSPA5/FOSL1/FOS/JUNB/PPP1R15A	6	BP	upreg	CM
GO:0045639	positive regulation of myeloid cell differentiation	8/149	107/18986	0.0747664	9.52694	7.86662	2.01585e-06	0.000288972	0.000243281	ID2/TNF/HSPA1A/HSPA1B/INHBA/TRIB1/FOS/CSF3	8	BP	upreg	CM
GO:1902893	regulation of miRNA transcription	7/149	76/18986	0.0921053	11.7363	8.34082	2.2126e-06	0.000298505	0.000251307	JUN/PPARG/TNF/MYC/KLF4/FOSL1/FOS	7	BP	upreg	CM
GO:0010721	negative regulation of cell development	12/149	281/18986	0.0427046	5.44154	6.67115	2.29058e-06	0.000298505	0.000251307	BTG2/ID2/TNFAIP6/ERFE/DNAJB11/SPP1/TNF/INHBA/IFRD1/TRIB1/MYC/S1PR3	12	BP	upreg	CM
GO:0061614	miRNA transcription	7/149	77/18986	0.0909091	11.5839	8.27654	2.41799e-06	0.000301408	0.000253751	JUN/PPARG/TNF/MYC/KLF4/FOSL1/FOS	7	BP	upreg	CM
GO:1902105	regulation of leukocyte differentiation	13/149	337/18986	0.0385757	4.91542	6.44998	2.63819e-06	0.000315154	0.000265323	ID2/TNFAIP6/ERFE/TNF/PRDM1/INHBA/TRIB1/MYC/IL15RA/PNP/FOS/JUNB/XBP1	13	BP	upreg	CM
GO:0010273	detoxification of copper ion	4/149	16/18986	0.25	31.8557	10.9813	6.16148e-06	0.000679421	0.000571995	MT2A/MT1M/MT1A/MT1X	4	BP	upreg	CM
GO:1990169	stress response to copper ion	4/149	16/18986	0.25	31.8557	10.9813	6.16148e-06	0.000679421	0.000571995	MT2A/MT1M/MT1A/MT1X	4	BP	upreg	CM
GO:2000628	regulation of miRNA metabolic process	7/149	92/18986	0.076087	9.69521	7.43541	7.98596e-06	0.000847991	0.000713911	JUN/PPARG/TNF/MYC/KLF4/FOSL1/FOS	7	BP	upreg	CM
GO:0002761	regulation of myeloid leukocyte differentiation	8/149	130/18986	0.0615385	7.8414	6.96121	8.63098e-06	0.000883751	0.000744016	ID2/TNFAIP6/ERFE/TNF/INHBA/TRIB1/MYC/FOS	8	BP	upreg	CM
GO:0048660	regulation of smooth muscle cell proliferation	9/149	174/18986	0.0517241	6.59084	6.5891	9.63876e-06	0.000946867	0.000797153	JUN/ID2/PPARG/TNF/TRIB1/KLF4/ELANE/ADAMTS1/XBP1	9	BP	upreg	CM
GO:0006882	intracellular zinc ion homeostasis	5/149	37/18986	0.135135	17.2193	8.78279	9.90792e-06	0.000946867	0.000797153	SLC1A1/MT2A/MT1M/MT1A/MT1X	5	BP	upreg	CM
GO:0009266	response to temperature stimulus	9/149	176/18986	0.0511364	6.51594	6.53844	1.05679e-05	0.000977356	0.000822821	DNAJB4/HSPA6/IER5/HSPA1A/HSPA1B/HSPB1/TAC1/BAG3/CRYAB	9	BP	upreg	CM
GO:1901654	response to ketone	10/149	224/18986	0.0446429	5.68852	6.27787	1.11836e-05	0.00100198	0.000843549	ERRFI1/BTG2/SPP1/PTGER4/INHBA/KLF4/FOSL1/FOS/CCR7/KLF2	10	BP	upreg	CM
GO:0048659	smooth muscle cell proliferation	9/149	178/18986	0.0505618	6.44273	6.48855	1.15724e-05	0.00100451	0.000845679	JUN/ID2/PPARG/TNF/TRIB1/KLF4/ELANE/ADAMTS1/XBP1	9	BP	upreg	CM
GO:0097192	extrinsic apoptotic signaling pathway in absence of ligand	6/149	65/18986	0.0923077	11.7621	7.72991	1.19125e-05	0.00100451	0.000845679	TNF/HSPA1A/HSPA1B/INHBA/KLF4/BAG3	6	BP	upreg	CM
GO:0038034	signal transduction in absence of ligand	6/149	67/18986	0.0895522	11.411	7.5923	1.42084e-05	0.00116387	0.000979848	TNF/HSPA1A/HSPA1B/INHBA/KLF4/BAG3	6	BP	upreg	CM
GO:0045926	negative regulation of growth	10/149	232/18986	0.0431034	5.49236	6.123	1.51683e-05	0.00120799	0.00101699	SPP1/HSPA1A/HSPA1B/INHBA/IFRD1/CRYAB/MT2A/MT1M/MT1A/MT1X	10	BP	upreg	CM
GO:2001233	regulation of apoptotic signaling pathway	13/149	403/18986	0.0322581	4.11041	5.61313	1.80277e-05	0.00139691	0.00117603	CTH/ATF3/PPARG/TNF/HSPA1A/HSPA1B/INHBA/HSPB1/HGF/MYC/KLF4/ITPRIP/XBP1	13	BP	upreg	CM
GO:0097501	stress response to metal ion	4/149	21/18986	0.190476	24.271	9.48945	1.9652e-05	0.00148269	0.00124826	MT2A/MT1M/MT1A/MT1X	4	BP	upreg	CM
GO:0006935	chemotaxis	14/149	472/18986	0.029661	3.77949	5.43849	2.16388e-05	0.00159073	0.00133921	CCN1/F3/TNFAIP6/DUSP1/TREM1/HSPB1/HGF/COLEC10/CH25H/FOSL1/CCR7/ELANE/FLRT3/ITGB2	14	BP	upreg	CM
GO:0042330	taxis	14/149	474/18986	0.0295359	3.76354	5.41903	2.26716e-05	0.00162498	0.00136805	CCN1/F3/TNFAIP6/DUSP1/TREM1/HSPB1/HGF/COLEC10/CH25H/FOSL1/CCR7/ELANE/FLRT3/ITGB2	14	BP	upreg	CM
GO:0002526	acute inflammatory response	7/149	110/18986	0.0636364	8.10872	6.65006	2.5792e-05	0.00176043	0.00148208	F3/FCGR2A/TNF/SERPINA3/C2CD4A/CCR7/ELANE	7	BP	upreg	CM
GO:0010586	miRNA metabolic process	7/149	110/18986	0.0636364	8.10872	6.65006	2.5792e-05	0.00176043	0.00148208	JUN/PPARG/TNF/MYC/KLF4/FOSL1/FOS	7	BP	upreg	CM
GO:2001239	regulation of extrinsic apoptotic signaling pathway in absence of ligand	5/149	45/18986	0.111111	14.1581	7.85942	2.64034e-05	0.00176043	0.00148208	TNF/HSPA1A/HSPA1B/INHBA/KLF4	5	BP	upreg	CM
GO:0061687	detoxification of inorganic compound	4/149	23/18986	0.173913	22.1605	9.03085	2.87228e-05	0.00187155	0.00157563	MT2A/MT1M/MT1A/MT1X	4	BP	upreg	CM
GO:0071294	cellular response to zinc ion	4/149	24/18986	0.166667	21.2371	8.82277	3.42576e-05	0.00218259	0.00183749	MT2A/MT1M/MT1A/MT1X	4	BP	upreg	CM
GO:0071280	cellular response to copper ion	4/149	25/18986	0.16	20.3877	8.62695	4.05348e-05	0.00252637	0.00212692	MT2A/MT1M/MT1A/MT1X	4	BP	upreg	CM
GO:0001649	osteoblast differentiation	10/149	262/18986	0.0381679	4.86347	5.60043	4.28792e-05	0.00261563	0.00220206	CCN1/TNFAIP6/HSPE1/ERFE/PPARG/SPP1/TNF/HGF/JUNB/JUND	10	BP	upreg	CM
GO:2001236	regulation of extrinsic apoptotic signaling pathway	8/149	164/18986	0.0487805	6.21575	5.9662	4.63557e-05	0.00276878	0.002331	ATF3/TNF/HSPA1A/HSPA1B/INHBA/HGF/KLF4/ITPRIP	8	BP	upreg	CM
GO:0071276	cellular response to cadmium ion	4/149	27/18986	0.148148	18.8775	8.26747	5.55539e-05	0.00325047	0.00273652	MT2A/MT1M/MT1A/MT1X	4	BP	upreg	CM
GO:0097305	response to alcohol	10/149	275/18986	0.0363636	4.63356	5.39812	6.43595e-05	0.00362391	0.00305091	BTG2/PTGER4/TNF/INHBA/KLF4/FOSL1/FOS/CSF3/CCR7/KLF2	10	BP	upreg	CM
GO:0001503	ossification	13/149	456/18986	0.0285088	3.63267	5.06097	6.44643e-05	0.00362391	0.00305091	CCN1/TNFAIP6/HSPE1/ERFE/PPARG/SPP1/PTGER4/TNF/HGF/SRGN/CHRDL2/JUNB/JUND	13	BP	upreg	CM
GO:0048545	response to steroid hormone	11/149	340/18986	0.0323529	4.1225	5.16704	7.91376e-05	0.00436322	0.00367333	ERRFI1/JUN/SPP1/TNF/HSPA1A/HSPA1B/INHBA/FOSL1/FOS/JUNB/JUND	11	BP	upreg	CM
GO:0002762	negative regulation of myeloid leukocyte differentiation	5/149	57/18986	0.0877193	11.1774	6.84392	8.3898e-05	0.00453841	0.00382082	TNFAIP6/ERFE/INHBA/TRIB1/MYC	5	BP	upreg	CM
GO:0006979	response to oxidative stress	12/149	405/18986	0.0296296	3.77549	5.02141	8.64192e-05	0.00458822	0.00386275	EPAS1/GPX3/HSPA1A/HSPA1B/HGF/SLC1A1/KLF4/FOSL1/CRYAB/FOS/KLF2/XBP1	12	BP	upreg	CM
GO:0071248	cellular response to metal ion	8/149	183/18986	0.0437158	5.5704	5.52533	0.000100143	0.00522019	0.0043948	SLC1A1/FOS/MT2A/MT1M/MT1A/MT1X/JUNB/JUND	8	BP	upreg	CM
GO:0097191	extrinsic apoptotic signaling pathway	9/149	236/18986	0.0381356	4.85934	5.30593	0.000105003	0.00537576	0.00452577	ATF3/TNF/HSPA1A/HSPA1B/INHBA/HGF/KLF4/ITPRIP/BAG3	9	BP	upreg	CM
GO:0045638	negative regulation of myeloid cell differentiation	6/149	99/18986	0.0606061	7.7226	5.96438	0.000129864	0.00653192	0.00549913	TNFAIP6/ERFE/H4C1/INHBA/TRIB1/MYC	6	BP	upreg	CM
GO:2001234	negative regulation of apoptotic signaling pathway	9/149	244/18986	0.0368852	4.70002	5.17349	0.000135126	0.00667944	0.00562332	CTH/TNF/HSPA1A/HSPA1B/HSPB1/HGF/KLF4/ITPRIP/XBP1	9	BP	upreg	CM
GO:0048661	positive regulation of smooth muscle cell proliferation	6/149	101/18986	0.0594059	7.56967	5.8876	0.000145005	0.00704626	0.00593214	JUN/ID2/TNF/ELANE/ADAMTS1/XBP1	6	BP	upreg	CM
GO:2001237	negative regulation of extrinsic apoptotic signaling pathway	6/149	102/18986	0.0588235	7.49546	5.85	0.000153082	0.00731477	0.0061582	TNF/HSPA1A/HSPA1B/HGF/KLF4/ITPRIP	6	BP	upreg	CM
GO:0032757	positive regulation of interleukin-8 production	5/149	65/18986	0.0769231	9.80176	6.32188	0.000157382	0.00739693	0.00622737	F3/TNF/HSPA1A/HSPA1B/ELANE	5	BP	upreg	CM
GO:0032102	negative regulation of response to external stimulus	12/149	437/18986	0.02746	3.49902	4.7005	0.000175911	0.00779606	0.00656339	TNFAIP6/PPARG/SPP1/PTGER4/DUSP1/TNF/PIM1/HGF/TRIB1/KLF4/ARG2/ELANE	12	BP	upreg	CM
GO:1901099	negative regulation of signal transduction in absence of ligand	4/149	36/18986	0.111111	14.1581	7.02801	0.000176511	0.00779606	0.00656339	TNF/HSPA1A/HSPA1B/KLF4	4	BP	upreg	CM
GO:2001240	negative regulation of extrinsic apoptotic signaling pathway in absence of ligand	4/149	36/18986	0.111111	14.1581	7.02801	0.000176511	0.00779606	0.00656339	TNF/HSPA1A/HSPA1B/KLF4	4	BP	upreg	CM
GO:0032637	interleukin-8 production	6/149	105/18986	0.0571429	7.2813	5.74017	0.00017947	0.00779606	0.00656339	F3/TNF/HSPA1A/HSPA1B/KLF4/ELANE	6	BP	upreg	CM
GO:0032677	regulation of interleukin-8 production	6/149	105/18986	0.0571429	7.2813	5.74017	0.00017947	0.00779606	0.00656339	F3/TNF/HSPA1A/HSPA1B/KLF4/ELANE	6	BP	upreg	CM
GO:0046688	response to copper ion	4/149	37/18986	0.108108	13.7754	6.91793	0.000196705	0.00840363	0.00707489	MT2A/MT1M/MT1A/MT1X	4	BP	upreg	CM
GO:0001890	placenta development	7/149	152/18986	0.0460526	5.86816	5.35929	0.000199319	0.00840363	0.00707489	CCN1/EPAS1/PPARG/SPP1/PRDM1/FOSL1/JUNB	7	BP	upreg	CM
GO:0034605	cellular response to heat	5/149	69/18986	0.0724638	9.23354	6.09365	0.000208819	0.00867657	0.00730467	HSPA6/IER5/HSPA1A/HSPA1B/BAG3	5	BP	upreg	CM
GO:0097306	cellular response to alcohol	6/149	110/18986	0.0545455	6.95034	5.56641	0.000231316	0.00930891	0.00783703	BTG2/PTGER4/INHBA/KLF4/FOS/KLF2	6	BP	upreg	CM
GO:1901655	cellular response to ketone	6/149	110/18986	0.0545455	6.95034	5.56641	0.000231316	0.00930891	0.00783703	BTG2/SPP1/PTGER4/KLF4/FOS/KLF2	6	BP	upreg	CM
GO:0045667	regulation of osteoblast differentiation	7/149	156/18986	0.0448718	5.71769	5.2621	0.000233778	0.00930891	0.00783703	CCN1/TNFAIP6/ERFE/PPARG/TNF/HGF/JUND	7	BP	upreg	CM
GO:0034616	response to laminar fluid shear stress	3/149	16/18986	0.1875	23.8918	8.14701	0.00024611	0.0096657	0.00813741	KLF4/KLF2/XBP1	3	BP	upreg	CM
GO:0001818	negative regulation of cytokine production	11/149	388/18986	0.0283505	3.6125	4.62415	0.000250672	0.00971184	0.00817626	IL1RL1/PTGER4/TNF/INHBA/HGF/KLF4/SRGN/ARG2/CCR7/ELANE/KLF2	11	BP	upreg	CM
GO:1904994	regulation of leukocyte adhesion to vascular endothelial cell	4/149	41/18986	0.097561	12.4315	6.51689	0.000294367	0.0112089	0.00943659	TNF/KLF4/ELANE/ITGB2	4	BP	upreg	CM
GO:1900102	negative regulation of endoplasmic reticulum unfolded protein response	3/149	17/18986	0.176471	22.4864	7.88239	0.000297131	0.0112089	0.00943659	HSPA5/PPP1R15A/XBP1	3	BP	upreg	CM
GO:0141091	transforming growth factor beta receptor superfamily signaling pathway	11/149	397/18986	0.0277078	3.53061	4.53194	0.000304806	0.0113491	0.0095546	JUN/CCN1/TNFAIP6/PPARG/HSPA1A/INHBA/HSPA5/CHRDL2/FOS/ID1/XBP1	11	BP	upreg	CM
GO:1902106	negative regulation of leukocyte differentiation	6/149	117/18986	0.0512821	6.5345	5.3406	0.000322955	0.0118707	0.00999372	ID2/TNFAIP6/ERFE/INHBA/TRIB1/MYC	6	BP	upreg	CM
GO:1903707	negative regulation of hemopoiesis	6/149	124/18986	0.0483871	6.16562	5.13254	0.000440889	0.015823	0.0133212	ID2/TNFAIP6/ERFE/INHBA/TRIB1/MYC	6	BP	upreg	CM
GO:0006809	nitric oxide biosynthetic process	5/149	81/18986	0.0617284	7.86561	5.50713	0.000441521	0.015823	0.0133212	TNF/KLF4/ARG2/KLF2/GLA	5	BP	upreg	CM
GO:1903573	negative regulation of response to endoplasmic reticulum stress	4/149	46/18986	0.0869565	11.0802	6.08769	0.000460142	0.0162868	0.0137116	HSPA1A/HSPA5/PPP1R15A/XBP1	4	BP	upreg	CM
GO:0032496	response to lipopolysaccharide	10/149	354/18986	0.0282486	3.59951	4.39093	0.000493825	0.0172658	0.0145358	PELI1/PTGER4/TNF/AKAP12/TRIB1/FOS/CSF3/CCR7/ELANE/XBP1	10	BP	upreg	CM
GO:0007178	cell surface receptor protein serine/threonine kinase signaling pathway	11/149	425/18986	0.0258824	3.298	4.26125	0.000540291	0.0186628	0.015712	JUN/CCN1/TNFAIP6/PPARG/HSPA1A/INHBA/HSPA5/CHRDL2/FOS/ID1/XBP1	11	BP	upreg	CM
GO:0030968	endoplasmic reticulum unfolded protein response	5/149	85/18986	0.0588235	7.49546	5.33789	0.000551249	0.0188147	0.0158398	CTH/ATF3/HSPA5/PPP1R15A/XBP1	5	BP	upreg	CM
GO:0008625	extrinsic apoptotic signaling pathway via death domain receptors	5/149	87/18986	0.0574713	7.32315	5.25734	0.00061323	0.0206839	0.0174135	ATF3/TNF/HGF/ITPRIP/BAG3	5	BP	upreg	CM
GO:0071498	cellular response to fluid shear stress	3/149	22/18986	0.136364	17.3758	6.83506	0.000653836	0.0217971	0.0183506	KLF4/KLF2/XBP1	3	BP	upreg	CM
GO:0046209	nitric oxide metabolic process	5/149	89/18986	0.0561798	7.15859	5.17931	0.000680296	0.0222711	0.0187497	TNF/KLF4/ARG2/KLF2/GLA	5	BP	upreg	CM
GO:0046686	response to cadmium ion	4/149	51/18986	0.0784314	9.99395	5.71999	0.000683593	0.0222711	0.0187497	MT2A/MT1M/MT1A/MT1X	4	BP	upreg	CM
GO:0010043	response to zinc ion	4/149	52/18986	0.0769231	9.80176	5.65252	0.00073608	0.0237117	0.0199625	MT2A/MT1M/MT1A/MT1X	4	BP	upreg	CM
GO:2001057	reactive nitrogen species metabolic process	5/149	91/18986	0.0549451	7.00125	5.10366	0.000752705	0.0239778	0.0201866	TNF/KLF4/ARG2/KLF2/GLA	5	BP	upreg	CM
GO:0002237	response to molecule of bacterial origin	10/149	375/18986	0.0266667	3.39794	4.17121	0.000770032	0.0242603	0.0204243	PELI1/PTGER4/TNF/AKAP12/TRIB1/FOS/CSF3/CCR7/ELANE/XBP1	10	BP	upreg	CM
GO:1904707	positive regulation of vascular associated smooth muscle cell proliferation	4/149	53/18986	0.0754717	9.61682	5.58686	0.000791355	0.024661	0.0207617	JUN/TNF/ADAMTS1/XBP1	4	BP	upreg	CM
GO:0030218	erythrocyte differentiation	6/149	139/18986	0.0431655	5.50027	4.73606	0.00080548	0.0248313	0.0209051	ID2/EPAS1/HSPA1A/HSPA1B/INHBA/KLF2	6	BP	upreg	CM
GO:0034599	cellular response to oxidative stress	8/149	251/18986	0.0318725	4.06129	4.34217	0.000837761	0.0255517	0.0215116	HSPA1A/HSPA1B/HGF/SLC1A1/KLF4/FOS/KLF2/XBP1	8	BP	upreg	CM
GO:1901673	regulation of mitotic spindle assembly	3/149	24/18986	0.125	15.9279	6.50809	0.000849509	0.0256373	0.0215836	HSPA1A/HSPA1B/CHMP1B	3	BP	upreg	CM
GO:1904705	regulation of vascular associated smooth muscle cell proliferation	5/149	94/18986	0.0531915	6.77781	4.99437	0.000871918	0.0260281	0.0219126	JUN/PPARG/TNF/ADAMTS1/XBP1	5	BP	upreg	CM
GO:1902107	positive regulation of leukocyte differentiation	7/149	195/18986	0.0358974	4.57415	4.46178	0.000889693	0.0260281	0.0219126	ID2/TNF/TRIB1/IL15RA/PNP/FOS/XBP1	7	BP	upreg	CM
GO:1903708	positive regulation of hemopoiesis	7/149	195/18986	0.0358974	4.57415	4.46178	0.000889693	0.0260281	0.0219126	ID2/TNF/TRIB1/IL15RA/PNP/FOS/XBP1	7	BP	upreg	CM
GO:0046631	alpha-beta T cell activation	7/149	196/18986	0.0357143	4.55081	4.44411	0.000916687	0.0265469	0.0223494	PTGER4/PRDM1/CLEC2B/HSPH1/PNP/ARG2/JUNB	7	BP	upreg	CM
GO:0070371	ERK1 and ERK2 cascade	9/149	319/18986	0.0282132	3.595	4.15708	0.000952012	0.0269786	0.0227129	CCN1/ATF3/PTGER4/TNF/AKAP12/INHBA/MYC/CCR7/XBP1	9	BP	upreg	CM
GO:1990874	vascular associated smooth muscle cell proliferation	5/149	96/18986	0.0520833	6.63661	4.92413	0.000958852	0.0269786	0.0227129	JUN/PPARG/TNF/ADAMTS1/XBP1	5	BP	upreg	CM
GO:2000272	negative regulation of signaling receptor activity	3/149	25/18986	0.12	15.2907	6.35897	0.000959823	0.0269786	0.0227129	ERRFI1/PPARG/TNF	3	BP	upreg	CM
GO:0031669	cellular response to nutrient levels	8/149	257/18986	0.0311284	3.96647	4.25835	0.000975656	0.0271573	0.0228634	ATF3/MAT2A/PIM1/INHBA/HSPA5/GABARAPL1/FOS/XBP1	8	BP	upreg	CM
GO:0060395	SMAD protein signal transduction	5/149	97/18986	0.0515464	6.56819	4.88976	0.00100466	0.0276957	0.0233166	JUN/PPARG/INHBA/FOS/XBP1	5	BP	upreg	CM
GO:1903037	regulation of leukocyte cell-cell adhesion	10/149	392/18986	0.0255102	3.25058	4.00446	0.00107751	0.0290582	0.0244636	PELI1/TNF/KLF4/HSPH1/PNP/ARG2/CCR7/ELANE/ITGB2/XBP1	10	BP	upreg	CM
GO:1904996	positive regulation of leukocyte adhesion to vascular endothelial cell	3/149	26/18986	0.115385	14.7026	6.21819	0.00107881	0.0290582	0.0244636	TNF/ELANE/ITGB2	3	BP	upreg	CM
GO:0045862	positive regulation of proteolysis	9/149	325/18986	0.0276923	3.52863	4.08933	0.00108449	0.0290582	0.0244636	F3/HSPE1/TNF/HSPA1A/HSPA1B/BAG2/TRIB1/MYC/XBP1	9	BP	upreg	CM
GO:0061756	leukocyte adhesion to vascular endothelial cell	4/149	58/18986	0.0689655	8.78778	5.28285	0.00111236	0.0295291	0.0248601	TNF/KLF4/ELANE/ITGB2	4	BP	upreg	CM
GO:0034101	erythrocyte homeostasis	6/149	150/18986	0.04	5.09691	4.48023	0.00119545	0.031168	0.0262399	ID2/EPAS1/HSPA1A/HSPA1B/INHBA/KLF2	6	BP	upreg	CM
GO:0045649	regulation of macrophage differentiation	3/149	27/18986	0.111111	14.1581	6.08499	0.00120671	0.031168	0.0262399	ID2/INHBA/TRIB1	3	BP	upreg	CM
GO:0070841	inclusion body assembly	3/149	27/18986	0.111111	14.1581	6.08499	0.00120671	0.031168	0.0262399	HSPA1A/HSPA1B/BAG3	3	BP	upreg	CM
GO:0009636	response to toxic substance	8/149	270/18986	0.0296296	3.77549	4.08515	0.00133703	0.0340942	0.0287034	GPX3/TNF/PIM1/FOS/MT2A/MT1M/MT1A/MT1X	8	BP	upreg	CM
GO:0002675	positive regulation of acute inflammatory response	3/149	28/18986	0.107143	13.6524	5.95868	0.00134379	0.0340942	0.0287034	TNF/C2CD4A/CCR7	3	BP	upreg	CM
GO:0044703	multi-organism reproductive process	7/149	210/18986	0.0333333	4.24743	4.20862	0.001367	0.0343788	0.028943	ERRFI1/SPP1/PRDM1/TAC1/FOSL1/FOS/JUNB	7	BP	upreg	CM
GO:0032602	chemokine production	5/149	105/18986	0.047619	6.06775	4.63116	0.00143187	0.0353895	0.0297938	IL1RL1/TNF/KLF4/ARG2/ELANE	5	BP	upreg	CM
GO:0032642	regulation of chemokine production	5/149	105/18986	0.047619	6.06775	4.63116	0.00143187	0.0353895	0.0297938	IL1RL1/TNF/KLF4/ARG2/ELANE	5	BP	upreg	CM
GO:0043086	negative regulation of catalytic activity	11/149	486/18986	0.0226337	2.88406	3.74213	0.00160042	0.039031	0.0328596	ERRFI1/GPR87/RARRES1/DUSP1/TNF/BAG2/HSPB1/TRIB1/SLN/SERPINA3/GLA	11	BP	upreg	CM
GO:0002763	positive regulation of myeloid leukocyte differentiation	4/149	64/18986	0.0625	7.96393	4.9631	0.00160644	0.039031	0.0328596	ID2/TNF/TRIB1/FOS	4	BP	upreg	CM
GO:0010038	response to metal ion	9/149	345/18986	0.026087	3.32407	3.87452	0.00163786	0.0393351	0.0331156	SLC1A1/KCNMB4/FOS/MT2A/MT1M/MT1A/MT1X/JUNB/JUND	9	BP	upreg	CM
GO:0002438	acute inflammatory response to antigenic stimulus	3/149	30/18986	0.1	12.7423	5.72443	0.00164639	0.0393351	0.0331156	FCGR2A/CCR7/ELANE	3	BP	upreg	CM
GO:0044706	multi-multicellular organism process	7/149	218/18986	0.0321101	4.09156	4.08309	0.00169271	0.0401075	0.0337659	ERRFI1/SPP1/PRDM1/TAC1/FOSL1/FOS/JUNB	7	BP	upreg	CM
GO:0032611	interleukin-1 beta production	5/149	110/18986	0.0454545	5.79195	4.48276	0.00175912	0.0410033	0.03452	TNF/HSPB1/S1PR3/ARG2/CCR7	5	BP	upreg	CM
GO:0032651	regulation of interleukin-1 beta production	5/149	110/18986	0.0454545	5.79195	4.48276	0.00175912	0.0410033	0.03452	TNF/HSPB1/S1PR3/ARG2/CCR7	5	BP	upreg	CM
GO:0045428	regulation of nitric oxide biosynthetic process	4/149	66/18986	0.0606061	7.7226	4.86565	0.00180031	0.041625	0.0350434	TNF/KLF4/KLF2/GLA	4	BP	upreg	CM
GO:0030316	osteoclast differentiation	5/149	112/18986	0.0446429	5.68852	4.42594	0.00190426	0.0436762	0.0367703	TNFAIP6/ERFE/TNF/FOS/JUNB	5	BP	upreg	CM
GO:0045619	regulation of lymphocyte differentiation	7/149	223/18986	0.0313901	3.99982	4.00764	0.00192505	0.0438025	0.0368767	ID2/PRDM1/INHBA/IL15RA/PNP/JUNB/XBP1	7	BP	upreg	CM
GO:0032682	negative regulation of chemokine production	3/149	32/18986	0.09375	11.9459	5.51148	0.00198844	0.0439864	0.0370315	KLF4/ARG2/ELANE	3	BP	upreg	CM
GO:1900101	regulation of endoplasmic reticulum unfolded protein response	3/149	32/18986	0.09375	11.9459	5.51148	0.00198844	0.0439864	0.0370315	HSPA5/PPP1R15A/XBP1	3	BP	upreg	CM
GO:0030098	lymphocyte differentiation	10/149	426/18986	0.0234742	2.99115	3.69668	0.00199494	0.0439864	0.0370315	ID2/PTGER4/PRDM1/INHBA/KLF6/IL15RA/PNP/CCR7/JUNB/XBP1	10	BP	upreg	CM
GO:0045668	negative regulation of osteoblast differentiation	4/149	68/18986	0.0588235	7.49546	4.77221	0.00200984	0.0439864	0.0370315	TNFAIP6/ERFE/PPARG/TNF	4	BP	upreg	CM
GO:0080164	regulation of nitric oxide metabolic process	4/149	68/18986	0.0588235	7.49546	4.77221	0.00200984	0.0439864	0.0370315	TNF/KLF4/KLF2/GLA	4	BP	upreg	CM
GO:0045859	regulation of protein kinase activity	10/149	427/18986	0.0234192	2.98414	3.68809	0.00202931	0.0440761	0.037107	ERRFI1/CCN1/DUSP1/TNF/PIM1/HSPB1/TRIB1/CCR7/ELANE/SERTAD1	10	BP	upreg	CM
GO:1901800	positive regulation of proteasomal protein catabolic process	5/149	114/18986	0.0438596	5.58872	4.37046	0.00205798	0.0441636	0.0371807	HSPA1A/HSPA1B/BAG2/TRIB1/XBP1	5	BP	upreg	CM
GO:0098754	detoxification	6/149	167/18986	0.0359281	4.57807	4.13048	0.00206415	0.0441636	0.0371807	GPX3/PIM1/MT2A/MT1M/MT1A/MT1X	6	BP	upreg	CM
GO:0030225	macrophage differentiation	4/149	69/18986	0.057971	7.38683	4.7269	0.00212067	0.0445368	0.0374949	ID2/IL1RL1/INHBA/TRIB1	4	BP	upreg	CM
GO:0007159	leukocyte cell-cell adhesion	10/149	430/18986	0.0232558	2.96332	3.66249	0.0021353	0.0445368	0.0374949	PELI1/TNF/KLF4/HSPH1/PNP/ARG2/CCR7/ELANE/ITGB2/XBP1	10	BP	upreg	CM
GO:0015813	L-glutamate transmembrane transport	3/149	33/18986	0.0909091	11.5839	5.41198	0.0021748	0.0445368	0.0374949	TNF/SLC1A1/SLC25A18	3	BP	upreg	CM
GO:0045648	positive regulation of erythrocyte differentiation	3/149	33/18986	0.0909091	11.5839	5.41198	0.0021748	0.0445368	0.0374949	HSPA1A/HSPA1B/INHBA	3	BP	upreg	CM
GO:0050869	negative regulation of B cell activation	3/149	33/18986	0.0909091	11.5839	5.41198	0.0021748	0.0445368	0.0374949	ID2/INHBA/SAMSN1	3	BP	upreg	CM
GO:0060674	placenta blood vessel development	3/149	33/18986	0.0909091	11.5839	5.41198	0.0021748	0.0445368	0.0374949	CCN1/FOSL1/JUNB	3	BP	upreg	CM
GO:0045600	positive regulation of fat cell differentiation	4/149	71/18986	0.056338	7.17875	4.63894	0.00235486	0.0478822	0.0403113	ID2/PPARG/PIM1/XBP1	4	BP	upreg	CM
GO:0090169	regulation of spindle assembly	3/149	34/18986	0.0882353	11.2432	5.31667	0.00237165	0.047884	0.0403128	HSPA1A/HSPA1B/CHMP1B	3	BP	upreg	CM
GO:0043409	negative regulation of MAPK cascade	6/149	172/18986	0.0348837	4.44498	4.03648	0.00239303	0.047913	0.0403372	ATF3/PPARG/DUSP1/MYC/DUSP8/XBP1	6	BP	upreg	CM
GO:0031348	negative regulation of defense response	8/149	297/18986	0.026936	3.43226	3.75741	0.00242589	0.047913	0.0403372	TNFAIP6/PPARG/PTGER4/PIM1/HGF/KLF4/ARG2/ELANE	8	BP	upreg	CM
GO:0045165	cell fate commitment	8/149	297/18986	0.026936	3.43226	3.75741	0.00242589	0.047913	0.0403372	ID2/EPAS1/PPARG/PRDM1/IFRD1/KLF4/ETS2/ARX	8	BP	upreg	CM
GO:0050727	regulation of inflammatory response	10/149	438/18986	0.0228311	2.9092	3.59527	0.00243994	0.047913	0.0403372	IL1RL1/TNFAIP6/PPARG/PTGER4/TNF/HGF/KLF4/C2CD4A/CCR7/ELANE	10	BP	upreg	CM
GO:0030308	negative regulation of cell growth	6/149	173/18986	0.0346821	4.41929	4.01811	0.00246328	0.0480423	0.0404461	SPP1/HSPA1A/HSPA1B/INHBA/IFRD1/CRYAB	6	BP	upreg	CM
GO:0001893	maternal placenta development	3/149	35/18986	0.0857143	10.922	5.22526	0.0025792	0.0492529	0.0414653	SPP1/PRDM1/JUNB	3	BP	upreg	CM
GO:0045577	regulation of B cell differentiation	3/149	35/18986	0.0857143	10.922	5.22526	0.0025792	0.0492529	0.0414653	ID2/INHBA/XBP1	3	BP	upreg	CM
GO:0045670	regulation of osteoclast differentiation	4/149	73/18986	0.0547945	6.98207	4.55434	0.00260628	0.0492529	0.0414653	TNFAIP6/ERFE/TNF/FOS	4	BP	upreg	CM
GO:0006527	arginine catabolic process	2/149	10/18986	0.2	25.4846	6.88783	0.00264164	0.0492529	0.0414653	OAT/ARG2	2	BP	upreg	CM
GO:0009750	response to fructose	2/149	10/18986	0.2	25.4846	6.88783	0.00264164	0.0492529	0.0414653	TNF/XBP1	2	BP	upreg	CM
GO:0070432	regulation of nucleotide-binding oligomerization domain containing 2 signaling pathway	2/149	10/18986	0.2	25.4846	6.88783	0.00264164	0.0492529	0.0414653	HSPA1A/HSPA1B	2	BP	upreg	CM
GO:0050821	protein stabilization	7/149	236/18986	0.029661	3.77949	3.82132	0.0026456	0.0492529	0.0414653	ATP1B3/HSPA1A/HSPA1B/PIM1/BAG2/BAG3/CRYAB	7	BP	upreg	CM
GO:0046634	regulation of alpha-beta T cell activation	5/149	122/18986	0.0409836	5.22225	4.16101	0.00276455	0.0511352	0.04305	PRDM1/HSPH1/PNP/ARG2/JUNB	5	BP	upreg	CM
GO:0034405	response to fluid shear stress	3/149	36/18986	0.0833333	10.6186	5.13747	0.00279762	0.0514153	0.0432857	KLF4/KLF2/XBP1	3	BP	upreg	CM
GO:0032008	positive regulation of TOR signaling	4/149	75/18986	0.0533333	6.79588	4.47286	0.00287552	0.0525103	0.0442076	F3/MAT2A/PIM1/XBP1	4	BP	upreg	CM
GO:0072593	reactive oxygen species metabolic process	7/149	242/18986	0.0289256	3.68578	3.73973	0.00304096	0.0551799	0.0464551	CCN1/GPX3/TNF/SLC1A1/CRYAB/ARG2/ITGB2	7	BP	upreg	CM
GO:0006959	humoral immune response	8/149	310/18986	0.0258065	3.28833	3.61285	0.0031524	0.0564972	0.0475641	CFH/CFI/TNF/TREM1/TAC1/COLEC10/CCR7/ELANE	8	BP	upreg	CM
GO:0070778	L-aspartate transmembrane transport	2/149	11/18986	0.181818	23.1678	6.54064	0.00321208	0.0564972	0.0475641	SLC1A1/SLC25A18	2	BP	upreg	CM
GO:1904627	response to phorbol 13-acetate 12-myristate	2/149	11/18986	0.181818	23.1678	6.54064	0.00321208	0.0564972	0.0475641	BTG2/FOS	2	BP	upreg	CM
GO:1904628	cellular response to phorbol 13-acetate 12-myristate	2/149	11/18986	0.181818	23.1678	6.54064	0.00321208	0.0564972	0.0475641	BTG2/FOS	2	BP	upreg	CM
GO:2000347	positive regulation of hepatocyte proliferation	2/149	11/18986	0.181818	23.1678	6.54064	0.00321208	0.0564972	0.0475641	TNF/XBP1	2	BP	upreg	CM
GO:0002262	myeloid cell homeostasis	6/149	183/18986	0.0327869	4.1778	3.84176	0.00325406	0.0567814	0.0478034	ID2/EPAS1/HSPA1A/HSPA1B/INHBA/KLF2	6	BP	upreg	CM
GO:0051385	response to mineralocorticoid	3/149	38/18986	0.0789474	10.0597	4.97183	0.00326785	0.0567814	0.0478034	INHBA/FOSL1/FOS	3	BP	upreg	CM
GO:0043549	regulation of kinase activity	10/149	460/18986	0.0217391	2.77006	3.41798	0.00346121	0.0597788	0.0503269	ERRFI1/CCN1/DUSP1/TNF/PIM1/HSPB1/TRIB1/CCR7/ELANE/SERTAD1	10	BP	upreg	CM
GO:0002446	neutrophil mediated immunity	3/149	39/18986	0.0769231	9.80176	4.89355	0.00352001	0.0604303	0.0508753	TREM1/ELANE/ITGB2	3	BP	upreg	CM
GO:1902475	L-alpha-amino acid transmembrane transport	4/149	80/18986	0.05	6.37114	4.28158	0.00363062	0.0609732	0.0513324	TNF/SLC7A2/SLC1A1/SLC25A18	4	BP	upreg	CM
GO:0032612	interleukin-1 production	5/149	130/18986	0.0384615	4.90088	3.96919	0.00363212	0.0609732	0.0513324	TNF/HSPB1/S1PR3/ARG2/CCR7	5	BP	upreg	CM
GO:0032652	regulation of interleukin-1 production	5/149	130/18986	0.0384615	4.90088	3.96919	0.00363212	0.0609732	0.0513324	TNF/HSPB1/S1PR3/ARG2/CCR7	5	BP	upreg	CM
GO:0007179	transforming growth factor beta receptor signaling pathway	7/149	250/18986	0.028	3.56784	3.6349	0.0036367	0.0609732	0.0513324	JUN/PPARG/HSPA1A/HSPA5/FOS/ID1/XBP1	7	BP	upreg	CM
GO:0007565	female pregnancy	6/149	189/18986	0.031746	4.04517	3.74189	0.00381143	0.0617647	0.0519987	ERRFI1/SPP1/PRDM1/FOSL1/FOS/JUNB	6	BP	upreg	CM
GO:0048012	hepatocyte growth factor receptor signaling pathway	2/149	12/18986	0.166667	21.2371	6.23667	0.00383471	0.0617647	0.0519987	ESM1/HGF	2	BP	upreg	CM
GO:0048671	negative regulation of collateral sprouting	2/149	12/18986	0.166667	21.2371	6.23667	0.00383471	0.0617647	0.0519987	SPP1/IFRD1	2	BP	upreg	CM
GO:0061723	glycophagy	2/149	12/18986	0.166667	21.2371	6.23667	0.00383471	0.0617647	0.0519987	STBD1/GABARAPL1	2	BP	upreg	CM
GO:0070944	neutrophil-mediated killing of bacterium	2/149	12/18986	0.166667	21.2371	6.23667	0.00383471	0.0617647	0.0519987	TREM1/ELANE	2	BP	upreg	CM
GO:0090084	negative regulation of inclusion body assembly	2/149	12/18986	0.166667	21.2371	6.23667	0.00383471	0.0617647	0.0519987	HSPA1A/HSPA1B	2	BP	upreg	CM
GO:1903897	regulation of PERK-mediated unfolded protein response	2/149	12/18986	0.166667	21.2371	6.23667	0.00383471	0.0617647	0.0519987	HSPA5/PPP1R15A	2	BP	upreg	CM
GO:0001704	formation of primary germ layer	5/149	132/18986	0.0378788	4.82662	3.92368	0.00387641	0.0619705	0.052172	DUSP1/INHBA/KLF4/ETS2/ITGB2	5	BP	upreg	CM
GO:0062197	cellular response to chemical stress	8/149	321/18986	0.0249221	3.17565	3.49639	0.00389072	0.0619705	0.052172	HSPA1A/HSPA1B/HGF/SLC1A1/KLF4/FOS/KLF2/XBP1	8	BP	upreg	CM
GO:0044403	biological process involved in symbiotic interaction	8/149	322/18986	0.0248447	3.16578	3.48605	0.00396394	0.062788	0.0528603	JUN/HSPA1A/HSPA1B/TREM1/CH25H/IFITM3/CHMP1B/ELANE	8	BP	upreg	CM
GO:0050864	regulation of B cell activation	5/149	133/18986	0.037594	4.79033	3.90126	0.00400286	0.0628561	0.0529176	ID2/PELI1/INHBA/SAMSN1/XBP1	5	BP	upreg	CM
GO:0006694	steroid biosynthetic process	6/149	191/18986	0.0314136	4.00281	3.70951	0.00401209	0.0628561	0.0529176	ERRFI1/TNF/INHBA/IDI1/CH25H/SDR42E2	6	BP	upreg	CM
GO:0051897	positive regulation of phosphatidylinositol 3-kinase/protein kinase B signal transduction	6/149	192/18986	0.03125	3.98196	3.69348	0.0041153	0.0641227	0.0539839	ERFE/TNF/HGF/CSF3/CCR7/XBP1	6	BP	upreg	CM
GO:0090092	regulation of transmembrane receptor protein serine/threonine kinase signaling pathway	8/149	326/18986	0.0245399	3.12694	3.44509	0.00426758	0.0661359	0.0556788	CCN1/TNFAIP6/PPARG/HSPA1A/INHBA/HSPA5/CHRDL2/XBP1	8	BP	upreg	CM
GO:0045429	positive regulation of nitric oxide biosynthetic process	3/149	42/18986	0.0714286	9.10163	4.6747	0.00434659	0.0669982	0.0564048	TNF/KLF4/KLF2	3	BP	upreg	CM
GO:0060326	cell chemotaxis	8/149	328/18986	0.0243902	3.10787	3.42485	0.00442597	0.0677001	0.0569957	TNFAIP6/DUSP1/TREM1/HSPB1/HGF/CH25H/CCR7/ITGB2	8	BP	upreg	CM
GO:0002863	positive regulation of inflammatory response to antigenic stimulus	2/149	13/18986	0.153846	19.6035	5.96748	0.00450868	0.0677001	0.0569957	TNF/CCR7	2	BP	upreg	CM
GO:0032823	regulation of natural killer cell differentiation	2/149	13/18986	0.153846	19.6035	5.96748	0.00450868	0.0677001	0.0569957	PRDM1/IL15RA	2	BP	upreg	CM
GO:0002437	inflammatory response to antigenic stimulus	4/149	85/18986	0.0470588	5.99637	4.10595	0.00451019	0.0677001	0.0569957	FCGR2A/TNF/CCR7/ELANE	4	BP	upreg	CM
GO:0030593	neutrophil chemotaxis	4/149	85/18986	0.0470588	5.99637	4.10595	0.00451019	0.0677001	0.0569957	TNFAIP6/TREM1/CCR7/ITGB2	4	BP	upreg	CM
GO:1903052	positive regulation of proteolysis involved in protein catabolic process	5/149	137/18986	0.0364964	4.65047	3.81379	0.00453832	0.0677675	0.0570524	HSPA1A/HSPA1B/BAG2/TRIB1/XBP1	5	BP	upreg	CM
GO:0051938	L-glutamate import	3/149	43/18986	0.0697674	8.88996	4.60657	0.004646	0.0680816	0.0573169	TNF/SLC1A1/SLC25A18	3	BP	upreg	CM
GO:1904407	positive regulation of nitric oxide metabolic process	3/149	43/18986	0.0697674	8.88996	4.60657	0.004646	0.0680816	0.0573169	TNF/KLF4/KLF2	3	BP	upreg	CM
GO:0036293	response to decreased oxygen levels	8/149	331/18986	0.0241692	3.07971	3.39477	0.00467201	0.0680816	0.0573169	EPAS1/PPARG/TNF/INHBA/MYC/SLC1A1/CRYAB/FOS	8	BP	upreg	CM
GO:0050900	leukocyte migration	9/149	404/18986	0.0222772	2.83863	3.32224	0.0046739	0.0680816	0.0573169	TNFAIP6/PTGER4/DUSP1/TNF/TREM1/CH25H/CCR7/ELANE/ITGB2	9	BP	upreg	CM
GO:0050768	negative regulation of neurogenesis	5/149	138/18986	0.0362319	4.61677	3.79245	0.00467977	0.0680816	0.0573169	BTG2/DNAJB11/SPP1/TNF/IFRD1	5	BP	upreg	CM
GO:0048678	response to axon injury	4/149	86/18986	0.0465116	5.92664	4.07251	0.00470183	0.0680816	0.0573169	SPP1/SLC1A1/KLF4/FLRT3	4	BP	upreg	CM
GO:0061136	regulation of proteasomal protein catabolic process	6/149	199/18986	0.0301508	3.84189	3.58425	0.00489373	0.070017	0.0589463	HSPA1A/HSPA1B/BAG2/TRIB1/ARHGAP5-AS1/XBP1	6	BP	upreg	CM
GO:0001892	embryonic placenta development	4/149	87/18986	0.045977	5.85852	4.03959	0.00489887	0.070017	0.0589463	CCN1/EPAS1/PRDM1/JUNB	4	BP	upreg	CM
GO:0032570	response to progesterone	3/149	44/18986	0.0681818	8.68792	4.54062	0.0049576	0.070017	0.0589463	ERRFI1/FOSL1/FOS	3	BP	upreg	CM
GO:0060236	regulation of mitotic spindle organization	3/149	44/18986	0.0681818	8.68792	4.54062	0.0049576	0.070017	0.0589463	HSPA1A/HSPA1B/CHMP1B	3	BP	upreg	CM
GO:1900744	regulation of p38MAPK cascade	3/149	44/18986	0.0681818	8.68792	4.54062	0.0049576	0.070017	0.0589463	DUSP1/HGF/GADD45B	3	BP	upreg	CM
GO:0000302	response to reactive oxygen species	6/149	200/18986	0.03	3.82268	3.56905	0.00501319	0.070455	0.059315	HGF/KLF4/FOSL1/CRYAB/FOS/KLF2	6	BP	upreg	CM
GO:1905897	regulation of response to endoplasmic reticulum stress	4/149	88/18986	0.0454545	5.79195	4.00717	0.00510139	0.070771	0.059581	HSPA1A/HSPA5/PPP1R15A/XBP1	4	BP	upreg	CM
GO:0001878	response to yeast	2/149	14/18986	0.142857	18.2033	5.72678	0.00523315	0.070771	0.059581	TAC1/ELANE	2	BP	upreg	CM
GO:0042541	hemoglobin biosynthetic process	2/149	14/18986	0.142857	18.2033	5.72678	0.00523315	0.070771	0.059581	INHBA/KLF4	2	BP	upreg	CM
GO:0070943	neutrophil-mediated killing of symbiont cell	2/149	14/18986	0.142857	18.2033	5.72678	0.00523315	0.070771	0.059581	TREM1/ELANE	2	BP	upreg	CM
GO:0098840	protein transport along microtubule	2/149	14/18986	0.142857	18.2033	5.72678	0.00523315	0.070771	0.059581	HSPB1/BAG3	2	BP	upreg	CM
GO:0099118	microtubule-based protein transport	2/149	14/18986	0.142857	18.2033	5.72678	0.00523315	0.070771	0.059581	HSPB1/BAG3	2	BP	upreg	CM
GO:1901653	cellular response to peptide	2/149	14/18986	0.142857	18.2033	5.72678	0.00523315	0.070771	0.059581	KLF4/KLF2	2	BP	upreg	CM
GO:1903265	positive regulation of tumor necrosis factor-mediated signaling pathway	2/149	14/18986	0.142857	18.2033	5.72678	0.00523315	0.070771	0.059581	HSPA1A/HSPA1B	2	BP	upreg	CM
GO:0000184	nuclear-transcribed mRNA catabolic process, nonsense-mediated decay	3/149	45/18986	0.0666667	8.49485	4.47673	0.00528153	0.0710899	0.0598495	PNRC2/PNRC1/EIF4A3	3	BP	upreg	CM
GO:0009791	post-embryonic development	4/149	89/18986	0.0449438	5.72687	3.97525	0.00530944	0.0711316	0.0598846	CSRNP1/GABRG2/PRDM1/KLF4	4	BP	upreg	CM
GO:0050728	negative regulation of inflammatory response	6/149	203/18986	0.0295567	3.76619	3.52404	0.00538445	0.071801	0.0604482	TNFAIP6/PPARG/PTGER4/HGF/KLF4/ELANE	6	BP	upreg	CM
GO:0008306	associative learning	4/149	90/18986	0.0444444	5.66324	3.94381	0.00552309	0.0733088	0.0617176	BTG2/SLC1A1/FOS/EIF4A3	4	BP	upreg	CM
GO:0045646	regulation of erythrocyte differentiation	3/149	46/18986	0.0652174	8.31018	4.41479	0.0056179	0.0741649	0.0624384	HSPA1A/HSPA1B/INHBA	3	BP	upreg	CM
GO:0090101	negative regulation of transmembrane receptor protein serine/threonine kinase signaling pathway	6/149	205/18986	0.0292683	3.72945	3.4945	0.0056429	0.0741649	0.0624384	TNFAIP6/PPARG/HSPA1A/HSPA5/CHRDL2/XBP1	6	BP	upreg	CM
GO:0031400	negative regulation of protein modification process	8/149	342/18986	0.0233918	2.98065	3.28734	0.0056652	0.0741649	0.0624384	ERRFI1/DUSP1/HSPA1A/HSPA1B/BAG2/HSPB1/TRIB1/SAMSN1	8	BP	upreg	CM
GO:0019216	regulation of lipid metabolic process	8/149	344/18986	0.0232558	2.96332	3.26826	0.00586188	0.076391	0.0643124	CCN1/ID2/ERFE/PPARG/TNF/CH25H/SERPINA3/XBP1	8	BP	upreg	CM
GO:0051961	negative regulation of nervous system development	5/149	146/18986	0.0342466	4.3638	3.62876	0.0059264	0.0768823	0.0647261	BTG2/DNAJB11/SPP1/TNF/IFRD1	5	BP	upreg	CM
GO:0032273	positive regulation of protein polymerization	4/149	92/18986	0.0434783	5.54012	3.88233	0.00596749	0.0768882	0.064731	HSPA1A/HSPA1B/CSF3/CCR7	4	BP	upreg	CM
GO:0051412	response to corticosterone	2/149	15/18986	0.133333	16.9897	5.50977	0.00600731	0.0768882	0.064731	FOSL1/FOS	2	BP	upreg	CM
GO:0070424	regulation of nucleotide-binding domain, leucine rich repeat containing receptor signaling pathway	2/149	15/18986	0.133333	16.9897	5.50977	0.00600731	0.0768882	0.064731	HSPA1A/HSPA1B	2	BP	upreg	CM
GO:0045598	regulation of fat cell differentiation	5/149	147/18986	0.0340136	4.33411	3.60913	0.00609715	0.0776912	0.0654071	ID2/PPARG/TNF/PIM1/XBP1	5	BP	upreg	CM
GO:0003018	vascular process in circulatory system	7/149	276/18986	0.0253623	3.23174	3.32165	0.00619871	0.0785448	0.0661257	TNF/AKAP12/SLC7A2/SLC1A1/KCNMB4/C2CD4A/KLF2	7	BP	upreg	CM
GO:0034976	response to endoplasmic reticulum stress	7/149	277/18986	0.0252708	3.22007	3.31035	0.00631867	0.0785448	0.0661257	JUN/CTH/ATF3/HSPA1A/HSPA5/PPP1R15A/XBP1	7	BP	upreg	CM
GO:0002673	regulation of acute inflammatory response	3/149	48/18986	0.0625	7.96393	4.29636	0.00632851	0.0785448	0.0661257	TNF/C2CD4A/CCR7	3	BP	upreg	CM
GO:0002920	regulation of humoral immune response	3/149	48/18986	0.0625	7.96393	4.29636	0.00632851	0.0785448	0.0661257	CFH/TNF/CCR7	3	BP	upreg	CM
GO:0006984	ER-nucleus signaling pathway	3/149	48/18986	0.0625	7.96393	4.29636	0.00632851	0.0785448	0.0661257	HSPA5/PPP1R15A/XBP1	3	BP	upreg	CM
GO:0090224	regulation of spindle organization	3/149	48/18986	0.0625	7.96393	4.29636	0.00632851	0.0785448	0.0661257	HSPA1A/HSPA1B/CHMP1B	3	BP	upreg	CM
GO:1902041	regulation of extrinsic apoptotic signaling pathway via death domain receptors	3/149	49/18986	0.0612245	7.8014	4.23968	0.00670298	0.0828338	0.0697365	ATF3/HGF/ITPRIP	3	BP	upreg	CM
GO:0045732	positive regulation of protein catabolic process	6/149	213/18986	0.028169	3.58938	3.37995	0.0067681	0.0829771	0.0698571	TNF/HSPA1A/HSPA1B/BAG2/TRIB1/XBP1	6	BP	upreg	CM
GO:0030728	ovulation	2/149	16/18986	0.125	15.9279	5.31271	0.00683034	0.0829771	0.0698571	INHBA/ADAMTS1	2	BP	upreg	CM
GO:0061043	regulation of vascular wound healing	2/149	16/18986	0.125	15.9279	5.31271	0.00683034	0.0829771	0.0698571	TNF/XBP1	2	BP	upreg	CM
GO:0070942	neutrophil mediated cytotoxicity	2/149	16/18986	0.125	15.9279	5.31271	0.00683034	0.0829771	0.0698571	TREM1/ELANE	2	BP	upreg	CM
GO:0032006	regulation of TOR signaling	5/149	152/18986	0.0328947	4.19154	3.51353	0.00700311	0.0847169	0.0713219	F3/PELI1/MAT2A/PIM1/XBP1	5	BP	upreg	CM
GO:0022602	ovulation cycle process	3/149	50/18986	0.06	7.64537	4.18459	0.00709037	0.0850548	0.0716064	TNFAIP6/INHBA/ADAMTS1	3	BP	upreg	CM
GO:0031670	cellular response to nutrient	3/149	50/18986	0.06	7.64537	4.18459	0.00709037	0.0850548	0.0716064	MAT2A/PIM1/XBP1	3	BP	upreg	CM
GO:2001235	positive regulation of apoptotic signaling pathway	5/149	153/18986	0.0326797	4.16414	3.4949	0.00719499	0.0856468	0.0721047	ATF3/PPARG/TNF/INHBA/MYC	5	BP	upreg	CM
GO:1903039	positive regulation of leukocyte cell-cell adhesion	7/149	284/18986	0.0246479	3.1407	3.23269	0.00720754	0.0856468	0.0721047	TNF/HSPH1/PNP/CCR7/ELANE/ITGB2/XBP1	7	BP	upreg	CM
GO:0050920	regulation of chemotaxis	6/149	216/18986	0.0277778	3.53952	3.33841	0.00722934	0.0856468	0.0721047	F3/TNFAIP6/DUSP1/HSPB1/CCR7/ELANE	6	BP	upreg	CM
GO:0070482	response to oxygen levels	8/149	358/18986	0.0223464	2.84744	3.13849	0.00738815	0.0870132	0.0732551	EPAS1/PPARG/TNF/INHBA/MYC/SLC1A1/CRYAB/FOS	8	BP	upreg	CM
GO:0089718	amino acid import across plasma membrane	3/149	51/18986	0.0588235	7.49546	4.131	0.0074908	0.0870132	0.0732551	TNF/SLC7A2/SLC1A1	3	BP	upreg	CM
GO:0045765	regulation of angiogenesis	8/149	360/18986	0.0222222	2.83162	3.12046	0.00762858	0.0870132	0.0732551	F3/PPARG/TNF/HSPB1/KLF4/KLF2/ADAMTS1/XBP1	8	BP	upreg	CM
GO:0036005	response to macrophage colony-stimulating factor	2/149	17/18986	0.117647	14.9909	5.13264	0.00770144	0.0870132	0.0732551	SPP1/TNF	2	BP	upreg	CM
GO:0045651	positive regulation of macrophage differentiation	2/149	17/18986	0.117647	14.9909	5.13264	0.00770144	0.0870132	0.0732551	ID2/TRIB1	2	BP	upreg	CM
GO:0051782	negative regulation of cell division	2/149	17/18986	0.117647	14.9909	5.13264	0.00770144	0.0870132	0.0732551	MYC/TEX14	2	BP	upreg	CM
GO:0098712	L-glutamate import across plasma membrane	2/149	17/18986	0.117647	14.9909	5.13264	0.00770144	0.0870132	0.0732551	TNF/SLC1A1	2	BP	upreg	CM
GO:1901550	regulation of endothelial cell development	2/149	17/18986	0.117647	14.9909	5.13264	0.00770144	0.0870132	0.0732551	TNF/S1PR3	2	BP	upreg	CM
GO:1903140	regulation of establishment of endothelial barrier	2/149	17/18986	0.117647	14.9909	5.13264	0.00770144	0.0870132	0.0732551	TNF/S1PR3	2	BP	upreg	CM
GO:2000345	regulation of hepatocyte proliferation	2/149	17/18986	0.117647	14.9909	5.13264	0.00770144	0.0870132	0.0732551	TNF/XBP1	2	BP	upreg	CM
GO:0042542	response to hydrogen peroxide	4/149	99/18986	0.040404	5.1484	3.68052	0.00770887	0.0870132	0.0732551	KLF4/FOSL1/CRYAB/KLF2	4	BP	upreg	CM
GO:0043280	positive regulation of cysteine-type endopeptidase activity involved in apoptotic process	4/149	99/18986	0.040404	5.1484	3.68052	0.00770887	0.0870132	0.0732551	F3/HSPE1/TNF/MYC	4	BP	upreg	CM
GO:0071456	cellular response to hypoxia	5/149	156/18986	0.0320513	4.08406	3.43996	0.00779264	0.0872715	0.0734725	EPAS1/PPARG/INHBA/MYC/FOS	5	BP	upreg	CM
GO:0097530	granulocyte migration	5/149	156/18986	0.0320513	4.08406	3.43996	0.00779264	0.0872715	0.0734725	TNFAIP6/PTGER4/TREM1/CCR7/ITGB2	5	BP	upreg	CM
GO:0050922	negative regulation of chemotaxis	3/149	52/18986	0.0576923	7.35132	4.07884	0.00790435	0.0881781	0.0742358	TNFAIP6/DUSP1/ELANE	3	BP	upreg	CM
GO:0071229	cellular response to acid chemical	4/149	100/18986	0.04	5.09691	3.65325	0.00798208	0.0885586	0.0745562	MAT2A/TNF/KLF2/XBP1	4	BP	upreg	CM
GO:0051090	regulation of DNA-binding transcription factor activity	8/149	363/18986	0.0220386	2.80822	3.09365	0.00800024	0.0885586	0.0745562	CTH/ID2/TNF/HSPA1A/HSPA1B/PIM1/TRIB1/ID1	8	BP	upreg	CM
GO:0071356	cellular response to tumor necrosis factor	6/149	221/18986	0.0271493	3.45944	3.27078	0.00804803	0.088745	0.074713	TNF/HSPA1A/HSPA1B/AKAP12/FOS/KLF2	6	BP	upreg	CM
GO:0009612	response to mechanical stimulus	6/149	222/18986	0.027027	3.44386	3.25749	0.00821945	0.090288	0.0760121	BTG2/PTGER4/TNF/BAG3/FOSL1/FOS	6	BP	upreg	CM
GO:0007612	learning	5/149	159/18986	0.0314465	4.00701	3.38637	0.00842401	0.0921819	0.0776065	BTG2/SLC1A1/FOSL1/FOS/EIF4A3	5	BP	upreg	CM
GO:0042060	wound healing	9/149	444/18986	0.0202703	2.58289	3.00163	0.0084805	0.0924471	0.0778298	CCN1/F3/PPARG/TNF/HSPB1/PAPSS2/CHMP1B/XBP1/GLA	9	BP	upreg	CM
GO:0015807	L-amino acid transport	4/149	102/18986	0.0392157	4.99697	3.59979	0.00854742	0.0924514	0.0778334	TNF/SLC7A2/SLC1A1/SLC25A18	4	BP	upreg	CM
GO:0030730	sequestering of triglyceride	2/149	18/18986	0.111111	14.1581	4.96719	0.0086198	0.0924514	0.0778334	PPARG/TNF	2	BP	upreg	CM
GO:0035973	aggrephagy	2/149	18/18986	0.111111	14.1581	4.96719	0.0086198	0.0924514	0.0778334	BAG3/HSPB8	2	BP	upreg	CM
GO:0090083	regulation of inclusion body assembly	2/149	18/18986	0.111111	14.1581	4.96719	0.0086198	0.0924514	0.0778334	HSPA1A/HSPA1B	2	BP	upreg	CM
GO:0016525	negative regulation of angiogenesis	5/149	160/18986	0.03125	3.98196	3.3688	0.00864212	0.0924514	0.0778334	PPARG/TNF/KLF4/KLF2/ADAMTS1	5	BP	upreg	CM
GO:1901342	regulation of vasculature development	8/149	369/18986	0.0216802	2.76255	3.04084	0.00878428	0.0936227	0.0788196	F3/PPARG/TNF/HSPB1/KLF4/KLF2/ADAMTS1/XBP1	8	BP	upreg	CM
GO:1990830	cellular response to leukemia inhibitory factor	4/149	103/18986	0.038835	4.94846	3.57358	0.00883966	0.0938641	0.0790228	CTH/MAT2A/KLF4/TEX14	4	BP	upreg	CM
GO:0070372	regulation of ERK1 and ERK2 cascade	7/149	296/18986	0.0236486	3.01338	3.10498	0.00894276	0.0946085	0.0796494	CCN1/ATF3/TNF/AKAP12/INHBA/CCR7/XBP1	7	BP	upreg	CM
GO:0002696	positive regulation of leukocyte activation	8/149	371/18986	0.0215633	2.74766	3.02347	0.00905801	0.0947676	0.0797834	PELI1/IL1RL1/TNF/IL15RA/HSPH1/PNP/CCR7/XBP1	8	BP	upreg	CM
GO:0050729	positive regulation of inflammatory response	5/149	162/18986	0.0308642	3.9328	3.33409	0.00909002	0.0947676	0.0797834	IL1RL1/PTGER4/TNF/C2CD4A/CCR7	5	BP	upreg	CM
GO:0050730	regulation of peptidyl-tyrosine phosphorylation	5/149	162/18986	0.0308642	3.9328	3.33409	0.00909002	0.0947676	0.0797834	ERRFI1/GFRA1/CSF3/SAMSN1/ITGB2	5	BP	upreg	CM
GO:2000181	negative regulation of blood vessel morphogenesis	5/149	162/18986	0.0308642	3.9328	3.33409	0.00909002	0.0947676	0.0797834	PPARG/TNF/KLF4/KLF2/ADAMTS1	5	BP	upreg	CM
GO:0036294	cellular response to decreased oxygen levels	5/149	163/18986	0.0306748	3.90868	3.31694	0.00931988	0.0967577	0.0814589	EPAS1/PPARG/INHBA/MYC/FOS	5	BP	upreg	CM
GO:1905477	positive regulation of protein localization to membrane	4/149	105/18986	0.0380952	4.8542	3.52216	0.00944357	0.0967577	0.0814589	TNFAIP6/TNF/ANXA13/ITGB2	4	BP	upreg	CM
GO:1990823	response to leukemia inhibitory factor	4/149	105/18986	0.0380952	4.8542	3.52216	0.00944357	0.0967577	0.0814589	CTH/MAT2A/KLF4/TEX14	4	BP	upreg	CM
GO:1901343	negative regulation of vasculature development	5/149	164/18986	0.0304878	3.88484	3.29992	0.00955371	0.0967577	0.0814589	PPARG/TNF/KLF4/KLF2/ADAMTS1	5	BP	upreg	CM
GO:0002524	hypersensitivity	2/149	19/18986	0.105263	13.4129	4.81442	0.00958465	0.0967577	0.0814589	FCGR2A/CCR7	2	BP	upreg	CM
GO:0010968	regulation of microtubule nucleation	2/149	19/18986	0.105263	13.4129	4.81442	0.00958465	0.0967577	0.0814589	HSPA1A/HSPA1B	2	BP	upreg	CM
GO:0020027	hemoglobin metabolic process	2/149	19/18986	0.105263	13.4129	4.81442	0.00958465	0.0967577	0.0814589	INHBA/KLF4	2	BP	upreg	CM
GO:0051132	NK T cell activation	2/149	19/18986	0.105263	13.4129	4.81442	0.00958465	0.0967577	0.0814589	CLEC2B/HSPH1	2	BP	upreg	CM
GO:0070431	nucleotide-binding oligomerization domain containing 2 signaling pathway	2/149	19/18986	0.105263	13.4129	4.81442	0.00958465	0.0967577	0.0814589	HSPA1A/HSPA1B	2	BP	upreg	CM
GO:0002686	negative regulation of leukocyte migration	3/149	57/18986	0.0526316	6.70646	3.83737	0.0101723	0.10126	0.0852496	TNFAIP6/PTGER4/DUSP1	3	BP	upreg	CM
GO:0006584	catecholamine metabolic process	3/149	57/18986	0.0526316	6.70646	3.83737	0.0101723	0.10126	0.0852496	EPAS1/SLC1A1/ITGB2	3	BP	upreg	CM
GO:0009712	catechol-containing compound metabolic process	3/149	57/18986	0.0526316	6.70646	3.83737	0.0101723	0.10126	0.0852496	EPAS1/SLC1A1/ITGB2	3	BP	upreg	CM
GO:0003333	amino acid transmembrane transport	4/149	108/18986	0.037037	4.71936	3.44743	0.0103988	0.10126	0.0852496	TNF/SLC7A2/SLC1A1/SLC25A18	4	BP	upreg	CM
GO:1990266	neutrophil migration	4/149	108/18986	0.037037	4.71936	3.44743	0.0103988	0.10126	0.0852496	TNFAIP6/TREM1/CCR7/ITGB2	4	BP	upreg	CM
GO:0007584	response to nutrient	5/149	168/18986	0.0297619	3.79235	3.23318	0.0105295	0.10126	0.0852496	MAT2A/PPARG/SPP1/PIM1/XBP1	5	BP	upreg	CM
GO:0002523	leukocyte migration involved in inflammatory response	2/149	20/18986	0.1	12.7423	4.67275	0.0105952	0.10126	0.0852496	TNF/ELANE	2	BP	upreg	CM
GO:0006525	arginine metabolic process	2/149	20/18986	0.1	12.7423	4.67275	0.0105952	0.10126	0.0852496	OAT/ARG2	2	BP	upreg	CM
GO:0015810	aspartate transmembrane transport	2/149	20/18986	0.1	12.7423	4.67275	0.0105952	0.10126	0.0852496	SLC1A1/SLC25A18	2	BP	upreg	CM
GO:0036499	PERK-mediated unfolded protein response	2/149	20/18986	0.1	12.7423	4.67275	0.0105952	0.10126	0.0852496	HSPA5/PPP1R15A	2	BP	upreg	CM
GO:0060716	labyrinthine layer blood vessel development	2/149	20/18986	0.1	12.7423	4.67275	0.0105952	0.10126	0.0852496	CCN1/JUNB	2	BP	upreg	CM
GO:0097154	GABAergic neuron differentiation	2/149	20/18986	0.1	12.7423	4.67275	0.0105952	0.10126	0.0852496	INHBA/ARX	2	BP	upreg	CM
GO:1902236	negative regulation of endoplasmic reticulum stress-induced intrinsic apoptotic signaling pathway	2/149	20/18986	0.1	12.7423	4.67275	0.0105952	0.10126	0.0852496	HSPA1A/XBP1	2	BP	upreg	CM
GO:0010563	negative regulation of phosphorus metabolic process	7/149	306/18986	0.0228758	2.9149	3.00339	0.0106086	0.10126	0.0852496	ERRFI1/DUSP1/TNF/INHBA/HSPB1/TRIB1/SAMSN1	7	BP	upreg	CM
GO:0045936	negative regulation of phosphate metabolic process	7/149	306/18986	0.0228758	2.9149	3.00339	0.0106086	0.10126	0.0852496	ERRFI1/DUSP1/TNF/INHBA/HSPB1/TRIB1/SAMSN1	7	BP	upreg	CM
GO:0071560	cellular response to transforming growth factor beta stimulus	7/149	306/18986	0.0228758	2.9149	3.00339	0.0106086	0.10126	0.0852496	JUN/PPARG/HSPA1A/HSPA5/FOS/ID1/XBP1	7	BP	upreg	CM
GO:0060986	endocrine hormone secretion	3/149	58/18986	0.0517241	6.59084	3.79255	0.0106664	0.10126	0.0852496	PPARG/SPP1/INHBA	3	BP	upreg	CM
GO:2001238	positive regulation of extrinsic apoptotic signaling pathway	3/149	58/18986	0.0517241	6.59084	3.79255	0.0106664	0.10126	0.0852496	ATF3/TNF/INHBA	3	BP	upreg	CM
GO:0051250	negative regulation of lymphocyte activation	5/149	169/18986	0.0295858	3.76991	3.21681	0.0107837	0.102036	0.0859024	ID2/PELI1/INHBA/ARG2/SAMSN1	5	BP	upreg	CM
GO:0002685	regulation of leukocyte migration	6/149	236/18986	0.0254237	3.23956	3.07901	0.0109035	0.10283	0.0865712	TNFAIP6/PTGER4/DUSP1/TNF/CCR7/ELANE	6	BP	upreg	CM
GO:0030522	intracellular receptor signaling pathway	8/149	384/18986	0.0208333	2.65464	2.91328	0.0109956	0.103359	0.0870163	ERRFI1/PELI1/PPARG/TNF/HSPA1A/HSPA1B/PIM1/KLF2	8	BP	upreg	CM
GO:0060135	maternal process involved in female pregnancy	3/149	59/18986	0.0508475	6.47913	3.74877	0.0111743	0.104695	0.0881413	SPP1/PRDM1/JUNB	3	BP	upreg	CM
GO:1903050	regulation of proteolysis involved in protein catabolic process	6/149	238/18986	0.0252101	3.21234	3.05461	0.0113322	0.105828	0.0890952	HSPA1A/HSPA1B/BAG2/TRIB1/ARHGAP5-AS1/XBP1	6	BP	upreg	CM
GO:0031647	regulation of protein stability	8/149	387/18986	0.0206718	2.63406	2.8885	0.0114833	0.106718	0.0898439	ATP1B3/HSPA1A/HSPA1B/PIM1/BAG2/BAG3/CRYAB/XBP1	8	BP	upreg	CM
GO:0036498	IRE1-mediated unfolded protein response	2/149	21/18986	0.0952381	12.1355	4.54084	0.0116507	0.106718	0.0898439	HSPA5/XBP1	2	BP	upreg	CM
GO:0048670	regulation of collateral sprouting	2/149	21/18986	0.0952381	12.1355	4.54084	0.0116507	0.106718	0.0898439	SPP1/IFRD1	2	BP	upreg	CM
GO:0072567	chemokine (C-X-C motif) ligand 2 production	2/149	21/18986	0.0952381	12.1355	4.54084	0.0116507	0.106718	0.0898439	TNF/KLF4	2	BP	upreg	CM
GO:1905038	regulation of membrane lipid metabolic process	2/149	21/18986	0.0952381	12.1355	4.54084	0.0116507	0.106718	0.0898439	CCN1/TNF	2	BP	upreg	CM
GO:2000341	regulation of chemokine (C-X-C motif) ligand 2 production	2/149	21/18986	0.0952381	12.1355	4.54084	0.0116507	0.106718	0.0898439	TNF/KLF4	2	BP	upreg	CM
GO:0038066	p38MAPK cascade	3/149	60/18986	0.05	6.37114	3.706	0.0116959	0.106791	0.0899055	DUSP1/HGF/GADD45B	3	BP	upreg	CM
GO:0030595	leukocyte chemotaxis	6/149	240/18986	0.025	3.18557	3.03046	0.0117726	0.107149	0.0902073	TNFAIP6/DUSP1/TREM1/CH25H/CCR7/ITGB2	6	BP	upreg	CM
GO:0071559	response to transforming growth factor beta	7/149	313/18986	0.0223642	2.84971	2.93469	0.0119021	0.107985	0.0909114	JUN/PPARG/HSPA1A/HSPA5/FOS/ID1/XBP1	7	BP	upreg	CM
GO:0045088	regulation of innate immune response	9/149	470/18986	0.0191489	2.44001	2.81147	0.0119955	0.108489	0.0913356	CFH/PELI1/PPARG/TNF/HSPA1A/HSPA1B/PIM1/COLEC10/FOSL1	9	BP	upreg	CM
GO:0050867	positive regulation of cell activation	8/149	391/18986	0.0204604	2.60712	2.85582	0.0121582	0.109586	0.0922587	PELI1/IL1RL1/TNF/IL15RA/HSPH1/PNP/CCR7/XBP1	8	BP	upreg	CM
GO:0001706	endoderm formation	3/149	61/18986	0.0491803	6.2667	3.66419	0.0122314	0.109586	0.0922587	DUSP1/INHBA/ITGB2	3	BP	upreg	CM
GO:0060612	adipose tissue development	3/149	61/18986	0.0491803	6.2667	3.66419	0.0122314	0.109586	0.0922587	ERRFI1/PPARG/XBP1	3	BP	upreg	CM
GO:0034612	response to tumor necrosis factor	6/149	243/18986	0.0246914	3.14624	2.99471	0.0124557	0.110667	0.0931688	TNF/HSPA1A/HSPA1B/AKAP12/FOS/KLF2	6	BP	upreg	CM
GO:0097529	myeloid leukocyte migration	6/149	243/18986	0.0246914	3.14624	2.99471	0.0124557	0.110667	0.0931688	TNFAIP6/PTGER4/DUSP1/TREM1/CCR7/ITGB2	6	BP	upreg	CM
GO:2001056	positive regulation of cysteine-type endopeptidase activity	4/149	114/18986	0.0350877	4.47098	3.30588	0.0124919	0.110667	0.0931688	F3/HSPE1/TNF/MYC	4	BP	upreg	CM
GO:0050863	regulation of T cell activation	8/149	393/18986	0.0203562	2.59385	2.83963	0.0125065	0.110667	0.0931688	PELI1/PRDM1/HSPH1/PNP/ARG2/CCR7/JUNB/XBP1	8	BP	upreg	CM
GO:0001666	response to hypoxia	7/149	317/18986	0.022082	2.81375	2.89628	0.0126906	0.111607	0.0939606	EPAS1/PPARG/TNF/INHBA/MYC/CRYAB/FOS	7	BP	upreg	CM
GO:0043491	phosphatidylinositol 3-kinase/protein kinase B signal transduction	7/149	317/18986	0.022082	2.81375	2.89628	0.0126906	0.111607	0.0939606	ERRFI1/ERFE/TNF/HGF/CSF3/CCR7/XBP1	7	BP	upreg	CM
GO:0060445	branching involved in salivary gland morphogenesis	2/149	22/18986	0.0909091	11.5839	4.41758	0.0127504	0.11179	0.0941145	TNF/HGF	2	BP	upreg	CM
GO:0007254	JNK cascade	5/149	177/18986	0.0282486	3.59951	3.09021	0.0129701	0.11337	0.0954441	PTGER4/TNF/TRIB1/CCR7/GADD45B	5	BP	upreg	CM
GO:0002444	myeloid leukocyte mediated immunity	4/149	116/18986	0.0344828	4.39389	3.26087	0.0132452	0.114543	0.096432	FCGR2A/TREM1/ELANE/ITGB2	4	BP	upreg	CM
GO:0031929	TOR signaling	5/149	178/18986	0.0280899	3.57929	3.07491	0.0132629	0.114543	0.096432	F3/PELI1/MAT2A/PIM1/XBP1	5	BP	upreg	CM
GO:0071453	cellular response to oxygen levels	5/149	178/18986	0.0280899	3.57929	3.07491	0.0132629	0.114543	0.096432	EPAS1/PPARG/INHBA/MYC/FOS	5	BP	upreg	CM
GO:0006919	activation of cysteine-type endopeptidase activity involved in apoptotic process	3/149	63/18986	0.047619	6.06775	3.5833	0.013344	0.114543	0.096432	F3/HSPE1/TNF	3	BP	upreg	CM
GO:0034113	heterotypic cell-cell adhesion	3/149	63/18986	0.047619	6.06775	3.5833	0.013344	0.114543	0.096432	TNF/KLF4/ITGB2	3	BP	upreg	CM
GO:0043462	regulation of ATP-dependent activity	3/149	63/18986	0.047619	6.06775	3.5833	0.013344	0.114543	0.096432	ATP1B3/DNAJB11/SLN	3	BP	upreg	CM
GO:1903320	regulation of protein modification by small protein conjugation or removal	6/149	248/18986	0.0241935	3.08281	2.93634	0.0136555	0.116867	0.0983884	EPAS1/PELI1/HSPA1A/HSPA1B/BAG2/HSPA5	6	BP	upreg	CM
GO:0002689	negative regulation of leukocyte chemotaxis	2/149	23/18986	0.0869565	11.0802	4.30204	0.0138935	0.118198	0.0995092	TNFAIP6/DUSP1	2	BP	upreg	CM
GO:0010888	negative regulation of lipid storage	2/149	23/18986	0.0869565	11.0802	4.30204	0.0138935	0.118198	0.0995092	PPARG/TNF	2	BP	upreg	CM
GO:0050673	epithelial cell proliferation	9/149	482/18986	0.0186722	2.37926	2.72791	0.0139438	0.118275	0.0995737	ERRFI1/F3/ID2/PPARG/TNF/HGF/MYC/XBP1/ARX	9	BP	upreg	CM
GO:1903034	regulation of response to wounding	5/149	181/18986	0.0276243	3.51997	3.02963	0.0141682	0.119823	0.100877	F3/SPP1/TNF/KLF4/XBP1	5	BP	upreg	CM
GO:0045444	fat cell differentiation	6/149	251/18986	0.0239044	3.04596	2.90202	0.014413	0.121536	0.102319	ID2/PPARG/TNF/PIM1/KLF4/XBP1	6	BP	upreg	CM
GO:0043534	blood vessel endothelial cell migration	5/149	182/18986	0.0274725	3.50063	3.01476	0.0144789	0.121733	0.102485	PPARG/TNF/HSPB1/KLF4/ID1	5	BP	upreg	CM
GO:1901873	regulation of post-translational protein modification	6/149	253/18986	0.0237154	3.02189	2.87942	0.014934	0.124549	0.104856	EPAS1/PELI1/HSPA1A/HSPA1B/BAG2/HSPA5	6	BP	upreg	CM
GO:0001779	natural killer cell differentiation	2/149	24/18986	0.0833333	10.6186	4.1934	0.0150793	0.124549	0.104856	PRDM1/IL15RA	2	BP	upreg	CM
GO:0002922	positive regulation of humoral immune response	2/149	24/18986	0.0833333	10.6186	4.1934	0.0150793	0.124549	0.104856	TNF/CCR7	2	BP	upreg	CM
GO:0034114	regulation of heterotypic cell-cell adhesion	2/149	24/18986	0.0833333	10.6186	4.1934	0.0150793	0.124549	0.104856	TNF/KLF4	2	BP	upreg	CM
GO:0072574	hepatocyte proliferation	2/149	24/18986	0.0833333	10.6186	4.1934	0.0150793	0.124549	0.104856	TNF/XBP1	2	BP	upreg	CM
GO:0072575	epithelial cell proliferation involved in liver morphogenesis	2/149	24/18986	0.0833333	10.6186	4.1934	0.0150793	0.124549	0.104856	TNF/XBP1	2	BP	upreg	CM
GO:0070059	intrinsic apoptotic signaling pathway in response to endoplasmic reticulum stress	3/149	66/18986	0.0454545	5.79195	3.46829	0.0151179	0.124549	0.104856	HSPA1A/PPP1R15A/XBP1	3	BP	upreg	CM
GO:0034341	response to type II interferon	4/149	121/18986	0.0330579	4.21232	3.15265	0.0152533	0.125304	0.105492	PPARG/TNF/PIM1/IFITM3	4	BP	upreg	CM
GO:0051092	positive regulation of NF-kappaB transcription factor activity	4/149	122/18986	0.0327869	4.1778	3.13171	0.0156766	0.127837	0.107624	CTH/TNF/HSPA1A/HSPA1B	4	BP	upreg	CM
GO:0006956	complement activation	3/149	67/18986	0.0447761	5.7055	3.43152	0.0157374	0.127837	0.107624	CFH/CFI/COLEC10	3	BP	upreg	CM
GO:0032715	negative regulation of interleukin-6 production	3/149	67/18986	0.0447761	5.7055	3.43152	0.0157374	0.127837	0.107624	TNF/HGF/KLF2	3	BP	upreg	CM
GO:0042326	negative regulation of phosphorylation	6/149	256/18986	0.0234375	2.98647	2.84594	0.0157399	0.127837	0.107624	ERRFI1/DUSP1/INHBA/HSPB1/TRIB1/SAMSN1	6	BP	upreg	CM
GO:0043405	regulation of MAP kinase activity	4/149	123/18986	0.0325203	4.14383	3.11099	0.0161073	0.13023	0.109639	DUSP1/TNF/TRIB1/ELANE	4	BP	upreg	CM
GO:0003085	negative regulation of systemic arterial blood pressure	2/149	25/18986	0.08	10.1938	4.09099	0.0163071	0.13023	0.109639	TNF/TAC1	2	BP	upreg	CM
GO:0014856	skeletal muscle cell proliferation	2/149	25/18986	0.08	10.1938	4.09099	0.0163071	0.13023	0.109639	HGF/FOS	2	BP	upreg	CM
GO:0046597	negative regulation of viral entry into host cell	2/149	25/18986	0.08	10.1938	4.09099	0.0163071	0.13023	0.109639	CH25H/IFITM3	2	BP	upreg	CM
GO:0046697	decidualization	2/149	25/18986	0.08	10.1938	4.09099	0.0163071	0.13023	0.109639	SPP1/JUNB	2	BP	upreg	CM
GO:0061042	vascular wound healing	2/149	25/18986	0.08	10.1938	4.09099	0.0163071	0.13023	0.109639	TNF/XBP1	2	BP	upreg	CM
GO:0008202	steroid metabolic process	7/149	334/18986	0.0209581	2.67054	2.73943	0.0164656	0.130317	0.109712	ERRFI1/SPP1/TNF/INHBA/IDI1/CH25H/SDR42E2	7	BP	upreg	CM
GO:0000956	nuclear-transcribed mRNA catabolic process	4/149	124/18986	0.0322581	4.11041	3.09049	0.0165453	0.130317	0.109712	PNRC2/BTG2/PNRC1/EIF4A3	4	BP	upreg	CM
GO:0030510	regulation of BMP signaling pathway	4/149	124/18986	0.0322581	4.11041	3.09049	0.0165453	0.130317	0.109712	CCN1/TNFAIP6/PPARG/CHRDL2	4	BP	upreg	CM
GO:0032609	type II interferon production	4/149	124/18986	0.0322581	4.11041	3.09049	0.0165453	0.130317	0.109712	IL1RL1/TNF/INHBA/CCR7	4	BP	upreg	CM
GO:0032649	regulation of type II interferon production	4/149	124/18986	0.0322581	4.11041	3.09049	0.0165453	0.130317	0.109712	IL1RL1/TNF/INHBA/CCR7	4	BP	upreg	CM
GO:0022409	positive regulation of cell-cell adhesion	7/149	336/18986	0.0208333	2.65464	2.72162	0.0169569	0.133102	0.112056	TNF/HSPH1/PNP/CCR7/ELANE/ITGB2/XBP1	7	BP	upreg	CM
GO:0040013	negative regulation of locomotion	8/149	416/18986	0.0192308	2.45044	2.66031	0.0170563	0.133102	0.112056	TNFAIP6/PPARG/PTGER4/DUSP1/TNF/TRIB1/KLF4/ELANE	8	BP	upreg	CM
GO:0008217	regulation of blood pressure	5/149	190/18986	0.0263158	3.35323	2.89936	0.017131	0.133102	0.112056	ID2/PPARG/TNF/TAC1/ACSM3	5	BP	upreg	CM
GO:0009267	cellular response to starvation	5/149	190/18986	0.0263158	3.35323	2.89936	0.017131	0.133102	0.112056	ATF3/HSPA5/GABARAPL1/FOS/XBP1	5	BP	upreg	CM
GO:0051348	negative regulation of transferase activity	5/149	190/18986	0.0263158	3.35323	2.89936	0.017131	0.133102	0.112056	ERRFI1/DUSP1/BAG2/HSPB1/TRIB1	5	BP	upreg	CM
GO:0071900	regulation of protein serine/threonine kinase activity	6/149	262/18986	0.0229008	2.91808	2.78042	0.0174412	0.134018	0.112828	DUSP1/TNF/PIM1/TRIB1/ELANE/SERTAD1	6	BP	upreg	CM
GO:0005980	glycogen catabolic process	2/149	26/18986	0.0769231	9.80176	3.9942	0.0175762	0.134018	0.112828	STBD1/GABARAPL1	2	BP	upreg	CM
GO:0009065	glutamine family amino acid catabolic process	2/149	26/18986	0.0769231	9.80176	3.9942	0.0175762	0.134018	0.112828	OAT/ARG2	2	BP	upreg	CM
GO:0034138	toll-like receptor 3 signaling pathway	2/149	26/18986	0.0769231	9.80176	3.9942	0.0175762	0.134018	0.112828	PELI1/TNF	2	BP	upreg	CM
GO:0060561	apoptotic process involved in morphogenesis	2/149	26/18986	0.0769231	9.80176	3.9942	0.0175762	0.134018	0.112828	CCN1/CRYAB	2	BP	upreg	CM
GO:0072576	liver morphogenesis	2/149	26/18986	0.0769231	9.80176	3.9942	0.0175762	0.134018	0.112828	TNF/XBP1	2	BP	upreg	CM
GO:1901658	glycosyl compound catabolic process	2/149	26/18986	0.0769231	9.80176	3.9942	0.0175762	0.134018	0.112828	PNP/GLA	2	BP	upreg	CM
GO:0048662	negative regulation of smooth muscle cell proliferation	3/149	70/18986	0.0428571	5.46098	3.3255	0.0176806	0.134348	0.113105	PPARG/TRIB1/KLF4	3	BP	upreg	CM
GO:0048872	homeostasis of number of cells	7/149	339/18986	0.020649	2.63115	2.69514	0.0177131	0.134348	0.113105	ID2/EPAS1/HSPA1A/HSPA1B/INHBA/CCR7/KLF2	7	BP	upreg	CM
GO:0002832	negative regulation of response to biotic stimulus	4/149	127/18986	0.0314961	4.01332	3.03026	0.0179041	0.135438	0.114023	PPARG/PIM1/TRIB1/ARG2	4	BP	upreg	CM
GO:0062208	positive regulation of pattern recognition receptor signaling pathway	3/149	71/18986	0.0422535	5.38406	3.29151	0.0183568	0.138497	0.116598	PELI1/HSPA1A/HSPA1B	3	BP	upreg	CM
GO:0000070	mitotic sister chromatid segregation	5/149	194/18986	0.0257732	3.28409	2.84394	0.0185704	0.139375	0.117338	DUSP1/HSPA1A/HSPA1B/TEX14/CHMP1B	5	BP	upreg	CM
GO:1905475	regulation of protein localization to membrane	5/149	194/18986	0.0257732	3.28409	2.84394	0.0185704	0.139375	0.117338	TNFAIP6/TNF/ANXA13/SLC1A1/ITGB2	5	BP	upreg	CM
GO:0006612	protein targeting to membrane	4/149	129/18986	0.0310078	3.9511	2.99112	0.0188475	0.13991	0.117789	SLC1A1/HSPA5/SNAP25-AS1/ITGB2	4	BP	upreg	CM
GO:0071621	granulocyte chemotaxis	4/149	129/18986	0.0310078	3.9511	2.99112	0.0188475	0.13991	0.117789	TNFAIP6/TREM1/CCR7/ITGB2	4	BP	upreg	CM
GO:0009251	glucan catabolic process	2/149	27/18986	0.0740741	9.43873	3.90251	0.0188857	0.13991	0.117789	STBD1/GABARAPL1	2	BP	upreg	CM
GO:0043043	peptide biosynthetic process	2/149	27/18986	0.0740741	9.43873	3.90251	0.0188857	0.13991	0.117789	SLC1A1/ELANE	2	BP	upreg	CM
GO:1904754	positive regulation of vascular associated smooth muscle cell migration	2/149	27/18986	0.0740741	9.43873	3.90251	0.0188857	0.13991	0.117789	ADAMTS1/XBP1	2	BP	upreg	CM
GO:0050918	positive chemotaxis	3/149	72/18986	0.0416667	5.30928	3.25816	0.0190471	0.140743	0.118489	F3/HGF/COLEC10	3	BP	upreg	CM
GO:0051235	maintenance of location	7/149	345/18986	0.0202899	2.58539	2.64304	0.0192965	0.142021	0.119565	PPARG/TNF/HSPA5/SRGN/POLR2M/CCR7/GLA	7	BP	upreg	CM
GO:0002695	negative regulation of leukocyte activation	5/149	196/18986	0.0255102	3.25058	2.81677	0.0193192	0.142021	0.119565	ID2/PELI1/INHBA/ARG2/SAMSN1	5	BP	upreg	CM
GO:0015800	acidic amino acid transport	3/149	73/18986	0.0410959	5.23655	3.22542	0.0197517	0.144092	0.121309	TNF/SLC1A1/SLC25A18	3	BP	upreg	CM
GO:0042698	ovulation cycle	3/149	73/18986	0.0410959	5.23655	3.22542	0.0197517	0.144092	0.121309	TNFAIP6/INHBA/ADAMTS1	3	BP	upreg	CM
GO:0050766	positive regulation of phagocytosis	3/149	73/18986	0.0410959	5.23655	3.22542	0.0197517	0.144092	0.121309	FCGR2A/COLEC10/IL15RA	3	BP	upreg	CM
GO:0032434	regulation of proteasomal ubiquitin-dependent protein catabolic process	4/149	131/18986	0.0305344	3.89077	2.95277	0.0198211	0.144231	0.121426	HSPA1A/HSPA1B/TRIB1/ARHGAP5-AS1	4	BP	upreg	CM
GO:0015740	C4-dicarboxylate transport	2/149	28/18986	0.0714286	9.10163	3.81547	0.0202351	0.145639	0.122612	SLC1A1/SLC25A18	2	BP	upreg	CM
GO:0035929	steroid hormone secretion	2/149	28/18986	0.0714286	9.10163	3.81547	0.0202351	0.145639	0.122612	SPP1/INHBA	2	BP	upreg	CM
GO:1902894	negative regulation of miRNA transcription	2/149	28/18986	0.0714286	9.10163	3.81547	0.0202351	0.145639	0.122612	PPARG/TNF	2	BP	upreg	CM
GO:0030512	negative regulation of transforming growth factor beta receptor signaling pathway	4/149	132/18986	0.030303	3.8613	2.93387	0.0203194	0.145639	0.122612	PPARG/HSPA1A/HSPA5/XBP1	4	BP	upreg	CM
GO:0045834	positive regulation of lipid metabolic process	4/149	132/18986	0.030303	3.8613	2.93387	0.0203194	0.145639	0.122612	CCN1/PPARG/TNF/XBP1	4	BP	upreg	CM
GO:0098773	skin epidermis development	4/149	132/18986	0.030303	3.8613	2.93387	0.0203194	0.145639	0.122612	GRHL1/TNF/INHBA/KLF4	4	BP	upreg	CM
GO:0030514	negative regulation of BMP signaling pathway	3/149	74/18986	0.0405405	5.16579	3.19328	0.0204706	0.146357	0.123216	TNFAIP6/PPARG/CHRDL2	3	BP	upreg	CM
GO:0046632	alpha-beta T cell differentiation	4/149	133/18986	0.0300752	3.83227	2.91516	0.0208253	0.148513	0.125031	PTGER4/PRDM1/PNP/JUNB	4	BP	upreg	CM
GO:0031334	positive regulation of protein-containing complex assembly	5/149	200/18986	0.025	3.18557	2.76347	0.0208757	0.148513	0.125031	TNF/HSPA1A/HSPA1B/CSF3/CCR7	5	BP	upreg	CM
GO:0043254	regulation of protein-containing complex assembly	8/149	433/18986	0.0184758	2.35423	2.53526	0.0211133	0.149831	0.126141	PTGER4/TNF/HSPA1A/HSPA1B/HSPA5/CRYAB/CSF3/CCR7	8	BP	upreg	CM
GO:0045123	cellular extravasation	3/149	75/18986	0.04	5.09691	3.16171	0.0212037	0.150101	0.126368	PTGER4/TNF/ELANE	3	BP	upreg	CM
GO:0000272	polysaccharide catabolic process	2/149	29/18986	0.0689655	8.78778	3.73268	0.0216236	0.151577	0.12761	STBD1/GABARAPL1	2	BP	upreg	CM
GO:0034695	response to prostaglandin E	2/149	29/18986	0.0689655	8.78778	3.73268	0.0216236	0.151577	0.12761	PTGER4/CCR7	2	BP	upreg	CM
GO:0035872	nucleotide-binding domain, leucine rich repeat containing receptor signaling pathway	2/149	29/18986	0.0689655	8.78778	3.73268	0.0216236	0.151577	0.12761	HSPA1A/HSPA1B	2	BP	upreg	CM
GO:0090594	inflammatory response to wounding	2/149	29/18986	0.0689655	8.78778	3.73268	0.0216236	0.151577	0.12761	PPARG/TNF	2	BP	upreg	CM
GO:0007369	gastrulation	5/149	202/18986	0.0247525	3.15403	2.73732	0.0216838	0.151628	0.127653	DUSP1/INHBA/KLF4/ETS2/ITGB2	5	BP	upreg	CM
GO:0090307	mitotic spindle assembly	3/149	76/18986	0.0394737	5.02985	3.13071	0.0219511	0.153124	0.128913	HSPA1A/HSPA1B/CHMP1B	3	BP	upreg	CM
GO:0018108	peptidyl-tyrosine phosphorylation	5/149	204/18986	0.0245098	3.12311	2.7115	0.0225121	0.156231	0.131529	ERRFI1/GFRA1/CSF3/SAMSN1/ITGB2	5	BP	upreg	CM
GO:0051701	biological process involved in interaction with host	5/149	204/18986	0.0245098	3.12311	2.7115	0.0225121	0.156231	0.131529	HSPA1A/HSPA1B/CH25H/IFITM3/CHMP1B	5	BP	upreg	CM
GO:0002221	pattern recognition receptor signaling pathway	6/149	278/18986	0.0215827	2.75013	2.6144	0.0225876	0.156231	0.131529	PELI1/TNF/HSPA1A/HSPA1B/COLEC10/FOSL1	6	BP	upreg	CM
GO:0045669	positive regulation of osteoblast differentiation	3/149	77/18986	0.038961	4.96453	3.10024	0.0227128	0.156231	0.131529	CCN1/HGF/JUND	3	BP	upreg	CM
GO:0010950	positive regulation of endopeptidase activity	4/149	137/18986	0.0291971	3.72037	2.84209	0.0229263	0.156231	0.131529	F3/HSPE1/TNF/MYC	4	BP	upreg	CM
GO:0051592	response to calcium ion	4/149	137/18986	0.0291971	3.72037	2.84209	0.0229263	0.156231	0.131529	KCNMB4/FOS/JUNB/JUND	4	BP	upreg	CM
GO:0031396	regulation of protein ubiquitination	5/149	205/18986	0.0243902	3.10787	2.6987	0.0229338	0.156231	0.131529	PELI1/HSPA1A/HSPA1B/BAG2/HSPA5	5	BP	upreg	CM
GO:0045672	positive regulation of osteoclast differentiation	2/149	30/18986	0.0666667	8.49485	3.65379	0.0230505	0.156231	0.131529	TNF/FOS	2	BP	upreg	CM
GO:0048668	collateral sprouting	2/149	30/18986	0.0666667	8.49485	3.65379	0.0230505	0.156231	0.131529	SPP1/IFRD1	2	BP	upreg	CM
GO:0062149	detection of stimulus involved in sensory perception of pain	2/149	30/18986	0.0666667	8.49485	3.65379	0.0230505	0.156231	0.131529	TNF/TAC1	2	BP	upreg	CM
GO:1900017	positive regulation of cytokine production involved in inflammatory response	2/149	30/18986	0.0666667	8.49485	3.65379	0.0230505	0.156231	0.131529	IL17B/TNF	2	BP	upreg	CM
GO:2000629	negative regulation of miRNA metabolic process	2/149	30/18986	0.0666667	8.49485	3.65379	0.0230505	0.156231	0.131529	PPARG/TNF	2	BP	upreg	CM
GO:0051896	regulation of phosphatidylinositol 3-kinase/protein kinase B signal transduction	6/149	280/18986	0.0214286	2.73049	2.59448	0.0232956	0.15752	0.132614	ERFE/TNF/HGF/CSF3/CCR7/XBP1	6	BP	upreg	CM
GO:0018212	peptidyl-tyrosine modification	5/149	206/18986	0.0242718	3.09279	2.68598	0.0233606	0.157588	0.132671	ERRFI1/GFRA1/CSF3/SAMSN1/ITGB2	5	BP	upreg	CM
GO:0071277	cellular response to calcium ion	3/149	78/18986	0.0384615	4.90088	3.07029	0.0234887	0.15808	0.133085	FOS/JUNB/JUND	3	BP	upreg	CM
GO:0050777	negative regulation of immune response	5/149	207/18986	0.0241546	3.07785	2.67334	0.0237926	0.15975	0.134491	IL1RL1/PPARG/PIM1/ARG2/SAMSN1	5	BP	upreg	CM
GO:0140014	mitotic nuclear division	6/149	282/18986	0.0212766	2.71112	2.57473	0.0240184	0.160549	0.135163	DUSP1/TNF/HSPA1A/HSPA1B/TEX14/CHMP1B	6	BP	upreg	CM
GO:0030183	B cell differentiation	4/149	139/18986	0.028777	3.66684	2.80657	0.0240235	0.160549	0.135163	ID2/INHBA/KLF6/XBP1	4	BP	upreg	CM
GO:0008209	androgen metabolic process	2/149	31/18986	0.0645161	8.22083	3.57848	0.0245152	0.162697	0.136972	SPP1/INHBA	2	BP	upreg	CM
GO:0034250	positive regulation of amide metabolic process	2/149	31/18986	0.0645161	8.22083	3.57848	0.0245152	0.162697	0.136972	CCN1/TNF	2	BP	upreg	CM
GO:1903901	negative regulation of viral life cycle	2/149	31/18986	0.0645161	8.22083	3.57848	0.0245152	0.162697	0.136972	CH25H/IFITM3	2	BP	upreg	CM
GO:0042113	B cell activation	6/149	284/18986	0.0211268	2.69203	2.55515	0.0247562	0.163917	0.137999	ID2/PELI1/INHBA/KLF6/SAMSN1/XBP1	6	BP	upreg	CM
GO:0032436	positive regulation of proteasomal ubiquitin-dependent protein catabolic process	3/149	80/18986	0.0375	4.77836	3.0119	0.0250834	0.164563	0.138543	HSPA1A/HSPA1B/TRIB1	3	BP	upreg	CM
GO:0035914	skeletal muscle cell differentiation	3/149	80/18986	0.0375	4.77836	3.0119	0.0250834	0.164563	0.138543	BTG2/ATF3/FOS	3	BP	upreg	CM
GO:0046637	regulation of alpha-beta T cell differentiation	3/149	80/18986	0.0375	4.77836	3.0119	0.0250834	0.164563	0.138543	PRDM1/PNP/JUNB	3	BP	upreg	CM
GO:0060390	regulation of SMAD protein signal transduction	3/149	80/18986	0.0375	4.77836	3.0119	0.0250834	0.164563	0.138543	PPARG/INHBA/XBP1	3	BP	upreg	CM
GO:0031397	negative regulation of protein ubiquitination	3/149	81/18986	0.037037	4.71936	2.98343	0.0259022	0.168758	0.142074	HSPA1A/HSPA1B/BAG2	3	BP	upreg	CM
GO:0043537	negative regulation of blood vessel endothelial cell migration	3/149	81/18986	0.037037	4.71936	2.98343	0.0259022	0.168758	0.142074	PPARG/TNF/KLF4	3	BP	upreg	CM
GO:0048679	regulation of axon regeneration	2/149	32/18986	0.0625	7.96393	3.50648	0.026017	0.168758	0.142074	SPP1/KLF4	2	BP	upreg	CM
GO:0090313	regulation of protein targeting to membrane	2/149	32/18986	0.0625	7.96393	3.50648	0.026017	0.168758	0.142074	SLC1A1/ITGB2	2	BP	upreg	CM
GO:1902042	negative regulation of extrinsic apoptotic signaling pathway via death domain receptors	2/149	32/18986	0.0625	7.96393	3.50648	0.026017	0.168758	0.142074	HGF/ITPRIP	2	BP	upreg	CM
GO:0001101	response to acid chemical	4/149	144/18986	0.0277778	3.53952	2.72059	0.026904	0.173725	0.146256	MAT2A/TNF/KLF2/XBP1	4	BP	upreg	CM
GO:0043281	regulation of cysteine-type endopeptidase activity involved in apoptotic process	4/149	144/18986	0.0277778	3.53952	2.72059	0.026904	0.173725	0.146256	F3/HSPE1/TNF/MYC	4	BP	upreg	CM
GO:0001934	positive regulation of protein phosphorylation	8/149	455/18986	0.0175824	2.2404	2.38183	0.0273259	0.175341	0.147617	CCN1/TNF/PIM1/GFRA1/CSF3/CCR7/ELANE/XBP1	8	BP	upreg	CM
GO:0031116	positive regulation of microtubule polymerization	2/149	33/18986	0.0606061	7.7226	3.43754	0.0275552	0.175341	0.147617	HSPA1A/HSPA1B	2	BP	upreg	CM
GO:0048566	embryonic digestive tract development	2/149	33/18986	0.0606061	7.7226	3.43754	0.0275552	0.175341	0.147617	ID2/TNF	2	BP	upreg	CM
GO:0060795	cell fate commitment involved in formation of primary germ layer	2/149	33/18986	0.0606061	7.7226	3.43754	0.0275552	0.175341	0.147617	KLF4/ETS2	2	BP	upreg	CM
GO:0099170	postsynaptic modulation of chemical synaptic transmission	2/149	33/18986	0.0606061	7.7226	3.43754	0.0275552	0.175341	0.147617	SLC1A1/EIF4A3	2	BP	upreg	CM
GO:0070972	protein localization to endoplasmic reticulum	3/149	83/18986	0.0361446	4.60564	2.92785	0.0275824	0.175341	0.147617	HSPA5/PPP1R15A/SNAP25-AS1	3	BP	upreg	CM
GO:2000142	regulation of DNA-templated transcription initiation	3/149	83/18986	0.0361446	4.60564	2.92785	0.0275824	0.175341	0.147617	JUN/MYC/FOSL1	3	BP	upreg	CM
GO:0010506	regulation of autophagy	7/149	373/18986	0.0187668	2.39131	2.41359	0.0280085	0.177656	0.149566	ERFE/HSPB1/HGF/DEPP1/BAG3/HSPB8/XBP1	7	BP	upreg	CM
GO:0042176	regulation of protein catabolic process	7/149	374/18986	0.0187166	2.38492	2.40578	0.0283619	0.1795	0.151118	TNF/HSPA1A/HSPA1B/BAG2/TRIB1/ARHGAP5-AS1/XBP1	7	BP	upreg	CM
GO:0001889	liver development	4/149	147/18986	0.0272109	3.46729	2.6708	0.0287275	0.179599	0.151202	ERRFI1/TNF/HGF/XBP1	4	BP	upreg	CM
GO:0010952	positive regulation of peptidase activity	4/149	147/18986	0.0272109	3.46729	2.6708	0.0287275	0.179599	0.151202	F3/HSPE1/TNF/MYC	4	BP	upreg	CM
GO:0007435	salivary gland morphogenesis	2/149	34/18986	0.0588235	7.49546	3.37143	0.0291292	0.179599	0.151202	TNF/HGF	2	BP	upreg	CM
GO:0045671	negative regulation of osteoclast differentiation	2/149	34/18986	0.0588235	7.49546	3.37143	0.0291292	0.179599	0.151202	TNFAIP6/ERFE	2	BP	upreg	CM
GO:0050901	leukocyte tethering or rolling	2/149	34/18986	0.0588235	7.49546	3.37143	0.0291292	0.179599	0.151202	TNF/ELANE	2	BP	upreg	CM
GO:0051450	myoblast proliferation	2/149	34/18986	0.0588235	7.49546	3.37143	0.0291292	0.179599	0.151202	HGF/FOS	2	BP	upreg	CM
GO:0051873	killing by host of symbiont cells	2/149	34/18986	0.0588235	7.49546	3.37143	0.0291292	0.179599	0.151202	TREM1/ELANE	2	BP	upreg	CM
GO:0060055	angiogenesis involved in wound healing	2/149	34/18986	0.0588235	7.49546	3.37143	0.0291292	0.179599	0.151202	TNF/XBP1	2	BP	upreg	CM
GO:0061436	establishment of skin barrier	2/149	34/18986	0.0588235	7.49546	3.37143	0.0291292	0.179599	0.151202	GRHL1/KLF4	2	BP	upreg	CM
GO:0070570	regulation of neuron projection regeneration	2/149	34/18986	0.0588235	7.49546	3.37143	0.0291292	0.179599	0.151202	SPP1/KLF4	2	BP	upreg	CM
GO:0090022	regulation of neutrophil chemotaxis	2/149	34/18986	0.0588235	7.49546	3.37143	0.0291292	0.179599	0.151202	TNFAIP6/CCR7	2	BP	upreg	CM
GO:1902235	regulation of endoplasmic reticulum stress-induced intrinsic apoptotic signaling pathway	2/149	34/18986	0.0588235	7.49546	3.37143	0.0291292	0.179599	0.151202	HSPA1A/XBP1	2	BP	upreg	CM
GO:0014855	striated muscle cell proliferation	3/149	85/18986	0.0352941	4.49728	2.87402	0.0293194	0.179993	0.151533	PIM1/HGF/FOS	3	BP	upreg	CM
GO:0034614	cellular response to reactive oxygen species	4/149	148/18986	0.027027	3.44386	2.6545	0.0293513	0.179993	0.151533	HGF/KLF4/FOS/KLF2	4	BP	upreg	CM
GO:0050866	negative regulation of cell activation	5/149	219/18986	0.0228311	2.9092	2.52736	0.0293814	0.179993	0.151533	ID2/PELI1/INHBA/ARG2/SAMSN1	5	BP	upreg	CM
GO:0002758	innate immune response-activating signaling pathway	6/149	297/18986	0.020202	2.5742	2.43185	0.0299229	0.182919	0.153997	PELI1/TNF/HSPA1A/HSPA1B/COLEC10/FOSL1	6	BP	upreg	CM
GO:0006446	regulation of translational initiation	3/149	86/18986	0.0348837	4.44498	2.84772	0.0302092	0.183885	0.15481	TNF/HSPB1/PPP1R15A	3	BP	upreg	CM
GO:0007193	adenylate cyclase-inhibiting G protein-coupled receptor signaling pathway	3/149	86/18986	0.0348837	4.44498	2.84772	0.0302092	0.183885	0.15481	PTGER4/AKAP12/S1PR3	3	BP	upreg	CM
GO:0061008	hepaticobiliary system development	4/149	150/18986	0.0266667	3.39794	2.6223	0.0306228	0.185367	0.156058	ERRFI1/TNF/HGF/XBP1	4	BP	upreg	CM
GO:0021772	olfactory bulb development	2/149	35/18986	0.0571429	7.2813	3.30796	0.0307383	0.185367	0.156058	ID2/ARX	2	BP	upreg	CM
GO:0048333	mesodermal cell differentiation	2/149	35/18986	0.0571429	7.2813	3.30796	0.0307383	0.185367	0.156058	INHBA/KLF4	2	BP	upreg	CM
GO:0048384	retinoic acid receptor signaling pathway	2/149	35/18986	0.0571429	7.2813	3.30796	0.0307383	0.185367	0.156058	PPARG/KLF2	2	BP	upreg	CM
GO:0048511	rhythmic process	6/149	299/18986	0.0200669	2.55698	2.41347	0.030776	0.185367	0.156058	ID2/TNFAIP6/PPARG/TNF/INHBA/ADAMTS1	6	BP	upreg	CM
GO:0090287	regulation of cellular response to growth factor stimulus	7/149	381/18986	0.0183727	2.3411	2.35181	0.0309208	0.185849	0.156463	CCN1/TNFAIP6/PPARG/HSPA1A/HSPA5/CHRDL2/XBP1	7	BP	upreg	CM
GO:0007492	endoderm development	3/149	87/18986	0.0344828	4.39389	2.82183	0.0311131	0.186614	0.157107	DUSP1/INHBA/ITGB2	3	BP	upreg	CM
GO:0044772	mitotic cell cycle phase transition	8/149	467/18986	0.0171306	2.18283	2.30179	0.0312034	0.186765	0.157234	ID2/DUSP1/INHBA/MYC/CKS2/KLF4/TEX14/ADAMTS1	8	BP	upreg	CM
GO:0030336	negative regulation of cell migration	7/149	383/18986	0.0182768	2.32888	2.3366	0.0316796	0.18922	0.159301	TNFAIP6/PPARG/PTGER4/DUSP1/TNF/TRIB1/KLF4	7	BP	upreg	CM
GO:0003407	neural retina development	3/149	88/18986	0.0340909	4.34396	2.79632	0.0320312	0.190526	0.160401	PRDM1/SLC1A1/FOS	3	BP	upreg	CM
GO:0032370	positive regulation of lipid transport	3/149	88/18986	0.0340909	4.34396	2.79632	0.0320312	0.190526	0.160401	ERFE/PPARG/SPP1	3	BP	upreg	CM
GO:0030224	monocyte differentiation	2/149	36/18986	0.0555556	7.07905	3.24694	0.0323819	0.191026	0.160822	PPARG/MYC	2	BP	upreg	CM
GO:0033687	osteoblast proliferation	2/149	36/18986	0.0555556	7.07905	3.24694	0.0323819	0.191026	0.160822	CCN1/JUNB	2	BP	upreg	CM
GO:0050732	negative regulation of peptidyl-tyrosine phosphorylation	2/149	36/18986	0.0555556	7.07905	3.24694	0.0323819	0.191026	0.160822	ERRFI1/SAMSN1	2	BP	upreg	CM
GO:0071353	cellular response to interleukin-4	2/149	36/18986	0.0555556	7.07905	3.24694	0.0323819	0.191026	0.160822	HSPA5/XBP1	2	BP	upreg	CM
GO:2000377	regulation of reactive oxygen species metabolic process	4/149	153/18986	0.0261438	3.33132	2.57501	0.0325905	0.191862	0.161526	TNF/CRYAB/ARG2/ITGB2	4	BP	upreg	CM
GO:0031329	regulation of cellular catabolic process	8/149	472/18986	0.0169492	2.15971	2.26915	0.0329255	0.193437	0.162852	ERFE/TNF/HSPB1/HGF/DEPP1/BAG3/HSPB8/XBP1	8	BP	upreg	CM
GO:0043122	regulation of canonical NF-kappaB signal transduction	6/149	305/18986	0.0196721	2.50668	2.35919	0.0334307	0.196003	0.165012	CTH/PELI1/TNF/HSPB1/KLF4/CCR7	6	BP	upreg	CM
GO:0006469	negative regulation of protein kinase activity	4/149	155/18986	0.0258065	3.28833	2.54414	0.0339426	0.197668	0.166414	ERRFI1/DUSP1/HSPB1/TRIB1	4	BP	upreg	CM
GO:0007431	salivary gland development	2/149	37/18986	0.0540541	6.88772	3.18821	0.0340593	0.197668	0.166414	TNF/HGF	2	BP	upreg	CM
GO:0021988	olfactory lobe development	2/149	37/18986	0.0540541	6.88772	3.18821	0.0340593	0.197668	0.166414	ID2/ARX	2	BP	upreg	CM
GO:0032717	negative regulation of interleukin-8 production	2/149	37/18986	0.0540541	6.88772	3.18821	0.0340593	0.197668	0.166414	KLF4/ELANE	2	BP	upreg	CM
GO:0034694	response to prostaglandin	2/149	37/18986	0.0540541	6.88772	3.18821	0.0340593	0.197668	0.166414	PTGER4/CCR7	2	BP	upreg	CM
GO:0031960	response to corticosteroid	4/149	156/18986	0.025641	3.26725	2.52889	0.0346307	0.199771	0.168184	TNF/INHBA/FOSL1/FOS	4	BP	upreg	CM
GO:0043535	regulation of blood vessel endothelial cell migration	4/149	156/18986	0.025641	3.26725	2.52889	0.0346307	0.199771	0.168184	PPARG/TNF/HSPB1/KLF4	4	BP	upreg	CM
GO:1905039	carboxylic acid transmembrane transport	4/149	156/18986	0.025641	3.26725	2.52889	0.0346307	0.199771	0.168184	TNF/SLC7A2/SLC1A1/SLC25A18	4	BP	upreg	CM
GO:0010469	regulation of signaling receptor activity	3/149	91/18986	0.032967	4.20075	2.72202	0.0348698	0.200344	0.168667	ERRFI1/PPARG/TNF	3	BP	upreg	CM
GO:0071230	cellular response to amino acid stimulus	3/149	91/18986	0.032967	4.20075	2.72202	0.0348698	0.200344	0.168667	MAT2A/TNF/XBP1	3	BP	upreg	CM
GO:0042594	response to starvation	5/149	230/18986	0.0217391	2.77006	2.40201	0.0351786	0.201714	0.16982	ATF3/HSPA5/GABARAPL1/FOS/XBP1	5	BP	upreg	CM
GO:0042327	positive regulation of phosphorylation	8/149	479/18986	0.0167015	2.12815	2.22412	0.035444	0.20283	0.17076	CCN1/TNF/PIM1/GFRA1/CSF3/CCR7/ELANE/XBP1	8	BP	upreg	CM
GO:0031112	positive regulation of microtubule polymerization or depolymerization	2/149	38/18986	0.0526316	6.70646	3.13163	0.0357699	0.203477	0.171304	HSPA1A/HSPA1B	2	BP	upreg	CM
GO:0043243	positive regulation of protein-containing complex disassembly	2/149	38/18986	0.0526316	6.70646	3.13163	0.0357699	0.203477	0.171304	TNF/SLN	2	BP	upreg	CM
GO:0071404	cellular response to low-density lipoprotein particle stimulus	2/149	38/18986	0.0526316	6.70646	3.13163	0.0357699	0.203477	0.171304	PPARG/ITGB2	2	BP	upreg	CM
GO:0043433	negative regulation of DNA-binding transcription factor activity	4/149	158/18986	0.0253165	3.22589	2.49875	0.0360313	0.204558	0.172214	ID2/PIM1/TRIB1/ID1	4	BP	upreg	CM
GO:0046718	symbiont entry into host cell	4/149	159/18986	0.0251572	3.20561	2.48387	0.0367438	0.207462	0.174659	HSPA1A/HSPA1B/CH25H/IFITM3	4	BP	upreg	CM
GO:1903825	organic acid transmembrane transport	4/149	159/18986	0.0251572	3.20561	2.48387	0.0367438	0.207462	0.174659	TNF/SLC7A2/SLC1A1/SLC25A18	4	BP	upreg	CM
GO:0014910	regulation of smooth muscle cell migration	3/149	93/18986	0.0322581	4.11041	2.67425	0.0368322	0.207462	0.174659	TRIB1/ADAMTS1/XBP1	3	BP	upreg	CM
GO:0050886	endocrine process	3/149	93/18986	0.0322581	4.11041	2.67425	0.0368322	0.207462	0.174659	PPARG/SPP1/INHBA	3	BP	upreg	CM
GO:0032768	regulation of monooxygenase activity	2/149	39/18986	0.0512821	6.5345	3.07704	0.0375132	0.209242	0.176157	TNF/GLA	2	BP	upreg	CM
GO:0033280	response to vitamin D	2/149	39/18986	0.0512821	6.5345	3.07704	0.0375132	0.209242	0.176157	SPP1/PIM1	2	BP	upreg	CM
GO:0055094	response to lipoprotein particle	2/149	39/18986	0.0512821	6.5345	3.07704	0.0375132	0.209242	0.176157	PPARG/ITGB2	2	BP	upreg	CM
GO:0060392	negative regulation of SMAD protein signal transduction	2/149	39/18986	0.0512821	6.5345	3.07704	0.0375132	0.209242	0.176157	PPARG/XBP1	2	BP	upreg	CM
GO:0070670	response to interleukin-4	2/149	39/18986	0.0512821	6.5345	3.07704	0.0375132	0.209242	0.176157	HSPA5/XBP1	2	BP	upreg	CM
GO:2000146	negative regulation of cell motility	7/149	398/18986	0.0175879	2.2411	2.22549	0.0377717	0.209809	0.176635	TNFAIP6/PPARG/PTGER4/DUSP1/TNF/TRIB1/KLF4	7	BP	upreg	CM
GO:0046889	positive regulation of lipid biosynthetic process	3/149	94/18986	0.0319149	4.06669	2.65086	0.0378343	0.209809	0.176635	CCN1/TNF/XBP1	3	BP	upreg	CM
GO:1903321	negative regulation of protein modification by small protein conjugation or removal	3/149	94/18986	0.0319149	4.06669	2.65086	0.0378343	0.209809	0.176635	HSPA1A/HSPA1B/BAG2	3	BP	upreg	CM
GO:0000819	sister chromatid segregation	5/149	235/18986	0.0212766	2.71112	2.34745	0.0380318	0.210497	0.177214	DUSP1/HSPA1A/HSPA1B/TEX14/CHMP1B	5	BP	upreg	CM
GO:0001933	negative regulation of protein phosphorylation	5/149	236/18986	0.0211864	2.69964	2.3367	0.038619	0.213335	0.179603	ERRFI1/DUSP1/HSPB1/TRIB1/SAMSN1	5	BP	upreg	CM
GO:0002218	activation of innate immune response	6/149	317/18986	0.0189274	2.41179	2.2544	0.0391761	0.214962	0.180973	PELI1/TNF/HSPA1A/HSPA1B/COLEC10/FOSL1	6	BP	upreg	CM
GO:0006730	one-carbon metabolic process	2/149	40/18986	0.05	6.37114	3.02434	0.0392884	0.214962	0.180973	MAT2A/CA5A	2	BP	upreg	CM
GO:0032781	positive regulation of ATP-dependent activity	2/149	40/18986	0.05	6.37114	3.02434	0.0392884	0.214962	0.180973	ATP1B3/DNAJB11	2	BP	upreg	CM
GO:0032814	regulation of natural killer cell activation	2/149	40/18986	0.05	6.37114	3.02434	0.0392884	0.214962	0.180973	PRDM1/IL15RA	2	BP	upreg	CM
GO:0045616	regulation of keratinocyte differentiation	2/149	40/18986	0.05	6.37114	3.02434	0.0392884	0.214962	0.180973	ERRFI1/GRHL1	2	BP	upreg	CM
GO:0016049	cell growth	8/149	490/18986	0.0163265	2.08037	2.15489	0.0396609	0.216586	0.182341	SPP1/HSPA1A/HSPA1B/INHBA/IFRD1/CRYAB/FLRT3/XBP1	8	BP	upreg	CM
GO:0001701	in utero embryonic development	7/149	403/18986	0.0173697	2.2133	2.18955	0.0399628	0.21782	0.18338	CCN1/EPAS1/PRDM1/KLF4/FOSL1/JUNB/KLF2	7	BP	upreg	CM
GO:0006909	phagocytosis	5/149	239/18986	0.0209205	2.66575	2.30481	0.0404139	0.219519	0.18481	FCGR2A/COLEC10/IL15RA/ELANE/ITGB2	5	BP	upreg	CM
GO:0044409	symbiont entry into host	4/149	164/18986	0.0243902	3.10787	2.41116	0.0404277	0.219519	0.18481	HSPA1A/HSPA1B/CH25H/IFITM3	4	BP	upreg	CM
GO:0030217	T cell differentiation	6/149	320/18986	0.01875	2.38918	2.22895	0.0407048	0.220223	0.185403	PTGER4/PRDM1/PNP/CCR7/JUNB/XBP1	6	BP	upreg	CM
GO:0019915	lipid storage	3/149	97/18986	0.0309278	3.94091	2.58259	0.0409237	0.220223	0.185403	PPARG/TNF/GLA	3	BP	upreg	CM
GO:0046330	positive regulation of JNK cascade	3/149	97/18986	0.0309278	3.94091	2.58259	0.0409237	0.220223	0.185403	TNF/CCR7/GADD45B	3	BP	upreg	CM
GO:0042307	positive regulation of protein import into nucleus	2/149	41/18986	0.0487805	6.21575	2.9734	0.041095	0.220223	0.185403	BAG3/XBP1	2	BP	upreg	CM
GO:0042417	dopamine metabolic process	2/149	41/18986	0.0487805	6.21575	2.9734	0.041095	0.220223	0.185403	SLC1A1/ITGB2	2	BP	upreg	CM
GO:0044060	regulation of endocrine process	2/149	41/18986	0.0487805	6.21575	2.9734	0.041095	0.220223	0.185403	SPP1/INHBA	2	BP	upreg	CM
GO:0097242	amyloid-beta clearance	2/149	41/18986	0.0487805	6.21575	2.9734	0.041095	0.220223	0.185403	TNF/ITGB2	2	BP	upreg	CM
GO:0006865	amino acid transport	4/149	165/18986	0.0242424	3.08904	2.39695	0.0411888	0.220314	0.185479	TNF/SLC7A2/SLC1A1/SLC25A18	4	BP	upreg	CM
GO:0033673	negative regulation of kinase activity	4/149	166/18986	0.0240964	3.07043	2.38285	0.0419581	0.223302	0.187994	ERRFI1/DUSP1/HSPB1/TRIB1	4	BP	upreg	CM
GO:0071346	cellular response to type II interferon	3/149	98/18986	0.0306122	3.9007	2.56044	0.041981	0.223302	0.187994	PPARG/TNF/PIM1	3	BP	upreg	CM
GO:1901874	negative regulation of post-translational protein modification	3/149	98/18986	0.0306122	3.9007	2.56044	0.041981	0.223302	0.187994	HSPA1A/HSPA1B/BAG2	3	BP	upreg	CM
GO:0001558	regulation of cell growth	7/149	408/18986	0.0171569	2.18618	2.15413	0.0422358	0.224013	0.188593	SPP1/HSPA1A/HSPA1B/INHBA/IFRD1/CRYAB/XBP1	7	BP	upreg	CM
GO:0019058	viral life cycle	6/149	323/18986	0.0185759	2.36699	2.20378	0.0422709	0.224013	0.188593	TNF/HSPA1A/HSPA1B/CH25H/IFITM3/CHMP1B	6	BP	upreg	CM
GO:2000116	regulation of cysteine-type endopeptidase activity	4/149	167/18986	0.0239521	3.05204	2.36886	0.0427355	0.224827	0.189279	F3/HSPE1/TNF/MYC	4	BP	upreg	CM
GO:0045860	positive regulation of protein kinase activity	5/149	243/18986	0.0205761	2.62187	2.26304	0.0428849	0.224827	0.189279	CCN1/TNF/PIM1/CCR7/ELANE	5	BP	upreg	CM
GO:0002691	regulation of cellular extravasation	2/149	42/18986	0.047619	6.06775	2.92413	0.0429324	0.224827	0.189279	PTGER4/ELANE	2	BP	upreg	CM
GO:0030851	granulocyte differentiation	2/149	42/18986	0.047619	6.06775	2.92413	0.0429324	0.224827	0.189279	TRIB1/CSF3	2	BP	upreg	CM
GO:1902742	apoptotic process involved in development	2/149	42/18986	0.047619	6.06775	2.92413	0.0429324	0.224827	0.189279	CCN1/CRYAB	2	BP	upreg	CM
GO:0006576	biogenic amine metabolic process	3/149	99/18986	0.030303	3.8613	2.53858	0.043052	0.224827	0.189279	EPAS1/SLC1A1/ITGB2	3	BP	upreg	CM
GO:0048525	negative regulation of viral process	3/149	99/18986	0.030303	3.8613	2.53858	0.043052	0.224827	0.189279	TNF/CH25H/IFITM3	3	BP	upreg	CM
GO:1903432	regulation of TORC1 signaling	3/149	99/18986	0.030303	3.8613	2.53858	0.043052	0.224827	0.189279	PELI1/MAT2A/PIM1	3	BP	upreg	CM
GO:0045785	positive regulation of cell adhesion	8/149	499/18986	0.0160321	2.04285	2.09958	0.043352	0.225982	0.190251	CCN1/TNF/HSPH1/PNP/CCR7/ELANE/ITGB2/XBP1	8	BP	upreg	CM
GO:0010596	negative regulation of endothelial cell migration	3/149	100/18986	0.03	3.82268	2.51701	0.0441367	0.229239	0.192993	PPARG/TNF/KLF4	3	BP	upreg	CM
GO:0014909	smooth muscle cell migration	3/149	100/18986	0.03	3.82268	2.51701	0.0441367	0.229239	0.192993	TRIB1/ADAMTS1/XBP1	3	BP	upreg	CM
GO:0007249	canonical NF-kappaB signal transduction	6/149	327/18986	0.0183486	2.33803	2.17065	0.0444177	0.229451	0.193172	CTH/PELI1/TNF/HSPB1/KLF4/CCR7	6	BP	upreg	CM
GO:0097193	intrinsic apoptotic signaling pathway	6/149	327/18986	0.0183486	2.33803	2.17065	0.0444177	0.229451	0.193172	TNF/HSPA1A/HSPB1/MYC/PPP1R15A/XBP1	6	BP	upreg	CM
GO:1904951	positive regulation of establishment of protein localization	6/149	327/18986	0.0183486	2.33803	2.17065	0.0444177	0.229451	0.193172	PPARG/TNF/ANXA13/BAG3/ITGB2/XBP1	6	BP	upreg	CM
GO:0001709	cell fate determination	2/149	43/18986	0.0465116	5.92664	2.87643	0.0448001	0.23101	0.194484	IFRD1/KLF4	2	BP	upreg	CM
GO:0007204	positive regulation of cytosolic calcium ion concentration	4/149	170/18986	0.0235294	2.99818	2.3275	0.0451164	0.231808	0.195155	PTGER4/TAC1/S1PR3/CCR7	4	BP	upreg	CM
GO:0007292	female gamete generation	4/149	170/18986	0.0235294	2.99818	2.3275	0.0451164	0.231808	0.195155	TNFAIP6/INHBA/FOSL1/ADAMTS1	4	BP	upreg	CM
GO:0051100	negative regulation of binding	3/149	101/18986	0.029703	3.78484	2.49571	0.0452349	0.232001	0.195318	JUN/BAG2/SLN	3	BP	upreg	CM
GO:0050890	cognition	6/149	329/18986	0.0182371	2.32382	2.15426	0.0455162	0.233027	0.196182	BTG2/TNF/SLC1A1/FOSL1/FOS/EIF4A3	6	BP	upreg	CM
GO:2000058	regulation of ubiquitin-dependent protein catabolic process	4/149	171/18986	0.0233918	2.98065	2.31391	0.0459263	0.234707	0.197596	HSPA1A/HSPA1B/TRIB1/ARHGAP5-AS1	4	BP	upreg	CM
GO:0052548	regulation of endopeptidase activity	5/149	248/18986	0.0201613	2.56901	2.21198	0.0460994	0.235172	0.197988	F3/HSPE1/TNF/MYC/SERPINA3	5	BP	upreg	CM
GO:0050764	regulation of phagocytosis	3/149	102/18986	0.0294118	3.74773	2.47468	0.0463466	0.236014	0.198697	FCGR2A/COLEC10/IL15RA	3	BP	upreg	CM
GO:0042119	neutrophil activation	2/149	44/18986	0.0454545	5.79195	2.83021	0.0466973	0.236777	0.199339	TNF/ITGB2	2	BP	upreg	CM
GO:0030509	BMP signaling pathway	4/149	172/18986	0.0232558	2.96332	2.30042	0.0467442	0.236777	0.199339	CCN1/TNFAIP6/PPARG/CHRDL2	4	BP	upreg	CM
GO:0030856	regulation of epithelial cell differentiation	4/149	172/18986	0.0232558	2.96332	2.30042	0.0467442	0.236777	0.199339	ERRFI1/GRHL1/TNF/S1PR3	4	BP	upreg	CM
GO:0008585	female gonad development	3/149	103/18986	0.0291262	3.71134	2.45392	0.0474718	0.240038	0.202085	TNFAIP6/INHBA/ADAMTS1	3	BP	upreg	CM
GO:0032689	negative regulation of type II interferon production	2/149	45/18986	0.0444444	5.66324	2.78538	0.0486237	0.24414	0.205538	IL1RL1/INHBA	2	BP	upreg	CM
GO:0051602	response to electrical stimulus	2/149	45/18986	0.0444444	5.66324	2.78538	0.0486237	0.24414	0.205538	BTG2/AKAP12	2	BP	upreg	CM
GO:0060428	lung epithelium development	2/149	45/18986	0.0444444	5.66324	2.78538	0.0486237	0.24414	0.205538	ERRFI1/KLF2	2	BP	upreg	CM
GO:0071402	cellular response to lipoprotein particle stimulus	2/149	45/18986	0.0444444	5.66324	2.78538	0.0486237	0.24414	0.205538	PPARG/ITGB2	2	BP	upreg	CM
GO:0051251	positive regulation of lymphocyte activation	6/149	336/18986	0.0178571	2.27541	2.09784	0.0494943	0.248077	0.208853	PELI1/IL15RA/HSPH1/PNP/CCR7/XBP1	6	BP	upreg	CM
GO:0002027	regulation of heart rate	3/149	105/18986	0.0285714	3.64065	2.41316	0.0497624	0.248552	0.209252	EPAS1/TNF/SLC1A1	3	BP	upreg	CM
GO:2000060	positive regulation of ubiquitin-dependent protein catabolic process	3/149	105/18986	0.0285714	3.64065	2.41316	0.0497624	0.248552	0.209252	HSPA1A/HSPA1B/TRIB1	3	BP	upreg	CM
GO:0051082	unfolded protein binding	9/145	122/18737	0.0737705	9.53267	8.35012	4.5048e-07	0.000162623	0.000142731	DNAJB4/HSPA6/HSPE1/DNAJB11/HSPA1A/HSPA1B/HSPB1/HSPA5/CRYAB	9	MF	upreg	CM
GO:0044183	protein folding chaperone	7/145	75/18737	0.0933333	12.0606	8.47597	1.83822e-06	0.000331799	0.000291213	HSPA6/HSPE1/HSPA1A/HSPA1B/HSPB1/HSPA5/HSPH1	7	MF	upreg	CM
GO:0140662	ATP-dependent protein folding chaperone	5/145	40/18737	0.125	16.1526	8.47208	1.37022e-05	0.00164883	0.00144715	HSPA6/HSPA1A/HSPA1B/HSPA5/HSPH1	5	MF	upreg	CM
GO:0001228	DNA-binding transcription activator activity, RNA polymerase II-specific	14/145	480/18737	0.0291667	3.76894	5.42723	2.21259e-05	0.00187338	0.00164423	JUN/ATF3/GRHL1/EPAS1/PPARG/CSRNP1/MYC/KLF4/KLF6/FOSL1/FOS/JUNB/JUND/ARX	14	MF	upreg	CM
GO:0001216	DNA-binding transcription activator activity	14/145	487/18737	0.0287474	3.71476	5.36074	2.59471e-05	0.00187338	0.00164423	JUN/ATF3/GRHL1/EPAS1/PPARG/CSRNP1/MYC/KLF4/KLF6/FOSL1/FOS/JUNB/JUND/ARX	14	MF	upreg	CM
GO:0060590	ATPase regulator activity	5/145	49/18737	0.102041	13.1858	7.54275	3.75488e-05	0.00225919	0.00198284	DNAJB4/ATP1B3/BAG2/BAG3/HSPH1	5	MF	upreg	CM
GO:0061629	RNA polymerase II-specific DNA-binding transcription factor binding	11/145	349/18737	0.0315186	4.07286	5.11738	8.76936e-05	0.00452248	0.00396929	JUN/ID2/EPAS1/PPARG/HSPB1/TRIB1/KLF4/GABARAPL1/FOS/ETS2/XBP1	11	MF	upreg	CM
GO:0140297	DNA-binding transcription factor binding	13/145	488/18737	0.0266393	3.44235	4.8279	0.00010985	0.00495698	0.00435064	JUN/ID2/GRHL1/EPAS1/PPARG/HSPB1/TRIB1/MYC/KLF4/GABARAPL1/FOS/ETS2/XBP1	13	MF	upreg	CM
GO:0000774	adenyl-nucleotide exchange factor activity	3/145	15/18737	0.2	25.8441	8.50066	0.000192926	0.00773849	0.00679191	BAG2/BAG3/HSPH1	3	MF	upreg	CM
GO:0051787	misfolded protein binding	3/145	16/18737	0.1875	24.2289	8.20886	0.000236104	0.00852334	0.00748076	DNAJB11/HSPA1A/HSPA5	3	MF	upreg	CM
GO:0001221	transcription coregulator binding	6/145	117/18737	0.0512821	6.6267	5.39158	0.000299255	0.00982101	0.0086197	EPAS1/PPARG/MYC/KLF4/FOS/JUND	6	MF	upreg	CM
GO:0031072	heat shock protein binding	6/145	131/18737	0.0458015	5.9185	4.98886	0.000547443	0.0164689	0.0144544	HSPA6/HSPA1A/HSPA1B/BAG2/HSPA5/ITGB2	6	MF	upreg	CM
GO:0004896	cytokine receptor activity	5/145	97/18737	0.0515464	6.66086	4.93634	0.000942946	0.0261849	0.0229819	F3/IL1RL1/IL15RA/GFRA1/CCR7	5	MF	upreg	CM
GO:0070412	R-SMAD binding	3/145	26/18737	0.115385	14.9101	6.26797	0.0010358	0.026709	0.0234419	JUN/PPARG/FOS	3	MF	upreg	CM
GO:0001227	DNA-binding transcription repressor activity, RNA polymerase II-specific	8/145	268/18737	0.0298507	3.85733	4.1607	0.00116402	0.0280142	0.0245874	JUN/ATF3/MXD1/PPARG/PRDM1/MYC/ETS2/ARX	8	MF	upreg	CM
GO:0140375	immune receptor activity	6/145	154/18737	0.038961	5.03457	4.43976	0.00127231	0.0287065	0.0251951	F3/FCGR2A/IL1RL1/IL15RA/GFRA1/CCR7	6	MF	upreg	CM
GO:0001217	DNA-binding transcription repressor activity	8/145	278/18737	0.028777	3.71858	4.03292	0.00146873	0.031189	0.0273739	JUN/ATF3/MXD1/PPARG/PRDM1/MYC/ETS2/ARX	8	MF	upreg	CM
GO:0005178	integrin binding	6/145	161/18737	0.0372671	4.81568	4.29406	0.00159664	0.0320215	0.0281046	CCN1/SPP1/ESM1/S1PR3/GFRA1/ITGB2	6	MF	upreg	CM
GO:1990841	promoter-specific chromatin binding	4/145	69/18737	0.057971	7.49105	4.77035	0.00201441	0.0377121	0.0330991	PRDM1/KLF4/FOSL1/FOS	4	MF	upreg	CM
GO:0140416	transcription regulator inhibitor activity	3/145	33/18737	0.0909091	11.7473	5.45695	0.00208931	0.0377121	0.0330991	ID2/HSPA1A/ID1	3	MF	upreg	CM
GO:0031625	ubiquitin protein ligase binding	8/145	301/18737	0.0265781	3.43444	3.76017	0.00241145	0.0386523	0.0339243	JUN/HSPA1A/HSPA1B/BAG2/TRIB1/HSPA5/GABARAPL1/XBP1	8	MF	upreg	CM
GO:0004955	prostaglandin receptor activity	2/145	10/18737	0.2	25.8441	6.93984	0.00256968	0.0386523	0.0339243	PPARG/PTGER4	2	MF	upreg	CM
GO:0008330	protein tyrosine/threonine phosphatase activity	2/145	10/18737	0.2	25.8441	6.93984	0.00256968	0.0386523	0.0339243	DUSP1/DUSP8	2	MF	upreg	CM
GO:0033550	MAP kinase tyrosine phosphatase activity	2/145	10/18737	0.2	25.8441	6.93984	0.00256968	0.0386523	0.0339243	DUSP1/DUSP8	2	MF	upreg	CM
GO:0001851	complement component C3b binding	2/145	11/18737	0.181818	23.4947	6.59042	0.00312482	0.0433869	0.0380797	CFH/ITGB2	2	MF	upreg	CM
GO:0004954	prostanoid receptor activity	2/145	11/18737	0.181818	23.4947	6.59042	0.00312482	0.0433869	0.0380797	PPARG/PTGER4	2	MF	upreg	CM
GO:0044389	ubiquitin-like protein ligase binding	8/145	321/18737	0.0249221	3.22045	3.54369	0.0035692	0.0477215	0.0418842	JUN/HSPA1A/HSPA1B/BAG2/TRIB1/HSPA5/GABARAPL1/XBP1	8	MF	upreg	CM
GO:0035497	cAMP response element binding	2/145	12/18737	0.166667	21.5368	6.28451	0.0037308	0.0481007	0.042217	JUN/CREB5	2	MF	upreg	CM
GO:0051087	protein-folding chaperone binding	5/145	134/18737	0.0373134	4.82167	3.92079	0.00389141	0.0484413	0.0425159	DNAJB4/HSPE1/BAG2/HSPA5/BAG3	5	MF	upreg	CM
GO:0017017	MAP kinase tyrosine/serine/threonine phosphatase activity	2/145	13/18737	0.153846	19.8801	6.01362	0.00438683	0.0527882	0.0463311	DUSP1/DUSP8	2	MF	upreg	CM
GO:0005313	L-glutamate transmembrane transporter activity	2/145	14/18737	0.142857	18.4601	5.77142	0.0050921	0.0592983	0.0520448	SLC1A1/SLC25A18	2	MF	upreg	CM
GO:0004953	icosanoid receptor activity	2/145	15/18737	0.133333	17.2294	5.55306	0.00584581	0.0620688	0.0544765	PPARG/PTGER4	2	MF	upreg	CM
GO:0015556	C4-dicarboxylate transmembrane transporter activity	2/145	15/18737	0.133333	17.2294	5.55306	0.00584581	0.0620688	0.0544765	SLC1A1/SLC25A18	2	MF	upreg	CM
GO:0140776	protein-containing complex destabilizing activity	2/145	15/18737	0.133333	17.2294	5.55306	0.00584581	0.0620688	0.0544765	HSPA1A/HSPA1B	2	MF	upreg	CM
GO:0015172	acidic amino acid transmembrane transporter activity	2/145	18/18737	0.111111	14.3579	5.00715	0.0083899	0.0841321	0.0738409	SLC1A1/SLC25A18	2	MF	upreg	CM
GO:0033549	MAP kinase phosphatase activity	2/145	18/18737	0.111111	14.3579	5.00715	0.0083899	0.0841321	0.0738409	DUSP1/DUSP8	2	MF	upreg	CM
GO:0001846	opsonin binding	2/145	21/18737	0.0952381	12.3067	4.57825	0.0113424	0.110665	0.0971287	CFH/ITGB2	2	MF	upreg	CM
GO:0015179	L-amino acid transmembrane transporter activity	3/145	66/18737	0.0454545	5.87367	3.5027	0.0145625	0.138343	0.121421	SLC7A2/SLC1A1/SLC25A18	3	MF	upreg	CM
GO:0030145	manganese ion binding	3/145	68/18737	0.0441176	5.70091	3.42954	0.015772	0.145992	0.128134	PIM1/IDI1/ARG2	3	MF	upreg	CM
GO:0001848	complement binding	2/145	26/18737	0.0769231	9.94005	4.02845	0.0171173	0.154483	0.135587	CFH/ITGB2	2	MF	upreg	CM
GO:0001671	ATPase activator activity	2/145	27/18737	0.0740741	9.5719	3.93624	0.018394	0.161957	0.142146	DNAJB4/ATP1B3	2	MF	upreg	CM
GO:0008138	protein tyrosine/serine/threonine phosphatase activity	2/145	28/18737	0.0714286	9.23005	3.84871	0.0197096	0.169409	0.148687	DUSP1/DUSP8	2	MF	upreg	CM
GO:0005416	amino acid:monoatomic cation symporter activity	2/145	29/18737	0.0689655	8.91177	3.76546	0.0210636	0.171847	0.150826	SLC1A1/SLC25A18	2	MF	upreg	CM
GO:0002020	protease binding	4/145	136/18737	0.0294118	3.80061	2.89476	0.0213892	0.171847	0.150826	F3/TNF/ELANE/XBP1	4	MF	upreg	CM
GO:0003714	transcription corepressor activity	5/145	205/18737	0.0243902	3.15172	2.73566	0.0217324	0.171847	0.150826	BTG2/ID2/HSPA1A/ELANE/ID1	5	MF	upreg	CM
GO:0004860	protein kinase inhibitor activity	3/145	77/18737	0.038961	5.03457	3.1329	0.0218973	0.171847	0.150826	HSPB1/TRIB1/ITPRIP	3	MF	upreg	CM
GO:0046332	SMAD binding	3/145	79/18737	0.0379747	4.90711	3.07324	0.023411	0.179626	0.157654	JUN/PPARG/FOS	3	MF	upreg	CM
GO:0005310	dicarboxylic acid transmembrane transporter activity	2/145	31/18737	0.0645161	8.33682	3.61042	0.0238837	0.179626	0.157654	SLC1A1/SLC25A18	2	MF	upreg	CM
GO:0019955	cytokine binding	4/145	143/18737	0.027972	3.61456	2.77166	0.0251513	0.185298	0.162632	IL1RL1/CHRDL2/CCR7/ELANE	4	MF	upreg	CM
GO:0019210	kinase inhibitor activity	3/145	82/18737	0.0365854	4.72759	2.98742	0.0257854	0.186171	0.163398	HSPB1/TRIB1/ITPRIP	3	MF	upreg	CM
GO:0055106	ubiquitin-protein transferase regulator activity	2/145	34/18737	0.0588235	7.60122	3.40226	0.0283849	0.200921	0.176344	TRIB1/ARHGAP5-AS1	2	MF	upreg	CM
GO:0005125	cytokine activity	5/145	238/18737	0.0210084	2.71472	2.35108	0.037831	0.262635	0.230509	SPP1/IL17B/TNF/INHBA/CSF3	5	MF	upreg	CM
GO:0004857	enzyme inhibitor activity	7/145	410/18737	0.0170732	2.20621	2.18086	0.0405034	0.265107	0.232679	RARRES1/HSPB1/TRIB1/ITPRIP/SLN/ARHGAP5-AS1/SERPINA3	7	MF	upreg	CM
GO:0004725	protein tyrosine phosphatase activity	3/145	98/18737	0.0306122	3.95574	2.59076	0.0405402	0.265107	0.232679	DUSP1/PTP4A1/DUSP8	3	MF	upreg	CM
GO:0019887	protein kinase regulator activity	5/145	243/18737	0.0205761	2.65886	2.29857	0.0407702	0.265107	0.232679	PIM1/HSPB1/TRIB1/CKS2/ITPRIP	5	MF	upreg	CM
GO:0015171	amino acid transmembrane transporter activity	3/145	99/18737	0.030303	3.91578	2.56881	0.0415777	0.265107	0.232679	SLC7A2/SLC1A1/SLC25A18	3	MF	upreg	CM
GO:0042056	chemoattractant activity	2/145	42/18737	0.047619	6.15337	2.95265	0.0418591	0.265107	0.232679	HGF/COLEC10	2	MF	upreg	CM
GO:0005539	glycosaminoglycan binding	5/145	246/18737	0.0203252	2.62644	2.26769	0.0425986	0.265139	0.232707	CCN1/CFH/TNFAIP6/ELANE/ADAMTS1	5	MF	upreg	CM
GO:0001046	core promoter sequence-specific DNA binding	2/145	43/18737	0.0465116	6.01026	2.90471	0.0436831	0.267281	0.234587	MYC/FOS	2	MF	upreg	CM
GO:0008201	heparin binding	4/145	176/18737	0.0227273	2.93683	2.27986	0.0480164	0.288899	0.25356	CCN1/CFH/ELANE/ADAMTS1	4	MF	upreg	CM
GO:0090575	RNA polymerase II transcription regulator complex	9/151	257/19960	0.0350195	4.62906	5.11236	0.00015234	0.0322827	0.0291272	JUN/ATF3/PPARG/MYC/FOSL1/FOS/JUNB/JUND/XBP1	9	CC	upreg	CM
GO:0101031	protein folding chaperone complex	4/151	42/19960	0.0952381	12.5891	6.56414	0.000281702	0.0322827	0.0291272	DNAJB11/BAG2/BAG3/HSPB8	4	CC	upreg	CM
GO:1905286	serine-type peptidase complex	3/151	21/19960	0.142857	18.8836	7.1588	0.000510756	0.0322827	0.0291272	F3/CFH/COLEC10	3	CC	upreg	CM
GO:0101002	ficolin-1-rich granule	7/151	185/19960	0.0378378	5.00161	4.77407	0.000527064	0.0322827	0.0291272	HSPA6/TNFAIP6/STBD1/HSPA1A/HSPA1B/PNP/ITGB2	7	CC	upreg	CM
GO:0009897	external side of plasma membrane	10/151	407/19960	0.02457	3.2478	4.00013	0.00108897	0.0533597	0.0481441	F3/FCGR2A/IL1RL1/TNF/COLEC10/SLC1A1/GFRA1/CLEC2B/CCR7/ITGB2	10	CC	upreg	CM
GO:0016235	aggresome	3/151	35/19960	0.0857143	11.3302	5.34035	0.00232618	0.0746453	0.0673491	HSPA1A/HSPA1B/BAG3	3	CC	upreg	CM
GO:0008180	COP9 signalosome	3/151	36/19960	0.0833333	11.0155	5.25122	0.00252369	0.0746453	0.0673491	HSPA6/HSPA1A/HSPA5	3	CC	upreg	CM
GO:1904813	ficolin-1-rich granule lumen	5/151	124/19960	0.0403226	5.33006	4.22283	0.00253699	0.0746453	0.0673491	HSPA6/TNFAIP6/HSPA1A/HSPA1B/PNP	5	CC	upreg	CM
GO:0034663	endoplasmic reticulum chaperone complex	2/151	11/19960	0.181818	24.0337	6.67154	0.00299003	0.0746453	0.0673491	DNAJB11/HSPA5	2	CC	upreg	CM
GO:0017053	transcription repressor complex	4/151	79/19960	0.0506329	6.69293	4.42647	0.00304675	0.0746453	0.0673491	MXD1/MYC/ELANE/JUND	4	CC	upreg	CM
GO:0072562	blood microparticle	5/151	144/19960	0.0347222	4.58977	3.77456	0.0048073	0.105466	0.0951569	HSPA6/CFH/HSPA1A/HSPA1B/SERPINA3	5	CC	upreg	CM
GO:0031674	I band	5/151	148/19960	0.0337838	4.46572	3.69477	0.00539301	0.105466	0.0951569	DNAJB4/HSPB1/BAG3/CRYAB/POLR2M	5	CC	upreg	CM
GO:0090571	RNA polymerase II transcription repressor complex	2/151	15/19960	0.133333	17.6247	5.62354	0.00559613	0.105466	0.0951569	MXD1/MYC	2	CC	upreg	CM
GO:0016528	sarcoplasm	4/151	97/19960	0.0412371	5.45095	3.83656	0.00632929	0.110763	0.0999362	IFRD1/SLN/RASD1/SERTAD1	4	CC	upreg	CM
GO:1905370	serine-type endopeptidase complex	2/151	19/19960	0.105263	13.9143	4.91699	0.00893515	0.145941	0.131676	CFH/COLEC10	2	CC	upreg	CM
GO:0034774	secretory granule lumen	7/151	324/19960	0.0216049	2.85586	2.94047	0.0117951	0.158778	0.143258	HSPA6/HGF/SRGN/PNP/SERPINA3/ELANE/GLA	7	CC	upreg	CM
GO:0000791	euchromatin	3/151	63/19960	0.047619	6.29454	3.67478	0.0121029	0.158778	0.143258	JUN/ID2/KLF4	3	CC	upreg	CM
GO:0060205	cytoplasmic vesicle lumen	7/151	329/19960	0.0212766	2.81246	2.89415	0.0127435	0.158778	0.143258	HSPA6/HGF/SRGN/PNP/SERPINA3/ELANE/GLA	7	CC	upreg	CM
GO:0031983	vesicle lumen	7/151	330/19960	0.0212121	2.80393	2.88499	0.0129396	0.158778	0.143258	HSPA6/HGF/SRGN/PNP/SERPINA3/ELANE/GLA	7	CC	upreg	CM
GO:0071682	endocytic vesicle lumen	2/151	23/19960	0.0869565	11.4944	4.39661	0.0129615	0.158778	0.143258	HSPH1/CSF3	2	CC	upreg	CM
GO:0031093	platelet alpha granule lumen	3/151	67/19960	0.0447761	5.91875	3.52102	0.0142849	0.16547	0.149296	HGF/SRGN/SERPINA3	3	CC	upreg	CM
GO:0005771	multivesicular body	3/151	68/19960	0.0441176	5.83171	3.48452	0.014863	0.16547	0.149296	COLEC10/GFRA1/CHMP1B	3	CC	upreg	CM
GO:0005925	focal adhesion	8/151	424/19960	0.0188679	2.49406	2.71495	0.0155339	0.16547	0.149296	IL1RL1/HSPA1A/HSPA1B/AKAP12/HSPB1/HSPA5/FLRT3/ITGB2	8	CC	upreg	CM
GO:1905368	peptidase complex	4/151	129/19960	0.0310078	4.09877	3.08275	0.0167229	0.168841	0.152338	F3/CFH/HSPB1/COLEC10	4	CC	upreg	CM
GO:0030055	cell-substrate junction	8/151	434/19960	0.0184332	2.4366	2.6418	0.0176151	0.168841	0.152338	IL1RL1/HSPA1A/HSPA1B/AKAP12/HSPB1/HSPA5/FLRT3/ITGB2	8	CC	upreg	CM
GO:0030018	Z disc	4/151	133/19960	0.0300752	3.9755	3.00597	0.0184931	0.168841	0.152338	DNAJB4/HSPB1/BAG3/CRYAB	4	CC	upreg	CM
GO:0016234	inclusion body	3/151	74/19960	0.0405405	5.35887	3.27976	0.018607	0.168841	0.152338	HSPA1A/HSPA1B/BAG3	3	CC	upreg	CM
GO:0030017	sarcomere	5/151	222/19960	0.0225225	2.97715	2.58637	0.0269923	0.236182	0.213097	DNAJB4/HSPB1/BAG3/CRYAB/POLR2M	5	CC	upreg	CM
GO:0031091	platelet alpha granule	3/151	91/19960	0.032967	4.35776	2.80291	0.0318009	0.259707	0.234322	HGF/SRGN/SERPINA3	3	CC	upreg	CM
GO:0035578	azurophil granule lumen	3/151	91/19960	0.032967	4.35776	2.80291	0.0318009	0.259707	0.234322	SERPINA3/ELANE/GLA	3	CC	upreg	CM
GO:0032993	protein-DNA complex	5/151	240/19960	0.0208333	2.75386	2.38657	0.0359726	0.2843	0.256511	BCAS2/H3C1/H4C1/FOS/POLR2M	5	CC	upreg	CM
GO:0030016	myofibril	5/151	243/19960	0.0205761	2.71986	2.35507	0.0376284	0.284631	0.25681	DNAJB4/HSPB1/BAG3/CRYAB/POLR2M	5	CC	upreg	CM
GO:1905369	endopeptidase complex	3/151	98/19960	0.0306122	4.04649	2.63954	0.0383381	0.284631	0.25681	CFH/HSPB1/COLEC10	3	CC	upreg	CM
GO:0043292	contractile muscle fiber	5/151	253/19960	0.0197628	2.61236	2.2534	0.0434823	0.313328	0.282702	DNAJB4/HSPB1/BAG3/CRYAB/POLR2M	5	CC	upreg	CM
GO:0005775	vacuolar lumen	4/151	178/19960	0.0224719	2.97046	2.30552	0.0464406	0.325084	0.293309	SERPINA3/CSF3/ELANE/GLA	4	CC	upreg	CM
GO:0043269	regulation of monoatomic ion transport	1962-08-01	480/18986	0.0166667	5.10376	5.21244	0.000160694	0.112462	0.102408	KCNS3/CAMK2A/HFE/FXYD6/SCN2B/P2RX7/CEMIP/MAOB	8	BP	downreg	CM
GO:0010959	regulation of metal ion transport	1962-07-01	408/18986	0.0171569	5.25387	4.97176	0.000357228	0.112462	0.102408	KCNS3/CAMK2A/HFE/FXYD6/SCN2B/P2RX7/CEMIP	7	BP	downreg	CM
GO:0032892	positive regulation of organic acid transport	1962-03-01	47/18986	0.0638298	19.5463	7.28657	0.00048537	0.112462	0.102408	SLC6A1/P2RX7/MAP2K6	3	BP	downreg	CM
GO:0035581	sequestering of extracellular ligand from receptor	1962-02-01	11/18986	0.181818	55.6774	10.3826	0.000566243	0.112462	0.102408	CER1/DAND5	2	BP	downreg	CM
GO:0043270	positive regulation of monoatomic ion transport	1962-05-01	215/18986	0.0232558	7.12153	5.1669	0.000680899	0.112462	0.102408	CAMK2A/FXYD6/SCN2B/P2RX7/CEMIP	5	BP	downreg	CM
GO:0014051	gamma-aminobutyric acid secretion	1962-02-01	13/18986	0.153846	47.1117	9.51939	0.000799663	0.112462	0.102408	SLC6A1/P2RX7	2	BP	downreg	CM
GO:1900115	extracellular regulation of signal transduction	1962-02-01	13/18986	0.153846	47.1117	9.51939	0.000799663	0.112462	0.102408	CER1/DAND5	2	BP	downreg	CM
GO:1900116	extracellular negative regulation of signal transduction	1962-02-01	13/18986	0.153846	47.1117	9.51939	0.000799663	0.112462	0.102408	CER1/DAND5	2	BP	downreg	CM
GO:0050805	negative regulation of synaptic transmission	1962-03-01	58/18986	0.0517241	15.8393	6.47841	0.000900348	0.112462	0.102408	SLC6A1/SORCS3/SHANK2	3	BP	downreg	CM
GO:0032308	positive regulation of prostaglandin secretion	1962-02-01	14/18986	0.142857	43.7465	9.15805	0.000930979	0.112462	0.102408	P2RX7/MAP2K6	2	BP	downreg	CM
GO:0032306	regulation of prostaglandin secretion	1962-02-01	15/18986	0.133333	40.8301	8.83297	0.00107195	0.11772	0.107195	P2RX7/MAP2K6	2	BP	downreg	CM
GO:0002931	response to ischemia	1962-03-01	66/18986	0.0454545	13.9194	6.01793	0.0013107	0.126308	0.115016	CAMK2A/P2RX7/MAP2K6	3	BP	downreg	CM
GO:0006814	sodium ion transport	1962-05-01	251/18986	0.0199203	6.10012	4.6557	0.00135928	0.126308	0.115016	SLC6A1/SLC6A20/FXYD6/SCN2B/P2RX7	5	BP	downreg	CM
GO:0032926	negative regulation of activin receptor signaling pathway	1962-02-01	18/18986	0.111111	34.0251	8.02351	0.00155216	0.128462	0.116977	CER1/DAND5	2	BP	downreg	CM
GO:0032310	prostaglandin secretion	1962-02-01	19/18986	0.105263	32.2343	7.79658	0.00173113	0.128462	0.116977	P2RX7/MAP2K6	2	BP	downreg	CM
GO:0055003	cardiac myofibril assembly	1962-02-01	19/18986	0.105263	32.2343	7.79658	0.00173113	0.128462	0.116977	ADPRHL1/FHOD3	2	BP	downreg	CM
GO:0032305	positive regulation of icosanoid secretion	1962-02-01	20/18986	0.1	30.6226	7.58656	0.00191944	0.128462	0.116977	P2RX7/MAP2K6	2	BP	downreg	CM
GO:0015812	gamma-aminobutyric acid transport	1962-02-01	21/18986	0.0952381	29.1644	7.39142	0.00211703	0.128462	0.116977	SLC6A1/P2RX7	2	BP	downreg	CM
GO:0032890	regulation of organic acid transport	1962-03-01	78/18986	0.0384615	11.7779	5.45951	0.00211934	0.128462	0.116977	SLC6A1/P2RX7/MAP2K6	3	BP	downreg	CM
GO:0032303	regulation of icosanoid secretion	1962-02-01	22/18986	0.0909091	27.8387	7.20946	0.00232385	0.128462	0.116977	P2RX7/MAP2K6	2	BP	downreg	CM
GO:0002028	regulation of sodium ion transport	1962-03-01	82/18986	0.0365854	11.2034	5.29992	0.00244441	0.128462	0.116977	FXYD6/SCN2B/P2RX7	3	BP	downreg	CM
GO:0051952	regulation of amine transport	1962-03-01	83/18986	0.0361446	11.0684	5.26173	0.00253021	0.128462	0.116977	KCNA2/SLC6A1/P2RX7	3	BP	downreg	CM
GO:0023019	signal transduction involved in regulation of gene expression	1962-02-01	23/18986	0.0869565	26.6283	7.03923	0.00253983	0.128462	0.116977	CER1/DAND5	2	BP	downreg	CM
GO:0030431	sleep	1962-02-01	24/18986	0.0833333	25.5188	6.87951	0.00276491	0.128462	0.116977	KCNA2/PTGDR	2	BP	downreg	CM
GO:0051957	positive regulation of amino acid transport	1962-02-01	24/18986	0.0833333	25.5188	6.87951	0.00276491	0.128462	0.116977	SLC6A1/P2RX7	2	BP	downreg	CM
GO:2000193	positive regulation of fatty acid transport	1962-02-01	24/18986	0.0833333	25.5188	6.87951	0.00276491	0.128462	0.116977	P2RX7/MAP2K6	2	BP	downreg	CM
GO:0035725	sodium ion transmembrane transport	1962-04-01	188/18986	0.0212766	6.51544	4.35009	0.00332011	0.148544	0.135264	SLC6A1/SLC6A20/FXYD6/SCN2B	4	BP	downreg	CM
GO:0032925	regulation of activin receptor signaling pathway	1962-02-01	27/18986	0.0740741	22.6834	6.45351	0.00349418	0.149903	0.136501	CER1/DAND5	2	BP	downreg	CM
GO:0140115	export across plasma membrane	1962-03-01	94/18986	0.0319149	9.77316	4.88063	0.00359867	0.149903	0.136501	KCNA2/SLC22A18/FXYD6	3	BP	downreg	CM
GO:0015837	amine transport	1962-03-01	96/18986	0.03125	9.56956	4.81807	0.00381822	0.153747	0.140002	KCNA2/SLC6A1/P2RX7	3	BP	downreg	CM
GO:0015732	prostaglandin transport	1962-02-01	30/18986	0.0666667	20.4151	6.09145	0.00430324	0.167688	0.152696	P2RX7/MAP2K6	2	BP	downreg	CM
GO:0010038	response to metal ion	1962-05-01	345/18986	0.0144928	4.43806	3.68878	0.00533991	0.180167	0.16406	SLC6A1/HFE/CER1/P2RX7/MAOB	5	BP	downreg	CM
GO:0023061	signal release	1962-06-01	493/18986	0.0121704	3.72689	3.51141	0.00534989	0.180167	0.16406	KCNA2/CAMK2A/HFE/P2RX7/MAP2K6/MAOB	6	BP	downreg	CM
GO:0030212	hyaluronan metabolic process	1962-02-01	34/18986	0.0588235	18.0133	5.68322	0.00550338	0.180167	0.16406	ITIH5/CEMIP	2	BP	downreg	CM
GO:0060292	long-term synaptic depression	1962-02-01	34/18986	0.0588235	18.0133	5.68322	0.00550338	0.180167	0.16406	SORCS3/SHANK2	2	BP	downreg	CM
GO:2000191	regulation of fatty acid transport	1962-02-01	34/18986	0.0588235	18.0133	5.68322	0.00550338	0.180167	0.16406	P2RX7/MAP2K6	2	BP	downreg	CM
GO:0060348	bone development	1962-04-01	217/18986	0.0184332	5.64472	3.93879	0.00551837	0.180167	0.16406	LRRC17/CER1/FREM1/MAP2K6	4	BP	downreg	CM
GO:0010765	positive regulation of sodium ion transport	1962-02-01	36/18986	0.0555556	17.0125	5.50429	0.00615445	0.195647	0.178155	FXYD6/SCN2B	2	BP	downreg	CM
GO:0051928	positive regulation of calcium ion transport	1962-03-01	120/18986	0.025	7.65565	4.18635	0.00710114	0.219953	0.200289	CAMK2A/P2RX7/CEMIP	3	BP	downreg	CM
GO:0001916	positive regulation of T cell mediated cytotoxicity	1962-02-01	41/18986	0.0487805	14.9378	5.1137	0.0079272	0.233562	0.212681	HFE/P2RX7	2	BP	downreg	CM
GO:0051954	positive regulation of amine transport	1962-02-01	41/18986	0.0487805	14.9378	5.1137	0.0079272	0.233562	0.212681	SLC6A1/P2RX7	2	BP	downreg	CM
GO:0051955	regulation of amino acid transport	1962-02-01	42/18986	0.047619	14.5822	5.04374	0.00830617	0.238901	0.217543	SLC6A1/P2RX7	2	BP	downreg	CM
GO:0046717	acid secretion	1962-02-01	44/18986	0.0454545	13.9194	4.91076	0.00908811	0.255313	0.232487	SLC6A1/P2RX7	2	BP	downreg	CM
GO:0032309	icosanoid secretion	1962-02-01	47/18986	0.0425532	13.0309	4.72675	0.0103202	0.283336	0.258004	P2RX7/MAP2K6	2	BP	downreg	CM
GO:0003254	regulation of membrane depolarization	1962-02-01	50/18986	0.04	12.249	4.5588	0.0116219	0.30085	0.273953	SCN2B/P2RX7	2	BP	downreg	CM
GO:1904064	positive regulation of cation transmembrane transport	1962-03-01	144/18986	0.0208333	6.3797	3.70912	0.0116616	0.30085	0.273953	FXYD6/P2RX7/CEMIP	3	BP	downreg	CM
GO:0009636	response to toxic substance	1962-04-01	270/18986	0.0148148	4.53668	3.35016	0.0117053	0.30085	0.273953	SLC6A1/SLC22A18/SCN2B/MAOB	4	BP	downreg	CM
GO:0001914	regulation of T cell mediated cytotoxicity	1962-02-01	51/18986	0.0392157	12.0089	4.50598	0.0120711	0.302671	0.275611	HFE/P2RX7	2	BP	downreg	CM
GO:0032924	activin receptor signaling pathway	1962-02-01	52/18986	0.0384615	11.7779	4.45461	0.0125278	0.302671	0.275611	CER1/DAND5	2	BP	downreg	CM
GO:0140353	lipid export from cell	1962-02-01	52/18986	0.0384615	11.7779	4.45461	0.0125278	0.302671	0.275611	P2RX7/MAP2K6	2	BP	downreg	CM
GO:0042692	muscle cell differentiation	1962-05-01	432/18986	0.0115741	3.54428	3.06184	0.0133375	0.310241	0.282504	SMYD1/FBXO40/ADAM12/ADPRHL1/FHOD3	5	BP	downreg	CM
GO:0002279	mast cell activation involved in immune response	1962-02-01	56/18986	0.0357143	10.9366	4.26239	0.0144288	0.310241	0.282504	ENPP3/PTGDR	2	BP	downreg	CM
GO:0034767	positive regulation of monoatomic ion transmembrane transport	1962-03-01	157/18986	0.0191083	5.85145	3.49383	0.0146956	0.310241	0.282504	FXYD6/P2RX7/CEMIP	3	BP	downreg	CM
GO:0007612	learning	1962-03-01	159/18986	0.0188679	5.77785	3.46286	0.0151983	0.310241	0.282504	SLC6A1/SORCS3/SHANK2	3	BP	downreg	CM
GO:1903409	reactive oxygen species biosynthetic process	1962-02-01	60/18986	0.0333333	10.2075	4.08869	0.0164462	0.310241	0.282504	CCN6/MAOB	2	BP	downreg	CM
GO:0006865	amino acid transport	1962-03-01	165/18986	0.0181818	5.56774	3.373	0.0167647	0.310241	0.282504	SLC6A1/SLC6A20/P2RX7	3	BP	downreg	CM
GO:0001913	T cell mediated cytotoxicity	1962-02-01	61/18986	0.0327869	10.0402	4.0478	0.0169683	0.310241	0.282504	HFE/P2RX7	2	BP	downreg	CM
GO:0042391	regulation of membrane potential	1962-05-01	466/18986	0.0107296	3.28568	2.85946	0.0179456	0.310241	0.282504	KCNA2/KCNS3/CCN6/SCN2B/P2RX7	5	BP	downreg	CM
GO:0071715	icosanoid transport	1962-02-01	64/18986	0.03125	9.56956	3.93061	0.0185767	0.310241	0.282504	P2RX7/MAP2K6	2	BP	downreg	CM
GO:0030509	BMP signaling pathway	1962-03-01	172/18986	0.0174419	5.34115	3.27358	0.0187026	0.310241	0.282504	HFE/CER1/DAND5	3	BP	downreg	CM
GO:0051146	striated muscle cell differentiation	1962-04-01	314/18986	0.0127389	3.90097	2.96693	0.0193273	0.310241	0.282504	SMYD1/ADAM12/ADPRHL1/FHOD3	4	BP	downreg	CM
GO:1904062	regulation of monoatomic cation transmembrane transport	1962-04-01	318/18986	0.0125786	3.8519	2.93557	0.0201423	0.310241	0.282504	KCNS3/FXYD6/P2RX7/CEMIP	4	BP	downreg	CM
GO:0001508	action potential	1962-03-01	177/18986	0.0169492	5.19027	3.20583	0.0201601	0.310241	0.282504	KCNA2/KCNS3/SCN2B	3	BP	downreg	CM
GO:0051047	positive regulation of secretion	1962-04-01	322/18986	0.0124224	3.80405	2.90473	0.0209782	0.310241	0.282504	SLC6A1/HFE/P2RX7/MAP2K6	4	BP	downreg	CM
GO:0045576	mast cell activation	1962-02-01	69/18986	0.0289855	8.87611	3.7515	0.021394	0.310241	0.282504	ENPP3/PTGDR	2	BP	downreg	CM
GO:0090092	regulation of transmembrane receptor protein serine/threonine kinase signaling pathway	1962-04-01	326/18986	0.0122699	3.75737	2.87437	0.0218354	0.310241	0.282504	HFE/CER1/DAND5/FERMT1	4	BP	downreg	CM
GO:0071772	response to BMP	1962-03-01	184/18986	0.0163043	4.99281	3.11516	0.0223033	0.310241	0.282504	HFE/CER1/DAND5	3	BP	downreg	CM
GO:0071773	cellular response to BMP stimulus	1962-03-01	184/18986	0.0163043	4.99281	3.11516	0.0223033	0.310241	0.282504	HFE/CER1/DAND5	3	BP	downreg	CM
GO:1901292	nucleoside phosphate catabolic process	1962-03-01	184/18986	0.0163043	4.99281	3.11516	0.0223033	0.310241	0.282504	ENPP3/P2RX7/PDE4C	3	BP	downreg	CM
GO:0001912	positive regulation of leukocyte mediated cytotoxicity	1962-02-01	71/18986	0.028169	8.62608	3.68487	0.0225677	0.310241	0.282504	HFE/P2RX7	2	BP	downreg	CM
GO:0061371	determination of heart left/right asymmetry	1962-02-01	71/18986	0.028169	8.62608	3.68487	0.0225677	0.310241	0.282504	CER1/DAND5	2	BP	downreg	CM
GO:0015800	acidic amino acid transport	1962-02-01	73/18986	0.0273973	8.38975	3.62081	0.0237675	0.310241	0.282504	SLC6A1/P2RX7	2	BP	downreg	CM
GO:0051881	regulation of mitochondrial membrane potential	1962-02-01	73/18986	0.0273973	8.38975	3.62081	0.0237675	0.310241	0.282504	CCN6/P2RX7	2	BP	downreg	CM
GO:0030514	negative regulation of BMP signaling pathway	1962-02-01	74/18986	0.027027	8.27637	3.58969	0.0243771	0.310241	0.282504	CER1/DAND5	2	BP	downreg	CM
GO:0002711	positive regulation of T cell mediated immunity	1962-02-01	75/18986	0.0266667	8.16602	3.55915	0.0249931	0.310241	0.282504	HFE/P2RX7	2	BP	downreg	CM
GO:0051235	maintenance of location	1962-04-01	345/18986	0.0115942	3.55044	2.73644	0.0261993	0.310241	0.282504	CER1/P2RX7/CEMIP/DAND5	4	BP	downreg	CM
GO:0015844	monoamine transport	1962-02-01	77/18986	0.025974	7.95392	3.49974	0.026244	0.310241	0.282504	KCNA2/MAOB	2	BP	downreg	CM
GO:0030239	myofibril assembly	1962-02-01	77/18986	0.025974	7.95392	3.49974	0.026244	0.310241	0.282504	ADPRHL1/FHOD3	2	BP	downreg	CM
GO:0031343	positive regulation of cell killing	1962-02-01	78/18986	0.025641	7.85194	3.47083	0.0268788	0.310241	0.282504	HFE/P2RX7	2	BP	downreg	CM
GO:0018107	peptidyl-threonine phosphorylation	1962-02-01	79/18986	0.0253165	7.75255	3.44243	0.0275199	0.310241	0.282504	CAMK2A/CEMIP	2	BP	downreg	CM
GO:0034765	regulation of monoatomic ion transmembrane transport	1962-04-01	354/18986	0.0112994	3.46018	2.67444	0.0284374	0.310241	0.282504	KCNS3/FXYD6/P2RX7/CEMIP	4	BP	downreg	CM
GO:0046942	carboxylic acid transport	1962-04-01	357/18986	0.0112045	3.4311	2.65422	0.0292081	0.310241	0.282504	SLC6A1/SLC6A20/P2RX7/MAP2K6	4	BP	downreg	CM
GO:0015849	organic acid transport	1962-04-01	358/18986	0.0111732	3.42152	2.64753	0.0294678	0.310241	0.282504	SLC6A1/SLC6A20/P2RX7/MAP2K6	4	BP	downreg	CM
GO:0019233	sensory perception of pain	1962-02-01	83/18986	0.0240964	7.37894	3.33362	0.0301453	0.310241	0.282504	KCNA2/P2RX7	2	BP	downreg	CM
GO:0006836	neurotransmitter transport	1962-03-01	209/18986	0.0143541	4.39559	2.82533	0.0309371	0.310241	0.282504	SLC6A1/CAMK2A/P2RX7	3	BP	downreg	CM
GO:1904427	positive regulation of calcium ion transmembrane transport	1962-02-01	85/18986	0.0235294	7.20531	3.2819	0.031494	0.310241	0.282504	P2RX7/CEMIP	2	BP	downreg	CM
GO:0001820	serotonin secretion	1962-01-01	10/18986	0.1	30.6226	5.36309	0.0321874	0.310241	0.282504	MAOB	1	BP	downreg	CM
GO:0003140	determination of left/right asymmetry in lateral mesoderm	1962-01-01	10/18986	0.1	30.6226	5.36309	0.0321874	0.310241	0.282504	DAND5	1	BP	downreg	CM
GO:0019614	catechol-containing compound catabolic process	1962-01-01	10/18986	0.1	30.6226	5.36309	0.0321874	0.310241	0.282504	MAOB	1	BP	downreg	CM
GO:0033004	negative regulation of mast cell activation	1962-01-01	10/18986	0.1	30.6226	5.36309	0.0321874	0.310241	0.282504	ENPP3	1	BP	downreg	CM
GO:0042420	dopamine catabolic process	1962-01-01	10/18986	0.1	30.6226	5.36309	0.0321874	0.310241	0.282504	MAOB	1	BP	downreg	CM
GO:0042424	catecholamine catabolic process	1962-01-01	10/18986	0.1	30.6226	5.36309	0.0321874	0.310241	0.282504	MAOB	1	BP	downreg	CM
GO:0048263	determination of dorsal identity	1962-01-01	10/18986	0.1	30.6226	5.36309	0.0321874	0.310241	0.282504	CER1	1	BP	downreg	CM
GO:0051933	amino acid neurotransmitter reuptake	1962-01-01	10/18986	0.1	30.6226	5.36309	0.0321874	0.310241	0.282504	SLC6A1	1	BP	downreg	CM
GO:0060371	regulation of atrial cardiac muscle cell membrane depolarization	1962-01-01	10/18986	0.1	30.6226	5.36309	0.0321874	0.310241	0.282504	SCN2B	1	BP	downreg	CM
GO:1901750	leukotriene D4 biosynthetic process	1962-01-01	10/18986	0.1	30.6226	5.36309	0.0321874	0.310241	0.282504	GGTA1	1	BP	downreg	CM
GO:0006900	vesicle budding from membrane	1962-02-01	88/18986	0.0227273	6.95968	3.20738	0.0335612	0.310241	0.282504	SEC16B/P2RX7	2	BP	downreg	CM
GO:0010232	vascular transport	1962-02-01	88/18986	0.0227273	6.95968	3.20738	0.0335612	0.310241	0.282504	SLC6A1/SLC6A20	2	BP	downreg	CM
GO:0032370	positive regulation of lipid transport	1962-02-01	88/18986	0.0227273	6.95968	3.20738	0.0335612	0.310241	0.282504	P2RX7/MAP2K6	2	BP	downreg	CM
GO:0055013	cardiac muscle cell development	1962-02-01	88/18986	0.0227273	6.95968	3.20738	0.0335612	0.310241	0.282504	ADPRHL1/FHOD3	2	BP	downreg	CM
GO:0150104	transport across blood-brain barrier	1962-02-01	88/18986	0.0227273	6.95968	3.20738	0.0335612	0.310241	0.282504	SLC6A1/SLC6A20	2	BP	downreg	CM
GO:0031032	actomyosin structure organization	1962-03-01	216/18986	0.0138889	4.25314	2.75227	0.0336276	0.310241	0.282504	ADPRHL1/ARHGAP28/FHOD3	3	BP	downreg	CM
GO:0034764	positive regulation of transmembrane transport	1962-03-01	216/18986	0.0138889	4.25314	2.75227	0.0336276	0.310241	0.282504	FXYD6/P2RX7/CEMIP	3	BP	downreg	CM
GO:0018210	peptidyl-threonine modification	1962-02-01	89/18986	0.0224719	6.88148	3.18332	0.0342618	0.310241	0.282504	CAMK2A/CEMIP	2	BP	downreg	CM
GO:0008306	associative learning	1962-02-01	90/18986	0.0222222	6.80502	3.15962	0.0349681	0.310241	0.282504	SLC6A1/SHANK2	2	BP	downreg	CM
GO:0048167	regulation of synaptic plasticity	1962-03-01	220/18986	0.0136364	4.17581	2.7119	0.0352183	0.310241	0.282504	CAMK2A/SORCS3/SHANK2	3	BP	downreg	CM
GO:0002725	negative regulation of T cell cytokine production	1962-01-01	11/18986	0.0909091	27.8387	5.09638	0.0353496	0.310241	0.282504	HFE	1	BP	downreg	CM
GO:0014049	positive regulation of glutamate secretion	1962-01-01	11/18986	0.0909091	27.8387	5.09638	0.0353496	0.310241	0.282504	P2RX7	1	BP	downreg	CM
GO:0016559	peroxisome fission	1962-01-01	11/18986	0.0909091	27.8387	5.09638	0.0353496	0.310241	0.282504	SEC16B	1	BP	downreg	CM
GO:0021604	cranial nerve structural organization	1962-01-01	11/18986	0.0909091	27.8387	5.09638	0.0353496	0.310241	0.282504	KCNA2	1	BP	downreg	CM
GO:0032060	bleb assembly	1962-01-01	11/18986	0.0909091	27.8387	5.09638	0.0353496	0.310241	0.282504	P2RX7	1	BP	downreg	CM
GO:0033625	positive regulation of integrin activation	1962-01-01	11/18986	0.0909091	27.8387	5.09638	0.0353496	0.310241	0.282504	FERMT1	1	BP	downreg	CM
GO:0035524	proline transmembrane transport	1962-01-01	11/18986	0.0909091	27.8387	5.09638	0.0353496	0.310241	0.282504	SLC6A20	1	BP	downreg	CM
GO:0046085	adenosine metabolic process	1962-01-01	11/18986	0.0909091	27.8387	5.09638	0.0353496	0.310241	0.282504	PTGDR	1	BP	downreg	CM
GO:0048262	determination of dorsal/ventral asymmetry	1962-01-01	11/18986	0.0909091	27.8387	5.09638	0.0353496	0.310241	0.282504	CER1	1	BP	downreg	CM
GO:1903276	regulation of sodium ion export across plasma membrane	1962-01-01	11/18986	0.0909091	27.8387	5.09638	0.0353496	0.310241	0.282504	FXYD6	1	BP	downreg	CM
GO:1903278	positive regulation of sodium ion export across plasma membrane	1962-01-01	11/18986	0.0909091	27.8387	5.09638	0.0353496	0.310241	0.282504	FXYD6	1	BP	downreg	CM
GO:1903689	regulation of wound healing, spreading of epidermal cells	1962-01-01	11/18986	0.0909091	27.8387	5.09638	0.0353496	0.310241	0.282504	FERMT1	1	BP	downreg	CM
GO:1904181	positive regulation of membrane depolarization	1962-01-01	11/18986	0.0909091	27.8387	5.09638	0.0353496	0.310241	0.282504	P2RX7	1	BP	downreg	CM
GO:0010469	regulation of signaling receptor activity	1962-02-01	91/18986	0.021978	6.73024	3.13628	0.0356801	0.310241	0.282504	HFE/LYNX1	2	BP	downreg	CM
GO:1903510	mucopolysaccharide metabolic process	1962-02-01	91/18986	0.021978	6.73024	3.13628	0.0356801	0.310241	0.282504	ITIH5/CEMIP	2	BP	downreg	CM
GO:0009143	nucleoside triphosphate catabolic process	1962-01-01	12/18986	0.0833333	25.5188	4.86301	0.0385015	0.310241	0.282504	ENPP3	1	BP	downreg	CM
GO:0019336	phenol-containing compound catabolic process	1962-01-01	12/18986	0.0833333	25.5188	4.86301	0.0385015	0.310241	0.282504	MAOB	1	BP	downreg	CM
GO:0032610	interleukin-1 alpha production	1962-01-01	12/18986	0.0833333	25.5188	4.86301	0.0385015	0.310241	0.282504	P2RX7	1	BP	downreg	CM
GO:0032650	regulation of interleukin-1 alpha production	1962-01-01	12/18986	0.0833333	25.5188	4.86301	0.0385015	0.310241	0.282504	P2RX7	1	BP	downreg	CM
GO:0098880	maintenance of postsynaptic specialization structure	1962-01-01	12/18986	0.0833333	25.5188	4.86301	0.0385015	0.310241	0.282504	SHANK2	1	BP	downreg	CM
GO:1900121	negative regulation of receptor binding	1962-01-01	12/18986	0.0833333	25.5188	4.86301	0.0385015	0.310241	0.282504	HFE	1	BP	downreg	CM
GO:1901748	leukotriene D4 metabolic process	1962-01-01	12/18986	0.0833333	25.5188	4.86301	0.0385015	0.310241	0.282504	GGTA1	1	BP	downreg	CM
GO:0045185	maintenance of protein location	1962-02-01	95/18986	0.0210526	6.44686	3.04632	0.0385839	0.310241	0.282504	CER1/DAND5	2	BP	downreg	CM
GO:0055006	cardiac cell development	1962-02-01	95/18986	0.0210526	6.44686	3.04632	0.0385839	0.310241	0.282504	ADPRHL1/FHOD3	2	BP	downreg	CM
GO:0001942	hair follicle development	1962-02-01	96/18986	0.0208333	6.3797	3.02463	0.0393236	0.310241	0.282504	EDAR/FERMT1	2	BP	downreg	CM
GO:0051899	membrane depolarization	1962-02-01	97/18986	0.0206186	6.31393	3.00326	0.0400687	0.310241	0.282504	SCN2B/P2RX7	2	BP	downreg	CM
GO:0048705	skeletal system morphogenesis	1962-03-01	232/18986	0.012931	3.95982	2.59631	0.040221	0.310241	0.282504	CER1/FREM1/P2RX7	3	BP	downreg	CM
GO:0141091	transforming growth factor beta receptor superfamily signaling pathway	1962-04-01	397/18986	0.0100756	3.0854	2.40354	0.0406789	0.310241	0.282504	HFE/CER1/DAND5/FERMT1	4	BP	downreg	CM
GO:0001910	regulation of leukocyte mediated cytotoxicity	1962-02-01	98/18986	0.0204082	6.24951	2.98218	0.0408192	0.310241	0.282504	HFE/P2RX7	2	BP	downreg	CM
GO:0002275	myeloid cell activation involved in immune response	1962-02-01	98/18986	0.0204082	6.24951	2.98218	0.0408192	0.310241	0.282504	ENPP3/PTGDR	2	BP	downreg	CM
GO:0022404	molting cycle process	1962-02-01	99/18986	0.020202	6.18638	2.96139	0.041575	0.310241	0.282504	EDAR/FERMT1	2	BP	downreg	CM
GO:0022405	hair cycle process	1962-02-01	99/18986	0.020202	6.18638	2.96139	0.041575	0.310241	0.282504	EDAR/FERMT1	2	BP	downreg	CM
GO:0010269	response to selenium ion	1962-01-01	13/18986	0.0769231	23.5558	4.65647	0.0416433	0.310241	0.282504	MAOB	1	BP	downreg	CM
GO:0015824	proline transport	1962-01-01	13/18986	0.0769231	23.5558	4.65647	0.0416433	0.310241	0.282504	SLC6A20	1	BP	downreg	CM
GO:0015838	amino-acid betaine transport	1962-01-01	13/18986	0.0769231	23.5558	4.65647	0.0416433	0.310241	0.282504	SLC6A20	1	BP	downreg	CM
GO:0030213	hyaluronan biosynthetic process	1962-01-01	13/18986	0.0769231	23.5558	4.65647	0.0416433	0.310241	0.282504	CEMIP	1	BP	downreg	CM
GO:0042074	cell migration involved in gastrulation	1962-01-01	13/18986	0.0769231	23.5558	4.65647	0.0416433	0.310241	0.282504	CER1	1	BP	downreg	CM
GO:0070863	positive regulation of protein exit from endoplasmic reticulum	1962-01-01	13/18986	0.0769231	23.5558	4.65647	0.0416433	0.310241	0.282504	SEC16B	1	BP	downreg	CM
GO:0060349	bone morphogenesis	1962-02-01	100/18986	0.02	6.12452	2.94088	0.0423361	0.310241	0.282504	CER1/FREM1	2	BP	downreg	CM
GO:0046434	organophosphate catabolic process	1962-03-01	242/18986	0.0123967	3.79619	2.50575	0.0446512	0.310241	0.282504	ENPP3/P2RX7/PDE4C	3	BP	downreg	CM
GO:0072593	reactive oxygen species metabolic process	1962-03-01	242/18986	0.0123967	3.79619	2.50575	0.0446512	0.310241	0.282504	CCN6/P2RX7/MAOB	3	BP	downreg	CM
GO:0009214	cyclic nucleotide catabolic process	1962-01-01	14/18986	0.0714286	21.8733	4.47191	0.0447751	0.310241	0.282504	PDE4C	1	BP	downreg	CM
GO:0010524	positive regulation of calcium ion transport into cytosol	1962-01-01	14/18986	0.0714286	21.8733	4.47191	0.0447751	0.310241	0.282504	P2RX7	1	BP	downreg	CM
GO:0015803	branched-chain amino acid transport	1962-01-01	14/18986	0.0714286	21.8733	4.47191	0.0447751	0.310241	0.282504	SLC6A20	1	BP	downreg	CM
GO:0030238	male sex determination	1962-01-01	14/18986	0.0714286	21.8733	4.47191	0.0447751	0.310241	0.282504	PTGDR	1	BP	downreg	CM
GO:0006813	potassium ion transport	1962-03-01	248/18986	0.0120968	3.70434	2.4537	0.0474219	0.310241	0.282504	KCNA2/KCNS3/FXYD6	3	BP	downreg	CM
GO:0010457	centriole-centriole cohesion	1962-01-01	15/18986	0.0666667	20.4151	4.3056	0.0478967	0.310241	0.282504	CCDC102B	1	BP	downreg	CM
GO:0042308	negative regulation of protein import into nucleus	1962-01-01	15/18986	0.0666667	20.4151	4.3056	0.0478967	0.310241	0.282504	FERMT1	1	BP	downreg	CM
GO:0045187	regulation of circadian sleep/wake cycle, sleep	1962-01-01	15/18986	0.0666667	20.4151	4.3056	0.0478967	0.310241	0.282504	KCNA2	1	BP	downreg	CM
GO:0048820	hair follicle maturation	1962-01-01	15/18986	0.0666667	20.4151	4.3056	0.0478967	0.310241	0.282504	FERMT1	1	BP	downreg	CM
GO:0051412	response to corticosterone	1962-01-01	15/18986	0.0666667	20.4151	4.3056	0.0478967	0.310241	0.282504	MAOB	1	BP	downreg	CM
GO:0070234	positive regulation of T cell apoptotic process	1962-01-01	15/18986	0.0666667	20.4151	4.3056	0.0478967	0.310241	0.282504	P2RX7	1	BP	downreg	CM
GO:1900452	regulation of long-term synaptic depression	1962-01-01	15/18986	0.0666667	20.4151	4.3056	0.0478967	0.310241	0.282504	SORCS3	1	BP	downreg	CM
GO:1901160	primary amino compound metabolic process	1962-01-01	15/18986	0.0666667	20.4151	4.3056	0.0478967	0.310241	0.282504	MAOB	1	BP	downreg	CM
GO:0002709	regulation of T cell mediated immunity	1962-02-01	108/18986	0.0185185	5.67085	2.78628	0.0486103	0.310241	0.282504	HFE/P2RX7	2	BP	downreg	CM
GO:0051346	negative regulation of hydrolase activity	1962-03-01	252/18986	0.0119048	3.64555	2.41989	0.0493154	0.310241	0.282504	CAMK2A/ITIH5/CPAMD8	3	BP	downreg	CM
GO:0090100	positive regulation of transmembrane receptor protein serine/threonine kinase signaling pathway	1962-02-01	109/18986	0.0183486	5.61882	2.76804	0.0494171	0.310241	0.282504	HFE/FERMT1	2	BP	downreg	CM
GO:0030548	acetylcholine receptor regulator activity	1962-02-01	16/18737	0.125	37.7762	8.47943	0.00125473	0.0697303	0.0533118	LYPD6/LYNX1	2	MF	downreg	CM
GO:0099602	neurotransmitter receptor regulator activity	1962-02-01	17/18737	0.117647	35.5541	8.21249	0.001419	0.0697303	0.0533118	LYPD6/LYNX1	2	MF	downreg	CM
GO:0099106	ion channel regulator activity	1962-04-01	159/18737	0.0251572	7.60276	4.81758	0.0019002	0.0697303	0.0533118	KCNS3/LYNX1/FXYD6/SCN2B	4	MF	downreg	CM
GO:0016247	channel regulator activity	1962-04-01	167/18737	0.0239521	7.23856	4.66595	0.00227167	0.0697303	0.0533118	KCNS3/LYNX1/FXYD6/SCN2B	4	MF	downreg	CM
GO:0141108	transporter regulator activity	1962-04-01	169/18737	0.0236686	7.15289	4.62961	0.00237182	0.0697303	0.0533118	KCNS3/LYNX1/FXYD6/SCN2B	4	MF	downreg	CM
GO:0005283	amino acid:sodium symporter activity	1962-02-01	23/18737	0.0869565	26.2791	6.9895	0.00260626	0.0697303	0.0533118	SLC6A1/SLC6A20	2	MF	downreg	CM
GO:0008081	phosphoric diester hydrolase activity	1962-03-01	87/18737	0.0344828	10.421	5.07484	0.00300111	0.0697303	0.0533118	ENPP3/PDE4C/PLCXD1	3	MF	downreg	CM
GO:0005251	delayed rectifier potassium channel activity	1962-02-01	25/18737	0.08	24.1768	6.68139	0.0030773	0.0697303	0.0533118	KCNA2/KCNS3	2	MF	downreg	CM
GO:0005249	voltage-gated potassium channel activity	1962-03-01	90/18737	0.0333333	10.0737	4.97168	0.00330301	0.0697303	0.0533118	KCNA2/KCNS3/SCN2B	3	MF	downreg	CM
GO:0005416	amino acid:monoatomic cation symporter activity	1962-02-01	29/18737	0.0689655	20.842	6.16135	0.00412936	0.0784579	0.0599844	SLC6A1/SLC6A20	2	MF	downreg	CM
GO:0005343	organic acid:sodium symporter activity	1962-02-01	35/18737	0.0571429	17.2691	5.55083	0.00597506	0.103206	0.0789051	SLC6A1/SLC6A20	2	MF	downreg	CM
GO:0005267	potassium channel activity	1962-03-01	116/18737	0.0258621	7.81577	4.24274	0.00670617	0.106181	0.08118	KCNA2/KCNS3/SCN2B	3	MF	downreg	CM
GO:0017080	sodium channel regulator activity	1962-02-01	41/18737	0.0487805	14.7419	5.07539	0.00813047	0.11883	0.0908506	FXYD6/SCN2B	2	MF	downreg	CM
GO:0030547	signaling receptor inhibitor activity	1962-02-01	43/18737	0.0465116	14.0563	4.93862	0.00891559	0.120997	0.0925076	LYPD6/LYNX1	2	MF	downreg	CM
GO:0022843	voltage-gated monoatomic cation channel activity	1962-03-01	135/18737	0.0222222	6.71577	3.84031	0.0101504	0.128571	0.0982983	KCNA2/KCNS3/SCN2B	3	MF	downreg	CM
GO:0035254	glutamate receptor binding	1962-02-01	48/18737	0.0416667	12.5921	4.63332	0.0110199	0.130861	0.100049	CAMK2A/SHANK2	2	MF	downreg	CM
GO:0015293	symporter activity	1962-03-01	147/18737	0.0204082	6.16754	3.62416	0.0127677	0.138434	0.105838	SLC6A1/SLC6A20/SLC22A18	3	MF	downreg	CM
GO:0015079	potassium ion transmembrane transporter activity	1962-03-01	152/18737	0.0197368	5.96466	3.54107	0.0139619	0.138434	0.105838	KCNA2/KCNS3/SCN2B	3	MF	downreg	CM
GO:0005216	monoatomic ion channel activity	1962-05-01	439/18737	0.0113895	3.44202	2.98321	0.0149671	0.138434	0.105838	KCNA2/KCNS3/SCN2B/P2RX7/OCA2	5	MF	downreg	CM
GO:0046873	metal ion transmembrane transporter activity	1962-05-01	444/18737	0.0112613	3.40326	2.95294	0.0156467	0.138434	0.105838	KCNA2/KCNS3/SLC6A1/SLC6A20/SCN2B	5	MF	downreg	CM
GO:0015081	sodium ion transmembrane transporter activity	1962-03-01	162/18737	0.0185185	5.59648	3.38549	0.0165356	0.138434	0.105838	SLC6A1/SLC6A20/SCN2B	3	MF	downreg	CM
GO:0005244	voltage-gated monoatomic ion channel activity	1962-03-01	164/18737	0.0182927	5.52823	3.35593	0.0170802	0.138434	0.105838	KCNA2/KCNS3/SCN2B	3	MF	downreg	CM
GO:0022832	voltage-gated channel activity	1962-03-01	166/18737	0.0180723	5.46162	3.32685	0.0176347	0.138434	0.105838	KCNA2/KCNS3/SCN2B	3	MF	downreg	CM
GO:0016279	protein-lysine N-methyltransferase activity	1962-02-01	62/18737	0.0322581	9.7487	3.97569	0.0179358	0.138434	0.105838	SMYD1/METTL21EP	2	MF	downreg	CM
GO:0016278	lysine N-methyltransferase activity	1962-02-01	63/18737	0.031746	9.59396	3.93685	0.0184849	0.138434	0.105838	SMYD1/METTL21EP	2	MF	downreg	CM
GO:0022836	gated channel activity	1962-04-01	308/18737	0.012987	3.9248	2.98212	0.0189435	0.138434	0.105838	KCNA2/KCNS3/SCN2B/P2RX7	4	MF	downreg	CM
GO:0005261	monoatomic cation channel activity	1962-04-01	333/18737	0.012012	3.63015	2.79029	0.0243982	0.171691	0.131265	KCNA2/KCNS3/SCN2B/P2RX7	4	MF	downreg	CM
GO:0015370	solute:sodium symporter activity	1962-02-01	79/18737	0.0253165	7.65088	3.41322	0.0281963	0.175308	0.13403	SLC6A1/SLC6A20	2	MF	downreg	CM
GO:0042578	phosphoric ester hydrolase activity	1962-04-01	363/18737	0.0110193	3.33013	2.58307	0.0320889	0.175308	0.13403	PLPPR4/ENPP3/PDE4C/PLCXD1	4	MF	downreg	CM
GO:0004955	prostaglandin receptor activity	1962-01-01	10/18737	0.1	30.221	5.32555	0.0326089	0.175308	0.13403	PTGDR	1	MF	downreg	CM
GO:0015658	branched-chain amino acid transmembrane transporter activity	1962-01-01	10/18737	0.1	30.221	5.32555	0.0326089	0.175308	0.13403	SLC6A20	1	MF	downreg	CM
GO:0047429	nucleoside triphosphate diphosphatase activity	1962-01-01	10/18737	0.1	30.221	5.32555	0.0326089	0.175308	0.13403	ENPP3	1	MF	downreg	CM
GO:0140999	histone H3K4 trimethyltransferase activity	1962-01-01	10/18737	0.1	30.221	5.32555	0.0326089	0.175308	0.13403	SMYD1	1	MF	downreg	CM
GO:1990763	arrestin family protein binding	1962-01-01	10/18737	0.1	30.221	5.32555	0.0326089	0.175308	0.13403	GPR61	1	MF	downreg	CM
GO:0004954	prostanoid receptor activity	1962-01-01	11/18737	0.0909091	27.4736	5.06047	0.0358117	0.175308	0.13403	PTGDR	1	MF	downreg	CM
GO:0032050	clathrin heavy chain binding	1962-01-01	11/18737	0.0909091	27.4736	5.06047	0.0358117	0.175308	0.13403	CEMIP	1	MF	downreg	CM
GO:0099508	voltage-gated monoatomic ion channel activity involved in regulation of presynaptic membrane potential	1962-01-01	11/18737	0.0909091	27.4736	5.06047	0.0358117	0.175308	0.13403	KCNA2	1	MF	downreg	CM
GO:1902282	voltage-gated potassium channel activity involved in ventricular cardiac muscle cell action potential repolarization	1962-01-01	12/18737	0.0833333	25.1841	4.82852	0.039004	0.175308	0.13403	SCN2B	1	MF	downreg	CM
GO:1990459	transferrin receptor binding	1962-01-01	12/18737	0.0833333	25.1841	4.82852	0.039004	0.175308	0.13403	HFE	1	MF	downreg	CM
GO:0008276	protein methyltransferase activity	1962-02-01	95/18737	0.0210526	6.36231	3.01906	0.0395152	0.175308	0.13403	SMYD1/METTL21EP	2	MF	downreg	CM
GO:0015651	quaternary ammonium group transmembrane transporter activity	1962-01-01	13/18737	0.0769231	23.2469	4.62323	0.042186	0.175308	0.13403	SLC6A20	1	MF	downreg	CM
GO:0039706	co-receptor binding	1962-01-01	13/18737	0.0769231	23.2469	4.62323	0.042186	0.175308	0.13403	HFE	1	MF	downreg	CM
GO:0120283	protein serine/threonine kinase binding	1962-01-01	13/18737	0.0769231	23.2469	4.62323	0.042186	0.175308	0.13403	CCDC102B	1	MF	downreg	CM
GO:0015171	amino acid transmembrane transporter activity	1962-02-01	99/18737	0.020202	6.10525	2.93453	0.0425739	0.175308	0.13403	SLC6A1/SLC6A20	2	MF	downreg	CM
GO:0008170	N-methyltransferase activity	1962-02-01	100/18737	0.02	6.04419	2.91412	0.0433522	0.175308	0.13403	SMYD1/METTL21EP	2	MF	downreg	CM
GO:0004867	serine-type endopeptidase inhibitor activity	1962-02-01	102/18737	0.0196078	5.92568	2.87412	0.0449245	0.175308	0.13403	ITIH5/CPAMD8	2	MF	downreg	CM
GO:0008195	phosphatidate phosphatase activity	1962-01-01	14/18737	0.0714286	21.5864	4.43977	0.0453575	0.175308	0.13403	PLPPR4	1	MF	downreg	CM
GO:0033130	acetylcholine receptor binding	1962-01-01	14/18737	0.0714286	21.5864	4.43977	0.0453575	0.175308	0.13403	LYNX1	1	MF	downreg	CM
GO:0086008	voltage-gated potassium channel activity involved in cardiac muscle cell action potential repolarization	1962-01-01	14/18737	0.0714286	21.5864	4.43977	0.0453575	0.175308	0.13403	SCN2B	1	MF	downreg	CM
GO:0004953	icosanoid receptor activity	1962-01-01	15/18737	0.0666667	20.1473	4.27446	0.0485188	0.175308	0.13403	PTGDR	1	MF	downreg	CM
GO:0015929	hexosaminidase activity	1962-01-01	15/18737	0.0666667	20.1473	4.27446	0.0485188	0.175308	0.13403	CEMIP	1	MF	downreg	CM
GO:0140161	monocarboxylate:sodium symporter activity	1962-01-01	15/18737	0.0666667	20.1473	4.27446	0.0485188	0.175308	0.13403	SLC6A1	1	MF	downreg	CM
GO:0043194	axon initial segment	1965-03-01	23/19960	0.130435	40.0535	10.7114	5.57182e-05	0.00757767	0.00662753	KCNA2/NFASC/SCN2B	3	CC	downreg	CM
GO:0045211	postsynaptic membrane	1965-06-01	321/19960	0.0186916	5.73976	4.89331	0.000614471	0.041784	0.0365448	PLPPR4/KCNA2/SLC6A1/SORCS3/SHANK2/FXYD6	6	CC	downreg	CM
GO:0044304	main axon	1965-03-01	73/19960	0.0410959	12.6196	5.68489	0.00174242	0.0649516	0.0568075	KCNA2/NFASC/SCN2B	3	CC	downreg	CM
GO:0033268	node of Ranvier	1965-02-01	20/19960	0.1	30.7077	7.59758	0.00191034	0.0649516	0.0568075	NFASC/SCN2B	2	CC	downreg	CM
GO:0097060	synaptic membrane	1965-06-01	453/19960	0.013245	4.06724	3.77447	0.00352738	0.0959447	0.0839145	PLPPR4/KCNA2/SLC6A1/SORCS3/SHANK2/FXYD6	6	CC	downreg	CM
GO:0045177	apical part of cell	1965-06-01	474/19960	0.0126582	3.88705	3.6361	0.00439762	0.0996794	0.0871809	EDAR/SLC6A20/HFE/ENPP3/SLC22A18/SHANK2	6	CC	downreg	CM
GO:0034703	cation channel complex	1965-04-01	228/19960	0.0175439	5.38731	3.80833	0.00651514	0.12658	0.110708	KCNA2/KCNS3/C2CD6/SCN2B	4	CC	downreg	CM
GO:0042734	presynaptic membrane	1965-03-01	186/19960	0.016129	4.95285	3.09581	0.0228054	0.292778	0.256067	KCNA2/SLC6A1/FXYD6	3	CC	downreg	CM
GO:0014069	postsynaptic density	1965-04-01	359/19960	0.0111421	3.42147	2.64631	0.0295363	0.292778	0.256067	PLPPR4/CAMK2A/SORCS3/SHANK2	4	CC	downreg	CM
GO:0034702	monoatomic ion channel complex	1965-04-01	365/19960	0.0109589	3.36523	2.60676	0.0311214	0.292778	0.256067	KCNA2/KCNS3/C2CD6/SCN2B	4	CC	downreg	CM
GO:0032279	asymmetric synapse	1965-04-01	375/19960	0.0106667	3.27549	2.54263	0.0338736	0.292778	0.256067	PLPPR4/CAMK2A/SORCS3/SHANK2	4	CC	downreg	CM
GO:0008076	voltage-gated potassium channel complex	1965-02-01	90/19960	0.0222222	6.82393	3.16514	0.0348091	0.292778	0.256067	KCNA2/KCNS3	2	CC	downreg	CM
GO:0005883	neurofilament	1965-01-01	11/19960	0.0909091	27.9161	5.1039	0.0352527	0.292778	0.256067	SHANK2	1	CC	downreg	CM
GO:0030017	sarcomere	1965-03-01	222/19960	0.0135135	4.14969	2.69741	0.0358229	0.292778	0.256067	KY/ADPRHL1/FHOD3	3	CC	downreg	CM
GO:0044224	juxtaparanode region of axon	1965-01-01	12/19960	0.0833333	25.5897	4.87023	0.0383962	0.292778	0.256067	KCNA2	1	CC	downreg	CM
GO:0099572	postsynaptic specialization	1965-04-01	396/19960	0.010101	3.10179	2.41469	0.0401049	0.292778	0.256067	PLPPR4/CAMK2A/SORCS3/SHANK2	4	CC	downreg	CM
GO:0034705	potassium channel complex	1965-02-01	101/19960	0.019802	6.08073	2.92592	0.0429078	0.292778	0.256067	KCNA2/KCNS3	2	CC	downreg	CM
GO:0016324	apical plasma membrane	1965-04-01	408/19960	0.00980392	3.01056	2.34534	0.0439416	0.292778	0.256067	SLC6A20/ENPP3/SLC22A18/SHANK2	4	CC	downreg	CM
GO:0036128	CatSper complex	1965-01-01	14/19960	0.0714286	21.9341	4.47862	0.0446528	0.292778	0.256067	C2CD6	1	CC	downreg	CM
GO:0030016	myofibril	1965-03-01	243/19960	0.0123457	3.79107	2.50212	0.044852	0.292778	0.256067	KY/ADPRHL1/FHOD3	3	CC	downreg	CM
GO:0098984	neuron to neuron synapse	1965-04-01	412/19960	0.00970874	2.98133	2.32278	0.0452652	0.292778	0.256067	PLPPR4/CAMK2A/SORCS3/SHANK2	4	CC	downreg	CM
GO:0001518	voltage-gated sodium channel complex	1965-01-01	15/19960	0.0666667	20.4718	4.3121	0.0477661	0.292778	0.256067	SCN2B	1	CC	downreg	CM
GO:0043292	contractile muscle fiber	1965-03-01	253/19960	0.0118577	3.64123	2.41663	0.0495139	0.292778	0.256067	KY/ADPRHL1/FHOD3	3	CC	downreg	CM
GO:0034728	nucleosome organization	1959-10-01	140/18986	0.0714286	22.9855	14.5774	1.58611e-11	2.28559e-08	1.95676e-08	H2AC25/H3C1/H2BC4/H2BC6/H2BC8/H1-3/H2BC11/H2BC13/H3C10/H3C12	10	BP	upreg	Macrophage
GO:0006334	nucleosome assembly	1959-09-01	120/18986	0.075	24.1347	14.194	1.14463e-10	8.24706e-08	7.06056e-08	H3C1/H2BC4/H2BC6/H2BC8/H1-3/H2BC11/H2BC13/H3C10/H3C12	9	BP	upreg	Macrophage
GO:0071824	protein-DNA complex organization	1959-10-01	262/18986	0.0381679	12.2823	10.2669	7.31529e-09	3.51378e-06	3.00825e-06	H2AC25/H3C1/H2BC4/H2BC6/H2BC8/H1-3/H2BC11/H2BC13/H3C10/H3C12	10	BP	upreg	Macrophage
GO:0065004	protein-DNA complex assembly	1959-09-01	242/18986	0.0371901	11.9676	9.58695	5.52319e-08	1.98973e-05	1.70347e-05	H3C1/H2BC4/H2BC6/H2BC8/H1-3/H2BC11/H2BC13/H3C10/H3C12	9	BP	upreg	Macrophage
GO:0040029	epigenetic regulation of gene expression	1959-09-01	295/18986	0.0305085	9.81752	8.52181	2.97266e-07	8.56721e-05	7.33465e-05	H2AC25/H3C1/H2AC6/H2AC7/H2AC8/H2AC11/H3C10/H2AC15/H3C12	9	BP	upreg	Macrophage
GO:0002227	innate immune response in mucosa	1959-04-01	28/18986	0.142857	45.9709	13.2955	1.62853e-06	0.000391119	0.000334849	H2BC4/H2BC6/H2BC8/H2BC11	4	BP	upreg	Macrophage
GO:0051085	chaperone cofactor-dependent protein refolding	1959-04-01	32/18986	0.125	40.2246	12.3986	2.83378e-06	0.000553224	0.000473632	DNAJB4/HSPE1/HSPA5/HSPH1	4	BP	upreg	Macrophage
GO:0050830	defense response to Gram-positive bacterium	1959-06-01	130/18986	0.0461538	14.8522	8.84819	3.07133e-06	0.000553224	0.000473632	H2BC4/H2BC6/H2BC8/H2BC11/TAC1/RIPK2	6	BP	upreg	Macrophage
GO:0019731	antibacterial humoral response	1959-05-01	79/18986	0.0632911	20.3669	9.63057	4.60741e-06	0.000737698	0.000631566	H2BC4/H2BC6/H2BC8/H2BC11/TAC1	5	BP	upreg	Macrophage
GO:0002385	mucosal immune response	1959-04-01	40/18986	0.1	32.1797	11.0213	7.06962e-06	0.00101873	0.000872168	H2BC4/H2BC6/H2BC8/H2BC11	4	BP	upreg	Macrophage
GO:0002251	organ or tissue specific immune response	1959-04-01	44/18986	0.0909091	29.2542	10.4758	1.04044e-05	0.00116683	0.000998963	H2BC4/H2BC6/H2BC8/H2BC11	4	BP	upreg	Macrophage
GO:0051084	'de novo' post-translational protein folding	1959-04-01	44/18986	0.0909091	29.2542	10.4758	1.04044e-05	0.00116683	0.000998963	DNAJB4/HSPE1/HSPA5/HSPH1	4	BP	upreg	Macrophage
GO:0031507	heterochromatin formation	1959-06-01	161/18986	0.0372671	11.9924	7.8204	1.05266e-05	0.00116683	0.000998963	H2AC25/H2AC6/H2AC7/H2AC8/H2AC11/H2AC15	6	BP	upreg	Macrophage
GO:0006458	'de novo' protein folding	1959-04-01	49/18986	0.0816327	26.2691	9.88833	1.6052e-05	0.00165221	0.0014145	DNAJB4/HSPE1/HSPA5/HSPH1	4	BP	upreg	Macrophage
GO:0045814	negative regulation of gene expression, epigenetic	1959-06-01	192/18986	0.03125	10.0561	7.04165	2.85488e-05	0.00274258	0.00234801	H2AC25/H2AC6/H2AC7/H2AC8/H2AC11/H2AC15	6	BP	upreg	Macrophage
GO:0061844	antimicrobial humoral immune response mediated by antimicrobial peptide	1959-05-01	136/18986	0.0367647	11.8308	7.07723	6.42932e-05	0.00579041	0.00495735	H2BC4/H2BC6/H2BC8/H2BC11/TAC1	5	BP	upreg	Macrophage
GO:0006986	response to unfolded protein	1959-05-01	143/18986	0.034965	11.2516	6.87031	8.15751e-05	0.00691469	0.00591988	DNAJB4/HSPE1/HSPA5/BAG3/HSPH1	5	BP	upreg	Macrophage
GO:0061077	chaperone-mediated protein folding	1959-04-01	76/18986	0.0526316	16.9367	7.77229	9.13144e-05	0.00731022	0.00625851	DNAJB4/HSPE1/HSPA5/HSPH1	4	BP	upreg	Macrophage
GO:0035966	response to topologically incorrect protein	1959-05-01	160/18986	0.03125	10.0561	6.42266	0.000138456	0.0104862	0.00897755	DNAJB4/HSPE1/HSPA5/BAG3/HSPH1	5	BP	upreg	Macrophage
GO:0050869	negative regulation of B cell activation	1959-03-01	33/18986	0.0909091	29.2542	9.06968	0.00014554	0.0104862	0.00897755	ID2/INHBA/SAMSN1	3	BP	upreg	Macrophage
GO:0019730	antimicrobial humoral response	1959-05-01	185/18986	0.027027	8.69721	5.8738	0.000272049	0.0186678	0.015982	H2BC4/H2BC6/H2BC8/H2BC11/TAC1	5	BP	upreg	Macrophage
GO:0042742	defense response to bacterium	1959-06-01	342/18986	0.0175439	5.64555	4.84029	0.000659581	0.0432025	0.036987	H2BC4/H2BC6/H2BC8/H2BC11/TAC1/RIPK2	6	BP	upreg	Macrophage
GO:0006457	protein folding	1959-05-01	231/18986	0.021645	6.96529	5.09295	0.000748924	0.0469217	0.0401711	DNAJB4/HSPE1/HSPA5/BAG3/HSPH1	5	BP	upreg	Macrophage
GO:0042541	hemoglobin biosynthetic process	1959-02-01	14/18986	0.142857	45.9709	9.39788	0.000843426	0.0506407	0.0433551	INHBA/HIF1A	2	BP	upreg	Macrophage
GO:0030728	ovulation	1959-02-01	16/18986	0.125	40.2246	8.76345	0.00110777	0.0638521	0.0546657	INHBA/ADAMTS1	2	BP	upreg	Macrophage
GO:0060644	mammary gland epithelial cell differentiation	1959-02-01	17/18986	0.117647	37.8584	8.48847	0.00125297	0.0694436	0.0594528	ID2/HIF1A	2	BP	upreg	Macrophage
GO:0061644	protein localization to CENP-A containing chromatin	1959-02-01	18/18986	0.111111	35.7552	8.23636	0.00140678	0.0729401	0.0624462	H2AC8/H2BC11	2	BP	upreg	Macrophage
GO:0020027	hemoglobin metabolic process	1959-02-01	19/18986	0.105263	33.8733	8.00408	0.00156915	0.0729401	0.0624462	INHBA/HIF1A	2	BP	upreg	Macrophage
GO:0051132	NK T cell activation	1959-02-01	19/18986	0.105263	33.8733	8.00408	0.00156915	0.0729401	0.0624462	CLEC2B/HSPH1	2	BP	upreg	Macrophage
GO:0060749	mammary gland alveolus development	1959-02-01	19/18986	0.105263	33.8733	8.00408	0.00156915	0.0729401	0.0624462	ID2/HIF1A	2	BP	upreg	Macrophage
GO:0061377	mammary gland lobule development	1959-02-01	19/18986	0.105263	33.8733	8.00408	0.00156915	0.0729401	0.0624462	ID2/HIF1A	2	BP	upreg	Macrophage
GO:0009266	response to temperature stimulus	1959-04-01	176/18986	0.0227273	7.31356	4.69815	0.00218359	0.09833	0.0841833	DNAJB4/IER5/TAC1/BAG3	4	BP	upreg	Macrophage
GO:0006959	humoral immune response	1959-05-01	310/18986	0.016129	5.19027	4.15309	0.00273667	0.119501	0.102309	H2BC4/H2BC6/H2BC8/H2BC11/TAC1	5	BP	upreg	Macrophage
GO:0046716	muscle cell cellular homeostasis	1959-02-01	26/18986	0.0769231	24.7536	6.76686	0.00294094	0.124644	0.106711	BAG3/HIF1A	2	BP	upreg	Macrophage
GO:0045649	regulation of macrophage differentiation	1959-02-01	27/18986	0.0740741	23.8368	6.62979	0.00316989	0.128946	0.110394	ID2/INHBA	2	BP	upreg	Macrophage
GO:0016239	positive regulation of macroautophagy	1959-03-01	95/18986	0.0315789	10.162	4.99822	0.00322141	0.128946	0.110394	RIPK2/BAG3/HIF1A	3	BP	upreg	Macrophage
GO:0046330	positive regulation of JNK cascade	1959-03-01	97/18986	0.0309278	9.95247	4.93531	0.00341644	0.133056	0.113914	SDCBP/RIPK2/GADD45B	3	BP	upreg	Macrophage
GO:0060485	mesenchyme development	1959-05-01	341/18986	0.0146628	4.71843	3.86853	0.00410985	0.15585	0.133428	KBTBD8/BASP1/SOX4/SDCBP/HIF1A	5	BP	upreg	Macrophage
GO:0009408	response to heat	1959-03-01	106/18986	0.0283019	9.10745	4.67333	0.00438301	0.161946	0.138647	DNAJB4/IER5/BAG3	3	BP	upreg	Macrophage
GO:0045639	positive regulation of myeloid cell differentiation	1959-03-01	107/18986	0.0280374	9.02233	4.64615	0.00449958	0.162097	0.138776	ID2/INHBA/HIF1A	3	BP	upreg	Macrophage
GO:0045648	positive regulation of erythrocyte differentiation	1959-02-01	33/18986	0.0606061	19.5028	5.93945	0.00471173	0.1656	0.141775	INHBA/HIF1A	2	BP	upreg	Macrophage
GO:0045619	regulation of lymphocyte differentiation	1959-04-01	223/18986	0.0179372	5.77214	4.00225	0.00508956	0.174621	0.149498	ID2/SOX4/INHBA/RIPK2	4	BP	upreg	Macrophage
GO:0045577	regulation of B cell differentiation	1959-02-01	35/18986	0.0571429	18.3884	5.74867	0.00528852	0.177227	0.151729	ID2/INHBA	2	BP	upreg	Macrophage
GO:0045926	negative regulation of growth	1959-04-01	232/18986	0.0172414	5.54822	3.8916	0.00584687	0.191485	0.163936	INHBA/IFRD1/ING1/HIF1A	4	BP	upreg	Macrophage
GO:0010934	macrophage cytokine production	1959-02-01	38/18986	0.0526316	16.9367	5.49032	0.00621128	0.194575	0.166582	UBE2J1/RIPK2	2	BP	upreg	Macrophage
GO:0010935	regulation of macrophage cytokine production	1959-02-01	38/18986	0.0526316	16.9367	5.49032	0.00621128	0.194575	0.166582	UBE2J1/RIPK2	2	BP	upreg	Macrophage
GO:0071459	protein localization to chromosome, centromeric region	1959-02-01	41/18986	0.0487805	15.6974	5.25988	0.00720194	0.220809	0.189041	H2AC8/H2BC11	2	BP	upreg	Macrophage
GO:1903320	regulation of protein modification by small protein conjugation or removal	1959-04-01	248/18986	0.016129	5.19027	3.70848	0.00737252	0.221329	0.189487	SOX4/RIPK2/HSPA5/HIF1A	4	BP	upreg	Macrophage
GO:0003206	cardiac chamber morphogenesis	1959-03-01	129/18986	0.0232558	7.48364	4.12542	0.00755099	0.222061	0.190113	SOX4/HIF1A/ADAMTS1	3	BP	upreg	Macrophage
GO:1901873	regulation of post-translational protein modification	1959-04-01	253/18986	0.0158103	5.08769	3.65448	0.00789838	0.227216	0.194526	SOX4/RIPK2/HSPA5/HIF1A	4	BP	upreg	Macrophage
GO:0098773	skin epidermis development	1959-03-01	132/18986	0.0227273	7.31356	4.06396	0.00804163	0.227216	0.194526	FOXQ1/INHBA/UGCG	3	BP	upreg	Macrophage
GO:0050864	regulation of B cell activation	1959-03-01	133/18986	0.0225564	7.25857	4.04391	0.00820927	0.227491	0.194762	ID2/INHBA/SAMSN1	3	BP	upreg	Macrophage
GO:0050870	positive regulation of T cell activation	1959-04-01	260/18986	0.0153846	4.95072	3.58122	0.00867528	0.231601	0.19828	SOX4/RIPK2/HSPH1/CD70	4	BP	upreg	Macrophage
GO:0021762	substantia nigra development	1959-02-01	46/18986	0.0434783	13.9912	4.92524	0.00900044	0.231601	0.19828	BASP1/HSPA5	2	BP	upreg	Macrophage
GO:0045047	protein targeting to ER	1959-02-01	46/18986	0.0434783	13.9912	4.92524	0.00900044	0.231601	0.19828	ZFAND2A/HSPA5	2	BP	upreg	Macrophage
GO:0045646	regulation of erythrocyte differentiation	1959-02-01	46/18986	0.0434783	13.9912	4.92524	0.00900044	0.231601	0.19828	INHBA/HIF1A	2	BP	upreg	Macrophage
GO:0030218	erythrocyte differentiation	1959-03-01	139/18986	0.0215827	6.94525	3.92778	0.00925841	0.234059	0.200385	ID2/INHBA/HIF1A	3	BP	upreg	Macrophage
GO:0046328	regulation of JNK cascade	1959-03-01	140/18986	0.0214286	6.89564	3.90909	0.00944054	0.234549	0.200804	SDCBP/RIPK2/GADD45B	3	BP	upreg	Macrophage
GO:0048546	digestive tract morphogenesis	1959-02-01	49/18986	0.0408163	13.1346	4.7485	0.0101659	0.241156	0.206461	ID2/HIF1A	2	BP	upreg	Macrophage
GO:0022602	ovulation cycle process	1959-02-01	50/18986	0.04	12.8719	4.693	0.0105685	0.241156	0.206461	INHBA/ADAMTS1	2	BP	upreg	Macrophage
GO:0061082	myeloid leukocyte cytokine production	1959-02-01	50/18986	0.04	12.8719	4.693	0.0105685	0.241156	0.206461	UBE2J1/RIPK2	2	BP	upreg	Macrophage
GO:0072599	establishment of protein localization to endoplasmic reticulum	1959-02-01	50/18986	0.04	12.8719	4.693	0.0105685	0.241156	0.206461	ZFAND2A/HSPA5	2	BP	upreg	Macrophage
GO:0046887	positive regulation of hormone secretion	1959-03-01	147/18986	0.0204082	6.56728	3.78323	0.0107742	0.241156	0.206461	SOX4/INHBA/HIF1A	3	BP	upreg	Macrophage
GO:0071333	cellular response to glucose stimulus	1959-03-01	148/18986	0.0202703	6.5229	3.76592	0.0109732	0.241156	0.206461	TRA2B/SOX4/HIF1A	3	BP	upreg	Macrophage
GO:1903706	regulation of hemopoiesis	1959-05-01	433/18986	0.0115473	3.7159	3.19184	0.0110037	0.241156	0.206461	ID2/SOX4/INHBA/RIPK2/HIF1A	5	BP	upreg	Macrophage
GO:0021537	telencephalon development	1959-04-01	281/18986	0.0142349	4.58073	3.37627	0.011302	0.241156	0.206461	ID2/TRA2B/INHBA/HIF1A	4	BP	upreg	Macrophage
GO:0034101	erythrocyte homeostasis	1959-03-01	150/18986	0.02	6.43593	3.73178	0.0113775	0.241156	0.206461	ID2/INHBA/HIF1A	3	BP	upreg	Macrophage
GO:0071331	cellular response to hexose stimulus	1959-03-01	151/18986	0.0198675	6.39331	3.71494	0.0115829	0.241156	0.206461	TRA2B/SOX4/HIF1A	3	BP	upreg	Macrophage
GO:0042113	B cell activation	1959-04-01	284/18986	0.0140845	4.53235	3.34864	0.0117147	0.241156	0.206461	ID2/INHBA/CD70/SAMSN1	4	BP	upreg	Macrophage
GO:1903039	positive regulation of leukocyte cell-cell adhesion	1959-04-01	284/18986	0.0140845	4.53235	3.34864	0.0117147	0.241156	0.206461	SOX4/RIPK2/HSPH1/CD70	4	BP	upreg	Macrophage
GO:0071326	cellular response to monosaccharide stimulus	1959-03-01	153/18986	0.0196078	6.30974	3.68171	0.0120001	0.243551	0.208511	TRA2B/SOX4/HIF1A	3	BP	upreg	Macrophage
GO:1904752	regulation of vascular associated smooth muscle cell migration	1959-02-01	54/18986	0.037037	11.9184	4.48588	0.0122482	0.245134	0.209867	GNA13/ADAMTS1	2	BP	upreg	Macrophage
GO:1904738	vascular associated smooth muscle cell migration	1959-02-01	56/18986	0.0357143	11.4927	4.39034	0.013129	0.256136	0.219286	GNA13/ADAMTS1	2	BP	upreg	Macrophage
GO:1903532	positive regulation of secretion by cell	1959-04-01	298/18986	0.0134228	4.31942	3.22462	0.013769	0.256136	0.219286	SOX4/INHBA/SDCBP/HIF1A	4	BP	upreg	Macrophage
GO:0071322	cellular response to carbohydrate stimulus	1959-03-01	163/18986	0.0184049	5.92264	3.52401	0.0142151	0.256136	0.219286	TRA2B/SOX4/HIF1A	3	BP	upreg	Macrophage
GO:0010508	positive regulation of autophagy	1959-03-01	166/18986	0.0180723	5.8156	3.47925	0.0149219	0.256136	0.219286	RIPK2/BAG3/HIF1A	3	BP	upreg	Macrophage
GO:0001961	positive regulation of cytokine-mediated signaling pathway	1959-02-01	61/18986	0.0327869	10.5507	4.17131	0.0154477	0.256136	0.219286	RIPK2/HIF1A	2	BP	upreg	Macrophage
GO:0071168	protein localization to chromatin	1959-02-01	61/18986	0.0327869	10.5507	4.17131	0.0154477	0.256136	0.219286	H2AC8/H2BC11	2	BP	upreg	Macrophage
GO:0051250	negative regulation of lymphocyte activation	1959-03-01	169/18986	0.0177515	5.71237	3.43556	0.0156484	0.256136	0.219286	ID2/INHBA/SAMSN1	3	BP	upreg	Macrophage
GO:0001678	intracellular glucose homeostasis	1959-03-01	170/18986	0.0176471	5.67876	3.42123	0.0158949	0.256136	0.219286	TRA2B/SOX4/HIF1A	3	BP	upreg	Macrophage
GO:0045620	negative regulation of lymphocyte differentiation	1959-02-01	62/18986	0.0322581	10.3805	4.13055	0.0159311	0.256136	0.219286	ID2/INHBA	2	BP	upreg	Macrophage
GO:0003205	cardiac chamber development	1959-03-01	172/18986	0.0174419	5.61273	3.39291	0.0163945	0.256136	0.219286	SOX4/HIF1A/ADAMTS1	3	BP	upreg	Macrophage
GO:0030308	negative regulation of cell growth	1959-03-01	173/18986	0.017341	5.58029	3.37891	0.0166477	0.256136	0.219286	INHBA/IFRD1/ING1	3	BP	upreg	Macrophage
GO:0048660	regulation of smooth muscle cell proliferation	1959-03-01	174/18986	0.0172414	5.54822	3.36503	0.016903	0.256136	0.219286	ID2/GNA13/ADAMTS1	3	BP	upreg	Macrophage
GO:0097192	extrinsic apoptotic signaling pathway in absence of ligand	1959-02-01	65/18986	0.0307692	9.90143	4.01361	0.0174197	0.256136	0.219286	INHBA/BAG3	2	BP	upreg	Macrophage
GO:0007254	JNK cascade	1959-03-01	177/18986	0.0169492	5.45418	3.32401	0.0176821	0.256136	0.219286	SDCBP/RIPK2/GADD45B	3	BP	upreg	Macrophage
GO:0051047	positive regulation of secretion	1959-04-01	322/18986	0.0124224	3.99747	3.02881	0.0177992	0.256136	0.219286	SOX4/INHBA/SDCBP/HIF1A	4	BP	upreg	Macrophage
GO:0048659	smooth muscle cell proliferation	1959-03-01	178/18986	0.0168539	5.42354	3.31054	0.0179462	0.256136	0.219286	ID2/GNA13/ADAMTS1	3	BP	upreg	Macrophage
GO:0038034	signal transduction in absence of ligand	1959-02-01	67/18986	0.0298507	9.60587	3.93979	0.0184438	0.256136	0.219286	INHBA/BAG3	2	BP	upreg	Macrophage
GO:0017015	regulation of transforming growth factor beta receptor signaling pathway	1959-03-01	180/18986	0.0166667	5.36328	3.28391	0.0184811	0.256136	0.219286	SDCBP/HSPA5/ING1	3	BP	upreg	Macrophage
GO:0090092	regulation of transmembrane receptor protein serine/threonine kinase signaling pathway	1959-04-01	326/18986	0.0122699	3.94842	2.99801	0.0185352	0.256136	0.219286	INHBA/SDCBP/HSPA5/ING1	4	BP	upreg	Macrophage
GO:0060760	positive regulation of response to cytokine stimulus	1959-02-01	68/18986	0.0294118	9.46461	3.90404	0.0189652	0.256136	0.219286	RIPK2/HIF1A	2	BP	upreg	Macrophage
GO:0002262	myeloid cell homeostasis	1959-03-01	183/18986	0.0163934	5.27535	3.2447	0.0193	0.256136	0.219286	ID2/INHBA/HIF1A	3	BP	upreg	Macrophage
GO:1903844	regulation of cellular response to transforming growth factor beta stimulus	1959-03-01	183/18986	0.0163934	5.27535	3.2447	0.0193	0.256136	0.219286	SDCBP/HSPA5/ING1	3	BP	upreg	Macrophage
GO:0030225	macrophage differentiation	1959-02-01	69/18986	0.0289855	9.32744	3.86901	0.0194928	0.256136	0.219286	ID2/INHBA	2	BP	upreg	Macrophage
GO:0034605	cellular response to heat	1959-02-01	69/18986	0.0289855	9.32744	3.86901	0.0194928	0.256136	0.219286	IER5/BAG3	2	BP	upreg	Macrophage
GO:0048857	neural nucleus development	1959-02-01	69/18986	0.0289855	9.32744	3.86901	0.0194928	0.256136	0.219286	BASP1/HSPA5	2	BP	upreg	Macrophage
GO:0061180	mammary gland epithelium development	1959-02-01	69/18986	0.0289855	9.32744	3.86901	0.0194928	0.256136	0.219286	ID2/HIF1A	2	BP	upreg	Macrophage
GO:0001959	regulation of cytokine-mediated signaling pathway	1959-03-01	187/18986	0.0160428	5.16251	3.19374	0.0204228	0.256136	0.219286	H2BC11/RIPK2/HIF1A	3	BP	upreg	Macrophage
GO:0022409	positive regulation of cell-cell adhesion	1959-04-01	336/18986	0.0119048	3.83091	2.92312	0.0204577	0.256136	0.219286	SOX4/RIPK2/HSPH1/CD70	4	BP	upreg	Macrophage
GO:0051251	positive regulation of lymphocyte activation	1959-04-01	336/18986	0.0119048	3.83091	2.92312	0.0204577	0.256136	0.219286	SOX4/RIPK2/HSPH1/CD70	4	BP	upreg	Macrophage
GO:0003208	cardiac ventricle morphogenesis	1959-02-01	71/18986	0.028169	9.06469	3.80106	0.0205664	0.256136	0.219286	SOX4/HIF1A	2	BP	upreg	Macrophage
GO:1902105	regulation of leukocyte differentiation	1959-04-01	337/18986	0.0118694	3.81954	2.91579	0.0206565	0.256136	0.219286	ID2/SOX4/INHBA/RIPK2	4	BP	upreg	Macrophage
GO:0048872	homeostasis of number of cells	1959-04-01	339/18986	0.0117994	3.79701	2.90121	0.0210576	0.256136	0.219286	ID2/SOX4/INHBA/HIF1A	4	BP	upreg	Macrophage
GO:0008217	regulation of blood pressure	1959-03-01	190/18986	0.0157895	5.081	3.15647	0.0212881	0.256136	0.219286	ID2/TAC1/GNA13	3	BP	upreg	Macrophage
GO:0006694	steroid biosynthetic process	1959-03-01	191/18986	0.0157068	5.0544	3.14421	0.021581	0.256136	0.219286	STARD4/INHBA/SDR42E2	3	BP	upreg	Macrophage
GO:0016241	regulation of macroautophagy	1959-03-01	191/18986	0.0157068	5.0544	3.14421	0.021581	0.256136	0.219286	RIPK2/BAG3/HIF1A	3	BP	upreg	Macrophage
GO:2000045	regulation of G1/S transition of mitotic cell cycle	1959-03-01	191/18986	0.0157068	5.0544	3.14421	0.021581	0.256136	0.219286	ID2/INHBA/ADAMTS1	3	BP	upreg	Macrophage
GO:0032722	positive regulation of chemokine production	1959-02-01	73/18986	0.0273973	8.81635	3.73573	0.0216642	0.256136	0.219286	RIPK2/HIF1A	2	BP	upreg	Macrophage
GO:0042698	ovulation cycle	1959-02-01	73/18986	0.0273973	8.81635	3.73573	0.0216642	0.256136	0.219286	INHBA/ADAMTS1	2	BP	upreg	Macrophage
GO:0001837	epithelial to mesenchymal transition	1959-03-01	192/18986	0.015625	5.02807	3.13205	0.0218761	0.256136	0.219286	KBTBD8/SDCBP/HIF1A	3	BP	upreg	Macrophage
GO:0032200	telomere organization	1959-03-01	193/18986	0.015544	5.00202	3.11997	0.0221734	0.256136	0.219286	H3C1/H3C10/H3C12	3	BP	upreg	Macrophage
GO:0052547	regulation of peptidase activity	1959-04-01	346/18986	0.0115607	3.72019	2.85105	0.0224994	0.256136	0.219286	HSPE1/RARRES1/RIPK2/SERPINA3	4	BP	upreg	Macrophage
GO:1902107	positive regulation of leukocyte differentiation	1959-03-01	195/18986	0.0153846	4.95072	3.09606	0.0227747	0.256136	0.219286	ID2/SOX4/RIPK2	3	BP	upreg	Macrophage
GO:1903708	positive regulation of hemopoiesis	1959-03-01	195/18986	0.0153846	4.95072	3.09606	0.0227747	0.256136	0.219286	ID2/SOX4/RIPK2	3	BP	upreg	Macrophage
GO:0046635	positive regulation of alpha-beta T cell activation	1959-02-01	75/18986	0.0266667	8.58124	3.67286	0.0227859	0.256136	0.219286	RIPK2/HSPH1	2	BP	upreg	Macrophage
GO:0002695	negative regulation of leukocyte activation	1959-03-01	196/18986	0.0153061	4.92546	3.08422	0.0230787	0.256136	0.219286	ID2/INHBA/SAMSN1	3	BP	upreg	Macrophage
GO:0046631	alpha-beta T cell activation	1959-03-01	196/18986	0.0153061	4.92546	3.08422	0.0230787	0.256136	0.219286	RIPK2/CLEC2B/HSPH1	3	BP	upreg	Macrophage
GO:0060759	regulation of response to cytokine stimulus	1959-03-01	199/18986	0.0150754	4.85121	3.04919	0.0240039	0.256136	0.219286	H2BC11/RIPK2/HIF1A	3	BP	upreg	Macrophage
GO:0014032	neural crest cell development	1959-02-01	80/18986	0.025	8.04492	3.52542	0.0256927	0.256136	0.219286	KBTBD8/HIF1A	2	BP	upreg	Macrophage
GO:0031396	regulation of protein ubiquitination	1959-03-01	205/18986	0.0146341	4.70922	2.9812	0.0259142	0.256136	0.219286	SOX4/RIPK2/HSPA5	3	BP	upreg	Macrophage
GO:0009749	response to glucose	1959-03-01	206/18986	0.0145631	4.68636	2.97012	0.0262404	0.256136	0.219286	TRA2B/SOX4/HIF1A	3	BP	upreg	Macrophage
GO:0030705	cytoskeleton-dependent intracellular transport	1959-03-01	208/18986	0.0144231	4.6413	2.94818	0.0268993	0.256136	0.219286	BAG3/TUBA1C/HIF1A	3	BP	upreg	Macrophage
GO:0070972	protein localization to endoplasmic reticulum	1959-02-01	83/18986	0.0240964	7.75414	3.44297	0.0275055	0.256136	0.219286	ZFAND2A/HSPA5	2	BP	upreg	Macrophage
GO:0009746	response to hexose	1959-03-01	211/18986	0.014218	4.57531	2.91578	0.0279044	0.256136	0.219286	TRA2B/SOX4/HIF1A	3	BP	upreg	Macrophage
GO:0002696	positive regulation of leukocyte activation	1959-04-01	371/18986	0.0107817	3.46951	2.68198	0.0281359	0.256136	0.219286	SOX4/RIPK2/HSPH1/CD70	4	BP	upreg	Macrophage
GO:0016236	macroautophagy	1959-04-01	372/18986	0.0107527	3.46018	2.67552	0.0283774	0.256136	0.219286	RIPK2/BAG3/GABARAPL1/HIF1A	4	BP	upreg	Macrophage
GO:0048864	stem cell development	1959-02-01	86/18986	0.0232558	7.48364	3.36456	0.0293684	0.256136	0.219286	KBTBD8/HIF1A	2	BP	upreg	Macrophage
GO:0034284	response to monosaccharide	1959-03-01	218/18986	0.0137615	4.42839	2.8425	0.0303268	0.256136	0.219286	TRA2B/SOX4/HIF1A	3	BP	upreg	Macrophage
GO:0090287	regulation of cellular response to growth factor stimulus	1959-04-01	381/18986	0.0104987	3.37844	2.61837	0.0306069	0.256136	0.219286	SDCBP/HSPA5/ING1/HIF1A	4	BP	upreg	Macrophage
GO:0032024	positive regulation of insulin secretion	1959-02-01	88/18986	0.0227273	7.31356	3.31435	0.0306377	0.256136	0.219286	SOX4/HIF1A	2	BP	upreg	Macrophage
GO:0002246	wound healing involved in inflammatory response	1959-01-01	10/18986	0.1	32.1797	5.50629	0.0306517	0.256136	0.219286	HIF1A	1	BP	upreg	Macrophage
GO:0033210	leptin-mediated signaling pathway	1959-01-01	10/18986	0.1	32.1797	5.50629	0.0306517	0.256136	0.219286	UGCG	1	BP	upreg	Macrophage
GO:0070244	negative regulation of thymocyte apoptotic process	1959-01-01	10/18986	0.1	32.1797	5.50629	0.0306517	0.256136	0.219286	HIF1A	1	BP	upreg	Macrophage
GO:0070862	negative regulation of protein exit from endoplasmic reticulum	1959-01-01	10/18986	0.1	32.1797	5.50629	0.0306517	0.256136	0.219286	UBE2J1	1	BP	upreg	Macrophage
GO:0071372	cellular response to follicle-stimulating hormone stimulus	1959-01-01	10/18986	0.1	32.1797	5.50629	0.0306517	0.256136	0.219286	INHBA	1	BP	upreg	Macrophage
GO:2000563	positive regulation of CD4-positive, alpha-beta T cell proliferation	1959-01-01	10/18986	0.1	32.1797	5.50629	0.0306517	0.256136	0.219286	RIPK2	1	BP	upreg	Macrophage
GO:2000756	regulation of peptidyl-lysine acetylation	1959-01-01	10/18986	0.1	32.1797	5.50629	0.0306517	0.256136	0.219286	SOX4	1	BP	upreg	Macrophage
GO:2001241	positive regulation of extrinsic apoptotic signaling pathway in absence of ligand	1959-01-01	10/18986	0.1	32.1797	5.50629	0.0306517	0.256136	0.219286	INHBA	1	BP	upreg	Macrophage
GO:0045637	regulation of myeloid cell differentiation	1959-03-01	219/18986	0.0136986	4.40817	2.83228	0.0306816	0.256136	0.219286	ID2/INHBA/HIF1A	3	BP	upreg	Macrophage
GO:0050866	negative regulation of cell activation	1959-03-01	219/18986	0.0136986	4.40817	2.83228	0.0306816	0.256136	0.219286	ID2/INHBA/SAMSN1	3	BP	upreg	Macrophage
GO:1902806	regulation of cell cycle G1/S phase transition	1959-03-01	220/18986	0.0136364	4.38814	2.82213	0.0310387	0.256136	0.219286	ID2/INHBA/ADAMTS1	3	BP	upreg	Macrophage
GO:0050867	positive regulation of cell activation	1959-04-01	391/18986	0.0102302	3.29204	2.55683	0.0332032	0.256136	0.219286	SOX4/RIPK2/HSPH1/CD70	4	BP	upreg	Macrophage
GO:0030901	midbrain development	1959-02-01	92/18986	0.0217391	6.99558	3.2185	0.0332406	0.256136	0.219286	BASP1/HSPA5	2	BP	upreg	Macrophage
GO:2000243	positive regulation of reproductive process	1959-02-01	92/18986	0.0217391	6.99558	3.2185	0.0332406	0.256136	0.219286	INHBA/TAC1	2	BP	upreg	Macrophage
GO:1903037	regulation of leukocyte cell-cell adhesion	1959-04-01	392/18986	0.0102041	3.28364	2.55079	0.0334697	0.256136	0.219286	SOX4/RIPK2/HSPH1/CD70	4	BP	upreg	Macrophage
GO:0003357	noradrenergic neuron differentiation	1959-01-01	11/18986	0.0909091	29.2542	5.23335	0.0336656	0.256136	0.219286	SOX4	1	BP	upreg	Macrophage
GO:0006678	glucosylceramide metabolic process	1959-01-01	11/18986	0.0909091	29.2542	5.23335	0.0336656	0.256136	0.219286	UGCG	1	BP	upreg	Macrophage
GO:0006983	ER overload response	1959-01-01	11/18986	0.0909091	29.2542	5.23335	0.0336656	0.256136	0.219286	HSPA5	1	BP	upreg	Macrophage
GO:0034975	protein folding in endoplasmic reticulum	1959-01-01	11/18986	0.0909091	29.2542	5.23335	0.0336656	0.256136	0.219286	HSPA5	1	BP	upreg	Macrophage
GO:0045625	regulation of T-helper 1 cell differentiation	1959-01-01	11/18986	0.0909091	29.2542	5.23335	0.0336656	0.256136	0.219286	RIPK2	1	BP	upreg	Macrophage
GO:0046643	regulation of gamma-delta T cell activation	1959-01-01	11/18986	0.0909091	29.2542	5.23335	0.0336656	0.256136	0.219286	SOX4	1	BP	upreg	Macrophage
GO:0070391	response to lipoteichoic acid	1959-01-01	11/18986	0.0909091	29.2542	5.23335	0.0336656	0.256136	0.219286	RIPK2	1	BP	upreg	Macrophage
GO:0071223	cellular response to lipoteichoic acid	1959-01-01	11/18986	0.0909091	29.2542	5.23335	0.0336656	0.256136	0.219286	RIPK2	1	BP	upreg	Macrophage
GO:2001054	negative regulation of mesenchymal cell apoptotic process	1959-01-01	11/18986	0.0909091	29.2542	5.23335	0.0336656	0.256136	0.219286	HIF1A	1	BP	upreg	Macrophage
GO:0050863	regulation of T cell activation	1959-04-01	393/18986	0.0101781	3.27528	2.54476	0.0337375	0.256136	0.219286	SOX4/RIPK2/HSPH1/CD70	4	BP	upreg	Macrophage
GO:0014033	neural crest cell differentiation	1959-02-01	93/18986	0.0215054	6.92036	3.19543	0.0339045	0.256136	0.219286	KBTBD8/HIF1A	2	BP	upreg	Macrophage
GO:0014910	regulation of smooth muscle cell migration	1959-02-01	93/18986	0.0215054	6.92036	3.19543	0.0339045	0.256136	0.219286	GNA13/ADAMTS1	2	BP	upreg	Macrophage
GO:1904705	regulation of vascular associated smooth muscle cell proliferation	1959-02-01	94/18986	0.0212766	6.84674	3.1727	0.0345736	0.256136	0.219286	GNA13/ADAMTS1	2	BP	upreg	Macrophage
GO:0141091	transforming growth factor beta receptor superfamily signaling pathway	1959-04-01	397/18986	0.0100756	3.24228	2.52086	0.0348214	0.256136	0.219286	INHBA/SDCBP/HSPA5/ING1	4	BP	upreg	Macrophage
GO:0000423	mitophagy	1959-02-01	95/18986	0.0210526	6.77467	3.1503	0.0352479	0.256136	0.219286	GABARAPL1/HIF1A	2	BP	upreg	Macrophage
GO:0001942	hair follicle development	1959-02-01	96/18986	0.0208333	6.7041	3.12822	0.0359272	0.256136	0.219286	FOXQ1/INHBA	2	BP	upreg	Macrophage
GO:1990874	vascular associated smooth muscle cell proliferation	1959-02-01	96/18986	0.0208333	6.7041	3.12822	0.0359272	0.256136	0.219286	GNA13/ADAMTS1	2	BP	upreg	Macrophage
GO:0031331	positive regulation of cellular catabolic process	1959-03-01	235/18986	0.012766	4.10804	2.6767	0.0366581	0.256136	0.219286	RIPK2/BAG3/HIF1A	3	BP	upreg	Macrophage
GO:0001553	luteinization	1959-01-01	12/18986	0.0833333	26.8164	4.99456	0.0366703	0.256136	0.219286	INHBA	1	BP	upreg	Macrophage
GO:0002328	pro-B cell differentiation	1959-01-01	12/18986	0.0833333	26.8164	4.99456	0.0366703	0.256136	0.219286	SOX4	1	BP	upreg	Macrophage
GO:0006995	cellular response to nitrogen starvation	1959-01-01	12/18986	0.0833333	26.8164	4.99456	0.0366703	0.256136	0.219286	GABARAPL1	1	BP	upreg	Macrophage
GO:0019732	antifungal humoral response	1959-01-01	12/18986	0.0833333	26.8164	4.99456	0.0366703	0.256136	0.219286	TAC1	1	BP	upreg	Macrophage
GO:0032276	regulation of gonadotropin secretion	1959-01-01	12/18986	0.0833333	26.8164	4.99456	0.0366703	0.256136	0.219286	INHBA	1	BP	upreg	Macrophage
GO:0043562	cellular response to nitrogen levels	1959-01-01	12/18986	0.0833333	26.8164	4.99456	0.0366703	0.256136	0.219286	GABARAPL1	1	BP	upreg	Macrophage
GO:0045838	positive regulation of membrane potential	1959-01-01	12/18986	0.0833333	26.8164	4.99456	0.0366703	0.256136	0.219286	GLRX	1	BP	upreg	Macrophage
GO:0048671	negative regulation of collateral sprouting	1959-01-01	12/18986	0.0833333	26.8164	4.99456	0.0366703	0.256136	0.219286	IFRD1	1	BP	upreg	Macrophage
GO:0051133	regulation of NK T cell activation	1959-01-01	12/18986	0.0833333	26.8164	4.99456	0.0366703	0.256136	0.219286	HSPH1	1	BP	upreg	Macrophage
GO:0061370	testosterone biosynthetic process	1959-01-01	12/18986	0.0833333	26.8164	4.99456	0.0366703	0.256136	0.219286	INHBA	1	BP	upreg	Macrophage
GO:0061723	glycophagy	1959-01-01	12/18986	0.0833333	26.8164	4.99456	0.0366703	0.256136	0.219286	GABARAPL1	1	BP	upreg	Macrophage
GO:0070099	regulation of chemokine-mediated signaling pathway	1959-01-01	12/18986	0.0833333	26.8164	4.99456	0.0366703	0.256136	0.219286	HIF1A	1	BP	upreg	Macrophage
GO:0070671	response to interleukin-12	1959-01-01	12/18986	0.0833333	26.8164	4.99456	0.0366703	0.256136	0.219286	RIPK2	1	BP	upreg	Macrophage
GO:0070673	response to interleukin-18	1959-01-01	12/18986	0.0833333	26.8164	4.99456	0.0366703	0.256136	0.219286	RIPK2	1	BP	upreg	Macrophage
GO:0070857	regulation of bile acid biosynthetic process	1959-01-01	12/18986	0.0833333	26.8164	4.99456	0.0366703	0.256136	0.219286	STARD4	1	BP	upreg	Macrophage
GO:1903897	regulation of PERK-mediated unfolded protein response	1959-01-01	12/18986	0.0833333	26.8164	4.99456	0.0366703	0.256136	0.219286	HSPA5	1	BP	upreg	Macrophage
GO:0008406	gonad development	1959-03-01	236/18986	0.0127119	4.09063	2.66743	0.0370502	0.256136	0.219286	BASP1/INHBA/ADAMTS1	3	BP	upreg	Macrophage
GO:0097191	extrinsic apoptotic signaling pathway	1959-03-01	236/18986	0.0127119	4.09063	2.66743	0.0370502	0.256136	0.219286	INHBA/BAG3/CD70	3	BP	upreg	Macrophage
GO:0001558	regulation of cell growth	1959-04-01	408/18986	0.00980392	3.15487	2.45664	0.0379063	0.256136	0.219286	INHBA/IFRD1/SDCBP/ING1	4	BP	upreg	Macrophage
GO:0022404	molting cycle process	1959-02-01	99/18986	0.020202	6.50094	3.06382	0.0379956	0.256136	0.219286	FOXQ1/INHBA	2	BP	upreg	Macrophage
GO:0022405	hair cycle process	1959-02-01	99/18986	0.020202	6.50094	3.06382	0.0379956	0.256136	0.219286	FOXQ1/INHBA	2	BP	upreg	Macrophage
GO:0034620	cellular response to unfolded protein	1959-02-01	99/18986	0.020202	6.50094	3.06382	0.0379956	0.256136	0.219286	HSPA5/BAG3	2	BP	upreg	Macrophage
GO:0060993	kidney morphogenesis	1959-02-01	99/18986	0.020202	6.50094	3.06382	0.0379956	0.256136	0.219286	BASP1/SOX4	2	BP	upreg	Macrophage
GO:0014909	smooth muscle cell migration	1959-02-01	100/18986	0.02	6.43593	3.04295	0.0386951	0.256136	0.219286	GNA13/ADAMTS1	2	BP	upreg	Macrophage
GO:0045137	development of primary sexual characteristics	1959-03-01	241/18986	0.0124481	4.00577	2.62187	0.0390431	0.256136	0.219286	BASP1/INHBA/ADAMTS1	3	BP	upreg	Macrophage
GO:0048661	positive regulation of smooth muscle cell proliferation	1959-02-01	101/18986	0.019802	6.37221	3.02236	0.0393995	0.256136	0.219286	ID2/ADAMTS1	2	BP	upreg	Macrophage
GO:0003183	mitral valve morphogenesis	1959-01-01	13/18986	0.0769231	24.7536	4.78325	0.0396658	0.256136	0.219286	SOX4	1	BP	upreg	Macrophage
GO:0006596	polyamine biosynthetic process	1959-01-01	13/18986	0.0769231	24.7536	4.78325	0.0396658	0.256136	0.219286	AMD1	1	BP	upreg	Macrophage
GO:0007320	insemination	1959-01-01	13/18986	0.0769231	24.7536	4.78325	0.0396658	0.256136	0.219286	TAC1	1	BP	upreg	Macrophage
GO:0021978	telencephalon regionalization	1959-01-01	13/18986	0.0769231	24.7536	4.78325	0.0396658	0.256136	0.219286	TRA2B	1	BP	upreg	Macrophage
GO:0032494	response to peptidoglycan	1959-01-01	13/18986	0.0769231	24.7536	4.78325	0.0396658	0.256136	0.219286	RIPK2	1	BP	upreg	Macrophage
GO:0033083	regulation of immature T cell proliferation	1959-01-01	13/18986	0.0769231	24.7536	4.78325	0.0396658	0.256136	0.219286	RIPK2	1	BP	upreg	Macrophage
GO:0033084	regulation of immature T cell proliferation in thymus	1959-01-01	13/18986	0.0769231	24.7536	4.78325	0.0396658	0.256136	0.219286	RIPK2	1	BP	upreg	Macrophage
GO:0035437	maintenance of protein localization in endoplasmic reticulum	1959-01-01	13/18986	0.0769231	24.7536	4.78325	0.0396658	0.256136	0.219286	HSPA5	1	BP	upreg	Macrophage
GO:0042492	gamma-delta T cell differentiation	1959-01-01	13/18986	0.0769231	24.7536	4.78325	0.0396658	0.256136	0.219286	SOX4	1	BP	upreg	Macrophage
GO:0048711	positive regulation of astrocyte differentiation	1959-01-01	13/18986	0.0769231	24.7536	4.78325	0.0396658	0.256136	0.219286	ID2	1	BP	upreg	Macrophage
GO:0061029	eyelid development in camera-type eye	1959-01-01	13/18986	0.0769231	24.7536	4.78325	0.0396658	0.256136	0.219286	INHBA	1	BP	upreg	Macrophage
GO:0070914	UV-damage excision repair	1959-01-01	13/18986	0.0769231	24.7536	4.78325	0.0396658	0.256136	0.219286	H2AC25	1	BP	upreg	Macrophage
GO:0097202	activation of cysteine-type endopeptidase activity	1959-01-01	13/18986	0.0769231	24.7536	4.78325	0.0396658	0.256136	0.219286	RIPK2	1	BP	upreg	Macrophage
GO:0009743	response to carbohydrate	1959-03-01	243/18986	0.0123457	3.9728	2.60399	0.0398554	0.256136	0.219286	TRA2B/SOX4/HIF1A	3	BP	upreg	Macrophage
GO:0030900	forebrain development	1959-04-01	416/18986	0.00961538	3.0942	2.41129	0.0402464	0.256136	0.219286	ID2/TRA2B/INHBA/HIF1A	4	BP	upreg	Macrophage
GO:0008585	female gonad development	1959-02-01	103/18986	0.0194175	6.24848	2.98199	0.0408229	0.256136	0.219286	INHBA/ADAMTS1	2	BP	upreg	Macrophage
GO:2000177	regulation of neural precursor cell proliferation	1959-02-01	103/18986	0.0194175	6.24848	2.98199	0.0408229	0.256136	0.219286	ID2/HIF1A	2	BP	upreg	Macrophage
GO:0042102	positive regulation of T cell proliferation	1959-02-01	104/18986	0.0192308	6.1884	2.96221	0.0415419	0.256136	0.219286	RIPK2/CD70	2	BP	upreg	Macrophage
GO:0052548	regulation of endopeptidase activity	1959-03-01	248/18986	0.0120968	3.8927	2.56011	0.0419238	0.256136	0.219286	HSPE1/RIPK2/SERPINA3	3	BP	upreg	Macrophage
GO:0032602	chemokine production	1959-02-01	105/18986	0.0190476	6.12946	2.94269	0.0422656	0.256136	0.219286	RIPK2/HIF1A	2	BP	upreg	Macrophage
GO:0032642	regulation of chemokine production	1959-02-01	105/18986	0.0190476	6.12946	2.94269	0.0422656	0.256136	0.219286	RIPK2/HIF1A	2	BP	upreg	Macrophage
GO:0001878	response to yeast	1959-01-01	14/18986	0.0714286	22.9855	4.59445	0.0426521	0.256136	0.219286	TAC1	1	BP	upreg	Macrophage
GO:0003174	mitral valve development	1959-01-01	14/18986	0.0714286	22.9855	4.59445	0.0426521	0.256136	0.219286	SOX4	1	BP	upreg	Macrophage
GO:0033079	immature T cell proliferation	1959-01-01	14/18986	0.0714286	22.9855	4.59445	0.0426521	0.256136	0.219286	RIPK2	1	BP	upreg	Macrophage
GO:0033080	immature T cell proliferation in thymus	1959-01-01	14/18986	0.0714286	22.9855	4.59445	0.0426521	0.256136	0.219286	RIPK2	1	BP	upreg	Macrophage
GO:0043353	enucleate erythrocyte differentiation	1959-01-01	14/18986	0.0714286	22.9855	4.59445	0.0426521	0.256136	0.219286	ID2	1	BP	upreg	Macrophage
GO:0051000	positive regulation of nitric-oxide synthase activity	1959-01-01	14/18986	0.0714286	22.9855	4.59445	0.0426521	0.256136	0.219286	HIF1A	1	BP	upreg	Macrophage
GO:0072075	metanephric mesenchyme development	1959-01-01	14/18986	0.0714286	22.9855	4.59445	0.0426521	0.256136	0.219286	BASP1	1	BP	upreg	Macrophage
GO:0098792	xenophagy	1959-01-01	14/18986	0.0714286	22.9855	4.59445	0.0426521	0.256136	0.219286	RIPK2	1	BP	upreg	Macrophage
GO:0098840	protein transport along microtubule	1959-01-01	14/18986	0.0714286	22.9855	4.59445	0.0426521	0.256136	0.219286	BAG3	1	BP	upreg	Macrophage
GO:0099118	microtubule-based protein transport	1959-01-01	14/18986	0.0714286	22.9855	4.59445	0.0426521	0.256136	0.219286	BAG3	1	BP	upreg	Macrophage
GO:1900044	regulation of protein K63-linked ubiquitination	1959-01-01	14/18986	0.0714286	22.9855	4.59445	0.0426521	0.256136	0.219286	RIPK2	1	BP	upreg	Macrophage
GO:1903377	negative regulation of oxidative stress-induced neuron intrinsic apoptotic signaling pathway	1959-01-01	14/18986	0.0714286	22.9855	4.59445	0.0426521	0.256136	0.219286	HIF1A	1	BP	upreg	Macrophage
GO:1904152	regulation of retrograde protein transport, ER to cytosol	1959-01-01	14/18986	0.0714286	22.9855	4.59445	0.0426521	0.256136	0.219286	UBE2J1	1	BP	upreg	Macrophage
GO:2001053	regulation of mesenchymal cell apoptotic process	1959-01-01	14/18986	0.0714286	22.9855	4.59445	0.0426521	0.256136	0.219286	HIF1A	1	BP	upreg	Macrophage
GO:0007179	transforming growth factor beta receptor signaling pathway	1959-03-01	250/18986	0.012	3.86156	2.54287	0.0427661	0.256136	0.219286	SDCBP/HSPA5/ING1	3	BP	upreg	Macrophage
GO:0007178	cell surface receptor protein serine/threonine kinase signaling pathway	1959-04-01	425/18986	0.00941176	3.02867	2.36155	0.0429762	0.256136	0.219286	INHBA/SDCBP/HSPA5/ING1	4	BP	upreg	Macrophage
GO:0030098	lymphocyte differentiation	1959-04-01	426/18986	0.00938967	3.02156	2.3561	0.0432858	0.256136	0.219286	ID2/SOX4/INHBA/RIPK2	4	BP	upreg	Macrophage
GO:0033002	muscle cell proliferation	1959-03-01	252/18986	0.0119048	3.83091	2.52582	0.043617	0.256136	0.219286	ID2/GNA13/ADAMTS1	3	BP	upreg	Macrophage
GO:0046545	development of primary female sexual characteristics	1959-02-01	107/18986	0.0186916	6.01489	2.90439	0.0437274	0.256136	0.219286	INHBA/ADAMTS1	2	BP	upreg	Macrophage
GO:0050829	defense response to Gram-negative bacterium	1959-02-01	107/18986	0.0186916	6.01489	2.90439	0.0437274	0.256136	0.219286	H2BC11/TAC1	2	BP	upreg	Macrophage
GO:0007159	leukocyte cell-cell adhesion	1959-04-01	430/18986	0.00930233	2.99346	2.33448	0.0445372	0.256136	0.219286	SOX4/RIPK2/HSPH1/CD70	4	BP	upreg	Macrophage
GO:0090100	positive regulation of transmembrane receptor protein serine/threonine kinase signaling pathway	1959-02-01	109/18986	0.0183486	5.90452	2.86704	0.0452079	0.256136	0.219286	INHBA/SDCBP	2	BP	upreg	Macrophage
GO:0000082	G1/S transition of mitotic cell cycle	1959-03-01	256/18986	0.0117188	3.77105	2.49222	0.0453442	0.256136	0.219286	ID2/INHBA/ADAMTS1	3	BP	upreg	Macrophage
GO:0002069	columnar/cuboidal epithelial cell maturation	1959-01-01	15/18986	0.0666667	21.4531	4.42436	0.0456293	0.256136	0.219286	HIF1A	1	BP	upreg	Macrophage
GO:0006474	N-terminal protein amino acid acetylation	1959-01-01	15/18986	0.0666667	21.4531	4.42436	0.0456293	0.256136	0.219286	SOX4	1	BP	upreg	Macrophage
GO:0006620	post-translational protein targeting to endoplasmic reticulum membrane	1959-01-01	15/18986	0.0666667	21.4531	4.42436	0.0456293	0.256136	0.219286	HSPA5	1	BP	upreg	Macrophage
GO:0014029	neural crest formation	1959-01-01	15/18986	0.0666667	21.4531	4.42436	0.0456293	0.256136	0.219286	KBTBD8	1	BP	upreg	Macrophage
GO:0032352	positive regulation of hormone metabolic process	1959-01-01	15/18986	0.0666667	21.4531	4.42436	0.0456293	0.256136	0.219286	HIF1A	1	BP	upreg	Macrophage
GO:0060347	heart trabecula formation	1959-01-01	15/18986	0.0666667	21.4531	4.42436	0.0456293	0.256136	0.219286	ADAMTS1	1	BP	upreg	Macrophage
GO:0060413	atrial septum morphogenesis	1959-01-01	15/18986	0.0666667	21.4531	4.42436	0.0456293	0.256136	0.219286	SOX4	1	BP	upreg	Macrophage
GO:0061684	chaperone-mediated autophagy	1959-01-01	15/18986	0.0666667	21.4531	4.42436	0.0456293	0.256136	0.219286	BAG3	1	BP	upreg	Macrophage
GO:0070243	regulation of thymocyte apoptotic process	1959-01-01	15/18986	0.0666667	21.4531	4.42436	0.0456293	0.256136	0.219286	HIF1A	1	BP	upreg	Macrophage
GO:1902093	positive regulation of flagellated sperm motility	1959-01-01	15/18986	0.0666667	21.4531	4.42436	0.0456293	0.256136	0.219286	TAC1	1	BP	upreg	Macrophage
GO:1903543	positive regulation of exosomal secretion	1959-01-01	15/18986	0.0666667	21.4531	4.42436	0.0456293	0.256136	0.219286	SDCBP	1	BP	upreg	Macrophage
GO:1903894	regulation of IRE1-mediated unfolded protein response	1959-01-01	15/18986	0.0666667	21.4531	4.42436	0.0456293	0.256136	0.219286	HSPA5	1	BP	upreg	Macrophage
GO:1904251	regulation of bile acid metabolic process	1959-01-01	15/18986	0.0666667	21.4531	4.42436	0.0456293	0.256136	0.219286	STARD4	1	BP	upreg	Macrophage
GO:2000155	positive regulation of cilium-dependent cell motility	1959-01-01	15/18986	0.0666667	21.4531	4.42436	0.0456293	0.256136	0.219286	TAC1	1	BP	upreg	Macrophage
GO:0031669	cellular response to nutrient levels	1959-03-01	257/18986	0.0116732	3.75638	2.48393	0.0457813	0.256136	0.219286	INHBA/HSPA5/GABARAPL1	3	BP	upreg	Macrophage
GO:0051222	positive regulation of protein transport	1959-03-01	257/18986	0.0116732	3.75638	2.48393	0.0457813	0.256136	0.219286	SOX4/BAG3/HIF1A	3	BP	upreg	Macrophage
GO:0032963	collagen metabolic process	1959-02-01	111/18986	0.018018	5.79814	2.83062	0.0467068	0.256136	0.219286	INHBA/HIF1A	2	BP	upreg	Macrophage
GO:0022600	digestive system process	1959-02-01	112/18986	0.0178571	5.74637	2.81274	0.0474631	0.256136	0.219286	UGCG/SERPINA3	2	BP	upreg	Macrophage
GO:0031398	positive regulation of protein ubiquitination	1959-02-01	112/18986	0.0178571	5.74637	2.81274	0.0474631	0.256136	0.219286	RIPK2/HSPA5	2	BP	upreg	Macrophage
GO:0046883	regulation of hormone secretion	1959-03-01	261/18986	0.0114943	3.69881	2.45116	0.0475507	0.256136	0.219286	SOX4/INHBA/HIF1A	3	BP	upreg	Macrophage
GO:0036503	ERAD pathway	1959-02-01	113/18986	0.0176991	5.69552	2.79507	0.0482239	0.256136	0.219286	UBE2J1/HSPA5	2	BP	upreg	Macrophage
GO:0003353	positive regulation of cilium movement	1959-01-01	16/18986	0.0625	20.1123	4.27002	0.0485974	0.256136	0.219286	TAC1	1	BP	upreg	Macrophage
GO:0032354	response to follicle-stimulating hormone	1959-01-01	16/18986	0.0625	20.1123	4.27002	0.0485974	0.256136	0.219286	INHBA	1	BP	upreg	Macrophage
GO:0097152	mesenchymal cell apoptotic process	1959-01-01	16/18986	0.0625	20.1123	4.27002	0.0485974	0.256136	0.219286	HIF1A	1	BP	upreg	Macrophage
GO:1900034	regulation of cellular response to heat	1959-01-01	16/18986	0.0625	20.1123	4.27002	0.0485974	0.256136	0.219286	IER5	1	BP	upreg	Macrophage
GO:1901985	positive regulation of protein acetylation	1959-01-01	16/18986	0.0625	20.1123	4.27002	0.0485974	0.256136	0.219286	SOX4	1	BP	upreg	Macrophage
GO:0014812	muscle cell migration	1959-02-01	114/18986	0.0175439	5.64555	2.77761	0.0489891	0.256136	0.219286	GNA13/ADAMTS1	2	BP	upreg	Macrophage
GO:0035967	cellular response to topologically incorrect protein	1959-02-01	114/18986	0.0175439	5.64555	2.77761	0.0489891	0.256136	0.219286	HSPA5/BAG3	2	BP	upreg	Macrophage
GO:0090277	positive regulation of peptide hormone secretion	1959-02-01	114/18986	0.0175439	5.64555	2.77761	0.0489891	0.256136	0.219286	SOX4/HIF1A	2	BP	upreg	Macrophage
GO:2001056	positive regulation of cysteine-type endopeptidase activity	1959-02-01	114/18986	0.0175439	5.64555	2.77761	0.0489891	0.256136	0.219286	HSPE1/RIPK2	2	BP	upreg	Macrophage
GO:0042593	glucose homeostasis	1959-03-01	265/18986	0.0113208	3.64298	2.41904	0.0493538	0.256136	0.219286	TRA2B/SOX4/HIF1A	3	BP	upreg	Macrophage
GO:0051223	regulation of protein transport	1959-04-01	446/18986	0.00896861	2.88607	2.2504	0.0497462	0.256136	0.219286	SOX4/UBE2J1/BAG3/HIF1A	4	BP	upreg	Macrophage
GO:0000422	autophagy of mitochondrion	1959-02-01	115/18986	0.0173913	5.59646	2.76036	0.0497589	0.256136	0.219286	GABARAPL1/HIF1A	2	BP	upreg	Macrophage
GO:0045445	myoblast differentiation	1959-02-01	115/18986	0.0173913	5.59646	2.76036	0.0497589	0.256136	0.219286	SOX4/IFRD1	2	BP	upreg	Macrophage
GO:0033500	carbohydrate homeostasis	1959-03-01	266/18986	0.0112782	3.62929	2.4111	0.0498098	0.256136	0.219286	TRA2B/SOX4/HIF1A	3	BP	upreg	Macrophage
GO:0030527	structural constituent of chromatin	17/61	98/18737	0.173469	53.2835	29.6571	1.69798e-25	2.9375e-23	2.66314e-23	H3-7/H2BC18/H2AC25/H3C1/H2BC4/H2AC6/H2BC6/H2AC7/H2BC8/H2AC8/H1-3/H2BC11/H2AC11/H2BC13/H3C10/H2AC15/H3C12	17	MF	upreg	Macrophage
GO:0046982	protein heterodimerization activity	18/61	363/18737	0.0495868	15.2313	15.6479	5.97406e-17	5.16756e-15	4.68492e-15	H3-7/H2BC18/H2AC25/H3C1/H2BC4/H2AC6/H2BC6/H2AC7/H2BC8/H2AC8/H2BC11/H2AC11/H2BC13/H3C10/H2AC15/H3C12/SDCBP/HIF1A	18	MF	upreg	Macrophage
GO:0060590	ATPase regulator activity	1961-03-01	49/18737	0.0612245	18.806	7.13253	0.000543706	0.0313537	0.0284253	DNAJB4/BAG3/HSPH1	3	MF	upreg	Macrophage
GO:0051087	protein-folding chaperone binding	1961-04-01	134/18737	0.0298507	9.16907	5.42369	0.00095198	0.036857	0.0334146	DNAJB4/HSPE1/HSPA5/BAG3	4	MF	upreg	Macrophage
GO:0000774	adenyl-nucleotide exchange factor activity	1961-02-01	15/18737	0.133333	40.9552	8.84717	0.00106523	0.036857	0.0334146	BAG3/HSPH1	2	MF	upreg	Macrophage
GO:0044183	protein folding chaperone	1961-03-01	75/18737	0.04	12.2866	5.59725	0.00187661	0.0541088	0.0490552	HSPE1/HSPA5/HSPH1	3	MF	upreg	Macrophage
GO:0045296	cadherin binding	1961-05-01	334/18737	0.0149701	4.59826	3.79213	0.00459492	0.11356	0.102954	H3C1/H3C10/H3C12/HSPA5/BAG3	5	MF	upreg	Macrophage
GO:0051082	unfolded protein binding	1961-03-01	122/18737	0.0245902	7.55321	4.15015	0.00736486	0.144365	0.130882	DNAJB4/HSPE1/HSPA5	3	MF	upreg	Macrophage
GO:0140662	ATP-dependent protein folding chaperone	1961-02-01	40/18737	0.05	15.3582	5.19524	0.00751033	0.144365	0.130882	HSPA5/HSPH1	2	MF	upreg	Macrophage
GO:0043014	alpha-tubulin binding	1961-02-01	45/18737	0.0444444	13.6517	4.85612	0.00943359	0.163201	0.147958	ARL4C/HSPH1	2	MF	upreg	Macrophage
GO:0031625	ubiquitin protein ligase binding	1961-04-01	301/18737	0.013289	4.08191	3.08057	0.0166385	0.261678	0.237238	UBE2J1/HSPA5/GABARAPL1/HIF1A	4	MF	upreg	Macrophage
GO:0044389	ubiquitin-like protein ligase binding	1961-04-01	321/18737	0.0124611	3.82759	2.92033	0.0205443	0.29618	0.268517	UBE2J1/HSPA5/GABARAPL1/HIF1A	4	MF	upreg	Macrophage
GO:0030957	Tat protein binding	1961-01-01	10/18737	0.1	30.7164	5.37184	0.0320907	0.334598	0.303347	GABARAPL1	1	MF	upreg	Macrophage
GO:0004706	JUN kinase kinase kinase activity	1961-01-01	11/18737	0.0909091	27.924	5.10475	0.0352435	0.334598	0.303347	RIPK2	1	MF	upreg	Macrophage
GO:0140537	transcription regulator activator activity	1961-01-01	11/18737	0.0909091	27.924	5.10475	0.0352435	0.334598	0.303347	HIF1A	1	MF	upreg	Macrophage
GO:0035251	UDP-glucosyltransferase activity	1961-01-01	12/18737	0.0833333	25.597	4.87106	0.0383862	0.334598	0.303347	UGCG	1	MF	upreg	Macrophage
GO:0061575	cyclin-dependent protein serine/threonine kinase activator activity	1961-01-01	12/18737	0.0833333	25.597	4.87106	0.0383862	0.334598	0.303347	CKS2	1	MF	upreg	Macrophage
GO:0070697	activin receptor binding	1961-01-01	12/18737	0.0833333	25.597	4.87106	0.0383862	0.334598	0.303347	INHBA	1	MF	upreg	Macrophage
GO:0008191	metalloendopeptidase inhibitor activity	1961-01-01	14/18737	0.0714286	21.9403	4.4794	0.0446414	0.334598	0.303347	RARRES1	1	MF	upreg	Macrophage
GO:0089720	caspase binding	1961-01-01	14/18737	0.0714286	21.9403	4.4794	0.0446414	0.334598	0.303347	RIPK2	1	MF	upreg	Macrophage
GO:0042043	neurexin family protein binding	1961-01-01	15/18737	0.0666667	20.4776	4.31287	0.047754	0.334598	0.303347	SDCBP	1	MF	upreg	Macrophage
GO:0043176	amine binding	1961-01-01	15/18737	0.0666667	20.4776	4.31287	0.047754	0.334598	0.303347	AMD1	1	MF	upreg	Macrophage
GO:0050700	CARD domain binding	1961-01-01	15/18737	0.0666667	20.4776	4.31287	0.047754	0.334598	0.303347	RIPK2	1	MF	upreg	Macrophage
GO:0050780	dopamine receptor binding	1961-01-01	15/18737	0.0666667	20.4776	4.31287	0.047754	0.334598	0.303347	GNA13	1	MF	upreg	Macrophage
GO:0000786	nucleosome	17/60	135/19960	0.125926	41.8914	26.1764	1.38879e-23	1.80543e-21	1.6227e-21	H3-7/H2BC18/H2AC25/H3C1/H2BC4/H2AC6/H2BC6/H2AC7/H2BC8/H2AC8/H1-3/H2BC11/H2AC11/H2BC13/H3C10/H2AC15/H3C12	17	CC	upreg	Macrophage
GO:0032993	protein-DNA complex	18/60	240/19960	0.075	24.95	20.4963	8.57212e-21	5.57188e-19	5.00793e-19	BCAS2/H3-7/H2BC18/H2AC25/H3C1/H2BC4/H2AC6/H2BC6/H2AC7/H2BC8/H2AC8/H1-3/H2BC11/H2AC11/H2BC13/H3C10/H2AC15/H3C12	18	CC	upreg	Macrophage
GO:0000791	euchromatin	1960-03-01	63/19960	0.047619	15.8413	6.47837	0.000902029	0.0318565	0.0286322	ID2/H1-3/HIF1A	3	CC	upreg	Macrophage
GO:0043505	CENP-A containing nucleosome	1960-02-01	18/19960	0.111111	36.963	8.38158	0.00131808	0.0318565	0.0286322	H2AC8/H2BC11	2	CC	upreg	Macrophage
GO:0061638	CENP-A containing chromatin	1960-02-01	18/19960	0.111111	36.963	8.38158	0.00131808	0.0318565	0.0286322	H2AC8/H2BC11	2	CC	upreg	Macrophage
GO:0034506	chromosome, centromeric core domain	1960-02-01	19/19960	0.105263	35.0175	8.14563	0.0014703	0.0318565	0.0286322	H2AC8/H2BC11	2	CC	upreg	Macrophage
GO:0042470	melanosome	1960-03-01	112/19960	0.0267857	8.91071	4.60983	0.00466519	0.0757195	0.0680556	SDCBP/HSPA5/GNA13	3	CC	upreg	Macrophage
GO:0048770	pigment granule	1960-03-01	112/19960	0.0267857	8.91071	4.60983	0.00466519	0.0757195	0.0680556	SDCBP/HSPA5/GNA13	3	CC	upreg	Macrophage
GO:0008180	COP9 signalosome	1960-02-01	36/19960	0.0555556	18.4815	5.76447	0.00524212	0.0757195	0.0680556	BASP1/HSPA5	2	CC	upreg	Macrophage
GO:0016234	inclusion body	1960-02-01	74/19960	0.027027	8.99099	3.78148	0.0208948	0.271632	0.244139	BAG3/NXF1	2	CC	upreg	Macrophage
GO:0035578	azurophil granule lumen	1960-02-01	91/19960	0.021978	7.31136	3.3134	0.0306683	0.298169	0.26799	SDCBP/SERPINA3	2	CC	upreg	Macrophage
GO:0034663	endoplasmic reticulum chaperone complex	1960-01-01	11/19960	0.0909091	30.2424	5.32682	0.0325816	0.298169	0.26799	HSPA5	1	CC	upreg	Macrophage
GO:0000346	transcription export complex	1960-01-01	12/19960	0.0833333	27.7222	5.08431	0.0354913	0.298169	0.26799	NXF1	1	CC	upreg	Macrophage
GO:0042405	nuclear inclusion body	1960-01-01	12/19960	0.0833333	27.7222	5.08431	0.0354913	0.298169	0.26799	NXF1	1	CC	upreg	Macrophage
GO:0016607	nuclear speck	1960-04-01	416/19960	0.00961538	3.19872	2.48844	0.0363561	0.298169	0.26799	BCAS2/BASP1/NXF1/HIF1A	4	CC	upreg	Macrophage
GO:0005662	DNA replication factor A complex	1960-01-01	13/19960	0.0769231	25.5897	4.86974	0.0383924	0.298169	0.26799	BCAS2	1	CC	upreg	Macrophage
GO:0000974	Prp19 complex	1960-01-01	14/19960	0.0714286	23.7619	4.67803	0.0412849	0.298169	0.26799	BCAS2	1	CC	upreg	Macrophage
GO:0150005	enzyme activator complex	1960-01-01	14/19960	0.0714286	23.7619	4.67803	0.0412849	0.298169	0.26799	INHBA	1	CC	upreg	Macrophage
GO:0090571	RNA polymerase II transcription repressor complex	1960-01-01	15/19960	0.0666667	22.1778	4.50534	0.0441688	0.302208	0.27162	MXD1	1	CC	upreg	Macrophage
GO:0055003	cardiac myofibril assembly	2026-02-22	19/18986	0.105263	90.8421	13.3447	0.000216575	0.041433	0.0297282	TTN/NEBL	2	BP	downreg	Macrophage
GO:0015812	gamma-aminobutyric acid transport	2026-02-22	21/18986	0.0952381	82.1905	12.6791	0.000265596	0.041433	0.0297282	CACNB4/SLC6A11	2	BP	downreg	Macrophage
GO:0019370	leukotriene biosynthetic process	2026-02-22	21/18986	0.0952381	82.1905	12.6791	0.000265596	0.041433	0.0297282	LTC4S/GGTA1	2	BP	downreg	Macrophage
GO:0006691	leukotriene metabolic process	2026-02-22	34/18986	0.0588235	50.7647	9.89202	0.000703079	0.0649675	0.0466141	LTC4S/GGTA1	2	BP	downreg	Macrophage
GO:0007628	adult walking behavior	2026-02-22	34/18986	0.0588235	50.7647	9.89202	0.000703079	0.0649675	0.0466141	DAB1/CACNB4	2	BP	downreg	Macrophage
GO:0021799	cerebral cortex radially oriented cell migration	2026-02-22	37/18986	0.0540541	46.6486	9.46645	0.000832916	0.0649675	0.0466141	DAB1/CCDC141	2	BP	downreg	Macrophage
GO:0090659	walking behavior	2026-02-22	40/18986	0.05	43.15	9.08909	0.000973437	0.0650812	0.0466957	DAB1/CACNB4	2	BP	downreg	Macrophage
GO:0042692	muscle cell differentiation	2026-04-22	432/18986	0.00925926	7.99074	5.00608	0.00139672	0.0738245	0.052969	KCNH1/CACNB4/TTN/NEBL	4	BP	downreg	Macrophage
GO:0021795	cerebral cortex cell migration	2026-02-22	49/18986	0.0408163	35.2245	8.17017	0.00145841	0.0738245	0.052969	DAB1/CCDC141	2	BP	downreg	Macrophage
GO:0055001	muscle cell development	2026-03-22	205/18986	0.0146341	12.6293	5.70193	0.00164191	0.0738245	0.052969	CACNB4/TTN/NEBL	3	BP	downreg	Macrophage
GO:0006836	neurotransmitter transport	2026-03-22	209/18986	0.0143541	12.3876	5.63822	0.00173519	0.0738245	0.052969	CACNB4/SLC6A11/UNC13C	3	BP	downreg	Macrophage
GO:0046456	icosanoid biosynthetic process	2026-02-22	60/18986	0.0333333	28.7667	7.33705	0.0021782	0.0836586	0.0600249	LTC4S/GGTA1	2	BP	downreg	Macrophage
GO:0022029	telencephalon cell migration	2026-02-22	62/18986	0.0322581	27.8387	7.20946	0.00232385	0.0836586	0.0600249	DAB1/CCDC141	2	BP	downreg	Macrophage
GO:0021885	forebrain cell migration	2026-02-22	65/18986	0.0307692	26.5538	7.02898	0.00255075	0.0852678	0.0611795	DAB1/CCDC141	2	BP	downreg	Macrophage
GO:0030239	myofibril assembly	2026-02-22	77/18986	0.025974	22.4156	6.41346	0.00355819	0.111015	0.0796535	TTN/NEBL	2	BP	downreg	Macrophage
GO:0008344	adult locomotory behavior	2026-02-22	84/18986	0.0238095	20.5476	6.11549	0.00421846	0.116285	0.0834343	DAB1/CACNB4	2	BP	downreg	Macrophage
GO:0055013	cardiac muscle cell development	2026-02-22	88/18986	0.0227273	19.6136	5.96096	0.00461938	0.116285	0.0834343	TTN/NEBL	2	BP	downreg	Macrophage
GO:0055006	cardiac cell development	2026-02-22	95/18986	0.0210526	18.1684	5.71369	0.00536175	0.116285	0.0834343	TTN/NEBL	2	BP	downreg	Macrophage
GO:0051146	striated muscle cell differentiation	2026-03-22	314/18986	0.00955414	8.24522	4.40933	0.00546562	0.116285	0.0834343	KCNH1/TTN/NEBL	3	BP	downreg	Macrophage
GO:0016079	synaptic vesicle exocytosis	2026-02-22	102/18986	0.0196078	16.9216	5.4915	0.00615532	0.116285	0.0834343	CACNB4/UNC13C	2	BP	downreg	Macrophage
GO:0035249	synaptic transmission, glutamatergic	2026-02-22	111/18986	0.018018	15.5495	5.23624	0.00724958	0.116285	0.0834343	CACNB4/UNC13C	2	BP	downreg	Macrophage
GO:0046942	carboxylic acid transport	2026-03-22	357/18986	0.00840336	7.2521	4.06179	0.00778723	0.116285	0.0834343	CACNB4/SLC6A11/SLC16A12	3	BP	downreg	Macrophage
GO:0015849	organic acid transport	2026-03-22	358/18986	0.00837989	7.23184	4.0544	0.00784717	0.116285	0.0834343	CACNB4/SLC6A11/SLC16A12	3	BP	downreg	Macrophage
GO:0006690	icosanoid metabolic process	2026-02-22	124/18986	0.016129	13.9194	4.91597	0.00897387	0.116285	0.0834343	LTC4S/GGTA1	2	BP	downreg	Macrophage
GO:0021987	cerebral cortex development	2026-02-22	130/18986	0.0153846	13.2769	4.78397	0.00982577	0.116285	0.0834343	DAB1/CCDC141	2	BP	downreg	Macrophage
GO:0055007	cardiac muscle cell differentiation	2026-02-22	131/18986	0.0152672	13.1756	4.76281	0.00997115	0.116285	0.0834343	TTN/NEBL	2	BP	downreg	Macrophage
GO:0051592	response to calcium ion	2026-02-22	137/18986	0.0145985	12.5985	4.64057	0.0108635	0.116285	0.0834343	KCNH1/TTN	2	BP	downreg	Macrophage
GO:0010927	cellular component assembly involved in morphogenesis	2026-02-22	140/18986	0.0142857	12.3286	4.58228	0.0113226	0.116285	0.0834343	TTN/NEBL	2	BP	downreg	Macrophage
GO:0032989	cellular anatomical entity morphogenesis	2026-02-22	140/18986	0.0142857	12.3286	4.58228	0.0113226	0.116285	0.0834343	TTN/NEBL	2	BP	downreg	Macrophage
GO:0002883	regulation of hypersensitivity	2026-01-22	10/18986	0.1	86.3	9.18964	0.01153	0.116285	0.0834343	C3	1	BP	downreg	Macrophage
GO:0014866	skeletal myofibril assembly	2026-01-22	10/18986	0.1	86.3	9.18964	0.01153	0.116285	0.0834343	TTN	1	BP	downreg	Macrophage
GO:0019227	neuronal action potential propagation	2026-01-22	10/18986	0.1	86.3	9.18964	0.01153	0.116285	0.0834343	CACNB4	1	BP	downreg	Macrophage
GO:0051933	amino acid neurotransmitter reuptake	2026-01-22	10/18986	0.1	86.3	9.18964	0.01153	0.116285	0.0834343	SLC6A11	1	BP	downreg	Macrophage
GO:1901750	leukotriene D4 biosynthetic process	2026-01-22	10/18986	0.1	86.3	9.18964	0.01153	0.116285	0.0834343	GGTA1	1	BP	downreg	Macrophage
GO:2000425	regulation of apoptotic cell clearance	2026-01-22	10/18986	0.1	86.3	9.18964	0.01153	0.116285	0.0834343	C3	1	BP	downreg	Macrophage
GO:0009581	detection of external stimulus	2026-02-22	144/18986	0.0138889	11.9861	4.50727	0.0119478	0.116285	0.0834343	CACNB4/TTN	2	BP	downreg	Macrophage
GO:0007269	neurotransmitter secretion	2026-02-22	146/18986	0.0136986	11.8219	4.47087	0.0122661	0.116285	0.0834343	CACNB4/UNC13C	2	BP	downreg	Macrophage
GO:0009582	detection of abiotic stimulus	2026-02-22	146/18986	0.0136986	11.8219	4.47087	0.0122661	0.116285	0.0834343	CACNB4/TTN	2	BP	downreg	Macrophage
GO:0050770	regulation of axonogenesis	2026-02-22	146/18986	0.0136986	11.8219	4.47087	0.0122661	0.116285	0.0834343	DAB1/CHODL	2	BP	downreg	Macrophage
GO:0099643	signal release from synapse	2026-02-22	146/18986	0.0136986	11.8219	4.47087	0.0122661	0.116285	0.0834343	CACNB4/UNC13C	2	BP	downreg	Macrophage
GO:0001794	type IIa hypersensitivity	2026-01-22	11/18986	0.0909091	78.4545	8.75193	0.012676	0.116285	0.0834343	C3	1	BP	downreg	Macrophage
GO:0002445	type II hypersensitivity	2026-01-22	11/18986	0.0909091	78.4545	8.75193	0.012676	0.116285	0.0834343	C3	1	BP	downreg	Macrophage
GO:0097278	complement-dependent cytotoxicity	2026-01-22	11/18986	0.0909091	78.4545	8.75193	0.012676	0.116285	0.0834343	C3	1	BP	downreg	Macrophage
GO:0098870	action potential propagation	2026-01-22	11/18986	0.0909091	78.4545	8.75193	0.012676	0.116285	0.0834343	CACNB4	1	BP	downreg	Macrophage
GO:0030534	adult behavior	2026-02-22	151/18986	0.013245	11.4305	4.38289	0.0130779	0.116285	0.0834343	DAB1/CACNB4	2	BP	downreg	Macrophage
GO:0038026	reelin-mediated signaling pathway	2026-01-22	12/18986	0.0833333	71.9167	8.36972	0.0138207	0.116285	0.0834343	DAB1	1	BP	downreg	Macrophage
GO:1901748	leukotriene D4 metabolic process	2026-01-22	12/18986	0.0833333	71.9167	8.36972	0.0138207	0.116285	0.0834343	GGTA1	1	BP	downreg	Macrophage
GO:1990504	dense core granule exocytosis	2026-01-22	12/18986	0.0833333	71.9167	8.36972	0.0138207	0.116285	0.0834343	UNC13C	1	BP	downreg	Macrophage
GO:1903825	organic acid transmembrane transport	2026-02-22	159/18986	0.0125786	10.8553	4.25042	0.0144245	0.116285	0.0834343	SLC6A11/SLC16A12	2	BP	downreg	Macrophage
GO:0002863	positive regulation of inflammatory response to antigenic stimulus	2026-01-22	13/18986	0.0769231	66.3846	8.03213	0.0149641	0.116285	0.0834343	C3	1	BP	downreg	Macrophage
GO:0014051	gamma-aminobutyric acid secretion	2026-01-22	13/18986	0.0769231	66.3846	8.03213	0.0149641	0.116285	0.0834343	CACNB4	1	BP	downreg	Macrophage
GO:0016081	synaptic vesicle docking	2026-01-22	13/18986	0.0769231	66.3846	8.03213	0.0149641	0.116285	0.0834343	UNC13C	1	BP	downreg	Macrophage
GO:0060100	positive regulation of phagocytosis, engulfment	2026-01-22	13/18986	0.0769231	66.3846	8.03213	0.0149641	0.116285	0.0834343	C3	1	BP	downreg	Macrophage
GO:0097475	motor neuron migration	2026-01-22	13/18986	0.0769231	66.3846	8.03213	0.0149641	0.116285	0.0834343	DAB1	1	BP	downreg	Macrophage
GO:1905155	positive regulation of membrane invagination	2026-01-22	13/18986	0.0769231	66.3846	8.03213	0.0149641	0.116285	0.0834343	C3	1	BP	downreg	Macrophage
GO:0006865	amino acid transport	2026-02-22	165/18986	0.0121212	10.4606	4.15711	0.0154725	0.116285	0.0834343	CACNB4/SLC6A11	2	BP	downreg	Macrophage
GO:0015711	organic anion transport	2026-03-22	462/18986	0.00649351	5.6039	3.41217	0.0156332	0.116285	0.0834343	CACNB4/SLC6A11/SLC16A12	3	BP	downreg	Macrophage
GO:0035051	cardiocyte differentiation	2026-02-22	167/18986	0.011976	10.3353	4.12706	0.0158289	0.116285	0.0834343	TTN/NEBL	2	BP	downreg	Macrophage
GO:0051645	Golgi localization	2026-01-22	14/18986	0.0714286	61.6429	7.73106	0.0161063	0.116285	0.0834343	DAB1	1	BP	downreg	Macrophage
GO:0002430	complement receptor mediated signaling pathway	2026-01-22	15/18986	0.0666667	57.5333	7.46031	0.0172473	0.116285	0.0834343	C3	1	BP	downreg	Macrophage
GO:0016322	neuron remodeling	2026-01-22	15/18986	0.0666667	57.5333	7.46031	0.0172473	0.116285	0.0834343	C3	1	BP	downreg	Macrophage
GO:0048791	calcium ion-regulated exocytosis of neurotransmitter	2026-01-22	15/18986	0.0666667	57.5333	7.46031	0.0172473	0.116285	0.0834343	UNC13C	1	BP	downreg	Macrophage
GO:0060099	regulation of phagocytosis, engulfment	2026-01-22	15/18986	0.0666667	57.5333	7.46031	0.0172473	0.116285	0.0834343	C3	1	BP	downreg	Macrophage
GO:0098883	synapse pruning	2026-01-22	15/18986	0.0666667	57.5333	7.46031	0.0172473	0.116285	0.0834343	C3	1	BP	downreg	Macrophage
GO:1900452	regulation of long-term synaptic depression	2026-01-22	15/18986	0.0666667	57.5333	7.46031	0.0172473	0.116285	0.0834343	SORCS3	1	BP	downreg	Macrophage
GO:1901029	negative regulation of mitochondrial outer membrane permeabilization involved in apoptotic signaling pathway	2026-01-22	15/18986	0.0666667	57.5333	7.46031	0.0172473	0.116285	0.0834343	MPV17L	1	BP	downreg	Macrophage
GO:1905153	regulation of membrane invagination	2026-01-22	15/18986	0.0666667	57.5333	7.46031	0.0172473	0.116285	0.0834343	C3	1	BP	downreg	Macrophage
GO:0055002	striated muscle cell development	2026-02-22	177/18986	0.0112994	9.75141	3.98413	0.0176639	0.116285	0.0834343	TTN/NEBL	2	BP	downreg	Macrophage
GO:0015718	monocarboxylic acid transport	2026-02-22	179/18986	0.0111732	9.64246	3.95691	0.0180414	0.116285	0.0834343	SLC6A11/SLC16A12	2	BP	downreg	Macrophage
GO:0002864	regulation of acute inflammatory response to antigenic stimulus	2026-01-22	16/18986	0.0625	53.9375	7.21508	0.0183869	0.116285	0.0834343	C3	1	BP	downreg	Macrophage
GO:0021819	layer formation in cerebral cortex	2026-01-22	16/18986	0.0625	53.9375	7.21508	0.0183869	0.116285	0.0834343	DAB1	1	BP	downreg	Macrophage
GO:0048712	negative regulation of astrocyte differentiation	2026-01-22	16/18986	0.0625	53.9375	7.21508	0.0183869	0.116285	0.0834343	DAB1	1	BP	downreg	Macrophage
GO:0050665	hydrogen peroxide biosynthetic process	2026-01-22	16/18986	0.0625	53.9375	7.21508	0.0183869	0.116285	0.0834343	MPV17L	1	BP	downreg	Macrophage
GO:0099509	regulation of presynaptic cytosolic calcium ion concentration	2026-01-22	16/18986	0.0625	53.9375	7.21508	0.0183869	0.116285	0.0834343	CACNB4	1	BP	downreg	Macrophage
GO:0018126	protein hydroxylation	2026-01-22	17/18986	0.0588235	50.7647	6.99158	0.0195253	0.118673	0.085148	P3H2	1	BP	downreg	Macrophage
GO:0021535	cell migration in hindbrain	2026-01-22	17/18986	0.0588235	50.7647	6.99158	0.0195253	0.118673	0.085148	DAB1	1	BP	downreg	Macrophage
GO:0048532	anatomical structure arrangement	2026-01-22	17/18986	0.0588235	50.7647	6.99158	0.0195253	0.118673	0.085148	DAB1	1	BP	downreg	Macrophage
GO:0006957	complement activation, alternative pathway	2026-01-22	18/18986	0.0555556	47.9444	6.78674	0.0206625	0.121448	0.0871388	C3	1	BP	downreg	Macrophage
GO:0010310	regulation of hydrogen peroxide metabolic process	2026-01-22	18/18986	0.0555556	47.9444	6.78674	0.0206625	0.121448	0.0871388	MPV17L	1	BP	downreg	Macrophage
GO:0021543	pallium development	2026-02-22	195/18986	0.0102564	8.85128	3.75348	0.0211834	0.121448	0.0871388	DAB1/CCDC141	2	BP	downreg	Macrophage
GO:0002524	hypersensitivity	2026-01-22	19/18986	0.0526316	45.4211	6.59809	0.0217983	0.121448	0.0871388	C3	1	BP	downreg	Macrophage
GO:0007076	mitotic chromosome condensation	2026-01-22	19/18986	0.0526316	45.4211	6.59809	0.0217983	0.121448	0.0871388	TTN	1	BP	downreg	Macrophage
GO:1902570	protein localization to nucleolus	2026-01-22	19/18986	0.0526316	45.4211	6.59809	0.0217983	0.121448	0.0871388	CACNB4	1	BP	downreg	Macrophage
GO:1903427	negative regulation of reactive oxygen species biosynthetic process	2026-01-22	19/18986	0.0526316	45.4211	6.59809	0.0217983	0.121448	0.0871388	MPV17L	1	BP	downreg	Macrophage
GO:0002888	positive regulation of myeloid leukocyte mediated immunity	2026-01-22	21/18986	0.047619	41.0952	6.26149	0.0240663	0.12534	0.0899312	C3	1	BP	downreg	Macrophage
GO:0007626	locomotory behavior	2026-02-22	213/18986	0.00938967	8.10329	3.55086	0.0249712	0.12534	0.0899312	DAB1/CACNB4	2	BP	downreg	Macrophage
GO:0006662	glycerol ether metabolic process	2026-01-22	22/18986	0.0454545	39.2273	6.11042	0.0251985	0.12534	0.0899312	PXMP4	1	BP	downreg	Macrophage
GO:0035795	negative regulation of mitochondrial membrane permeability	2026-01-22	22/18986	0.0454545	39.2273	6.11042	0.0251985	0.12534	0.0899312	MPV17L	1	BP	downreg	Macrophage
GO:0046485	ether lipid metabolic process	2026-01-22	22/18986	0.0454545	39.2273	6.11042	0.0251985	0.12534	0.0899312	PXMP4	1	BP	downreg	Macrophage
GO:0050908	detection of light stimulus involved in visual perception	2026-01-22	22/18986	0.0454545	39.2273	6.11042	0.0251985	0.12534	0.0899312	CACNB4	1	BP	downreg	Macrophage
GO:0050962	detection of light stimulus involved in sensory perception	2026-01-22	22/18986	0.0454545	39.2273	6.11042	0.0251985	0.12534	0.0899312	CACNB4	1	BP	downreg	Macrophage
GO:0031032	actomyosin structure organization	2026-02-22	216/18986	0.00925926	7.99074	3.51941	0.0256278	0.12534	0.0899312	TTN/NEBL	2	BP	downreg	Macrophage
GO:0010737	protein kinase A signaling	2026-01-22	23/18986	0.0434783	37.5217	5.96916	0.0263293	0.12534	0.0899312	TTN	1	BP	downreg	Macrophage
GO:0010866	regulation of triglyceride biosynthetic process	2026-01-22	23/18986	0.0434783	37.5217	5.96916	0.0263293	0.12534	0.0899312	C3	1	BP	downreg	Macrophage
GO:0030449	regulation of complement activation	2026-01-22	23/18986	0.0434783	37.5217	5.96916	0.0263293	0.12534	0.0899312	C3	1	BP	downreg	Macrophage
GO:0032253	dense core granule localization	2026-01-22	23/18986	0.0434783	37.5217	5.96916	0.0263293	0.12534	0.0899312	UNC13C	1	BP	downreg	Macrophage
GO:0046058	cAMP metabolic process	2026-01-22	23/18986	0.0434783	37.5217	5.96916	0.0263293	0.12534	0.0899312	CACNB4	1	BP	downreg	Macrophage
GO:0046426	negative regulation of receptor signaling pathway via JAK-STAT	2026-01-22	23/18986	0.0434783	37.5217	5.96916	0.0263293	0.12534	0.0899312	DAB1	1	BP	downreg	Macrophage
GO:0048167	regulation of synaptic plasticity	2026-02-22	220/18986	0.00909091	7.84545	3.4784	0.0265142	0.12534	0.0899312	SORCS3/UNC13C	2	BP	downreg	Macrophage
GO:0099504	synaptic vesicle cycle	2026-02-22	222/18986	0.00900901	7.77477	3.45828	0.0269621	0.125988	0.0903963	CACNB4/UNC13C	2	BP	downreg	Macrophage
GO:0002922	positive regulation of humoral immune response	2026-01-22	24/18986	0.0416667	35.9583	5.83668	0.0274589	0.125988	0.0903963	C3	1	BP	downreg	Macrophage
GO:1901028	regulation of mitochondrial outer membrane permeabilization involved in apoptotic signaling pathway	2026-01-22	24/18986	0.0416667	35.9583	5.83668	0.0274589	0.125988	0.0903963	MPV17L	1	BP	downreg	Macrophage
GO:0045055	regulated exocytosis	2026-02-22	229/18986	0.00873362	7.53712	3.3898	0.028554	0.127418	0.091422	CACNB4/UNC13C	2	BP	downreg	Macrophage
GO:0035994	response to muscle stretch	2026-01-22	25/18986	0.04	34.52	5.71209	0.0285873	0.127418	0.091422	TTN	1	BP	downreg	Macrophage
GO:1905709	negative regulation of membrane permeability	2026-01-22	25/18986	0.04	34.52	5.71209	0.0285873	0.127418	0.091422	MPV17L	1	BP	downreg	Macrophage
GO:0016082	synaptic vesicle priming	2026-01-22	26/18986	0.0384615	33.1923	5.59463	0.0297144	0.128762	0.0923868	UNC13C	1	BP	downreg	Macrophage
GO:0032252	secretory granule localization	2026-01-22	26/18986	0.0384615	33.1923	5.59463	0.0297144	0.128762	0.0923868	UNC13C	1	BP	downreg	Macrophage
GO:0090128	regulation of synapse maturation	2026-01-22	26/18986	0.0384615	33.1923	5.59463	0.0297144	0.128762	0.0923868	DAB1	1	BP	downreg	Macrophage
GO:0010884	positive regulation of lipid storage	2026-01-22	27/18986	0.037037	31.963	5.48363	0.0308402	0.128962	0.0925299	C3	1	BP	downreg	Macrophage
GO:0018904	ether metabolic process	2026-01-22	27/18986	0.037037	31.963	5.48363	0.0308402	0.128962	0.0925299	PXMP4	1	BP	downreg	Macrophage
GO:0042759	long-chain fatty acid biosynthetic process	2026-01-22	27/18986	0.037037	31.963	5.48363	0.0308402	0.128962	0.0925299	LTC4S	1	BP	downreg	Macrophage
GO:0002675	positive regulation of acute inflammatory response	2026-01-22	28/18986	0.0357143	30.8214	5.37852	0.0319649	0.128962	0.0925299	C3	1	BP	downreg	Macrophage
GO:0021801	cerebral cortex radial glia-guided migration	2026-01-22	28/18986	0.0357143	30.8214	5.37852	0.0319649	0.128962	0.0925299	DAB1	1	BP	downreg	Macrophage
GO:0022030	telencephalon glial cell migration	2026-01-22	28/18986	0.0357143	30.8214	5.37852	0.0319649	0.128962	0.0925299	DAB1	1	BP	downreg	Macrophage
GO:0045686	negative regulation of glial cell differentiation	2026-01-22	28/18986	0.0357143	30.8214	5.37852	0.0319649	0.128962	0.0925299	DAB1	1	BP	downreg	Macrophage
GO:0150146	cell junction disassembly	2026-01-22	28/18986	0.0357143	30.8214	5.37852	0.0319649	0.128962	0.0925299	C3	1	BP	downreg	Macrophage
GO:0048738	cardiac muscle tissue development	2026-02-22	252/18986	0.00793651	6.84921	3.18371	0.0340439	0.134542	0.0965334	TTN/NEBL	2	BP	downreg	Macrophage
GO:0002438	acute inflammatory response to antigenic stimulus	2026-01-22	30/18986	0.0333333	28.7667	5.18397	0.0342103	0.134542	0.0965334	C3	1	BP	downreg	Macrophage
GO:0007214	gamma-aminobutyric acid signaling pathway	2026-01-22	30/18986	0.0333333	28.7667	5.18397	0.0342103	0.134542	0.0965334	CACNB4	1	BP	downreg	Macrophage
GO:1901385	regulation of voltage-gated calcium channel activity	2026-01-22	31/18986	0.0322581	27.8387	5.09369	0.0353312	0.137363	0.0985575	CACNB4	1	BP	downreg	Macrophage
GO:0099003	vesicle-mediated transport in synapse	2026-02-22	258/18986	0.00775194	6.68992	3.13417	0.0355394	0.137363	0.0985575	CACNB4/UNC13C	2	BP	downreg	Macrophage
GO:0010575	positive regulation of vascular endothelial growth factor production	2026-01-22	32/18986	0.03125	26.9688	5.00757	0.0364509	0.137363	0.0985575	C3	1	BP	downreg	Macrophage
GO:0051642	centrosome localization	2026-01-22	32/18986	0.03125	26.9688	5.00757	0.0364509	0.137363	0.0985575	CCDC141	1	BP	downreg	Macrophage
GO:0061842	microtubule organizing center localization	2026-01-22	32/18986	0.03125	26.9688	5.00757	0.0364509	0.137363	0.0985575	CCDC141	1	BP	downreg	Macrophage
GO:0018208	peptidyl-proline modification	2026-01-22	33/18986	0.030303	26.1515	4.92531	0.0375693	0.137363	0.0985575	P3H2	1	BP	downreg	Macrophage
GO:0048710	regulation of astrocyte differentiation	2026-01-22	33/18986	0.030303	26.1515	4.92531	0.0375693	0.137363	0.0985575	DAB1	1	BP	downreg	Macrophage
GO:0097345	mitochondrial outer membrane permeabilization	2026-01-22	33/18986	0.030303	26.1515	4.92531	0.0375693	0.137363	0.0985575	MPV17L	1	BP	downreg	Macrophage
GO:0099170	postsynaptic modulation of chemical synaptic transmission	2026-01-22	33/18986	0.030303	26.1515	4.92531	0.0375693	0.137363	0.0985575	SORCS3	1	BP	downreg	Macrophage
GO:0060292	long-term synaptic depression	2026-01-22	34/18986	0.0294118	25.3824	4.84662	0.0386864	0.140351	0.100701	SORCS3	1	BP	downreg	Macrophage
GO:0098810	neurotransmitter reuptake	2026-01-22	35/18986	0.0285714	24.6571	4.77125	0.0398023	0.142195	0.102024	SLC6A11	1	BP	downreg	Macrophage
GO:1904893	negative regulation of receptor signaling pathway via STAT	2026-01-22	35/18986	0.0285714	24.6571	4.77125	0.0398023	0.142195	0.102024	DAB1	1	BP	downreg	Macrophage
GO:0021537	telencephalon development	2026-02-22	281/18986	0.00711744	6.14235	2.95793	0.0415051	0.147154	0.105583	DAB1/CCDC141	2	BP	downreg	Macrophage
GO:0006904	vesicle docking involved in exocytosis	2026-01-22	39/18986	0.025641	22.1282	4.49859	0.0442537	0.152734	0.109587	UNC13C	1	BP	downreg	Macrophage
GO:0045745	positive regulation of G protein-coupled receptor signaling pathway	2026-01-22	40/18986	0.025	21.575	4.43673	0.0453634	0.152734	0.109587	C3	1	BP	downreg	Macrophage
GO:0048536	spleen development	2026-01-22	40/18986	0.025	21.575	4.43673	0.0453634	0.152734	0.109587	CACNB4	1	BP	downreg	Macrophage
GO:0052652	cyclic purine nucleotide metabolic process	2026-01-22	40/18986	0.025	21.575	4.43673	0.0453634	0.152734	0.109587	CACNB4	1	BP	downreg	Macrophage
GO:0060074	synapse maturation	2026-01-22	40/18986	0.025	21.575	4.43673	0.0453634	0.152734	0.109587	DAB1	1	BP	downreg	Macrophage
GO:0072337	modified amino acid transport	2026-01-22	40/18986	0.025	21.575	4.43673	0.0453634	0.152734	0.109587	SLC16A12	1	BP	downreg	Macrophage
GO:1902110	positive regulation of mitochondrial membrane permeability involved in apoptotic process	2026-01-22	40/18986	0.025	21.575	4.43673	0.0453634	0.152734	0.109587	MPV17L	1	BP	downreg	Macrophage
GO:0009187	cyclic nucleotide metabolic process	2026-01-22	41/18986	0.0243902	21.0488	4.37708	0.0464719	0.154039	0.110523	CACNB4	1	BP	downreg	Macrophage
GO:0097242	amyloid-beta clearance	2026-01-22	41/18986	0.0243902	21.0488	4.37708	0.0464719	0.154039	0.110523	C3	1	BP	downreg	Macrophage
GO:0006958	complement activation, classical pathway	2026-01-22	42/18986	0.0238095	20.5476	4.31951	0.0475792	0.154039	0.110523	C3	1	BP	downreg	Macrophage
GO:1902686	mitochondrial outer membrane permeabilization involved in programmed cell death	2026-01-22	42/18986	0.0238095	20.5476	4.31951	0.0475792	0.154039	0.110523	MPV17L	1	BP	downreg	Macrophage
GO:0002714	positive regulation of B cell mediated immunity	2026-01-22	43/18986	0.0232558	20.0698	4.2639	0.0486853	0.154039	0.110523	C3	1	BP	downreg	Macrophage
GO:0002891	positive regulation of immunoglobulin mediated immune response	2026-01-22	43/18986	0.0232558	20.0698	4.2639	0.0486853	0.154039	0.110523	C3	1	BP	downreg	Macrophage
GO:0010828	positive regulation of D-glucose transmembrane transport	2026-01-22	44/18986	0.0227273	19.6136	4.21014	0.0497901	0.154039	0.110523	C3	1	BP	downreg	Macrophage
GO:0019432	triglyceride biosynthetic process	2026-01-22	44/18986	0.0227273	19.6136	4.21014	0.0497901	0.154039	0.110523	C3	1	BP	downreg	Macrophage
GO:0035794	positive regulation of mitochondrial membrane permeability	2026-01-22	44/18986	0.0227273	19.6136	4.21014	0.0497901	0.154039	0.110523	MPV17L	1	BP	downreg	Macrophage
GO:0046717	acid secretion	2026-01-22	44/18986	0.0227273	19.6136	4.21014	0.0497901	0.154039	0.110523	CACNB4	1	BP	downreg	Macrophage
GO:0008307	structural constituent of muscle	2026-02-22	42/18737	0.047619	40.5563	8.79898	0.00110132	0.0959424	0.0655083	TTN/NEBL	2	MF	downreg	Macrophage
GO:0005516	calmodulin binding	2026-03-22	206/18737	0.0145631	12.4031	5.64239	0.00172869	0.0959424	0.0655083	KCNH1/TTN/UNC13C	3	MF	downreg	Macrophage
GO:0008028	monocarboxylic acid transmembrane transporter activity	2026-02-22	73/18737	0.0273973	23.3337	6.55504	0.00328834	0.109664	0.0748769	SLC6A11/SLC16A12	2	MF	downreg	Macrophage
GO:0022843	voltage-gated monoatomic cation channel activity	2026-02-22	135/18737	0.0148148	12.6175	4.64467	0.0108315	0.109664	0.0748769	KCNH1/CACNB4	2	MF	downreg	Macrophage
GO:0031543	peptidyl-proline dioxygenase activity	2026-01-22	12/18737	0.0833333	70.9735	8.3132	0.0140032	0.109664	0.0748769	P3H2	1	MF	downreg	Macrophage
GO:0097493	structural molecule activity conferring elasticity	2026-01-22	12/18737	0.0833333	70.9735	8.3132	0.0140032	0.109664	0.0748769	TTN	1	MF	downreg	Macrophage
GO:0046873	metal ion transmembrane transporter activity	2026-03-22	444/18737	0.00675676	5.75461	3.47631	0.0145645	0.109664	0.0748769	KCNH1/CACNB4/SLC6A11	3	MF	downreg	Macrophage
GO:0005244	voltage-gated monoatomic ion channel activity	2026-02-22	164/18737	0.0121951	10.3864	4.13936	0.0156813	0.109664	0.0748769	KCNH1/CACNB4	2	MF	downreg	Macrophage
GO:0022832	voltage-gated channel activity	2026-02-22	166/18737	0.0120482	10.2612	4.10922	0.0160446	0.109664	0.0748769	KCNH1/CACNB4	2	MF	downreg	Macrophage
GO:0008331	high voltage-gated calcium channel activity	2026-01-22	14/18737	0.0714286	60.8344	7.6786	0.0163188	0.109664	0.0748769	CACNB4	1	MF	downreg	Macrophage
GO:0019992	diacylglycerol binding	2026-01-22	14/18737	0.0714286	60.8344	7.6786	0.0163188	0.109664	0.0748769	UNC13C	1	MF	downreg	Macrophage
GO:0005523	tropomyosin binding	2026-01-22	15/18737	0.0666667	56.7788	7.40958	0.0174747	0.109664	0.0748769	NEBL	1	MF	downreg	Macrophage
GO:0016846	carbon-sulfur lyase activity	2026-01-22	15/18737	0.0666667	56.7788	7.40958	0.0174747	0.109664	0.0748769	LTC4S	1	MF	downreg	Macrophage
GO:0031005	filamin binding	2026-01-22	15/18737	0.0666667	56.7788	7.40958	0.0174747	0.109664	0.0748769	NEBL	1	MF	downreg	Macrophage
GO:0051371	muscle alpha-actinin binding	2026-01-22	15/18737	0.0666667	56.7788	7.40958	0.0174747	0.109664	0.0748769	TTN	1	MF	downreg	Macrophage
GO:0140161	monocarboxylate:sodium symporter activity	2026-01-22	15/18737	0.0666667	56.7788	7.40958	0.0174747	0.109664	0.0748769	SLC6A11	1	MF	downreg	Macrophage
GO:0015378	sodium:chloride symporter activity	2026-01-22	16/18737	0.0625	53.2301	7.16591	0.0186292	0.109664	0.0748769	SLC6A11	1	MF	downreg	Macrophage
GO:0046943	carboxylic acid transmembrane transporter activity	2026-02-22	185/18737	0.0108108	9.20737	3.84636	0.0196745	0.109664	0.0748769	SLC6A11/SLC16A12	2	MF	downreg	Macrophage
GO:0005342	organic acid transmembrane transporter activity	2026-02-22	186/18737	0.0107527	9.15787	3.83358	0.0198743	0.109664	0.0748769	SLC6A11/SLC16A12	2	MF	downreg	Macrophage
GO:0015373	monoatomic anion:sodium symporter activity	2026-01-22	18/18737	0.0555556	47.3157	6.74028	0.0209344	0.109664	0.0748769	SLC6A11	1	MF	downreg	Macrophage
GO:0015355	secondary active monocarboxylate transmembrane transporter activity	2026-01-22	19/18737	0.0526316	44.8254	6.55281	0.0220851	0.109664	0.0748769	SLC6A11	1	MF	downreg	Macrophage
GO:0017075	syntaxin-1 binding	2026-01-22	19/18737	0.0526316	44.8254	6.55281	0.0220851	0.109664	0.0748769	UNC13C	1	MF	downreg	Macrophage
GO:0031418	L-ascorbic acid binding	2026-01-22	20/18737	0.05	42.5841	6.37939	0.0232345	0.109664	0.0748769	P3H2	1	MF	downreg	Macrophage
GO:0051015	actin filament binding	2026-02-22	211/18737	0.00947867	8.07281	3.5424	0.0251454	0.109664	0.0748769	TTN/NEBL	2	MF	downreg	Macrophage
GO:0015377	chloride:monoatomic cation symporter activity	2026-01-22	22/18737	0.0454545	38.7128	6.0682	0.0255294	0.109664	0.0748769	SLC6A11	1	MF	downreg	Macrophage
GO:0004602	glutathione peroxidase activity	2026-01-22	23/18737	0.0434783	37.0296	5.92783	0.0266749	0.109664	0.0748769	LTC4S	1	MF	downreg	Macrophage
GO:0005283	amino acid:sodium symporter activity	2026-01-22	23/18737	0.0434783	37.0296	5.92783	0.0266749	0.109664	0.0748769	SLC6A11	1	MF	downreg	Macrophage
GO:0005251	delayed rectifier potassium channel activity	2026-01-22	25/18737	0.04	34.0673	5.67235	0.0289621	0.110855	0.0756904	KCNH1	1	MF	downreg	Macrophage
GO:0015296	monoatomic anion:monoatomic cation symporter activity	2026-01-22	25/18737	0.04	34.0673	5.67235	0.0289621	0.110855	0.0756904	SLC6A11	1	MF	downreg	Macrophage
GO:0004364	glutathione transferase activity	2026-01-22	27/18737	0.037037	31.5438	5.44531	0.0312441	0.115603	0.0789326	LTC4S	1	MF	downreg	Macrophage
GO:0051393	alpha-actinin binding	2026-01-22	28/18737	0.0357143	30.4172	5.34085	0.0323832	0.115953	0.0791713	TTN	1	MF	downreg	Macrophage
GO:0005416	amino acid:monoatomic cation symporter activity	2026-01-22	29/18737	0.0344828	29.3683	5.24172	0.0335211	0.116276	0.079392	SLC6A11	1	MF	downreg	Macrophage
GO:0072349	modified amino acid transmembrane transporter activity	2026-01-22	31/18737	0.0322581	27.4736	5.05776	0.0357929	0.120394	0.0822038	SLC16A12	1	MF	downreg	Macrophage
GO:0008514	organic anion transmembrane transporter activity	2026-02-22	268/18737	0.00746269	6.35583	3.0278	0.0390118	0.127362	0.0869614	SLC6A11/SLC16A12	2	MF	downreg	Macrophage
GO:0005343	organic acid:sodium symporter activity	2026-01-22	35/18737	0.0285714	24.3338	4.73729	0.0403212	0.127733	0.0872148	SLC6A11	1	MF	downreg	Macrophage
GO:0030246	carbohydrate binding	2026-02-22	280/18737	0.00714286	6.08344	2.9384	0.0422333	0.127733	0.0872148	P3H2/CHODL	2	MF	downreg	Macrophage
GO:0042805	actinin binding	2026-01-22	37/18737	0.027027	23.0184	4.59644	0.0425778	0.127733	0.0872148	TTN	1	MF	downreg	Macrophage
GO:0015291	secondary active transmembrane transporter activity	2026-02-22	288/18737	0.00694444	5.91446	2.88164	0.0444356	0.129799	0.088625	SLC6A11/SLC16A12	2	MF	downreg	Macrophage
GO:0005245	voltage-gated calcium channel activity	2026-01-22	43/18737	0.0232558	19.8066	4.23299	0.0493171	0.139098	0.0949746	CACNB4	1	MF	downreg	Macrophage
GO:0042734	presynaptic membrane	2026-03-23	186/19960	0.016129	13.9972	6.0487	0.00122916	0.0556119	0.0399129	KCNH1/SLC6A11/UNC13C	3	CC	downreg	Macrophage
GO:0097060	synaptic membrane	2026-04-23	453/19960	0.00883002	7.66292	4.87217	0.00164601	0.0556119	0.0399129	KCNH1/SLC6A11/SORCS3/UNC13C	4	CC	downreg	Macrophage
GO:0005778	peroxisomal membrane	2026-02-23	65/19960	0.0307692	26.7023	7.04954	0.00252782	0.0556119	0.0399129	MPV17L/PXMP4	2	CC	downreg	Macrophage
GO:0031903	microbody membrane	2026-02-23	65/19960	0.0307692	26.7023	7.04954	0.00252782	0.0556119	0.0399129	MPV17L/PXMP4	2	CC	downreg	Macrophage
GO:0032580	Golgi cisterna membrane	2026-02-23	93/19960	0.0215054	18.6629	5.79884	0.00509827	0.08432	0.0605167	GAL3ST4/GGTA1	2	CC	downreg	Macrophage
GO:0045211	postsynaptic membrane	2026-03-23	321/19960	0.00934579	8.11052	4.36212	0.00574909	0.08432	0.0605167	KCNH1/SLC6A11/SORCS3	3	CC	downreg	Macrophage
GO:0031985	Golgi cisterna	2026-02-23	118/19960	0.0169492	14.7089	5.07288	0.00808429	0.0877305	0.0629645	GAL3ST4/GGTA1	2	CC	downreg	Macrophage
GO:0098839	postsynaptic density membrane	2026-02-23	125/19960	0.016	13.8852	4.90833	0.00903203	0.0877305	0.0629645	KCNH1/SORCS3	2	CC	downreg	Macrophage
GO:0030018	Z disc	2026-02-23	133/19960	0.0150376	13.05	4.73575	0.0101732	0.0877305	0.0629645	TTN/NEBL	2	CC	downreg	Macrophage
GO:0005777	peroxisome	2026-02-23	146/19960	0.0136986	11.888	4.4848	0.0121568	0.0877305	0.0629645	MPV17L/PXMP4	2	CC	downreg	Macrophage
GO:0042579	microbody	2026-02-23	146/19960	0.0136986	11.888	4.4848	0.0121568	0.0877305	0.0629645	MPV17L/PXMP4	2	CC	downreg	Macrophage
GO:0031674	I band	2026-02-23	148/19960	0.0135135	11.7274	4.44901	0.0124759	0.0877305	0.0629645	TTN/NEBL	2	CC	downreg	Macrophage
GO:0005795	Golgi stack	2026-02-23	151/19960	0.013245	11.4944	4.39661	0.0129615	0.0877305	0.0629645	GAL3ST4/GGTA1	2	CC	downreg	Macrophage
GO:0099634	postsynaptic specialization membrane	2026-02-23	157/19960	0.0127389	11.0551	4.2961	0.0139571	0.0877305	0.0629645	KCNH1/SORCS3	2	CC	downreg	Macrophage
GO:0098831	presynaptic active zone cytoplasmic component	2026-01-23	18/19960	0.0555556	48.2126	6.80633	0.0205482	0.12055	0.0865189	UNC13C	1	CC	downreg	Macrophage
GO:0044305	calyx of Held	2026-01-23	21/19960	0.047619	41.3251	6.27966	0.0239334	0.121627	0.0872918	UNC13C	1	CC	downreg	Macrophage
GO:0005865	striated muscle thin filament	2026-01-23	23/19960	0.0434783	37.7316	5.98655	0.026184	0.121627	0.0872918	TTN	1	CC	downreg	Macrophage
GO:0030017	sarcomere	2026-02-23	222/19960	0.00900901	7.81825	3.46978	0.0267241	0.121627	0.0872918	TTN/NEBL	2	CC	downreg	Macrophage
GO:0034703	cation channel complex	2026-02-23	228/19960	0.00877193	7.61251	3.41076	0.0280745	0.121627	0.0872918	KCNH1/CACNB4	2	CC	downreg	Macrophage
GO:0098688	parallel fiber to Purkinje cell synapse	2026-01-23	25/19960	0.04	34.713	5.72879	0.0284296	0.121627	0.0872918	UNC13C	1	CC	downreg	Macrophage
GO:0036379	myofilament	2026-01-23	27/19960	0.037037	32.1417	5.49973	0.0306703	0.121627	0.0872918	TTN	1	CC	downreg	Macrophage
GO:0030016	myofibril	2026-02-23	243/19960	0.00823045	7.1426	3.27219	0.0315688	0.121627	0.0872918	TTN/NEBL	2	CC	downreg	Macrophage
GO:0031430	M band	2026-01-23	28/19960	0.0357143	30.9938	5.39434	0.0317888	0.121627	0.0872918	TTN	1	CC	downreg	Macrophage
GO:0043292	contractile muscle fiber	2026-02-23	253/19960	0.00790514	6.86029	3.18619	0.0339899	0.123682	0.0887666	TTN/NEBL	2	CC	downreg	Macrophage
GO:0005640	nuclear outer membrane	2026-01-23	31/19960	0.0322581	27.9944	5.10875	0.0351368	0.123682	0.0887666	LTC4S	1	CC	downreg	Macrophage
GO:0099738	cell cortex region	2026-01-23	36/19960	0.0277778	24.1063	4.71299	0.0406922	0.137728	0.0988476	UNC13C	1	CC	downreg	Macrophage
GO:0031672	A band	2026-01-23	41/19960	0.0243902	21.1665	4.39028	0.0462171	0.146794	0.105354	TTN	1	CC	downreg	Macrophage
GO:0031965	nuclear membrane	2026-02-23	312/19960	0.00641026	5.56299	2.75912	0.049663	0.146794	0.105354	KCNH1/LTC4S	2	CC	downreg	Macrophage
GO:1990504	dense core granule exocytosis	2026-01-07	12/18986	0.0833333	226.024	14.9747	0.00441663	0.0886177	0.0490533	CADPS	1	BP	upreg	Mast cell
GO:0051782	negative regulation of cell division	2026-01-07	17/18986	0.0588235	159.546	12.5596	0.00625195	0.0886177	0.0490533	TEX14	1	BP	upreg	Mast cell
GO:0006044	N-acetylglucosamine metabolic process	2026-01-07	18/18986	0.0555556	150.683	12.2015	0.00661867	0.0886177	0.0490533	EXTL2	1	BP	upreg	Mast cell
GO:0051132	NK T cell activation	2026-01-07	19/18986	0.0526316	142.752	11.872	0.00698527	0.0886177	0.0490533	CLEC2B	1	BP	upreg	Mast cell
GO:0032253	dense core granule localization	2026-01-07	23/18986	0.0434783	117.925	10.7755	0.00845051	0.0886177	0.0490533	CADPS	1	BP	upreg	Mast cell
GO:1901071	glucosamine-containing compound metabolic process	2026-01-07	25/18986	0.04	108.491	10.3283	0.00918243	0.0886177	0.0490533	EXTL2	1	BP	upreg	Mast cell
GO:0032252	secretory granule localization	2026-01-07	26/18986	0.0384615	104.319	10.1243	0.00954822	0.0886177	0.0490533	CADPS	1	BP	upreg	Mast cell
GO:0015012	heparan sulfate proteoglycan biosynthetic process	2026-01-07	33/18986	0.030303	82.1905	8.9648	0.0121055	0.0886177	0.0490533	EXTL2	1	BP	upreg	Mast cell
GO:0051656	establishment of organelle localization	2026-02-07	488/18986	0.00409836	11.1159	4.34781	0.0127088	0.0886177	0.0490533	CADPS/TEX14	2	BP	upreg	Mast cell
GO:0006040	amino sugar metabolic process	2026-01-07	43/18986	0.0232558	63.0764	7.82626	0.0157489	0.0886177	0.0490533	EXTL2	1	BP	upreg	Mast cell
GO:0009225	nucleotide-sugar metabolic process	2026-01-07	46/18986	0.0217391	58.9627	7.55885	0.0168397	0.0886177	0.0490533	EXTL2	1	BP	upreg	Mast cell
GO:0007094	mitotic spindle assembly checkpoint signaling	2026-01-07	49/18986	0.0204082	55.3528	7.31614	0.0179295	0.0886177	0.0490533	TEX14	1	BP	upreg	Mast cell
GO:0071173	spindle assembly checkpoint signaling	2026-01-07	49/18986	0.0204082	55.3528	7.31614	0.0179295	0.0886177	0.0490533	TEX14	1	BP	upreg	Mast cell
GO:0071174	mitotic spindle checkpoint signaling	2026-01-07	49/18986	0.0204082	55.3528	7.31614	0.0179295	0.0886177	0.0490533	TEX14	1	BP	upreg	Mast cell
GO:0031577	spindle checkpoint signaling	2026-01-07	50/18986	0.02	54.2457	7.24008	0.0182925	0.0886177	0.0490533	TEX14	1	BP	upreg	Mast cell
GO:0033046	negative regulation of sister chromatid segregation	2026-01-07	51/18986	0.0196078	53.1821	7.16624	0.0186554	0.0886177	0.0490533	TEX14	1	BP	upreg	Mast cell
GO:0033048	negative regulation of mitotic sister chromatid segregation	2026-01-07	51/18986	0.0196078	53.1821	7.16624	0.0186554	0.0886177	0.0490533	TEX14	1	BP	upreg	Mast cell
GO:0045841	negative regulation of mitotic metaphase/anaphase transition	2026-01-07	51/18986	0.0196078	53.1821	7.16624	0.0186554	0.0886177	0.0490533	TEX14	1	BP	upreg	Mast cell
GO:2000816	negative regulation of mitotic sister chromatid separation	2026-01-07	51/18986	0.0196078	53.1821	7.16624	0.0186554	0.0886177	0.0490533	TEX14	1	BP	upreg	Mast cell
GO:0006890	retrograde vesicle-mediated transport, Golgi to endoplasmic reticulum	2026-01-07	52/18986	0.0192308	52.1593	7.09452	0.0190182	0.0886177	0.0490533	BET1L	1	BP	upreg	Mast cell
GO:1902100	negative regulation of metaphase/anaphase transition of cell cycle	2026-01-07	53/18986	0.0188679	51.1752	7.02482	0.0193809	0.0886177	0.0490533	TEX14	1	BP	upreg	Mast cell
GO:1905819	negative regulation of chromosome separation	2026-01-07	53/18986	0.0188679	51.1752	7.02482	0.0193809	0.0886177	0.0490533	TEX14	1	BP	upreg	Mast cell
GO:0008608	attachment of spindle microtubules to kinetochore	2026-01-07	54/18986	0.0185185	50.2275	6.95703	0.0197434	0.0886177	0.0490533	TEX14	1	BP	upreg	Mast cell
GO:0051985	negative regulation of chromosome segregation	2026-01-07	54/18986	0.0185185	50.2275	6.95703	0.0197434	0.0886177	0.0490533	TEX14	1	BP	upreg	Mast cell
GO:0007140	male meiotic nuclear division	2026-01-07	55/18986	0.0181818	49.3143	6.89109	0.0201059	0.0886177	0.0490533	TEX14	1	BP	upreg	Mast cell
GO:0033047	regulation of mitotic sister chromatid segregation	2026-01-07	58/18986	0.0172414	46.7635	6.70346	0.0211925	0.0886177	0.0490533	TEX14	1	BP	upreg	Mast cell
GO:0045839	negative regulation of mitotic nuclear division	2026-01-07	59/18986	0.0169492	45.9709	6.64408	0.0215545	0.0886177	0.0490533	TEX14	1	BP	upreg	Mast cell
GO:0010965	regulation of mitotic sister chromatid separation	2026-01-07	62/18986	0.016129	43.7465	6.47453	0.0226398	0.0886177	0.0490533	TEX14	1	BP	upreg	Mast cell
GO:0030166	proteoglycan biosynthetic process	2026-01-07	65/18986	0.0153846	41.7275	6.31669	0.023724	0.0886177	0.0490533	EXTL2	1	BP	upreg	Mast cell
GO:0051306	mitotic sister chromatid separation	2026-01-07	65/18986	0.0153846	41.7275	6.31669	0.023724	0.0886177	0.0490533	TEX14	1	BP	upreg	Mast cell
GO:0017156	calcium-ion regulated exocytosis	2026-01-07	66/18986	0.0151515	41.0952	6.26645	0.0240852	0.0886177	0.0490533	CADPS	1	BP	upreg	Mast cell
GO:0051784	negative regulation of nuclear division	2026-01-07	67/18986	0.0149254	40.4819	6.21733	0.0244462	0.0886177	0.0490533	TEX14	1	BP	upreg	Mast cell
GO:0030514	negative regulation of BMP signaling pathway	2026-01-07	74/18986	0.0135135	36.6525	5.9014	0.0269705	0.0920321	0.0509434	HTRA3	1	BP	upreg	Mast cell
GO:1905818	regulation of chromosome separation	2026-01-07	77/18986	0.012987	35.2245	5.77917	0.0280506	0.0920321	0.0509434	TEX14	1	BP	upreg	Mast cell
GO:0045921	positive regulation of exocytosis	2026-01-07	81/18986	0.0123457	33.485	5.62671	0.0294892	0.0920321	0.0509434	CADPS	1	BP	upreg	Mast cell
GO:0051304	chromosome separation	2026-01-07	84/18986	0.0119048	32.2891	5.51946	0.0305669	0.0920321	0.0509434	TEX14	1	BP	upreg	Mast cell
GO:0006029	proteoglycan metabolic process	2026-01-07	89/18986	0.011236	30.4751	5.35269	0.0323608	0.0920321	0.0509434	EXTL2	1	BP	upreg	Mast cell
GO:0030071	regulation of mitotic metaphase/anaphase transition	2026-01-07	93/18986	0.0107527	29.1644	5.22888	0.0337939	0.0920321	0.0509434	TEX14	1	BP	upreg	Mast cell
GO:0032465	regulation of cytokinesis	2026-01-07	95/18986	0.0105263	28.5504	5.16987	0.0345098	0.0920321	0.0509434	TEX14	1	BP	upreg	Mast cell
GO:1902099	regulation of metaphase/anaphase transition of cell cycle	2026-01-07	96/18986	0.0104167	28.253	5.14104	0.0348675	0.0920321	0.0509434	TEX14	1	BP	upreg	Mast cell
GO:0007091	metaphase/anaphase transition of mitotic cell cycle	2026-01-07	97/18986	0.0103093	27.9617	5.11265	0.0352252	0.0920321	0.0509434	TEX14	1	BP	upreg	Mast cell
GO:0044784	metaphase/anaphase transition of cell cycle	2026-01-07	100/18986	0.01	27.1229	5.03	0.0362974	0.0920321	0.0509434	TEX14	1	BP	upreg	Mast cell
GO:2001251	negative regulation of chromosome organization	2026-01-07	101/18986	0.00990099	26.8543	5.00326	0.0366546	0.0920321	0.0509434	TEX14	1	BP	upreg	Mast cell
GO:0016079	synaptic vesicle exocytosis	2026-01-07	102/18986	0.00980392	26.591	4.9769	0.0370117	0.0920321	0.0509434	CADPS	1	BP	upreg	Mast cell
GO:0042147	retrograde transport, endosome to Golgi	2026-01-07	103/18986	0.00970874	26.3329	4.95091	0.0373687	0.0920321	0.0509434	BET1L	1	BP	upreg	Mast cell
GO:0051310	metaphase chromosome alignment	2026-01-07	103/18986	0.00970874	26.3329	4.95091	0.0373687	0.0920321	0.0509434	TEX14	1	BP	upreg	Mast cell
GO:1990830	cellular response to leukemia inhibitory factor	2026-01-07	103/18986	0.00970874	26.3329	4.95091	0.0373687	0.0920321	0.0509434	TEX14	1	BP	upreg	Mast cell
GO:1990823	response to leukemia inhibitory factor	2026-01-07	105/18986	0.00952381	25.8313	4.90003	0.0380823	0.0920321	0.0509434	TEX14	1	BP	upreg	Mast cell
GO:0033045	regulation of sister chromatid segregation	2026-01-07	108/18986	0.00925926	25.1138	4.82632	0.0391518	0.0926859	0.0513052	TEX14	1	BP	upreg	Mast cell
GO:0051303	establishment of chromosome localization	2026-01-07	115/18986	0.00869565	23.5851	4.66542	0.0416434	0.0966127	0.0534789	TEX14	1	BP	upreg	Mast cell
GO:0007088	regulation of mitotic nuclear division	2026-01-07	121/18986	0.00826446	22.4156	4.5385	0.0437747	0.0981377	0.054323	TEX14	1	BP	upreg	Mast cell
GO:0050000	chromosome localization	2026-01-07	123/18986	0.00813008	22.0511	4.49821	0.0444842	0.0981377	0.054323	TEX14	1	BP	upreg	Mast cell
GO:0030510	regulation of BMP signaling pathway	2026-01-07	124/18986	0.00806452	21.8733	4.47842	0.0448388	0.0981377	0.054323	HTRA3	1	BP	upreg	Mast cell
GO:0030512	negative regulation of transforming growth factor beta receptor signaling pathway	2026-01-07	132/18986	0.00757576	20.5476	4.32809	0.0476714	0.102405	0.0566853	HTRA3	1	BP	upreg	Mast cell
GO:0051983	regulation of chromosome segregation	2026-01-07	135/18986	0.00740741	20.091	4.2751	0.0487318	0.10278	0.0568926	TEX14	1	BP	upreg	Mast cell
GO:0008376	acetylgalactosaminyltransferase activity	2026-01-06	34/18737	0.0294118	91.848	9.48927	0.0108397	0.0607064	0.039324	EXTL2	1	MF	upreg	Mast cell
GO:0005484	SNAP receptor activity	2026-01-06	37/18737	0.027027	84.4009	9.08834	0.0117914	0.0607064	0.039324	BET1L	1	MF	upreg	Mast cell
GO:0008375	acetylglucosaminyltransferase activity	2026-01-06	44/18737	0.0227273	70.9735	8.31676	0.0140092	0.0607064	0.039324	EXTL2	1	MF	upreg	Mast cell
GO:0030145	manganese ion binding	2026-01-06	68/18737	0.0147059	45.924	6.64211	0.0215813	0.0701394	0.0454344	EXTL2	1	MF	upreg	Mast cell
GO:0008194	UDP-glycosyltransferase activity	2026-01-06	145/18737	0.00689655	21.5368	4.44311	0.0455491	0.089648	0.0580716	EXTL2	1	MF	upreg	Mast cell
GO:0098992	neuronal dense core vesicle	2026-01-07	29/19960	0.0344828	98.3251	9.82367	0.0101276	0.0798476	0.0543853	CADPS	1	CC	upreg	Mast cell
GO:0031045	dense core granule	2026-01-07	42/19960	0.0238095	67.8912	8.12802	0.014639	0.0798476	0.0543853	CADPS	1	CC	upreg	Mast cell
GO:0031201	SNARE complex	2026-01-07	50/19960	0.02	57.0286	7.42973	0.0174064	0.0798476	0.0543853	BET1L	1	CC	upreg	Mast cell
GO:0000421	autophagosome membrane	2026-01-07	54/19960	0.0185185	52.8042	7.13977	0.0187877	0.0798476	0.0543853	TM9SF1	1	CC	upreg	Mast cell
GO:0045171	intercellular bridge	2026-01-07	92/19960	0.0108696	30.9938	5.40085	0.0318265	0.10821	0.0737035	TEX14	1	CC	upreg	Mast cell
GO:0005776	autophagosome	2026-01-07	118/19960	0.00847458	24.1646	4.72703	0.040662	0.115209	0.0784706	TM9SF1	1	CC	upreg	Mast cell
GO:0030198	extracellular matrix organization	17/180	339/18986	0.0501475	5.28945	7.79632	2.58438e-08	2.3706e-05	2.06547e-05	DDR2/TGFB2/EMILIN1/FAP/COL8A1/ABI3BP/ITGA2/COL19A1/LAMB1/CSGALNACT1/MATN2/COL27A1/COL4A2/FLRT2/THSD4/ADAMTSL3/ADAMTS5	17	BP	downreg	Mast cell
GO:0043062	extracellular structure organization	17/180	340/18986	0.05	5.27389	7.77971	2.69818e-08	2.3706e-05	2.06547e-05	DDR2/TGFB2/EMILIN1/FAP/COL8A1/ABI3BP/ITGA2/COL19A1/LAMB1/CSGALNACT1/MATN2/COL27A1/COL4A2/FLRT2/THSD4/ADAMTSL3/ADAMTS5	17	BP	downreg	Mast cell
GO:0045229	external encapsulating structure organization	17/180	341/18986	0.0498534	5.25842	7.76315	2.81655e-08	2.3706e-05	2.06547e-05	DDR2/TGFB2/EMILIN1/FAP/COL8A1/ABI3BP/ITGA2/COL19A1/LAMB1/CSGALNACT1/MATN2/COL27A1/COL4A2/FLRT2/THSD4/ADAMTSL3/ADAMTS5	17	BP	downreg	Mast cell
GO:0060537	muscle tissue development	15/180	447/18986	0.033557	3.53952	5.31565	2.45181e-05	0.0150004	0.0130697	TNN/TGFB2/NEB/MYL3/PITX1/PDGFRB/COL19A1/SYNE1/HEY1/PRKG1/FGFR2/YAP1/CDON/ERBB3/EFNB2	15	BP	downreg	Mast cell
GO:0048738	cardiac muscle tissue development	11/180	252/18986	0.0436508	4.60419	5.6349	2.97038e-05	0.0150004	0.0130697	TGFB2/NEB/MYL3/PDGFRB/SYNE1/HEY1/PRKG1/FGFR2/YAP1/ERBB3/EFNB2	11	BP	downreg	Mast cell
GO:0014706	striated muscle tissue development	14/180	424/18986	0.0330189	3.48276	5.05822	5.48313e-05	0.0212218	0.0184903	TGFB2/NEB/MYL3/PITX1/PDGFRB/COL19A1/SYNE1/HEY1/PRKG1/FGFR2/YAP1/CDON/ERBB3/EFNB2	14	BP	downreg	Mast cell
GO:0035265	organ growth	9/180	181/18986	0.0497238	5.24475	5.61369	5.88328e-05	0.0212218	0.0184903	DDR2/TGFB2/FGF10/RSPO2/COL27A1/PRKG1/FGFR2/YAP1/RARG	9	BP	downreg	Mast cell
GO:0071600	otic vesicle morphogenesis	3/180	10/18986	0.3	31.6433	9.48259	9.57609e-05	0.0242365	0.0211169	FGF10/STOX1/FGFR2	3	BP	downreg	Mast cell
GO:1905314	semi-lunar valve development	5/180	49/18986	0.102041	10.763	6.69454	9.85398e-05	0.0242365	0.0211169	TGFB2/EMILIN1/HEY1/CDH11/ADAMTS5	5	BP	downreg	Mast cell
GO:0045860	positive regulation of protein kinase activity	10/180	243/18986	0.0411523	4.34065	5.12753	0.000111914	0.0242365	0.0211169	DDR2/TGFB2/NEK10/PDGFRB/SASH1/DAB2IP/STOX1/FLT1/CEMIP/MAP2K3	10	BP	downreg	Mast cell
GO:0030111	regulation of Wnt signaling pathway	12/180	349/18986	0.034384	3.62674	4.84547	0.000129353	0.0242365	0.0211169	PTPRU/TNN/FGF10/CDK14/MDFIC/RSPO2/CCN4/WNK2/DAB2IP/FGFR2/YAP1/NKD1	12	BP	downreg	Mast cell
GO:2001222	regulation of neuron migration	5/180	52/18986	0.0961538	10.1421	6.45832	0.000131257	0.0242365	0.0211169	TNN/UNC5C/DAB2IP/FLRT2/FLNA	5	BP	downreg	Mast cell
GO:0003416	endochondral bone growth	4/180	28/18986	0.142857	15.0683	7.28813	0.000133902	0.0242365	0.0211169	DDR2/COL27A1/FGFR2/RARG	4	BP	downreg	Mast cell
GO:0033002	muscle cell proliferation	10/180	252/18986	0.0396825	4.18563	4.9805	0.00015068	0.0242365	0.0211169	DDR2/TGFB2/ITGA2/PDGFRB/CCN4/PRKG1/FGFR2/YAP1/TAFA5/IRAK1	10	BP	downreg	Mast cell
GO:0003401	axis elongation	4/180	29/18986	0.137931	14.5487	7.14338	0.000154182	0.0242365	0.0211169	FGF10/FGFR2/YAP1/NKD1	4	BP	downreg	Mast cell
GO:0045765	regulation of angiogenesis	12/180	360/18986	0.0333333	3.51593	4.71501	0.000172593	0.0242365	0.0211169	DDAH1/TNN/TGFB2/EMILIN1/SASH1/THBS2/DAB2IP/ETS1/FLT1/COL4A2/PAK4/TAFA5	12	BP	downreg	Mast cell
GO:0051216	cartilage development	9/180	209/18986	0.0430622	4.54211	5.0375	0.000176033	0.0242365	0.0211169	MBOAT2/PTH1R/CYTL1/PITX1/CSGALNACT1/RSPO2/CCN4/COL27A1/RARG	9	BP	downreg	Mast cell
GO:0060441	epithelial tube branching involved in lung morphogenesis	4/180	30/18986	0.133333	14.0637	7.00563	0.000176592	0.0242365	0.0211169	FGF10/RSPO2/FGFR2/YAP1	4	BP	downreg	Mast cell
GO:0033674	positive regulation of kinase activity	10/180	258/18986	0.0387597	4.08829	4.88624	0.000182373	0.0242365	0.0211169	DDR2/TGFB2/NEK10/PDGFRB/SASH1/DAB2IP/STOX1/FLT1/CEMIP/MAP2K3	10	BP	downreg	Mast cell
GO:0098868	bone growth	4/180	31/18986	0.129032	13.61	6.8743	0.00020126	0.0254091	0.0221386	DDR2/COL27A1/FGFR2/RARG	4	BP	downreg	Mast cell
GO:1901342	regulation of vasculature development	12/180	369/18986	0.0325203	3.43017	4.61199	0.000216649	0.0260495	0.0226966	DDAH1/TNN/TGFB2/EMILIN1/SASH1/THBS2/DAB2IP/ETS1/FLT1/COL4A2/PAK4/TAFA5	12	BP	downreg	Mast cell
GO:0042692	muscle cell differentiation	13/180	432/18986	0.0300926	3.1741	4.47194	0.00025274	0.0268279	0.0233748	OBSCN/NEB/FGF10/PDGFRB/SYNE1/LAMB1/HEY1/PRKG1/FGFR2/CDON/EFNB2/RORA/ADAMTS5	13	BP	downreg	Mast cell
GO:0014910	regulation of smooth muscle cell migration	6/180	93/18986	0.0645161	6.80502	5.4902	0.000257318	0.0268279	0.0233748	DDR2/ITGA2/PDGFRB/CCN4/PRKG1/TAFA5	6	BP	downreg	Mast cell
GO:0048660	regulation of smooth muscle cell proliferation	8/180	174/18986	0.045977	4.84955	4.99069	0.00025984	0.0268279	0.0233748	DDR2/ITGA2/PDGFRB/CCN4/PRKG1/FGFR2/TAFA5/IRAK1	8	BP	downreg	Mast cell
GO:0045785	positive regulation of cell adhesion	14/180	499/18986	0.0280561	2.9593	4.33921	0.000299439	0.0268279	0.0233748	PTPRU/TGFB2/EMILIN1/COL8A1/ABI3BP/ITGA2/GCNT2/HLA-DRB5/CARD11/LAMB1/ETS1/EFNB2/IRAK1/FLNA	14	BP	downreg	Mast cell
GO:0003179	heart valve morphogenesis	5/180	62/18986	0.0806452	8.50627	5.79171	0.000302775	0.0268279	0.0233748	TGFB2/EMILIN1/HEY1/CDH11/ADAMTS5	5	BP	downreg	Mast cell
GO:0045599	negative regulation of fat cell differentiation	5/180	62/18986	0.0806452	8.50627	5.79171	0.000302775	0.0268279	0.0233748	ENPP1/RUNX1T1/CCN4/YAP1/RORA	5	BP	downreg	Mast cell
GO:0048659	smooth muscle cell proliferation	8/180	178/18986	0.0449438	4.74057	4.90535	0.000302969	0.0268279	0.0233748	DDR2/ITGA2/PDGFRB/CCN4/PRKG1/FGFR2/TAFA5/IRAK1	8	BP	downreg	Mast cell
GO:0060828	regulation of canonical Wnt signaling pathway	10/180	276/18986	0.0362319	3.82166	4.61972	0.000312999	0.0268279	0.0233748	PTPRU/TNN/FGF10/CDK14/RSPO2/WNK2/DAB2IP/FGFR2/YAP1/NKD1	10	BP	downreg	Mast cell
GO:0046777	protein autophosphorylation	8/180	180/18986	0.0444444	4.6879	4.86363	0.000326629	0.0268279	0.0233748	DDR2/NEK10/PDGFRB/ENPP1/WNK2/FGFR2/FLT1/IRAK1	8	BP	downreg	Mast cell
GO:0060070	canonical Wnt signaling pathway	11/180	332/18986	0.0331325	3.49475	4.48645	0.000338994	0.0268279	0.0233748	PTPRU/TNN/FGF10/CDK14/RSPO2/WNK2/DAB2IP/FGFR2/YAP1/RARG/NKD1	11	BP	downreg	Mast cell
GO:0038065	collagen-activated signaling pathway	3/180	15/18986	0.2	21.0956	7.61717	0.000350622	0.0268279	0.0233748	DDR2/ITGA2/COL4A2	3	BP	downreg	Mast cell
GO:0071599	otic vesicle development	3/180	15/18986	0.2	21.0956	7.61717	0.000350622	0.0268279	0.0233748	FGF10/STOX1/FGFR2	3	BP	downreg	Mast cell
GO:0014909	smooth muscle cell migration	6/180	100/18986	0.06	6.32867	5.22687	0.000381043	0.028298	0.0246557	DDR2/ITGA2/PDGFRB/CCN4/PRKG1/TAFA5	6	BP	downreg	Mast cell
GO:0048661	positive regulation of smooth muscle cell proliferation	6/180	101/18986	0.0594059	6.26601	5.19131	0.000401965	0.0289989	0.0252664	DDR2/ITGA2/PDGFRB/CCN4/FGFR2/IRAK1	6	BP	downreg	Mast cell
GO:0035909	aorta morphogenesis	4/180	38/18986	0.105263	11.1029	6.09889	0.000448362	0.0310661	0.0270675	TGFB2/PDGFRB/HEY1/EFNB2	4	BP	downreg	Mast cell
GO:0061448	connective tissue development	10/180	290/18986	0.0344828	3.63716	4.42747	0.000462039	0.0310661	0.0270675	MBOAT2/PTH1R/CYTL1/PITX1/PDGFRB/CSGALNACT1/RSPO2/CCN4/COL27A1/RARG	10	BP	downreg	Mast cell
GO:0003180	aortic valve morphogenesis	4/180	39/18986	0.102564	10.8182	6.00466	0.000495933	0.0310661	0.0270675	EMILIN1/HEY1/CDH11/ADAMTS5	4	BP	downreg	Mast cell
GO:0010632	regulation of epithelial cell migration	5/180	69/18986	0.0724638	7.64332	5.4085	0.000498512	0.0310661	0.0270675	TGFB2/FGF10/ITGA2/SASH1/DAB2IP	5	BP	downreg	Mast cell
GO:0051897	positive regulation of phosphatidylinositol 3-kinase/protein kinase B signal transduction	8/180	192/18986	0.0416667	4.39491	4.62554	0.000502329	0.0310661	0.0270675	DDR2/TGFB2/PDGFRB/GCNT2/STOX1/ERBB3/FLT1/RASD2	8	BP	downreg	Mast cell
GO:0045598	regulation of fat cell differentiation	7/180	147/18986	0.047619	5.02275	4.79012	0.000511767	0.0310661	0.0270675	CDS1/ENPP1/RUNX1T1/CCN4/YAP1/RORA/ZBTB7C	7	BP	downreg	Mast cell
GO:0046068	cGMP metabolic process	3/180	17/18986	0.176471	18.6137	7.10799	0.000516743	0.0310661	0.0270675	GUCY1B1/GUCY1A2/RORA	3	BP	downreg	Mast cell
GO:0043410	positive regulation of MAPK cascade	13/180	472/18986	0.0275424	2.90511	4.10047	0.000585085	0.0343568	0.0299346	TGFB2/NEK10/FGF10/PDGFRB/GCNT2/SASH1/DAB2IP/FGFR2/CDON/TNFRSF19/FLT1/NKD1/MAP2K3	13	BP	downreg	Mast cell
GO:0030177	positive regulation of Wnt signaling pathway	7/180	152/18986	0.0460526	4.85753	4.67146	0.000624752	0.0355071	0.0309369	FGF10/RSPO2/CCN4/WNK2/FGFR2/YAP1/NKD1	7	BP	downreg	Mast cell
GO:0016055	Wnt signaling pathway	13/180	476/18986	0.0273109	2.8807	4.06548	0.0006328	0.0355071	0.0309369	PTPRU/TNN/FGF10/CDK14/MDFIC/RSPO2/CCN4/WNK2/DAB2IP/FGFR2/YAP1/RARG/NKD1	13	BP	downreg	Mast cell
GO:0051347	positive regulation of transferase activity	10/180	304/18986	0.0328947	3.46966	4.24675	0.000665875	0.0360939	0.0314482	DDR2/TGFB2/NEK10/PDGFRB/SASH1/DAB2IP/STOX1/FLT1/CEMIP/MAP2K3	10	BP	downreg	Mast cell
GO:0045444	fat cell differentiation	9/180	251/18986	0.0358566	3.78207	4.34082	0.000671847	0.0360939	0.0314482	CDS1/FGF10/ENPP1/RUNX1T1/CCN4/YAP1/RORA/PEX11A/ZBTB7C	9	BP	downreg	Mast cell
GO:0003170	heart valve development	5/180	75/18986	0.0666667	7.03185	5.12056	0.000731389	0.0384741	0.033522	TGFB2/EMILIN1/HEY1/CDH11/ADAMTS5	5	BP	downreg	Mast cell
GO:0014812	muscle cell migration	6/180	114/18986	0.0526316	5.55146	4.76857	0.000764487	0.0393945	0.0343239	DDR2/ITGA2/PDGFRB/CCN4/PRKG1/TAFA5	6	BP	downreg	Mast cell
GO:0043406	positive regulation of MAP kinase activity	5/180	77/18986	0.0649351	6.84921	5.03155	0.000824618	0.0394271	0.0343523	NEK10/PDGFRB/SASH1/DAB2IP/FLT1	5	BP	downreg	Mast cell
GO:0002062	chondrocyte differentiation	6/180	116/18986	0.0517241	5.45575	4.70931	0.000837442	0.0394271	0.0343523	MBOAT2/PTH1R/CYTL1/CCN4/COL27A1/RARG	6	BP	downreg	Mast cell
GO:0003184	pulmonary valve morphogenesis	3/180	20/18986	0.15	15.8217	6.4881	0.000848373	0.0394271	0.0343523	TGFB2/HEY1/ADAMTS5	3	BP	downreg	Mast cell
GO:0060602	branch elongation of an epithelium	3/180	20/18986	0.15	15.8217	6.4881	0.000848373	0.0394271	0.0343523	FGF10/FGFR2/YAP1	3	BP	downreg	Mast cell
GO:0003176	aortic valve development	4/180	45/18986	0.0888889	9.3758	5.50332	0.00085952	0.0394271	0.0343523	EMILIN1/HEY1/CDH11/ADAMTS5	4	BP	downreg	Mast cell
GO:0010712	regulation of collagen metabolic process	4/180	45/18986	0.0888889	9.3758	5.50332	0.00085952	0.0394271	0.0343523	DDR2/EMILIN1/FAP/ITGA2	4	BP	downreg	Mast cell
GO:0035924	cellular response to vascular endothelial growth factor stimulus	5/180	78/18986	0.0641026	6.7614	4.98822	0.000874422	0.0394271	0.0343523	EMILIN1/PDGFRB/DAB2IP/FLT1/MAP2K3	5	BP	downreg	Mast cell
GO:0010837	regulation of keratinocyte proliferation	4/180	48/18986	0.0833333	8.78981	5.28657	0.00109798	0.0477562	0.0416094	FGF10/FGFR2/YAP1/EFNB2	4	BP	downreg	Mast cell
GO:0060348	bone development	8/180	217/18986	0.0368664	3.88858	4.18685	0.00111465	0.0477562	0.0416094	DHRS3/DDR2/TNN/CSGALNACT1/CCN4/COL27A1/FGFR2/RARG	8	BP	downreg	Mast cell
GO:0042060	wound healing	12/180	444/18986	0.027027	2.85075	3.8606	0.00111589	0.0477562	0.0416094	DDR2/TGFB2/EMILIN1/FAP/FGF10/ITGA2/CCN4/PRKG1/YAP1/ERBB3/TAFA5/FLNA	12	BP	downreg	Mast cell
GO:0003007	heart morphogenesis	9/180	274/18986	0.0328467	3.4646	4.02027	0.00124463	0.052378	0.0456363	DHRS3/TGFB2/MYL3/HEY1/FGFR2/YAP1/FLRT2/ADAMTS5/FLNA	9	BP	downreg	Mast cell
GO:0043123	positive regulation of canonical NF-kappaB signal transduction	8/180	223/18986	0.0358744	3.78396	4.09126	0.00132644	0.0549061	0.047839	PLEKHG5/CXXC5/CARD11/DAB2IP/TNFRSF19/TMEM101/IRAK1/FLNA	8	BP	downreg	Mast cell
GO:0014911	positive regulation of smooth muscle cell migration	4/180	51/18986	0.0784314	8.27277	5.08798	0.00137939	0.0550821	0.0479924	DDR2/ITGA2/PDGFRB/CCN4	4	BP	downreg	Mast cell
GO:0038084	vascular endothelial growth factor signaling pathway	4/180	51/18986	0.0784314	8.27277	5.08798	0.00137939	0.0550821	0.0479924	EMILIN1/PDGFRB/DAB2IP/FLT1	4	BP	downreg	Mast cell
GO:0001503	ossification	12/180	456/18986	0.0263158	2.77573	3.75505	0.00139916	0.0550821	0.0479924	DHRS3/DDR2/TNN/PTH1R/PPARGC1B/ENPP1/CSGALNACT1/RSPO2/CCN4/FGFR2/YAP1/CDH11	12	BP	downreg	Mast cell
GO:0051896	regulation of phosphatidylinositol 3-kinase/protein kinase B signal transduction	9/180	280/18986	0.0321429	3.39036	3.94225	0.00144556	0.0550821	0.0479924	DDR2/TGFB2/PDGFRB/GCNT2/DAB2IP/STOX1/ERBB3/FLT1/RASD2	9	BP	downreg	Mast cell
GO:0003177	pulmonary valve development	3/180	24/18986	0.125	13.1847	5.84349	0.00146487	0.0550821	0.0479924	TGFB2/HEY1/ADAMTS5	3	BP	downreg	Mast cell
GO:0007263	nitric oxide mediated signal transduction	3/180	24/18986	0.125	13.1847	5.84349	0.00146487	0.0550821	0.0479924	DDAH1/GUCY1B1/GUCY1A2	3	BP	downreg	Mast cell
GO:0003197	endocardial cushion development	4/180	52/18986	0.0769231	8.11368	5.02537	0.0014834	0.0550821	0.0479924	TGFB2/HEY1/ERBB3/ADAMTS5	4	BP	downreg	Mast cell
GO:0060485	mesenchyme development	10/180	341/18986	0.0293255	3.09319	3.81591	0.00158285	0.057923	0.0504676	TGFB2/FGF10/GCNT2/HEY1/DAB2IP/FGFR2/YAP1/ERBB3/ADAMTS5/FLNA	10	BP	downreg	Mast cell
GO:1903034	regulation of response to wounding	7/180	181/18986	0.038674	4.07925	4.07231	0.00172646	0.0622757	0.05426	DDR2/EMILIN1/FAP/CCN4/PRKG1/TAFA5/FLNA	7	BP	downreg	Mast cell
GO:0060425	lung morphogenesis	4/180	55/18986	0.0727273	7.67111	4.84715	0.00182805	0.0650117	0.0566439	FGF10/RSPO2/FGFR2/YAP1	4	BP	downreg	Mast cell
GO:0060740	prostate gland epithelium morphogenesis	3/180	26/18986	0.115385	12.1705	5.57614	0.00185577	0.0650809	0.0567041	FGF10/FGFR2/RARG	3	BP	downreg	Mast cell
GO:0042327	positive regulation of phosphorylation	12/180	479/18986	0.0250522	2.64245	3.56193	0.00210886	0.0723109	0.0630036	DDR2/TGFB2/NEK10/FGF10/PPARGC1B/PDGFRB/SASH1/DAB2IP/STOX1/FLT1/CEMIP/MAP2K3	12	BP	downreg	Mast cell
GO:0030900	forebrain development	11/180	416/18986	0.0264423	2.78908	3.60963	0.00211921	0.0723109	0.0630036	POU3F3/FGF10/PITX1/OGDH/LAMB1/DAB2IP/PRKG1/FGFR2/CDON/PCDH9/FLNA	11	BP	downreg	Mast cell
GO:0061041	regulation of wound healing	6/180	140/18986	0.0428571	4.52048	4.09024	0.00219804	0.0723219	0.0630131	DDR2/EMILIN1/FAP/CCN4/PRKG1/TAFA5	6	BP	downreg	Mast cell
GO:0001764	neuron migration	7/180	189/18986	0.037037	3.90658	3.92883	0.00220546	0.0723219	0.0630131	TNN/UNC5C/MATN2/DAB2IP/PRKG1/FLRT2/FLNA	7	BP	downreg	Mast cell
GO:0045766	positive regulation of angiogenesis	7/180	189/18986	0.037037	3.90658	3.92883	0.00220546	0.0723219	0.0630131	DDAH1/TNN/EMILIN1/SASH1/ETS1/FLT1/PAK4	7	BP	downreg	Mast cell
GO:0035116	embryonic hindlimb morphogenesis	3/180	28/18986	0.107143	11.3012	5.33659	0.00230602	0.0729365	0.0635486	PITX1/RSPO2/RARG	3	BP	downreg	Mast cell
GO:0060512	prostate gland morphogenesis	3/180	28/18986	0.107143	11.3012	5.33659	0.00230602	0.0729365	0.0635486	FGF10/FGFR2/RARG	3	BP	downreg	Mast cell
GO:0010631	epithelial cell migration	5/180	97/18986	0.0515464	5.437	4.28612	0.00231086	0.0729365	0.0635486	TGFB2/FGF10/ITGA2/SASH1/DAB2IP	5	BP	downreg	Mast cell
GO:0071902	positive regulation of protein serine/threonine kinase activity	6/180	142/18986	0.0422535	4.45681	4.04507	0.00236019	0.0735739	0.064104	NEK10/PDGFRB/SASH1/DAB2IP/FLT1/CEMIP	6	BP	downreg	Mast cell
GO:1904018	positive regulation of vasculature development	7/180	192/18986	0.0364583	3.84554	3.87703	0.00240939	0.0741917	0.0646422	DDAH1/TNN/EMILIN1/SASH1/ETS1/FLT1/PAK4	7	BP	downreg	Mast cell
GO:0043616	keratinocyte proliferation	4/180	60/18986	0.0666667	7.03185	4.57815	0.00251962	0.0765907	0.0667325	FGF10/FGFR2/YAP1/EFNB2	4	BP	downreg	Mast cell
GO:0043122	regulation of canonical NF-kappaB signal transduction	9/180	305/18986	0.0295082	3.11246	3.63858	0.00258185	0.0765907	0.0667325	PLEKHG5/CXXC5/CARD11/DAB2IP/TNFRSF19/RORA/TMEM101/IRAK1/FLNA	9	BP	downreg	Mast cell
GO:0045859	regulation of protein kinase activity	11/180	427/18986	0.0257611	2.71723	3.51122	0.00259203	0.0765907	0.0667325	DDR2/TGFB2/NEK10/PDGFRB/PKIB/SASH1/DAB2IP/STOX1/FLT1/CEMIP/MAP2K3	11	BP	downreg	Mast cell
GO:0060349	bone morphogenesis	5/180	100/18986	0.05	5.27389	4.19224	0.00263897	0.0765907	0.0667325	DHRS3/CSGALNACT1/COL27A1/FGFR2/RARG	5	BP	downreg	Mast cell
GO:0090132	epithelium migration	5/180	100/18986	0.05	5.27389	4.19224	0.00263897	0.0765907	0.0667325	TGFB2/FGF10/ITGA2/SASH1/DAB2IP	5	BP	downreg	Mast cell
GO:0022029	telencephalon cell migration	4/180	62/18986	0.0645161	6.80502	4.47905	0.00284047	0.0805864	0.0702139	POU3F3/OGDH/LAMB1/DAB2IP	4	BP	downreg	Mast cell
GO:0048010	vascular endothelial growth factor receptor signaling pathway	4/180	62/18986	0.0645161	6.80502	4.47905	0.00284047	0.0805864	0.0702139	EMILIN1/FGF10/DAB2IP/FLT1	4	BP	downreg	Mast cell
GO:0008347	glial cell migration	4/180	63/18986	0.0634921	6.697	4.43113	0.00301092	0.084473	0.0736003	TGFB2/LAMB1/MATN2/DAB2IP	4	BP	downreg	Mast cell
GO:0035107	appendage morphogenesis	6/180	151/18986	0.0397351	4.19117	3.85167	0.00320372	0.0879282	0.0766107	TGFB2/FGF10/PITX1/RSPO2/FGFR2/RARG	6	BP	downreg	Mast cell
GO:0035108	limb morphogenesis	6/180	151/18986	0.0397351	4.19117	3.85167	0.00320372	0.0879282	0.0766107	TGFB2/FGF10/PITX1/RSPO2/FGFR2/RARG	6	BP	downreg	Mast cell
GO:0090130	tissue migration	5/180	105/18986	0.047619	5.02275	4.04388	0.00325899	0.0884832	0.0770943	TGFB2/FGF10/ITGA2/SASH1/DAB2IP	5	BP	downreg	Mast cell
GO:0043491	phosphatidylinositol 3-kinase/protein kinase B signal transduction	9/180	317/18986	0.0283912	2.99464	3.5037	0.00333441	0.0895679	0.0780394	DDR2/TGFB2/PDGFRB/GCNT2/DAB2IP/STOX1/ERBB3/FLT1/RASD2	9	BP	downreg	Mast cell
GO:0021885	forebrain cell migration	4/180	65/18986	0.0615385	6.49094	4.33835	0.00337252	0.089638	0.0781005	POU3F3/OGDH/LAMB1/DAB2IP	4	BP	downreg	Mast cell
GO:0031069	hair follicle morphogenesis	3/180	33/18986	0.0909091	9.58889	4.83113	0.00370967	0.0959653	0.0836133	TGFB2/FGF10/FGFR2	3	BP	downreg	Mast cell
GO:0048566	embryonic digestive tract development	3/180	33/18986	0.0909091	9.58889	4.83113	0.00370967	0.0959653	0.0836133	TGFB2/FGF10/FGFR2	3	BP	downreg	Mast cell
GO:0034394	protein localization to cell surface	4/180	67/18986	0.0597015	6.29718	4.24939	0.0037626	0.0959653	0.0836133	PTPRU/FGF10/SNX33/FLNA	4	BP	downreg	Mast cell
GO:0035904	aorta development	4/180	67/18986	0.0597015	6.29718	4.24939	0.0037626	0.0959653	0.0836133	TGFB2/PDGFRB/HEY1/EFNB2	4	BP	downreg	Mast cell
GO:1902224	ketone body metabolic process	2/180	10/18986	0.2	21.0956	6.21858	0.00382618	0.096611	0.0841759	HMGCLL1/ACSS3	2	BP	downreg	Mast cell
GO:0007435	salivary gland morphogenesis	3/180	34/18986	0.0882353	9.30686	4.74288	0.00404059	0.100058	0.0871789	TGFB2/FGF10/FGFR2	3	BP	downreg	Mast cell
GO:0007249	canonical NF-kappaB signal transduction	9/180	327/18986	0.0275229	2.90306	3.39606	0.0040852	0.100058	0.0871789	PLEKHG5/CXXC5/CARD11/DAB2IP/TNFRSF19/RORA/TMEM101/IRAK1/FLNA	9	BP	downreg	Mast cell
GO:0001934	positive regulation of protein phosphorylation	11/180	455/18986	0.0241758	2.55001	3.27405	0.00418892	0.100058	0.0871789	DDR2/TGFB2/NEK10/FGF10/PDGFRB/SASH1/DAB2IP/STOX1/FLT1/CEMIP/MAP2K3	11	BP	downreg	Mast cell
GO:0016525	negative regulation of angiogenesis	6/180	160/18986	0.0375	3.95542	3.67276	0.00425417	0.100058	0.0871789	TGFB2/EMILIN1/THBS2/DAB2IP/COL4A2/TAFA5	6	BP	downreg	Mast cell
GO:0048384	retinoic acid receptor signaling pathway	3/180	35/18986	0.0857143	9.04095	4.65821	0.00438891	0.100058	0.0871789	DHRS3/ESRRG/RARG	3	BP	downreg	Mast cell
GO:2000181	negative regulation of blood vessel morphogenesis	6/180	162/18986	0.037037	3.90658	3.63478	0.00451854	0.100058	0.0871789	TGFB2/EMILIN1/THBS2/DAB2IP/COL4A2/TAFA5	6	BP	downreg	Mast cell
GO:0043549	regulation of kinase activity	11/180	460/18986	0.023913	2.52229	3.23355	0.00454283	0.100058	0.0871789	DDR2/TGFB2/NEK10/PDGFRB/PKIB/SASH1/DAB2IP/STOX1/FLT1/CEMIP/MAP2K3	11	BP	downreg	Mast cell
GO:0003208	cardiac ventricle morphogenesis	4/180	71/18986	0.056338	5.94241	4.08186	0.00463229	0.100058	0.0871789	TGFB2/MYL3/HEY1/FGFR2	4	BP	downreg	Mast cell
GO:0006024	glycosaminoglycan biosynthetic process	4/180	71/18986	0.056338	5.94241	4.08186	0.00463229	0.100058	0.0871789	ST3GAL6/GCNT2/CSGALNACT1/CEMIP	4	BP	downreg	Mast cell
GO:0006182	cGMP biosynthetic process	2/180	11/18986	0.181818	19.1778	5.89983	0.00464739	0.100058	0.0871789	GUCY1B1/GUCY1A2	2	BP	downreg	Mast cell
GO:0016479	negative regulation of transcription by RNA polymerase I	2/180	11/18986	0.181818	19.1778	5.89983	0.00464739	0.100058	0.0871789	DEDD/FLNA	2	BP	downreg	Mast cell
GO:0021860	pyramidal neuron development	2/180	11/18986	0.181818	19.1778	5.89983	0.00464739	0.100058	0.0871789	OGDH/FGFR2	2	BP	downreg	Mast cell
GO:0030948	negative regulation of vascular endothelial growth factor receptor signaling pathway	2/180	11/18986	0.181818	19.1778	5.89983	0.00464739	0.100058	0.0871789	EMILIN1/DAB2IP	2	BP	downreg	Mast cell
GO:0038063	collagen-activated tyrosine kinase receptor signaling pathway	2/180	11/18986	0.181818	19.1778	5.89983	0.00464739	0.100058	0.0871789	DDR2/COL4A2	2	BP	downreg	Mast cell
GO:0048251	elastic fiber assembly	2/180	11/18986	0.181818	19.1778	5.89983	0.00464739	0.100058	0.0871789	EMILIN1/THSD4	2	BP	downreg	Mast cell
GO:0060601	lateral sprouting from an epithelium	2/180	11/18986	0.181818	19.1778	5.89983	0.00464739	0.100058	0.0871789	FGF10/FGFR2	2	BP	downreg	Mast cell
GO:0019934	cGMP-mediated signaling	3/180	36/18986	0.0833333	8.78981	4.57685	0.00475489	0.100058	0.0871789	GUCY1B1/PRKG1/GUCY1A2	3	BP	downreg	Mast cell
GO:0030947	regulation of vascular endothelial growth factor receptor signaling pathway	3/180	36/18986	0.0833333	8.78981	4.57685	0.00475489	0.100058	0.0871789	EMILIN1/FGF10/DAB2IP	3	BP	downreg	Mast cell
GO:0035137	hindlimb morphogenesis	3/180	36/18986	0.0833333	8.78981	4.57685	0.00475489	0.100058	0.0871789	PITX1/RSPO2/RARG	3	BP	downreg	Mast cell
GO:0010976	positive regulation of neuron projection development	6/180	164/18986	0.0365854	3.85894	3.59739	0.00479484	0.100058	0.0871789	DDR2/TNN/NCKIPSD/SERPINI1/DAB2IP/FLNA	6	BP	downreg	Mast cell
GO:1901343	negative regulation of vasculature development	6/180	164/18986	0.0365854	3.85894	3.59739	0.00479484	0.100058	0.0871789	TGFB2/EMILIN1/THBS2/DAB2IP/COL4A2/TAFA5	6	BP	downreg	Mast cell
GO:0030199	collagen fibril organization	4/180	72/18986	0.0555556	5.85988	4.04197	0.0048691	0.100774	0.0878034	DDR2/TGFB2/EMILIN1/COL27A1	4	BP	downreg	Mast cell
GO:0090263	positive regulation of canonical Wnt signaling pathway	5/180	116/18986	0.0431034	4.54646	3.74827	0.00498172	0.102267	0.0891039	FGF10/RSPO2/WNK2/FGFR2/YAP1	5	BP	downreg	Mast cell
GO:0007431	salivary gland development	3/180	37/18986	0.0810811	8.55225	4.4986	0.00513878	0.10298	0.0897248	TGFB2/FGF10/FGFR2	3	BP	downreg	Mast cell
GO:0021799	cerebral cortex radially oriented cell migration	3/180	37/18986	0.0810811	8.55225	4.4986	0.00513878	0.10298	0.0897248	POU3F3/LAMB1/DAB2IP	3	BP	downreg	Mast cell
GO:0048730	epidermis morphogenesis	3/180	37/18986	0.0810811	8.55225	4.4986	0.00513878	0.10298	0.0897248	TGFB2/FGF10/FGFR2	3	BP	downreg	Mast cell
GO:0035051	cardiocyte differentiation	6/180	167/18986	0.0359281	3.78962	3.54241	0.00523233	0.104029	0.0906389	TGFB2/NEB/PDGFRB/SYNE1/PRKG1/EFNB2	6	BP	downreg	Mast cell
GO:0060411	cardiac septum morphogenesis	4/180	74/18986	0.0540541	5.7015	3.9644	0.00536682	0.105048	0.0915271	DHRS3/TGFB2/HEY1/FGFR2	4	BP	downreg	Mast cell
GO:1903053	regulation of extracellular matrix organization	4/180	74/18986	0.0540541	5.7015	3.9644	0.00536682	0.105048	0.0915271	DDR2/EMILIN1/FAP/LAMB1	4	BP	downreg	Mast cell
GO:2001046	positive regulation of integrin-mediated signaling pathway	2/180	12/18986	0.166667	17.5796	5.62056	0.00554224	0.107647	0.0937917	LAMB1/FLNA	2	BP	downreg	Mast cell
GO:0006023	aminoglycan biosynthetic process	4/180	75/18986	0.0533333	5.62548	3.92666	0.00562797	0.108478	0.0945155	ST3GAL6/GCNT2/CSGALNACT1/CEMIP	4	BP	downreg	Mast cell
GO:0090596	sensory organ morphogenesis	8/180	285/18986	0.0280702	2.96078	3.26296	0.00593446	0.113519	0.0989077	COL8A1/FGF10/STOX1/CDH23/FGFR2/CDON/RARG/NKD1	8	BP	downreg	Mast cell
GO:0043405	regulation of MAP kinase activity	5/180	123/18986	0.0406504	4.28771	3.57878	0.00636632	0.119708	0.1043	NEK10/PDGFRB/SASH1/DAB2IP/FLT1	5	BP	downreg	Mast cell
GO:0032965	regulation of collagen biosynthetic process	3/180	40/18986	0.075	7.91083	4.2805	0.00640022	0.119708	0.1043	DDR2/EMILIN1/ITGA2	3	BP	downreg	Mast cell
GO:0052652	cyclic purine nucleotide metabolic process	3/180	40/18986	0.075	7.91083	4.2805	0.00640022	0.119708	0.1043	GUCY1B1/GUCY1A2/RORA	3	BP	downreg	Mast cell
GO:0009078	pyruvate family amino acid metabolic process	2/180	13/18986	0.153846	16.2274	5.37306	0.00650928	0.120852	0.105297	HMGCLL1/ILVBL	2	BP	downreg	Mast cell
GO:0003203	endocardial cushion morphogenesis	3/180	41/18986	0.0731707	7.71789	4.2128	0.006858	0.125482	0.10933	TGFB2/HEY1/ADAMTS5	3	BP	downreg	Mast cell
GO:0009187	cyclic nucleotide metabolic process	3/180	41/18986	0.0731707	7.71789	4.2128	0.006858	0.125482	0.10933	GUCY1B1/GUCY1A2/RORA	3	BP	downreg	Mast cell
GO:0070482	response to oxygen levels	9/180	358/18986	0.0251397	2.65168	3.08657	0.00727691	0.130523	0.113723	DDAH1/DDR2/TGFB2/GUCY1B1/ITGA2/FGFR2/GUCY1A2/RORA/IRAK1	9	BP	downreg	Mast cell
GO:1903036	positive regulation of response to wounding	4/180	81/18986	0.0493827	5.20878	3.71367	0.00737416	0.130523	0.113723	DDR2/EMILIN1/CCN4/FLNA	4	BP	downreg	Mast cell
GO:0070372	regulation of ERK1 and ERK2 cascade	8/180	296/18986	0.027027	2.85075	3.13966	0.00739257	0.130523	0.113723	EMILIN1/NEK10/FGF10/PDGFRB/GCNT2/WNK2/DAB2IP/FGFR2	8	BP	downreg	Mast cell
GO:0030282	bone mineralization	5/180	128/18986	0.0390625	4.12023	3.46527	0.00750728	0.130523	0.113723	DDR2/PTH1R/ENPP1/RSPO2/FGFR2	5	BP	downreg	Mast cell
GO:0003413	chondrocyte differentiation involved in endochondral bone morphogenesis	2/180	14/18986	0.142857	15.0683	5.15159	0.00754709	0.130523	0.113723	COL27A1/RARG	2	BP	downreg	Mast cell
GO:0046322	negative regulation of fatty acid oxidation	2/180	14/18986	0.142857	15.0683	5.15159	0.00754709	0.130523	0.113723	FMO2/ACADL	2	BP	downreg	Mast cell
GO:0060572	morphogenesis of an epithelial bud	2/180	14/18986	0.142857	15.0683	5.15159	0.00754709	0.130523	0.113723	FGF10/FGFR2	2	BP	downreg	Mast cell
GO:0070593	dendrite self-avoidance	2/180	14/18986	0.142857	15.0683	5.15159	0.00754709	0.130523	0.113723	TNN/EMB	2	BP	downreg	Mast cell
GO:0031589	cell-substrate adhesion	9/180	361/18986	0.0249307	2.62964	3.05837	0.0076656	0.131359	0.114451	TNN/EMILIN1/COL8A1/ABI3BP/ITGA2/GCNT2/LAMB1/CDH11/FLNA	9	BP	downreg	Mast cell
GO:0060560	developmental growth involved in morphogenesis	7/180	238/18986	0.0294118	3.10229	3.19298	0.00772176	0.131359	0.114451	TNN/FGF10/PRKG1/FGFR2/YAP1/RARG/NKD1	7	BP	downreg	Mast cell
GO:0003206	cardiac chamber morphogenesis	5/180	129/18986	0.0387597	4.08829	3.44326	0.00775148	0.131359	0.114451	DHRS3/TGFB2/MYL3/HEY1/FGFR2	5	BP	downreg	Mast cell
GO:0060412	ventricular septum morphogenesis	3/180	43/18986	0.0697674	7.35891	4.084	0.00783068	0.131599	0.114661	TGFB2/HEY1/FGFR2	3	BP	downreg	Mast cell
GO:0031214	biomineral tissue development	6/180	182/18986	0.032967	3.47729	3.28534	0.00786989	0.131599	0.114661	DDR2/PTH1R/ENPP1/HEY1/RSPO2/FGFR2	6	BP	downreg	Mast cell
GO:0021987	cerebral cortex development	5/180	130/18986	0.0384615	4.05684	3.42147	0.00800115	0.132474	0.115423	POU3F3/LAMB1/DAB2IP/CDON/FLNA	5	BP	downreg	Mast cell
GO:0048844	artery morphogenesis	4/180	83/18986	0.0481928	5.08327	3.64733	0.00802716	0.132474	0.115423	TGFB2/PDGFRB/HEY1/EFNB2	4	BP	downreg	Mast cell
GO:0001667	ameboidal-type cell migration	7/180	241/18986	0.0290456	3.06367	3.15427	0.00824349	0.134499	0.117187	DDR2/TGFB2/TNS1/FGF10/ITGA2/SASH1/DAB2IP	7	BP	downreg	Mast cell
GO:0055007	cardiac muscle cell differentiation	5/180	131/18986	0.0381679	4.02587	3.3999	0.00825635	0.134499	0.117187	NEB/PDGFRB/SYNE1/PRKG1/EFNB2	5	BP	downreg	Mast cell
GO:0001704	formation of primary germ layer	5/180	132/18986	0.0378788	3.99537	3.37854	0.00851715	0.137434	0.119744	COL8A1/ITGA2/LAMB1/FGFR2/COL4A2	5	BP	downreg	Mast cell
GO:0010919	regulation of inositol phosphate biosynthetic process	2/180	15/18986	0.133333	14.0637	4.95177	0.00865423	0.137434	0.119744	PTH1R/PRKG1	2	BP	downreg	Mast cell
GO:0021859	pyramidal neuron differentiation	2/180	15/18986	0.133333	14.0637	4.95177	0.00865423	0.137434	0.119744	OGDH/FGFR2	2	BP	downreg	Mast cell
GO:0048172	regulation of short-term neuronal synaptic plasticity	2/180	15/18986	0.133333	14.0637	4.95177	0.00865423	0.137434	0.119744	GRIK2/SYP	2	BP	downreg	Mast cell
GO:0007517	muscle organ development	9/180	369/18986	0.0243902	2.57263	2.98454	0.00877988	0.138418	0.120602	TGFB2/NEB/MYL3/PITX1/COL19A1/FGFR2/CDON/ERBB3/ITGB1BP2	9	BP	downreg	Mast cell
GO:0060428	lung epithelium development	3/180	45/18986	0.0666667	7.03185	3.96323	0.00888068	0.138418	0.120602	FGF10/FGFR2/YAP1	3	BP	downreg	Mast cell
GO:1901861	regulation of muscle tissue development	3/180	45/18986	0.0666667	7.03185	3.96323	0.00888068	0.138418	0.120602	TNN/CDON/ERBB3	3	BP	downreg	Mast cell
GO:0048736	appendage development	6/180	189/18986	0.031746	3.3485	3.17447	0.00938234	0.144454	0.125861	TGFB2/FGF10/PITX1/RSPO2/FGFR2/RARG	6	BP	downreg	Mast cell
GO:0060173	limb development	6/180	189/18986	0.031746	3.3485	3.17447	0.00938234	0.144454	0.125861	TGFB2/FGF10/PITX1/RSPO2/FGFR2/RARG	6	BP	downreg	Mast cell
GO:0008589	regulation of smoothened signaling pathway	4/180	87/18986	0.045977	4.84955	3.52082	0.00944454	0.14453	0.125927	FGF10/ENPP1/FGFR2/RORA	4	BP	downreg	Mast cell
GO:0042476	odontogenesis	5/180	136/18986	0.0367647	3.87786	3.29516	0.00961747	0.14629	0.12746	TGFB2/FGF10/LAMB1/RSPO2/FGFR2	5	BP	downreg	Mast cell
GO:0003188	heart valve formation	2/180	16/18986	0.125	13.1847	4.77019	0.00982933	0.148617	0.129488	HEY1/CDH11	2	BP	downreg	Mast cell
GO:0055010	ventricular cardiac muscle tissue morphogenesis	3/180	47/18986	0.0638298	6.73262	3.84961	0.0100092	0.150436	0.131073	TGFB2/MYL3/FGFR2	3	BP	downreg	Mast cell
GO:0001837	epithelial to mesenchymal transition	6/180	192/18986	0.03125	3.29618	3.12853	0.0100901	0.150755	0.131351	TGFB2/GCNT2/HEY1/DAB2IP/FGFR2/FLNA	6	BP	downreg	Mast cell
GO:0051146	striated muscle cell differentiation	8/180	314/18986	0.0254777	2.68733	2.9496	0.0103415	0.153602	0.133831	OBSCN/NEB/PDGFRB/SYNE1/PRKG1/CDON/EFNB2/ADAMTS5	8	BP	downreg	Mast cell
GO:0010634	positive regulation of epithelial cell migration	3/180	48/18986	0.0625	6.59236	3.79527	0.0106033	0.155659	0.135624	TGFB2/FGF10/ITGA2	3	BP	downreg	Mast cell
GO:0061383	trabecula morphogenesis	3/180	48/18986	0.0625	6.59236	3.79527	0.0106033	0.155659	0.135624	TGFB2/PPARGC1B/HEY1	3	BP	downreg	Mast cell
GO:0021543	pallium development	6/180	195/18986	0.0307692	3.24547	3.08349	0.0108352	0.157066	0.136849	POU3F3/OGDH/LAMB1/DAB2IP/CDON/FLNA	6	BP	downreg	Mast cell
GO:0002076	osteoblast development	2/180	17/18986	0.117647	12.4092	4.60414	0.011071	0.157066	0.136849	TNN/PTH1R	2	BP	downreg	Mast cell
GO:0048557	embryonic digestive tract morphogenesis	2/180	17/18986	0.117647	12.4092	4.60414	0.011071	0.157066	0.136849	FGF10/FGFR2	2	BP	downreg	Mast cell
GO:1900747	negative regulation of vascular endothelial growth factor signaling pathway	2/180	17/18986	0.117647	12.4092	4.60414	0.011071	0.157066	0.136849	EMILIN1/DAB2IP	2	BP	downreg	Mast cell
GO:0021795	cerebral cortex cell migration	3/180	49/18986	0.0612245	6.45782	3.74244	0.0112174	0.157066	0.136849	POU3F3/LAMB1/DAB2IP	3	BP	downreg	Mast cell
GO:0030850	prostate gland development	3/180	49/18986	0.0612245	6.45782	3.74244	0.0112174	0.157066	0.136849	FGF10/FGFR2/RARG	3	BP	downreg	Mast cell
GO:0035272	exocrine system development	3/180	49/18986	0.0612245	6.45782	3.74244	0.0112174	0.157066	0.136849	TGFB2/FGF10/FGFR2	3	BP	downreg	Mast cell
GO:0046578	regulation of Ras protein signal transduction	3/180	49/18986	0.0612245	6.45782	3.74244	0.0112174	0.157066	0.136849	TGFB2/FGF10/DAB2IP	3	BP	downreg	Mast cell
GO:0070371	ERK1 and ERK2 cascade	8/180	319/18986	0.0250784	2.64521	2.89917	0.0112972	0.157066	0.136849	EMILIN1/NEK10/FGF10/PDGFRB/GCNT2/WNK2/DAB2IP/FGFR2	8	BP	downreg	Mast cell
GO:0001656	metanephros development	4/180	92/18986	0.0434783	4.58599	3.37314	0.0114331	0.157066	0.136849	POU3F3/FGF10/PDGFRB/YAP1	4	BP	downreg	Mast cell
GO:0055017	cardiac muscle tissue growth	4/180	92/18986	0.0434783	4.58599	3.37314	0.0114331	0.157066	0.136849	TGFB2/PRKG1/FGFR2/YAP1	4	BP	downreg	Mast cell
GO:0035148	tube formation	5/180	142/18986	0.0352113	3.71401	3.17586	0.0114456	0.157066	0.136849	TGFB2/FGF10/DAB2IP/FGFR2/RARG	5	BP	downreg	Mast cell
GO:0045747	positive regulation of Notch signaling pathway	3/180	50/18986	0.06	6.32867	3.69107	0.0118517	0.161194	0.140447	TGFB2/FGF10/YAP1	3	BP	downreg	Mast cell
GO:0048568	embryonic organ development	10/180	458/18986	0.0218341	2.30301	2.76159	0.0122124	0.161194	0.140447	TGFB2/FGF10/HEY1/COL27A1/STOX1/CDH23/FGFR2/YAP1/RARG/PBX4	10	BP	downreg	Mast cell
GO:0021954	central nervous system neuron development	4/180	94/18986	0.0425532	4.48842	3.31701	0.0122982	0.161194	0.140447	OGDH/FGFR2/CDH11/B4GALT6	4	BP	downreg	Mast cell
GO:1904705	regulation of vascular associated smooth muscle cell proliferation	4/180	94/18986	0.0425532	4.48842	3.31701	0.0122982	0.161194	0.140447	DDR2/PRKG1/FGFR2/TAFA5	4	BP	downreg	Mast cell
GO:0010517	regulation of phospholipase activity	2/180	18/18986	0.111111	11.7198	4.45147	0.0123779	0.161194	0.140447	PLA2R1/FGFR2	2	BP	downreg	Mast cell
GO:0010715	regulation of extracellular matrix disassembly	2/180	18/18986	0.111111	11.7198	4.45147	0.0123779	0.161194	0.140447	DDR2/FAP	2	BP	downreg	Mast cell
GO:0042753	positive regulation of circadian rhythm	2/180	18/18986	0.111111	11.7198	4.45147	0.0123779	0.161194	0.140447	PRKG1/RORA	2	BP	downreg	Mast cell
GO:1905209	positive regulation of cardiocyte differentiation	2/180	18/18986	0.111111	11.7198	4.45147	0.0123779	0.161194	0.140447	TGFB2/EFNB2	2	BP	downreg	Mast cell
GO:2001224	positive regulation of neuron migration	2/180	18/18986	0.111111	11.7198	4.45147	0.0123779	0.161194	0.140447	DAB2IP/FLNA	2	BP	downreg	Mast cell
GO:0007409	axonogenesis	10/180	459/18986	0.0217865	2.29799	2.75403	0.0123848	0.161194	0.140447	TNN/UNC5C/EMB/MATN2/PRKG1/FGFR2/EFNB2/FLRT2/CDH11/B4GALT6	10	BP	downreg	Mast cell
GO:0001649	osteoblast differentiation	7/180	262/18986	0.0267176	2.81811	2.89911	0.0126505	0.163808	0.142723	DDR2/TNN/PTH1R/RSPO2/CCN4/FGFR2/YAP1	7	BP	downreg	Mast cell
GO:0048839	inner ear development	6/180	202/18986	0.029703	3.133	2.98172	0.0127239	0.163917	0.142819	TGFB2/CYTL1/FGF10/STOX1/CDH23/FGFR2	6	BP	downreg	Mast cell
GO:0032964	collagen biosynthetic process	3/180	52/18986	0.0576923	6.08526	3.59242	0.0131811	0.166703	0.145247	DDR2/EMILIN1/ITGA2	3	BP	downreg	Mast cell
GO:0035987	endodermal cell differentiation	3/180	52/18986	0.0576923	6.08526	3.59242	0.0131811	0.166703	0.145247	COL8A1/LAMB1/COL4A2	3	BP	downreg	Mast cell
GO:0001942	hair follicle development	4/180	96/18986	0.0416667	4.39491	3.26243	0.0132042	0.166703	0.145247	TGFB2/FGF10/FGFR2/TNFRSF19	4	BP	downreg	Mast cell
GO:1990874	vascular associated smooth muscle cell proliferation	4/180	96/18986	0.0416667	4.39491	3.26243	0.0132042	0.166703	0.145247	DDR2/PRKG1/FGFR2/TAFA5	4	BP	downreg	Mast cell
GO:0007224	smoothened signaling pathway	5/180	148/18986	0.0337838	3.56344	3.06288	0.0134974	0.168451	0.146769	FGF10/ENPP1/FGFR2/CDON/RORA	5	BP	downreg	Mast cell
GO:0003417	growth plate cartilage development	2/180	19/18986	0.105263	11.1029	4.3104	0.0137487	0.168451	0.146769	COL27A1/RARG	2	BP	downreg	Mast cell
GO:0030903	notochord development	2/180	19/18986	0.105263	11.1029	4.3104	0.0137487	0.168451	0.146769	COL27A1/YAP1	2	BP	downreg	Mast cell
GO:0055003	cardiac myofibril assembly	2/180	19/18986	0.105263	11.1029	4.3104	0.0137487	0.168451	0.146769	NEB/PDGFRB	2	BP	downreg	Mast cell
GO:0060438	trachea development	2/180	19/18986	0.105263	11.1029	4.3104	0.0137487	0.168451	0.146769	RSPO2/RARG	2	BP	downreg	Mast cell
GO:1902548	negative regulation of cellular response to vascular endothelial growth factor stimulus	2/180	19/18986	0.105263	11.1029	4.3104	0.0137487	0.168451	0.146769	EMILIN1/DAB2IP	2	BP	downreg	Mast cell
GO:0060562	epithelial tube morphogenesis	8/180	331/18986	0.0241692	2.54931	2.78195	0.0138557	0.168451	0.146769	TGFB2/FGF10/RSPO2/STOX1/FGFR2/YAP1/RARG/EFNB2	8	BP	downreg	Mast cell
GO:0032330	regulation of chondrocyte differentiation	3/180	53/18986	0.0566038	5.97044	3.545	0.0138764	0.168451	0.146769	MBOAT2/CCN4/RARG	3	BP	downreg	Mast cell
GO:0016051	carbohydrate biosynthetic process	6/180	207/18986	0.0289855	3.05733	2.91169	0.0142071	0.17164	0.149548	PTH1R/ST3GAL6/ENPP1/CSGALNACT1/PRKG1/ALDOC	6	BP	downreg	Mast cell
GO:0010543	regulation of platelet activation	3/180	54/18986	0.0555556	5.85988	3.49878	0.0145922	0.172753	0.150518	EMILIN1/PRKG1/FLNA	3	BP	downreg	Mast cell
GO:1904752	regulation of vascular associated smooth muscle cell migration	3/180	54/18986	0.0555556	5.85988	3.49878	0.0145922	0.172753	0.150518	DDR2/PRKG1/TAFA5	3	BP	downreg	Mast cell
GO:0120161	regulation of cold-induced thermogenesis	5/180	151/18986	0.0331126	3.49264	3.00856	0.0146107	0.172753	0.150518	ESRRG/ACADL/PPARGC1B/SCD/ADAMTS5	5	BP	downreg	Mast cell
GO:0022404	molting cycle process	4/180	99/18986	0.040404	4.26173	3.1833	0.0146413	0.172753	0.150518	TGFB2/FGF10/FGFR2/TNFRSF19	4	BP	downreg	Mast cell
GO:0022405	hair cycle process	4/180	99/18986	0.040404	4.26173	3.1833	0.0146413	0.172753	0.150518	TGFB2/FGF10/FGFR2/TNFRSF19	4	BP	downreg	Mast cell
GO:0022409	positive regulation of cell-cell adhesion	8/180	336/18986	0.0238095	2.51138	2.73461	0.015038	0.176609	0.153877	PTPRU/EMILIN1/GCNT2/HLA-DRB5/CARD11/ETS1/EFNB2/IRAK1	8	BP	downreg	Mast cell
GO:0060419	heart growth	4/180	100/18986	0.04	4.21911	3.15762	0.0151413	0.177	0.154217	TGFB2/PRKG1/FGFR2/YAP1	4	BP	downreg	Mast cell
GO:0106106	cold-induced thermogenesis	5/180	153/18986	0.0326797	3.44699	2.97311	0.0153862	0.179033	0.155989	ESRRG/ACADL/PPARGC1B/SCD/ADAMTS5	5	BP	downreg	Mast cell
GO:0034109	homotypic cell-cell adhesion	4/180	101/18986	0.039604	4.17734	3.13227	0.0156521	0.180464	0.157236	PTPRU/EMILIN1/PRKG1/FLNA	4	BP	downreg	Mast cell
GO:0120162	positive regulation of cold-induced thermogenesis	4/180	101/18986	0.039604	4.17734	3.13227	0.0156521	0.180464	0.157236	ESRRG/ACADL/PPARGC1B/SCD	4	BP	downreg	Mast cell
GO:0048762	mesenchymal cell differentiation	7/180	274/18986	0.0255474	2.69469	2.76438	0.0158228	0.181603	0.158228	TGFB2/FGF10/GCNT2/HEY1/DAB2IP/FGFR2/FLNA	7	BP	downreg	Mast cell
GO:1900087	positive regulation of G1/S transition of mitotic cell cycle	3/180	56/18986	0.0535714	5.6506	3.40973	0.0160856	0.182956	0.159407	DDR2/FGF10/STOX1	3	BP	downreg	Mast cell
GO:1904738	vascular associated smooth muscle cell migration	3/180	56/18986	0.0535714	5.6506	3.40973	0.0160856	0.182956	0.159407	DDR2/PRKG1/TAFA5	3	BP	downreg	Mast cell
GO:0045667	regulation of osteoblast differentiation	5/180	156/18986	0.0320513	3.3807	2.92102	0.0166003	0.186322	0.16234	DDR2/TNN/CCN4/FGFR2/YAP1	5	BP	downreg	Mast cell
GO:0071456	cellular response to hypoxia	5/180	156/18986	0.0320513	3.3807	2.92102	0.0166003	0.186322	0.16234	DDAH1/DDR2/FGFR2/RORA/IRAK1	5	BP	downreg	Mast cell
GO:0009190	cyclic nucleotide biosynthetic process	2/180	21/18986	0.0952381	10.0455	4.05751	0.0166767	0.186322	0.16234	GUCY1B1/GUCY1A2	2	BP	downreg	Mast cell
GO:2001044	regulation of integrin-mediated signaling pathway	2/180	21/18986	0.0952381	10.0455	4.05751	0.0166767	0.186322	0.16234	LAMB1/FLNA	2	BP	downreg	Mast cell
GO:0001654	eye development	9/180	411/18986	0.0218978	2.30973	2.62623	0.0167583	0.186408	0.162415	TGFB2/COL8A1/FGF10/PDGFRB/CDON/RARG/FLT1/NKD1/PBX4	9	BP	downreg	Mast cell
GO:0050673	epithelial cell proliferation	10/180	482/18986	0.0207469	2.18834	2.58537	0.0168809	0.186949	0.162886	TGFB2/FAP/COL8A1/FGF10/LAMB1/DAB2IP/FGFR2/YAP1/FLT1/EFNB2	10	BP	downreg	Mast cell
GO:0098742	cell-cell adhesion via plasma-membrane adhesion molecules	7/180	280/18986	0.025	2.63694	2.6997	0.0176048	0.192612	0.16782	TGFB2/CLDN11/EMB/CDH23/PCDH9/CDH11/PCDH19	7	BP	downreg	Mast cell
GO:0072132	mesenchyme morphogenesis	3/180	58/18986	0.0517241	5.45575	3.32488	0.0176618	0.192612	0.16782	TGFB2/HEY1/ADAMTS5	3	BP	downreg	Mast cell
GO:0150063	visual system development	9/180	415/18986	0.0216867	2.28747	2.5944	0.0177289	0.192612	0.16782	TGFB2/COL8A1/FGF10/PDGFRB/CDON/RARG/FLT1/NKD1/PBX4	9	BP	downreg	Mast cell
GO:0008593	regulation of Notch signaling pathway	4/180	105/18986	0.0380952	4.0182	3.03406	0.0178031	0.192612	0.16782	TGFB2/FGF10/HEY1/YAP1	4	BP	downreg	Mast cell
GO:0045216	cell-cell junction organization	6/180	218/18986	0.0275229	2.90306	2.76481	0.0178865	0.192612	0.16782	TGFB2/CLDN11/MPP7/EFNB2/CDH11/FLNA	6	BP	downreg	Mast cell
GO:0009150	purine ribonucleotide metabolic process	8/180	348/18986	0.0229885	2.42478	2.6244	0.0181727	0.192612	0.16782	GUCY1B1/ENPP1/CARD11/OGDH/GUCY1A2/PFKM/RORA/ALDOC	8	BP	downreg	Mast cell
GO:0060445	branching involved in salivary gland morphogenesis	2/180	22/18986	0.0909091	9.58889	3.94345	0.0182314	0.192612	0.16782	FGF10/FGFR2	2	BP	downreg	Mast cell
GO:0072202	cell differentiation involved in metanephros development	2/180	22/18986	0.0909091	9.58889	3.94345	0.0182314	0.192612	0.16782	POU3F3/YAP1	2	BP	downreg	Mast cell
GO:0072234	metanephric nephron tubule development	2/180	22/18986	0.0909091	9.58889	3.94345	0.0182314	0.192612	0.16782	POU3F3/YAP1	2	BP	downreg	Mast cell
GO:1902307	positive regulation of sodium ion transmembrane transport	2/180	22/18986	0.0909091	9.58889	3.94345	0.0182314	0.192612	0.16782	WNK2/FXYD3	2	BP	downreg	Mast cell
GO:1903054	negative regulation of extracellular matrix organization	2/180	22/18986	0.0909091	9.58889	3.94345	0.0182314	0.192612	0.16782	EMILIN1/FAP	2	BP	downreg	Mast cell
GO:0038066	p38MAPK cascade	3/180	60/18986	0.05	5.27389	3.24387	0.0193212	0.201366	0.175448	SASH1/DAB2IP/MAP2K3	3	BP	downreg	Mast cell
GO:0055008	cardiac muscle tissue morphogenesis	3/180	60/18986	0.05	5.27389	3.24387	0.0193212	0.201366	0.175448	TGFB2/MYL3/FGFR2	3	BP	downreg	Mast cell
GO:0060350	endochondral bone morphogenesis	3/180	60/18986	0.05	5.27389	3.24387	0.0193212	0.201366	0.175448	CSGALNACT1/COL27A1/RARG	3	BP	downreg	Mast cell
GO:0048880	sensory system development	9/180	422/18986	0.021327	2.24953	2.53956	0.0195254	0.201366	0.175448	TGFB2/COL8A1/FGF10/PDGFRB/CDON/RARG/FLT1/NKD1/PBX4	9	BP	downreg	Mast cell
GO:0042472	inner ear morphogenesis	4/180	108/18986	0.037037	3.90658	2.96354	0.0195314	0.201366	0.175448	FGF10/STOX1/CDH23/FGFR2	4	BP	downreg	Mast cell
GO:0036294	cellular response to decreased oxygen levels	5/180	163/18986	0.0306748	3.23551	2.80427	0.019677	0.201366	0.175448	DDAH1/DDR2/FGFR2/RORA/IRAK1	5	BP	downreg	Mast cell
GO:0010800	positive regulation of peptidyl-threonine phosphorylation	2/180	23/18986	0.0869565	9.17198	3.83646	0.0198448	0.201366	0.175448	STOX1/CEMIP	2	BP	downreg	Mast cell
GO:0060571	morphogenesis of an epithelial fold	2/180	23/18986	0.0869565	9.17198	3.83646	0.0198448	0.201366	0.175448	FGF10/FGFR2	2	BP	downreg	Mast cell
GO:0150105	protein localization to cell-cell junction	2/180	23/18986	0.0869565	9.17198	3.83646	0.0198448	0.201366	0.175448	MPP7/FLNA	2	BP	downreg	Mast cell
GO:0043542	endothelial cell migration	7/180	287/18986	0.0243902	2.57263	2.62634	0.0198575	0.201366	0.175448	PLEKHG5/FAP/SASH1/DAB2IP/ETS1/EFNB2/MAP2K3	7	BP	downreg	Mast cell
GO:0001706	endoderm formation	3/180	61/18986	0.0491803	5.18743	3.2047	0.0201821	0.202713	0.176621	COL8A1/LAMB1/COL4A2	3	BP	downreg	Mast cell
GO:0060038	cardiac muscle cell proliferation	3/180	61/18986	0.0491803	5.18743	3.2047	0.0201821	0.202713	0.176621	TGFB2/FGFR2/YAP1	3	BP	downreg	Mast cell
GO:1903829	positive regulation of protein localization	10/180	497/18986	0.0201207	2.12229	2.48039	0.0204037	0.202713	0.176621	TGFB2/DPP10/FRMD4A/YAP1/PFKM/SNX33/ABHD17C/CEMIP/CEP131/FLNA	10	BP	downreg	Mast cell
GO:0060541	respiratory system development	6/180	225/18986	0.0266667	2.81274	2.67604	0.0205415	0.202713	0.176621	HSD11B1/FGF10/RSPO2/FGFR2/YAP1/RARG	6	BP	downreg	Mast cell
GO:0000768	syncytium formation by plasma membrane fusion	3/180	62/18986	0.0483871	5.10376	3.16639	0.0210639	0.202713	0.176621	SH3PXD2A/CDON/ADAMTS5	3	BP	downreg	Mast cell
GO:0140253	cell-cell fusion	3/180	62/18986	0.0483871	5.10376	3.16639	0.0210639	0.202713	0.176621	SH3PXD2A/CDON/ADAMTS5	3	BP	downreg	Mast cell
GO:0002009	morphogenesis of an epithelium	10/180	500/18986	0.02	2.10956	2.45983	0.0211684	0.202713	0.176621	TGFB2/FGF10/RSPO2/STOX1/FGFR2/YAP1/RARG/EFNB2/NKD1/FLNA	10	BP	downreg	Mast cell
GO:0003279	cardiac septum development	4/180	111/18986	0.036036	3.801	2.89551	0.0213599	0.202713	0.176621	DHRS3/TGFB2/HEY1/FGFR2	4	BP	downreg	Mast cell
GO:0007229	integrin-mediated signaling pathway	4/180	111/18986	0.036036	3.801	2.89551	0.0213599	0.202713	0.176621	ITGA2/LAMB1/PRAM1/FLNA	4	BP	downreg	Mast cell
GO:0030203	glycosaminoglycan metabolic process	4/180	111/18986	0.036036	3.801	2.89551	0.0213599	0.202713	0.176621	ST3GAL6/GCNT2/CSGALNACT1/CEMIP	4	BP	downreg	Mast cell
GO:0032963	collagen metabolic process	4/180	111/18986	0.036036	3.801	2.89551	0.0213599	0.202713	0.176621	DDR2/EMILIN1/FAP/ITGA2	4	BP	downreg	Mast cell
GO:0010839	negative regulation of keratinocyte proliferation	2/180	24/18986	0.0833333	8.78981	3.7358	0.0215157	0.202713	0.176621	FGFR2/EFNB2	2	BP	downreg	Mast cell
GO:0032891	negative regulation of organic acid transport	2/180	24/18986	0.0833333	8.78981	3.7358	0.0215157	0.202713	0.176621	PLA2R1/PRKG1	2	BP	downreg	Mast cell
GO:0045844	positive regulation of striated muscle tissue development	2/180	24/18986	0.0833333	8.78981	3.7358	0.0215157	0.202713	0.176621	CDON/ERBB3	2	BP	downreg	Mast cell
GO:0046580	negative regulation of Ras protein signal transduction	2/180	24/18986	0.0833333	8.78981	3.7358	0.0215157	0.202713	0.176621	TGFB2/DAB2IP	2	BP	downreg	Mast cell
GO:0048636	positive regulation of muscle organ development	2/180	24/18986	0.0833333	8.78981	3.7358	0.0215157	0.202713	0.176621	CDON/ERBB3	2	BP	downreg	Mast cell
GO:0050650	chondroitin sulfate proteoglycan biosynthetic process	2/180	24/18986	0.0833333	8.78981	3.7358	0.0215157	0.202713	0.176621	CYTL1/CSGALNACT1	2	BP	downreg	Mast cell
GO:0072170	metanephric tubule development	2/180	24/18986	0.0833333	8.78981	3.7358	0.0215157	0.202713	0.176621	POU3F3/YAP1	2	BP	downreg	Mast cell
GO:1901863	positive regulation of muscle tissue development	2/180	24/18986	0.0833333	8.78981	3.7358	0.0215157	0.202713	0.176621	CDON/ERBB3	2	BP	downreg	Mast cell
GO:0003229	ventricular cardiac muscle tissue development	3/180	63/18986	0.047619	5.02275	3.1289	0.0219665	0.205666	0.179194	TGFB2/MYL3/FGFR2	3	BP	downreg	Mast cell
GO:0030316	osteoclast differentiation	4/180	112/18986	0.0357143	3.76706	2.87336	0.021992	0.205666	0.179194	TMEM178A/PPARGC1B/CCN4/SH3PXD2A	4	BP	downreg	Mast cell
GO:0007156	homophilic cell adhesion via plasma membrane adhesion molecules	5/180	168/18986	0.0297619	3.13922	2.72469	0.0220897	0.205817	0.179326	EMB/CDH23/PCDH9/CDH11/PCDH19	5	BP	downreg	Mast cell
GO:0043583	ear development	6/180	229/18986	0.0262009	2.76361	2.62683	0.022173	0.205834	0.17934	TGFB2/CYTL1/FGF10/STOX1/CDH23/FGFR2	6	BP	downreg	Mast cell
GO:0005976	polysaccharide metabolic process	4/180	113/18986	0.0353982	3.73373	2.85146	0.0226354	0.209357	0.18241	ENPP1/CSGALNACT1/ATG2A/PFKM	4	BP	downreg	Mast cell
GO:0031346	positive regulation of cell projection organization	8/180	363/18986	0.0220386	2.32458	2.49287	0.0227193	0.209365	0.182417	DDR2/TNN/NCKIPSD/SERPINI1/ITGA2/TENM2/DAB2IP/FLNA	8	BP	downreg	Mast cell
GO:0051058	negative regulation of small GTPase mediated signal transduction	3/180	64/18986	0.046875	4.94427	3.09219	0.02289	0.209601	0.182623	ARHGAP29/TGFB2/DAB2IP	3	BP	downreg	Mast cell
GO:1990845	adaptive thermogenesis	5/180	170/18986	0.0294118	3.10229	2.69368	0.0231063	0.209601	0.182623	ESRRG/ACADL/PPARGC1B/SCD/ADAMTS5	5	BP	downreg	Mast cell
GO:0021884	forebrain neuron development	2/180	25/18986	0.08	8.43822	3.64084	0.0232429	0.209601	0.182623	OGDH/FGFR2	2	BP	downreg	Mast cell
GO:0032331	negative regulation of chondrocyte differentiation	2/180	25/18986	0.08	8.43822	3.64084	0.0232429	0.209601	0.182623	CCN4/RARG	2	BP	downreg	Mast cell
GO:0048169	regulation of long-term neuronal synaptic plasticity	2/180	25/18986	0.08	8.43822	3.64084	0.0232429	0.209601	0.182623	GRIK2/SYP	2	BP	downreg	Mast cell
GO:0072243	metanephric nephron epithelium development	2/180	25/18986	0.08	8.43822	3.64084	0.0232429	0.209601	0.182623	POU3F3/YAP1	2	BP	downreg	Mast cell
GO:0048705	skeletal system morphogenesis	6/180	232/18986	0.0258621	2.72787	2.59061	0.0234526	0.210628	0.183518	DHRS3/PPARGC1B/CSGALNACT1/COL27A1/FGFR2/RARG	6	BP	downreg	Mast cell
GO:0061351	neural precursor cell proliferation	5/180	171/18986	0.0292398	3.08415	2.67835	0.0236257	0.210628	0.183518	POU3F3/FGFR2/CDON/RORA/FLNA	5	BP	downreg	Mast cell
GO:0022617	extracellular matrix disassembly	3/180	65/18986	0.0461538	4.86821	3.05624	0.0238344	0.210628	0.183518	DDR2/FAP/ADAMTS5	3	BP	downreg	Mast cell
GO:0051965	positive regulation of synapse assembly	3/180	65/18986	0.0461538	4.86821	3.05624	0.0238344	0.210628	0.183518	THBS2/FLRT2/CBLN2	3	BP	downreg	Mast cell
GO:0003205	cardiac chamber development	5/180	172/18986	0.0290698	3.06621	2.66313	0.0241527	0.210628	0.183518	DHRS3/TGFB2/MYL3/HEY1/FGFR2	5	BP	downreg	Mast cell
GO:0009259	ribonucleotide metabolic process	8/180	368/18986	0.0217391	2.293	2.45046	0.0243989	0.210628	0.183518	GUCY1B1/ENPP1/CARD11/OGDH/GUCY1A2/PFKM/RORA/ALDOC	8	BP	downreg	Mast cell
GO:0051056	regulation of small GTPase mediated signal transduction	7/180	300/18986	0.0233333	2.46115	2.49569	0.0245628	0.210628	0.183518	PLEKHG5/ARHGAP29/TGFB2/OBSCN/FGF10/DAB2IP/CDON	7	BP	downreg	Mast cell
GO:0009135	purine nucleoside diphosphate metabolic process	4/180	116/18986	0.0344828	3.63716	2.78724	0.024634	0.210628	0.183518	CARD11/OGDH/PFKM/ALDOC	4	BP	downreg	Mast cell
GO:0009179	purine ribonucleoside diphosphate metabolic process	4/180	116/18986	0.0344828	3.63716	2.78724	0.024634	0.210628	0.183518	CARD11/OGDH/PFKM/ALDOC	4	BP	downreg	Mast cell
GO:0060840	artery development	4/180	116/18986	0.0344828	3.63716	2.78724	0.024634	0.210628	0.183518	TGFB2/PDGFRB/HEY1/EFNB2	4	BP	downreg	Mast cell
GO:0006163	purine nucleotide metabolic process	9/180	440/18986	0.0204545	2.1575	2.40334	0.0247469	0.210628	0.183518	FMO2/GUCY1B1/ENPP1/CARD11/OGDH/GUCY1A2/PFKM/RORA/ALDOC	9	BP	downreg	Mast cell
GO:0001655	urogenital system development	3/180	66/18986	0.0454545	4.79444	3.02102	0.0247997	0.210628	0.183518	FGF10/FGFR2/RARG	3	BP	downreg	Mast cell
GO:0006949	syncytium formation	3/180	66/18986	0.0454545	4.79444	3.02102	0.0247997	0.210628	0.183518	SH3PXD2A/CDON/ADAMTS5	3	BP	downreg	Mast cell
GO:0090303	positive regulation of wound healing	3/180	66/18986	0.0454545	4.79444	3.02102	0.0247997	0.210628	0.183518	DDR2/EMILIN1/CCN4	3	BP	downreg	Mast cell
GO:0002053	positive regulation of mesenchymal cell proliferation	2/180	26/18986	0.0769231	8.11368	3.55103	0.0250251	0.210628	0.183518	SYNE1/FGFR2	2	BP	downreg	Mast cell
GO:0003148	outflow tract septum morphogenesis	2/180	26/18986	0.0769231	8.11368	3.55103	0.0250251	0.210628	0.183518	TGFB2/FGFR2	2	BP	downreg	Mast cell
GO:0005980	glycogen catabolic process	2/180	26/18986	0.0769231	8.11368	3.55103	0.0250251	0.210628	0.183518	ATG2A/PFKM	2	BP	downreg	Mast cell
GO:0050927	positive regulation of positive chemotaxis	2/180	26/18986	0.0769231	8.11368	3.55103	0.0250251	0.210628	0.183518	FGF10/ITGA2	2	BP	downreg	Mast cell
GO:0099149	regulation of postsynaptic neurotransmitter receptor internalization	2/180	26/18986	0.0769231	8.11368	3.55103	0.0250251	0.210628	0.183518	SYNE1/EFNB2	2	BP	downreg	Mast cell
GO:1904996	positive regulation of leukocyte adhesion to vascular endothelial cell	2/180	26/18986	0.0769231	8.11368	3.55103	0.0250251	0.210628	0.183518	ETS1/IRAK1	2	BP	downreg	Mast cell
GO:0170039	proteinogenic amino acid metabolic process	5/180	174/18986	0.0287356	3.03097	2.63302	0.0252292	0.210985	0.183828	DDAH1/CDO1/HMGCLL1/SEPHS2/ILVBL	5	BP	downreg	Mast cell
GO:0097191	extrinsic apoptotic signaling pathway	6/180	236/18986	0.0254237	2.68164	2.5432	0.0252346	0.210985	0.183828	DEDD/TGFB2/FGF10/DAB2IP/YAP1/ERBB3	6	BP	downreg	Mast cell
GO:0050680	negative regulation of epithelial cell proliferation	5/180	175/18986	0.0285714	3.01365	2.61813	0.0257788	0.214824	0.187173	TGFB2/DAB2IP/FGFR2/FLT1/EFNB2	5	BP	downreg	Mast cell
GO:0006874	intracellular calcium ion homeostasis	7/180	304/18986	0.0230263	2.42876	2.45685	0.0261527	0.217013	0.189081	TMEM178A/PTH1R/PLCH1/GRIK2/CDH23/CEMIP/FLNA	7	BP	downreg	Mast cell
GO:0003181	atrioventricular valve morphogenesis	2/180	27/18986	0.0740741	7.81317	3.4659	0.0268613	0.217013	0.189081	TGFB2/HEY1	2	BP	downreg	Mast cell
GO:0009251	glucan catabolic process	2/180	27/18986	0.0740741	7.81317	3.4659	0.0268613	0.217013	0.189081	ATG2A/PFKM	2	BP	downreg	Mast cell
GO:0021846	cell proliferation in forebrain	2/180	27/18986	0.0740741	7.81317	3.4659	0.0268613	0.217013	0.189081	POU3F3/FGFR2	2	BP	downreg	Mast cell
GO:0032958	inositol phosphate biosynthetic process	2/180	27/18986	0.0740741	7.81317	3.4659	0.0268613	0.217013	0.189081	PTH1R/PRKG1	2	BP	downreg	Mast cell
GO:0032967	positive regulation of collagen biosynthetic process	2/180	27/18986	0.0740741	7.81317	3.4659	0.0268613	0.217013	0.189081	DDR2/ITGA2	2	BP	downreg	Mast cell
GO:0035235	ionotropic glutamate receptor signaling pathway	2/180	27/18986	0.0740741	7.81317	3.4659	0.0268613	0.217013	0.189081	GRIK2/GRIA4	2	BP	downreg	Mast cell
GO:0050926	regulation of positive chemotaxis	2/180	27/18986	0.0740741	7.81317	3.4659	0.0268613	0.217013	0.189081	FGF10/ITGA2	2	BP	downreg	Mast cell
GO:0060343	trabecula formation	2/180	27/18986	0.0740741	7.81317	3.4659	0.0268613	0.217013	0.189081	PPARGC1B/HEY1	2	BP	downreg	Mast cell
GO:0007254	JNK cascade	5/180	177/18986	0.0282486	2.9796	2.58866	0.026901	0.217013	0.189081	GRIK2/MDFIC/DAB2IP/TNFRSF19/IRAK1	5	BP	downreg	Mast cell
GO:0019693	ribose phosphate metabolic process	8/180	376/18986	0.0212766	2.24421	2.384	0.027265	0.218835	0.190669	GUCY1B1/ENPP1/CARD11/OGDH/GUCY1A2/PFKM/RORA/ALDOC	8	BP	downreg	Mast cell
GO:0042303	molting cycle	4/180	120/18986	0.0333333	3.51593	2.70484	0.0274601	0.218835	0.190669	TGFB2/FGF10/FGFR2/TNFRSF19	4	BP	downreg	Mast cell
GO:0042633	hair cycle	4/180	120/18986	0.0333333	3.51593	2.70484	0.0274601	0.218835	0.190669	TGFB2/FGF10/FGFR2/TNFRSF19	4	BP	downreg	Mast cell
GO:0071453	cellular response to oxygen levels	5/180	178/18986	0.0280899	2.96286	2.57407	0.0274736	0.218835	0.190669	DDAH1/DDR2/FGFR2/RORA/IRAK1	5	BP	downreg	Mast cell
GO:0030193	regulation of blood coagulation	3/180	69/18986	0.0434783	4.58599	2.91945	0.0278205	0.220209	0.191866	EMILIN1/FAP/PRKG1	3	BP	downreg	Mast cell
GO:0071300	cellular response to retinoic acid	3/180	69/18986	0.0434783	4.58599	2.91945	0.0278205	0.220209	0.191866	FGFR2/YAP1/RARG	3	BP	downreg	Mast cell
GO:0009081	branched-chain amino acid metabolic process	2/180	28/18986	0.0714286	7.53413	3.38504	0.0287501	0.222	0.193426	HMGCLL1/ILVBL	2	BP	downreg	Mast cell
GO:0010714	positive regulation of collagen metabolic process	2/180	28/18986	0.0714286	7.53413	3.38504	0.0287501	0.222	0.193426	DDR2/ITGA2	2	BP	downreg	Mast cell
GO:0021801	cerebral cortex radial glia-guided migration	2/180	28/18986	0.0714286	7.53413	3.38504	0.0287501	0.222	0.193426	LAMB1/DAB2IP	2	BP	downreg	Mast cell
GO:0022030	telencephalon glial cell migration	2/180	28/18986	0.0714286	7.53413	3.38504	0.0287501	0.222	0.193426	LAMB1/DAB2IP	2	BP	downreg	Mast cell
GO:0072207	metanephric epithelium development	2/180	28/18986	0.0714286	7.53413	3.38504	0.0287501	0.222	0.193426	POU3F3/YAP1	2	BP	downreg	Mast cell
GO:0099558	maintenance of synapse structure	2/180	28/18986	0.0714286	7.53413	3.38504	0.0287501	0.222	0.193426	CSMD2/CBLN2	2	BP	downreg	Mast cell
GO:1904753	negative regulation of vascular associated smooth muscle cell migration	2/180	28/18986	0.0714286	7.53413	3.38504	0.0287501	0.222	0.193426	PRKG1/TAFA5	2	BP	downreg	Mast cell
GO:2000647	negative regulation of stem cell proliferation	2/180	28/18986	0.0714286	7.53413	3.38504	0.0287501	0.222	0.193426	FGF10/RARG	2	BP	downreg	Mast cell
GO:0006022	aminoglycan metabolic process	4/180	122/18986	0.0327869	3.45829	2.66495	0.0289428	0.222806	0.194128	ST3GAL6/GCNT2/CSGALNACT1/CEMIP	4	BP	downreg	Mast cell
GO:0170033	L-amino acid metabolic process	5/180	181/18986	0.0276243	2.91375	2.53094	0.0292378	0.224393	0.195511	DDAH1/CDO1/HMGCLL1/SEPHS2/ILVBL	5	BP	downreg	Mast cell
GO:0030326	embryonic limb morphogenesis	4/180	123/18986	0.0325203	3.43017	2.64532	0.0297016	0.22633	0.197199	TGFB2/PITX1/RSPO2/RARG	4	BP	downreg	Mast cell
GO:0035113	embryonic appendage morphogenesis	4/180	123/18986	0.0325203	3.43017	2.64532	0.0297016	0.22633	0.197199	TGFB2/PITX1/RSPO2/RARG	4	BP	downreg	Mast cell
GO:0170040	proteinogenic amino acid catabolic process	3/180	71/18986	0.0422535	4.45681	2.85492	0.0299383	0.22633	0.197199	DDAH1/CDO1/HMGCLL1	3	BP	downreg	Mast cell
GO:1900046	regulation of hemostasis	3/180	71/18986	0.0422535	4.45681	2.85492	0.0299383	0.22633	0.197199	EMILIN1/FAP/PRKG1	3	BP	downreg	Mast cell
GO:1902808	positive regulation of cell cycle G1/S phase transition	3/180	71/18986	0.0422535	4.45681	2.85492	0.0299383	0.22633	0.197199	DDR2/FGF10/STOX1	3	BP	downreg	Mast cell
GO:0000272	polysaccharide catabolic process	2/180	29/18986	0.0689655	7.27433	3.30807	0.0306906	0.229271	0.199761	ATG2A/PFKM	2	BP	downreg	Mast cell
GO:0043507	positive regulation of JUN kinase activity	2/180	29/18986	0.0689655	7.27433	3.30807	0.0306906	0.229271	0.199761	SASH1/DAB2IP	2	BP	downreg	Mast cell
GO:0060479	lung cell differentiation	2/180	29/18986	0.0689655	7.27433	3.30807	0.0306906	0.229271	0.199761	FGF10/YAP1	2	BP	downreg	Mast cell
GO:0060487	lung epithelial cell differentiation	2/180	29/18986	0.0689655	7.27433	3.30807	0.0306906	0.229271	0.199761	FGF10/YAP1	2	BP	downreg	Mast cell
GO:0001659	temperature homeostasis	5/180	185/18986	0.027027	2.85075	2.47478	0.0316992	0.23522	0.204944	ESRRG/ACADL/PPARGC1B/SCD/ADAMTS5	5	BP	downreg	Mast cell
GO:0001666	response to hypoxia	7/180	317/18986	0.022082	2.32916	2.33475	0.0318027	0.23522	0.204944	DDAH1/DDR2/TGFB2/ITGA2/FGFR2/RORA/IRAK1	7	BP	downreg	Mast cell
GO:0009185	ribonucleoside diphosphate metabolic process	4/180	126/18986	0.031746	3.3485	2.58761	0.0320486	0.23522	0.204944	CARD11/OGDH/PFKM/ALDOC	4	BP	downreg	Mast cell
GO:0010811	positive regulation of cell-substrate adhesion	4/180	126/18986	0.031746	3.3485	2.58761	0.0320486	0.23522	0.204944	EMILIN1/COL8A1/ABI3BP/FLNA	4	BP	downreg	Mast cell
GO:0002067	glandular epithelial cell differentiation	3/180	73/18986	0.0410959	4.3347	2.79275	0.0321389	0.23522	0.204944	FGFR2/YAP1/RARG	3	BP	downreg	Mast cell
GO:0060415	muscle tissue morphogenesis	3/180	73/18986	0.0410959	4.3347	2.79275	0.0321389	0.23522	0.204944	TGFB2/MYL3/FGFR2	3	BP	downreg	Mast cell
GO:0061035	regulation of cartilage development	3/180	73/18986	0.0410959	4.3347	2.79275	0.0321389	0.23522	0.204944	MBOAT2/CCN4/RARG	3	BP	downreg	Mast cell
GO:0003171	atrioventricular valve development	2/180	30/18986	0.0666667	7.03185	3.23468	0.0326814	0.236449	0.206015	TGFB2/HEY1	2	BP	downreg	Mast cell
GO:0070168	negative regulation of biomineral tissue development	2/180	30/18986	0.0666667	7.03185	3.23468	0.0326814	0.236449	0.206015	ENPP1/HEY1	2	BP	downreg	Mast cell
GO:0090330	regulation of platelet aggregation	2/180	30/18986	0.0666667	7.03185	3.23468	0.0326814	0.236449	0.206015	EMILIN1/PRKG1	2	BP	downreg	Mast cell
GO:1900746	regulation of vascular endothelial growth factor signaling pathway	2/180	30/18986	0.0666667	7.03185	3.23468	0.0326814	0.236449	0.206015	EMILIN1/DAB2IP	2	BP	downreg	Mast cell
GO:0022612	gland morphogenesis	4/180	127/18986	0.0314961	3.32213	2.56876	0.0328545	0.237022	0.206514	TGFB2/FGF10/FGFR2/RARG	4	BP	downreg	Mast cell
GO:0003281	ventricular septum development	3/180	74/18986	0.0405405	4.27613	2.76249	0.0332701	0.239336	0.208531	TGFB2/HEY1/FGFR2	3	BP	downreg	Mast cell
GO:0003231	cardiac ventricle development	4/180	128/18986	0.03125	3.29618	2.5501	0.0336721	0.240856	0.209855	TGFB2/MYL3/HEY1/FGFR2	4	BP	downreg	Mast cell
GO:0072175	epithelial tube formation	4/180	128/18986	0.03125	3.29618	2.5501	0.0336721	0.240856	0.209855	TGFB2/FGF10/FGFR2/RARG	4	BP	downreg	Mast cell
GO:0001822	kidney development	7/180	322/18986	0.0217391	2.293	2.28937	0.0341782	0.242859	0.2116	TGFB2/POU3F3/FGF10/PDGFRB/FGFR2/YAP1/EFNB2	7	BP	downreg	Mast cell
GO:0009101	glycoprotein biosynthetic process	7/180	322/18986	0.0217391	2.293	2.28937	0.0341782	0.242859	0.2116	ST3GAL6/CYTL1/GCNT2/CSGALNACT1/FUT11/POGLUT3/B4GALT6	7	BP	downreg	Mast cell
GO:0170035	L-amino acid catabolic process	3/180	75/18986	0.04	4.21911	2.73277	0.0344219	0.242859	0.2116	DDAH1/CDO1/HMGCLL1	3	BP	downreg	Mast cell
GO:0042471	ear morphogenesis	4/180	129/18986	0.0310078	3.27063	2.53162	0.0345016	0.242859	0.2116	FGF10/STOX1/CDH23/FGFR2	4	BP	downreg	Mast cell
GO:0033688	regulation of osteoblast proliferation	2/180	31/18986	0.0645161	6.80502	3.16458	0.0347216	0.242859	0.2116	TNN/FGFR2	2	BP	downreg	Mast cell
GO:0050654	chondroitin sulfate proteoglycan metabolic process	2/180	31/18986	0.0645161	6.80502	3.16458	0.0347216	0.242859	0.2116	CYTL1/CSGALNACT1	2	BP	downreg	Mast cell
GO:0099505	regulation of presynaptic membrane potential	2/180	31/18986	0.0645161	6.80502	3.16458	0.0347216	0.242859	0.2116	GRIK2/GRIA4	2	BP	downreg	Mast cell
GO:1903055	positive regulation of extracellular matrix organization	2/180	31/18986	0.0645161	6.80502	3.16458	0.0347216	0.242859	0.2116	DDR2/EMILIN1	2	BP	downreg	Mast cell
GO:0050818	regulation of coagulation	3/180	76/18986	0.0394737	4.1636	2.70356	0.0355941	0.24783	0.215931	EMILIN1/FAP/PRKG1	3	BP	downreg	Mast cell
GO:0048771	tissue remodeling	5/180	191/18986	0.026178	2.7612	2.3933	0.0356287	0.24783	0.215931	DDR2/PTH1R/FGF10/PPARGC1B/FLNA	5	BP	downreg	Mast cell
GO:0006935	chemotaxis	9/180	472/18986	0.0190678	2.01123	2.17652	0.0363636	0.249853	0.217694	PLEKHG5/TGFB2/UNC5C/FGF10/ITGA2/PDGFRB/FLT1/EFNB2/FLRT2	9	BP	downreg	Mast cell
GO:0030239	myofibril assembly	3/180	77/18986	0.038961	4.10952	2.67484	0.0367868	0.249853	0.217694	OBSCN/NEB/PDGFRB	3	BP	downreg	Mast cell
GO:0045669	positive regulation of osteoblast differentiation	3/180	77/18986	0.038961	4.10952	2.67484	0.0367868	0.249853	0.217694	DDR2/CCN4/YAP1	3	BP	downreg	Mast cell
GO:0070527	platelet aggregation	3/180	77/18986	0.038961	4.10952	2.67484	0.0367868	0.249853	0.217694	EMILIN1/PRKG1/FLNA	3	BP	downreg	Mast cell
GO:0009069	serine family amino acid metabolic process	2/180	32/18986	0.0625	6.59236	3.09751	0.03681	0.249853	0.217694	CDO1/SEPHS2	2	BP	downreg	Mast cell
GO:0060045	positive regulation of cardiac muscle cell proliferation	2/180	32/18986	0.0625	6.59236	3.09751	0.03681	0.249853	0.217694	FGFR2/YAP1	2	BP	downreg	Mast cell
GO:0060603	mammary gland duct morphogenesis	2/180	32/18986	0.0625	6.59236	3.09751	0.03681	0.249853	0.217694	FGF10/FGFR2	2	BP	downreg	Mast cell
GO:0061037	negative regulation of cartilage development	2/180	32/18986	0.0625	6.59236	3.09751	0.03681	0.249853	0.217694	CCN4/RARG	2	BP	downreg	Mast cell
GO:1902547	regulation of cellular response to vascular endothelial growth factor stimulus	2/180	32/18986	0.0625	6.59236	3.09751	0.03681	0.249853	0.217694	EMILIN1/DAB2IP	2	BP	downreg	Mast cell
GO:0098773	skin epidermis development	4/180	132/18986	0.030303	3.1963	2.47725	0.037061	0.250882	0.21859	TGFB2/FGF10/FGFR2/TNFRSF19	4	BP	downreg	Mast cell
GO:0042330	taxis	9/180	474/18986	0.0189873	2.00274	2.16294	0.0371958	0.251121	0.218799	PLEKHG5/TGFB2/UNC5C/FGF10/ITGA2/PDGFRB/FLT1/EFNB2/FLRT2	9	BP	downreg	Mast cell
GO:0055074	calcium ion homeostasis	7/180	329/18986	0.0212766	2.24421	2.22722	0.0376985	0.253836	0.221164	TMEM178A/PTH1R/PLCH1/GRIK2/CDH23/CEMIP/FLNA	7	BP	downreg	Mast cell
GO:0009132	nucleoside diphosphate metabolic process	4/180	133/18986	0.0300752	3.17226	2.45947	0.0379378	0.254298	0.221566	CARD11/OGDH/PFKM/ALDOC	4	BP	downreg	Mast cell
GO:0061045	negative regulation of wound healing	3/180	78/18986	0.0384615	4.05684	2.64661	0.0379998	0.254298	0.221566	FAP/PRKG1/TAFA5	3	BP	downreg	Mast cell
GO:0036293	response to decreased oxygen levels	7/180	331/18986	0.021148	2.23065	2.20975	0.0387465	0.254298	0.221566	DDAH1/DDR2/TGFB2/ITGA2/FGFR2/RORA/IRAK1	7	BP	downreg	Mast cell
GO:0002063	chondrocyte development	2/180	33/18986	0.0606061	6.39259	3.03326	0.0389455	0.254298	0.221566	COL27A1/RARG	2	BP	downreg	Mast cell
GO:0007288	sperm axoneme assembly	2/180	33/18986	0.0606061	6.39259	3.03326	0.0389455	0.254298	0.221566	DNAH1/CEP131	2	BP	downreg	Mast cell
GO:0010464	regulation of mesenchymal cell proliferation	2/180	33/18986	0.0606061	6.39259	3.03326	0.0389455	0.254298	0.221566	SYNE1/FGFR2	2	BP	downreg	Mast cell
GO:0031952	regulation of protein autophosphorylation	2/180	33/18986	0.0606061	6.39259	3.03326	0.0389455	0.254298	0.221566	NEK10/ENPP1	2	BP	downreg	Mast cell
GO:0060351	cartilage development involved in endochondral bone morphogenesis	2/180	33/18986	0.0606061	6.39259	3.03326	0.0389455	0.254298	0.221566	COL27A1/RARG	2	BP	downreg	Mast cell
GO:0061384	heart trabecula morphogenesis	2/180	33/18986	0.0606061	6.39259	3.03326	0.0389455	0.254298	0.221566	TGFB2/HEY1	2	BP	downreg	Mast cell
GO:1905207	regulation of cardiocyte differentiation	2/180	33/18986	0.0606061	6.39259	3.03326	0.0389455	0.254298	0.221566	TGFB2/EFNB2	2	BP	downreg	Mast cell
GO:0003015	heart process	6/180	262/18986	0.0229008	2.41552	2.25715	0.0390339	0.254298	0.221566	HSPB7/TGFB2/MYL3/YAP1/MAP2K3/FLNA	6	BP	downreg	Mast cell
GO:0071900	regulation of protein serine/threonine kinase activity	6/180	262/18986	0.0229008	2.41552	2.25715	0.0390339	0.254298	0.221566	NEK10/PDGFRB/SASH1/DAB2IP/FLT1/CEMIP	6	BP	downreg	Mast cell
GO:0051145	smooth muscle cell differentiation	3/180	79/18986	0.0379747	4.00549	2.61885	0.039233	0.254298	0.221566	FGF10/HEY1/FGFR2	3	BP	downreg	Mast cell
GO:0070373	negative regulation of ERK1 and ERK2 cascade	3/180	79/18986	0.0379747	4.00549	2.61885	0.039233	0.254298	0.221566	EMILIN1/WNK2/DAB2IP	3	BP	downreg	Mast cell
GO:0072001	renal system development	7/180	332/18986	0.0210843	2.22393	2.20106	0.0392776	0.254298	0.221566	TGFB2/POU3F3/FGF10/PDGFRB/FGFR2/YAP1/EFNB2	7	BP	downreg	Mast cell
GO:0050678	regulation of epithelial cell proliferation	8/180	406/18986	0.0197044	2.07838	2.14885	0.0400868	0.258872	0.225552	TGFB2/FGF10/LAMB1/DAB2IP/FGFR2/YAP1/FLT1/EFNB2	8	BP	downreg	Mast cell
GO:0030324	lung development	5/180	198/18986	0.0252525	2.66358	2.30213	0.0405779	0.261106	0.227498	HSD11B1/FGF10/RSPO2/FGFR2/YAP1	5	BP	downreg	Mast cell
GO:0030879	mammary gland development	4/180	136/18986	0.0294118	3.10229	2.40713	0.0406394	0.261106	0.227498	FGF10/ITGA2/CDO1/FGFR2	4	BP	downreg	Mast cell
GO:0046320	regulation of fatty acid oxidation	2/180	34/18986	0.0588235	6.20458	2.9716	0.0411271	0.261576	0.227908	FMO2/ACADL	2	BP	downreg	Mast cell
GO:0048240	sperm capacitation	2/180	34/18986	0.0588235	6.20458	2.9716	0.0411271	0.261576	0.227908	CATSPERE/C2CD6	2	BP	downreg	Mast cell
GO:0098884	postsynaptic neurotransmitter receptor internalization	2/180	34/18986	0.0588235	6.20458	2.9716	0.0411271	0.261576	0.227908	SYNE1/EFNB2	2	BP	downreg	Mast cell
GO:0140239	postsynaptic endocytosis	2/180	34/18986	0.0588235	6.20458	2.9716	0.0411271	0.261576	0.227908	SYNE1/EFNB2	2	BP	downreg	Mast cell
GO:0048565	digestive tract development	4/180	137/18986	0.0291971	3.07964	2.39	0.0415637	0.262953	0.229107	TGFB2/FGF10/FGFR2/YAP1	4	BP	downreg	Mast cell
GO:0021536	diencephalon development	3/180	81/18986	0.037037	3.90658	2.56466	0.04176	0.262953	0.229107	FGF10/PITX1/OGDH	3	BP	downreg	Mast cell
GO:0048644	muscle organ morphogenesis	3/180	81/18986	0.037037	3.90658	2.56466	0.04176	0.262953	0.229107	TGFB2/MYL3/FGFR2	3	BP	downreg	Mast cell
GO:2000027	regulation of animal organ morphogenesis	3/180	81/18986	0.037037	3.90658	2.56466	0.04176	0.262953	0.229107	FGF10/RSPO2/STOX1	3	BP	downreg	Mast cell
GO:0003151	outflow tract morphogenesis	3/180	82/18986	0.0365854	3.85894	2.53822	0.0430536	0.270291	0.235501	DHRS3/TGFB2/FGFR2	3	BP	downreg	Mast cell
GO:0048333	mesodermal cell differentiation	2/180	35/18986	0.0571429	6.0273	2.91237	0.0433536	0.270291	0.235501	ITGA2/FGFR2	2	BP	downreg	Mast cell
GO:0060191	regulation of lipase activity	2/180	35/18986	0.0571429	6.0273	2.91237	0.0433536	0.270291	0.235501	PLA2R1/FGFR2	2	BP	downreg	Mast cell
GO:0110110	positive regulation of animal organ morphogenesis	2/180	35/18986	0.0571429	6.0273	2.91237	0.0433536	0.270291	0.235501	FGF10/STOX1	2	BP	downreg	Mast cell
GO:0007369	gastrulation	5/180	202/18986	0.0247525	2.61084	2.25178	0.0435845	0.270395	0.235592	COL8A1/ITGA2/LAMB1/FGFR2/COL4A2	5	BP	downreg	Mast cell
GO:0030323	respiratory tube development	5/180	202/18986	0.0247525	2.61084	2.25178	0.0435845	0.270395	0.235592	HSD11B1/FGF10/RSPO2/FGFR2/YAP1	5	BP	downreg	Mast cell
GO:0001894	tissue homeostasis	6/180	270/18986	0.0222222	2.34395	2.17597	0.0440858	0.2715	0.236555	PTH1R/CYTL1/PPARGC1B/GCNT2/CDH23/YAP1	6	BP	downreg	Mast cell
GO:0060249	anatomical structure homeostasis	6/180	270/18986	0.0222222	2.34395	2.17597	0.0440858	0.2715	0.236555	PTH1R/CYTL1/PPARGC1B/GCNT2/CDH23/YAP1	6	BP	downreg	Mast cell
GO:0016049	cell growth	9/180	490/18986	0.0183673	1.93735	2.05661	0.0443264	0.2715	0.236555	TNN/TGFB2/CDKN2AIP/ENPP1/PRKG1/YAP1/RERG/RARG/PAK4	9	BP	downreg	Mast cell
GO:0021953	central nervous system neuron differentiation	5/180	203/18986	0.0246305	2.59797	2.23939	0.0443565	0.2715	0.236555	OGDH/FGFR2/RORA/CDH11/B4GALT6	5	BP	downreg	Mast cell
GO:0060606	tube closure	3/180	83/18986	0.0361446	3.81245	2.51219	0.0443671	0.2715	0.236555	TGFB2/FGF10/RARG	3	BP	downreg	Mast cell
GO:0046328	regulation of JNK cascade	4/180	140/18986	0.0285714	3.01365	2.33955	0.0444078	0.2715	0.236555	GRIK2/MDFIC/DAB2IP/TNFRSF19	4	BP	downreg	Mast cell
GO:0018108	peptidyl-tyrosine phosphorylation	5/180	204/18986	0.0245098	2.58524	2.22706	0.0451368	0.274627	0.239279	DDR2/FGF10/PDGFRB/FGFR2/FLT1	5	BP	downreg	Mast cell
GO:0031099	regeneration	5/180	204/18986	0.0245098	2.58524	2.22706	0.0451368	0.274627	0.239279	PTPRU/FGF10/MATN2/YAP1/FLNA	5	BP	downreg	Mast cell
GO:0010765	positive regulation of sodium ion transport	2/180	36/18986	0.0555556	5.85988	2.85539	0.0456241	0.2756	0.240127	WNK2/FXYD3	2	BP	downreg	Mast cell
GO:0033687	osteoblast proliferation	2/180	36/18986	0.0555556	5.85988	2.85539	0.0456241	0.2756	0.240127	TNN/FGFR2	2	BP	downreg	Mast cell
GO:0060317	cardiac epithelial to mesenchymal transition	2/180	36/18986	0.0555556	5.85988	2.85539	0.0456241	0.2756	0.240127	TGFB2/HEY1	2	BP	downreg	Mast cell
GO:0051235	maintenance of location	7/180	345/18986	0.0202899	2.14013	2.09085	0.0466198	0.280887	0.244733	PLCH1/CDS1/ENPP1/SYNE1/GPAA1/CEMIP/FLNA	7	BP	downreg	Mast cell
GO:0018212	peptidyl-tyrosine modification	5/180	206/18986	0.0242718	2.56014	2.20264	0.0467218	0.280887	0.244733	DDR2/FGF10/PDGFRB/FGFR2/FLT1	5	BP	downreg	Mast cell
GO:0014855	striated muscle cell proliferation	3/180	85/18986	0.0352941	3.72275	2.46132	0.0470534	0.282209	0.245885	TGFB2/FGFR2/YAP1	3	BP	downreg	Mast cell
GO:0016331	morphogenesis of embryonic epithelium	4/180	143/18986	0.027972	2.95043	2.29043	0.0473585	0.283366	0.246893	TGFB2/FGF10/FGFR2/RARG	4	BP	downreg	Mast cell
GO:0010092	specification of animal organ identity	2/180	37/18986	0.0540541	5.7015	2.80051	0.0479376	0.283472	0.246985	FGF10/FGFR2	2	BP	downreg	Mast cell
GO:0010799	regulation of peptidyl-threonine phosphorylation	2/180	37/18986	0.0540541	5.7015	2.80051	0.0479376	0.283472	0.246985	STOX1/CEMIP	2	BP	downreg	Mast cell
GO:0021955	central nervous system neuron axonogenesis	2/180	37/18986	0.0540541	5.7015	2.80051	0.0479376	0.283472	0.246985	CDH11/B4GALT6	2	BP	downreg	Mast cell
GO:0031076	embryonic camera-type eye development	2/180	37/18986	0.0540541	5.7015	2.80051	0.0479376	0.283472	0.246985	FGF10/RARG	2	BP	downreg	Mast cell
GO:0034110	regulation of homotypic cell-cell adhesion	2/180	37/18986	0.0540541	5.7015	2.80051	0.0479376	0.283472	0.246985	EMILIN1/PRKG1	2	BP	downreg	Mast cell
GO:1904064	positive regulation of cation transmembrane transport	4/180	144/18986	0.0277778	2.92994	2.27434	0.0483658	0.285025	0.248339	WNK2/CEMIP/FXYD3/FLNA	4	BP	downreg	Mast cell
GO:0001570	vasculogenesis	3/180	86/18986	0.0348837	3.67946	2.43646	0.0484261	0.285025	0.248339	PDGFRB/HEY1/YAP1	3	BP	downreg	Mast cell
GO:1901605	alpha-amino acid metabolic process	5/180	209/18986	0.0239234	2.52339	2.16653	0.0491609	0.288361	0.251245	DDAH1/CDO1/HMGCLL1/SEPHS2/ILVBL	5	BP	downreg	Mast cell
GO:0009117	nucleotide metabolic process	9/180	500/18986	0.018	1.8986	1.99216	0.0492212	0.288361	0.251245	FMO2/GUCY1B1/ENPP1/CARD11/OGDH/GUCY1A2/PFKM/RORA/ALDOC	9	BP	downreg	Mast cell
GO:0021700	developmental maturation	7/180	350/18986	0.02	2.10956	2.04975	0.0496631	0.289175	0.251955	TGFB2/CATSPERE/C2CD6/PTH1R/DAB2IP/B4GALT6/SYP	7	BP	downreg	Mast cell
GO:0005977	glycogen metabolic process	3/180	87/18986	0.0344828	3.63716	2.41196	0.0498183	0.289175	0.251955	ENPP1/ATG2A/PFKM	3	BP	downreg	Mast cell
GO:0007492	endoderm development	3/180	87/18986	0.0344828	3.63716	2.41196	0.0498183	0.289175	0.251955	COL8A1/LAMB1/COL4A2	3	BP	downreg	Mast cell
GO:0099068	postsynapse assembly	3/180	87/18986	0.0344828	3.63716	2.41196	0.0498183	0.289175	0.251955	CSMD2/NCKIPSD/FLRT2	3	BP	downreg	Mast cell
GO:0005201	extracellular matrix structural constituent	10/184	166/18737	0.060241	6.13443	6.61712	5.78015e-06	0.00252592	0.00228164	EMILIN1/COL8A1/ABI3BP/COL19A1/THBS2/LAMB1/MATN2/COL27A1/COL4A2/THSD4	10	MF	downreg	Mast cell
GO:1901681	sulfur compound binding	11/184	277/18737	0.0397112	4.04385	5.08262	9.5693e-05	0.0209089	0.0188868	ACADL/FGF10/ITGA2/ENPP1/THBS2/OGDH/RSPO2/CCN4/FGFR2/ILVBL/ADAMTS5	11	MF	downreg	Mast cell
GO:0106310	protein serine kinase activity	11/184	363/18737	0.030303	3.0858	3.99637	0.000951202	0.0840935	0.0759607	OBSCN/NEK10/STK32B/STK32A/CDK14/WNK2/PRKG1/MAP2K3/MAPK4/PAK4/IRAK1	11	MF	downreg	Mast cell
GO:0030020	extracellular matrix structural constituent conferring tensile strength	4/184	45/18737	0.0888889	9.05169	5.38525	0.0009793	0.0840935	0.0759607	COL8A1/COL19A1/COL27A1/COL4A2	4	MF	downreg	Mast cell
GO:0005178	integrin binding	7/184	161/18737	0.0434783	4.42746	4.3496	0.00107616	0.0840935	0.0759607	TNN/EMILIN1/FAP/ITGA2/CCN4/ADAMTS5/ITGB1BP2	7	MF	downreg	Mast cell
GO:0032266	phosphatidylinositol-3-phosphate binding	4/184	47/18737	0.0851064	8.66651	5.24062	0.0011546	0.0840935	0.0759607	OBSCN/DAB2IP/SH3PXD2A/ATG2A	4	MF	downreg	Mast cell
GO:0004714	transmembrane receptor protein tyrosine kinase activity	4/184	60/18737	0.0666667	6.78877	4.47248	0.00285943	0.137322	0.124041	DDR2/PDGFRB/FGFR2/FLT1	4	MF	downreg	Mast cell
GO:0008106	alcohol dehydrogenase (NADP+) activity	3/184	30/18737	0.1	10.1832	5.01292	0.00311215	0.137322	0.124041	DHRS3/KCNAB1/AKR1C1	3	MF	downreg	Mast cell
GO:0140297	DNA-binding transcription factor binding	12/184	488/18737	0.0245902	2.50405	3.35269	0.0032708	0.137322	0.124041	PITX1/CXXC5/PPARGC1B/GMNN/MDFIC/HEY1/RUNX1T1/YAP1/ETS1/RERG/RARG/FLNA	12	MF	downreg	Mast cell
GO:0070273	phosphatidylinositol-4-phosphate binding	3/184	31/18737	0.0967742	9.85466	4.91363	0.00342093	0.137322	0.124041	OBSCN/DAB2IP/SH3PXD2A	3	MF	downreg	Mast cell
GO:0004674	protein serine/threonine kinase activity	11/184	429/18737	0.025641	2.61106	3.36172	0.00351241	0.137322	0.124041	OBSCN/NEK10/STK32B/STK32A/CDK14/WNK2/PRKG1/MAP2K3/MAPK4/PAK4/IRAK1	11	MF	downreg	Mast cell
GO:0016829	lyase activity	7/184	201/18737	0.0348259	3.54637	3.61453	0.00377085	0.137322	0.124041	ETNPPL/GUCY1B1/HMGCLL1/CA3/GUCY1A2/ALDOC/ILVBL	7	MF	downreg	Mast cell
GO:0098631	cell adhesion mediator activity	4/184	69/18737	0.057971	5.90328	4.06352	0.00473507	0.159171	0.143778	EMILIN1/EMB/ITGA2/PAK4	4	MF	downreg	Mast cell
GO:0004033	aldo-keto reductase (NADPH) activity	3/184	36/18737	0.0833333	8.48596	4.4772	0.0052425	0.163641	0.147815	DHRS3/KCNAB1/AKR1C1	3	MF	downreg	Mast cell
GO:0019199	transmembrane receptor protein kinase activity	4/184	79/18737	0.0506329	5.15603	3.68638	0.00763069	0.207574	0.187499	DDR2/PDGFRB/FGFR2/FLT1	4	MF	downreg	Mast cell
GO:0008201	heparin binding	6/184	176/18737	0.0340909	3.47153	3.28066	0.00792656	0.207574	0.187499	FGF10/THBS2/RSPO2/CCN4/FGFR2/ADAMTS5	6	MF	downreg	Mast cell
GO:0008307	structural constituent of muscle	3/184	42/18737	0.0714286	7.27368	4.05345	0.00807498	0.207574	0.187499	OBSCN/NEB/MYL3	3	MF	downreg	Mast cell
GO:0004970	glutamate-gated receptor activity	2/184	16/18737	0.125	12.7289	4.67406	0.010514	0.208685	0.188502	GRIK2/GRIA4	2	MF	downreg	Mast cell
GO:0031435	mitogen-activated protein kinase kinase kinase binding	2/184	16/18737	0.125	12.7289	4.67406	0.010514	0.208685	0.188502	SASH1/DAB2IP	2	MF	downreg	Mast cell
GO:0099507	ligand-gated monoatomic ion channel activity involved in regulation of presynaptic membrane potential	2/184	16/18737	0.125	12.7289	4.67406	0.010514	0.208685	0.188502	GRIK2/GRIA4	2	MF	downreg	Mast cell
GO:0005539	glycosaminoglycan binding	7/184	246/18737	0.0284553	2.89764	2.98361	0.0109834	0.208685	0.188502	FGF10/THBS2/RSPO2/CCN4/FGFR2/CEMIP/ADAMTS5	7	MF	downreg	Mast cell
GO:0044024	histone H2AS1 kinase activity	7/184	246/18737	0.0284553	2.89764	2.98361	0.0109834	0.208685	0.188502	OBSCN/NEK10/STK32B/STK32A/WNK2/PAK4/IRAK1	7	MF	downreg	Mast cell
GO:0140995	histone H2A kinase activity	7/184	246/18737	0.0284553	2.89764	2.98361	0.0109834	0.208685	0.188502	OBSCN/NEK10/STK32B/STK32A/WNK2/PAK4/IRAK1	7	MF	downreg	Mast cell
GO:0004713	protein tyrosine kinase activity	5/184	138/18737	0.0362319	3.68955	3.15802	0.0117441	0.213841	0.19316	DDR2/PDGFRB/FGFR2/FLT1/MAP2K3	5	MF	downreg	Mast cell
GO:0035173	histone kinase activity	7/184	256/18737	0.0273438	2.78446	2.86288	0.013437	0.234878	0.212163	OBSCN/NEK10/STK32B/STK32A/WNK2/PAK4/IRAK1	7	MF	downreg	Mast cell
GO:0018455	alcohol dehydrogenase [NAD(P)+] activity	3/184	52/18737	0.0576923	5.8749	3.50559	0.0144759	0.243307	0.219776	DHRS3/KCNAB1/AKR1C1	3	MF	downreg	Mast cell
GO:0050661	NADP binding	3/184	54/18737	0.0555556	5.65731	3.4131	0.0160179	0.250323	0.226114	FMO2/HSD11B1/KCNAB1	3	MF	downreg	Mast cell
GO:0009975	cyclase activity	2/184	21/18737	0.0952381	9.69824	3.97169	0.0178187	0.250323	0.226114	GUCY1B1/GUCY1A2	2	MF	downreg	Mast cell
GO:0010314	phosphatidylinositol-5-phosphate binding	2/184	21/18737	0.0952381	9.69824	3.97169	0.0178187	0.250323	0.226114	OBSCN/SH3PXD2A	2	MF	downreg	Mast cell
GO:0004879	nuclear receptor activity	3/184	59/18737	0.0508475	5.17787	3.20078	0.0202622	0.250323	0.226114	ESRRG/RARG/RORA	3	MF	downreg	Mast cell
GO:0015459	potassium channel regulator activity	3/184	59/18737	0.0508475	5.17787	3.20078	0.0202622	0.250323	0.226114	DPP10/KCNAB1/FLNA	3	MF	downreg	Mast cell
GO:0016627	oxidoreductase activity, acting on the CH-CH group of donors	3/184	59/18737	0.0508475	5.17787	3.20078	0.0202622	0.250323	0.226114	MECR/ACADL/AKR1C1	3	MF	downreg	Mast cell
GO:0099106	ion channel regulator activity	5/184	159/18737	0.0314465	3.20225	2.77719	0.0204642	0.250323	0.226114	DPP10/KCNAB1/PRKG1/FXYD3/FLNA	5	MF	downreg	Mast cell
GO:0008013	beta-catenin binding	4/184	106/18737	0.0377358	3.8427	2.92285	0.0205998	0.250323	0.226114	PTPRU/CDH23/RORA/CDH11	4	MF	downreg	Mast cell
GO:0098531	ligand-activated transcription factor activity	3/184	60/18737	0.05	5.09158	3.16121	0.0211781	0.250323	0.226114	ESRRG/RARG/RORA	3	MF	downreg	Mast cell
GO:0016849	phosphorus-oxygen lyase activity	2/184	23/18737	0.0869565	8.85491	3.75372	0.0211944	0.250323	0.226114	GUCY1B1/GUCY1A2	2	MF	downreg	Mast cell
GO:0031681	G-protein beta-subunit binding	2/184	23/18737	0.0869565	8.85491	3.75372	0.0211944	0.250323	0.226114	GNG11/RASD2	2	MF	downreg	Mast cell
GO:0005496	steroid binding	4/184	108/18737	0.037037	3.77154	2.87659	0.0218933	0.25099	0.226716	HSD11B1/ESRRG/RORA/SYP	4	MF	downreg	Mast cell
GO:0004114	3',5'-cyclic-nucleotide phosphodiesterase activity	2/184	24/18737	0.0833333	8.48596	3.65445	0.0229739	0.25099	0.226716	ENPP1/PDE1C	2	MF	downreg	Mast cell
GO:0004115	3',5'-cyclic-AMP phosphodiesterase activity	2/184	24/18737	0.0833333	8.48596	3.65445	0.0229739	0.25099	0.226716	ENPP1/PDE1C	2	MF	downreg	Mast cell
GO:0016247	channel regulator activity	5/184	167/18737	0.0299401	3.04885	2.64851	0.0246666	0.259379	0.234294	DPP10/KCNAB1/PRKG1/FXYD3/FLNA	5	MF	downreg	Mast cell
GO:0141108	transporter regulator activity	5/184	169/18737	0.0295858	3.01277	2.61755	0.0257976	0.259379	0.234294	DPP10/KCNAB1/PRKG1/FXYD3/FLNA	5	MF	downreg	Mast cell
GO:0004112	cyclic-nucleotide phosphodiesterase activity	2/184	26/18737	0.0769231	7.83319	3.47218	0.0267095	0.259379	0.234294	ENPP1/PDE1C	2	MF	downreg	Mast cell
GO:0005104	fibroblast growth factor receptor binding	2/184	26/18737	0.0769231	7.83319	3.47218	0.0267095	0.259379	0.234294	FGF10/FLRT2	2	MF	downreg	Mast cell
GO:0008066	glutamate receptor activity	2/184	26/18737	0.0769231	7.83319	3.47218	0.0267095	0.259379	0.234294	GRIK2/GRIA4	2	MF	downreg	Mast cell
GO:0005518	collagen binding	3/184	69/18737	0.0434783	4.42746	2.84046	0.0304286	0.289072	0.261115	DDR2/ITGA2/COCH	3	MF	downreg	Mast cell
GO:0016616	oxidoreductase activity, acting on the CH-OH group of donors, NAD or NADP as acceptor	4/184	122/18737	0.0327869	3.33874	2.58089	0.0323289	0.291941	0.263707	DHRS3/HSD11B1/KCNAB1/AKR1C1	4	MF	downreg	Mast cell
GO:0016769	transferase activity, transferring nitrogenous groups	2/184	29/18737	0.0689655	7.02286	3.23243	0.0327348	0.291941	0.263707	ETNPPL/GPAA1	2	MF	downreg	Mast cell
GO:0043325	phosphatidylinositol-3,4-bisphosphate binding	2/184	29/18737	0.0689655	7.02286	3.23243	0.0327348	0.291941	0.263707	OBSCN/SH3PXD2A	2	MF	downreg	Mast cell
GO:0033764	steroid dehydrogenase activity, acting on the CH-OH group of donors, NAD or NADP as acceptor	2/184	30/18737	0.0666667	6.78877	3.15998	0.0348507	0.304596	0.275137	HSD11B1/AKR1C1	2	MF	downreg	Mast cell
GO:0016628	oxidoreductase activity, acting on the CH-CH group of donors, NAD or NADP as acceptor	2/184	32/18737	0.0625	6.36447	3.02457	0.0392364	0.335872	0.303389	MECR/AKR1C1	2	MF	downreg	Mast cell
GO:0016614	oxidoreductase activity, acting on CH-OH group of donors	4/184	132/18737	0.030303	3.0858	2.39489	0.0412941	0.335872	0.303389	DHRS3/HSD11B1/KCNAB1/AKR1C1	4	MF	downreg	Mast cell
GO:0019838	growth factor binding	4/184	132/18737	0.030303	3.0858	2.39489	0.0412941	0.335872	0.303389	PDGFRB/FGFR2/ERBB3/FLT1	4	MF	downreg	Mast cell
GO:0016229	steroid dehydrogenase activity	2/184	33/18737	0.0606061	6.17161	2.96112	0.0415037	0.335872	0.303389	HSD11B1/AKR1C1	2	MF	downreg	Mast cell
GO:0030332	cyclin binding	2/184	34/18737	0.0588235	5.99009	2.90023	0.0438191	0.341983	0.308909	CDK14/MDFIC	2	MF	downreg	Mast cell
GO:0016758	hexosyltransferase activity	5/184	197/18737	0.0253807	2.58456	2.22652	0.0451699	0.341983	0.308909	GCNT2/CSGALNACT1/FUT11/POGLUT3/B4GALT6	5	MF	downreg	Mast cell
GO:0016709	oxidoreductase activity, acting on paired donors, with incorporation or reduction of molecular oxygen, NAD(P)H as one donor, and incorporation of one atom of oxygen	2/184	35/18737	0.0571429	5.81894	2.84173	0.0461814	0.341983	0.308909	FMO2/AKR1C1	2	MF	downreg	Mast cell
GO:0030165	PDZ domain binding	3/184	82/18737	0.0365854	3.72554	2.46322	0.0469451	0.341983	0.308909	ARHGAP29/GRIK2/NKD1	3	MF	downreg	Mast cell
GO:0045296	cadherin binding	7/184	334/18737	0.0209581	2.13419	2.08284	0.0471997	0.341983	0.308909	CIP2A/DAB2IP/MPP7/CDH23/CDH11/PAK4/FLNA	7	MF	downreg	Mast cell
GO:0070851	growth factor receptor binding	4/184	138/18737	0.0289855	2.95164	2.29158	0.0472842	0.341983	0.308909	FGF10/PDGFRB/DAB2IP/FLRT2	4	MF	downreg	Mast cell
GO:0001540	amyloid-beta binding	3/184	83/18737	0.0361446	3.68066	2.43744	0.048366	0.341983	0.308909	TGFB2/ITGA2/GRIA4	3	MF	downreg	Mast cell
GO:0016757	glycosyltransferase activity	6/184	267/18737	0.0224719	2.28835	2.11152	0.0485193	0.341983	0.308909	ST3GAL6/GCNT2/CSGALNACT1/FUT11/POGLUT3/B4GALT6	6	MF	downreg	Mast cell
GO:0062023	collagen-containing extracellular matrix	17/190	430/19960	0.0395349	4.15324	6.48013	8.24846e-07	0.000226008	0.000204909	TNN/TGFB2/EMILIN1/COL8A1/ABI3BP/FGF10/COL19A1/THBS2/LAMB1/MATN2/COL27A1/FGFR2/CDON/COL4A2/COCH/THSD4/ADAMTS5	17	CC	downreg	Mast cell
[truncated: 6,057 more rows]
