# Supplementary material for: Transcriptomic Atlas of Human Trabecular Meshwork Uncovers the Cellular Landscape and Provides Insights into Glaucoma Pathophysiology
Source: Research Square preprint supplement (doi:10.21203/rs.3.rs-9540265/v1), 2026-06-22

a

**Macrophage, DEG num: 133**Glaucoma(up-reg.) vs Normal,  $p_{adj} < 0.05$ ,  $|\log FC| > 1$ 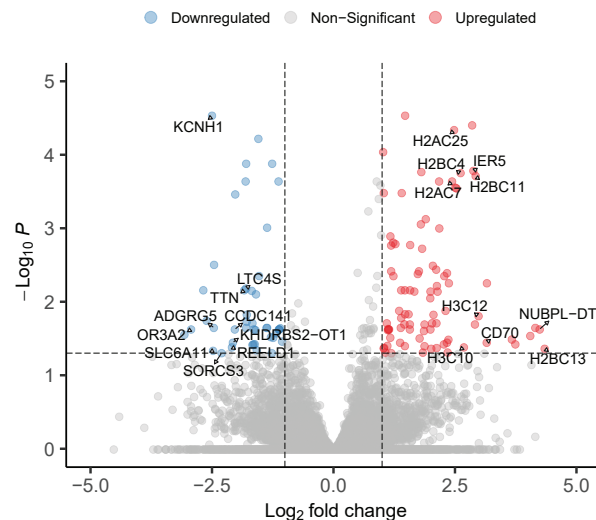

b

**Mast cell, DEG num: 235**Glaucoma(up-reg.) vs Normal,  $p_{adj} < 0.05$ ,  $|\log FC| > 1$ 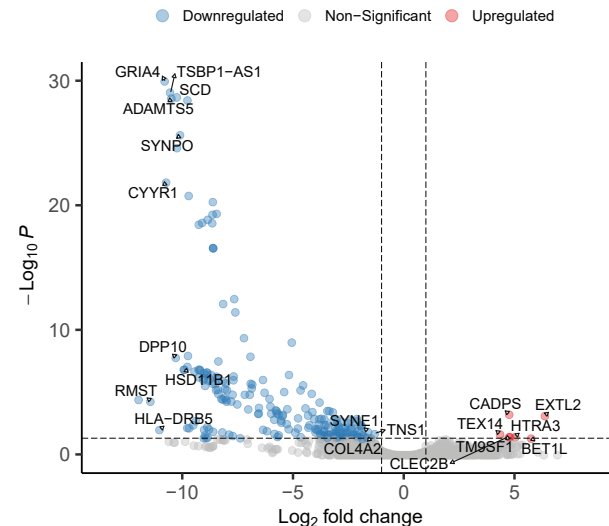

c

**T/NK cell, DEG num: 2**Glaucoma(up-reg.) vs Normal,  $p_{adj} < 0.05$ ,  $|\log FC| > 1$ 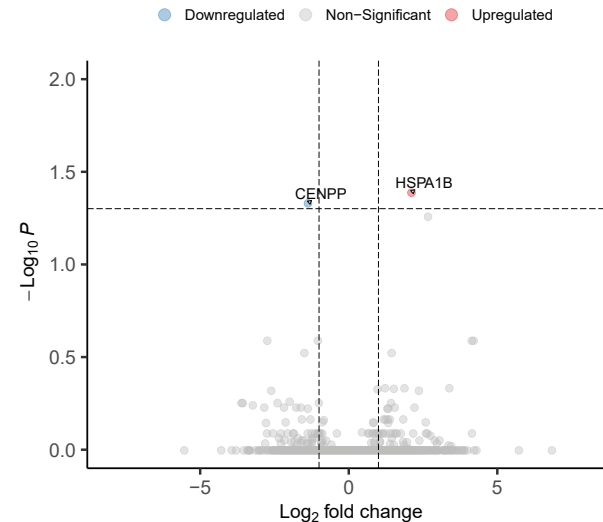

d

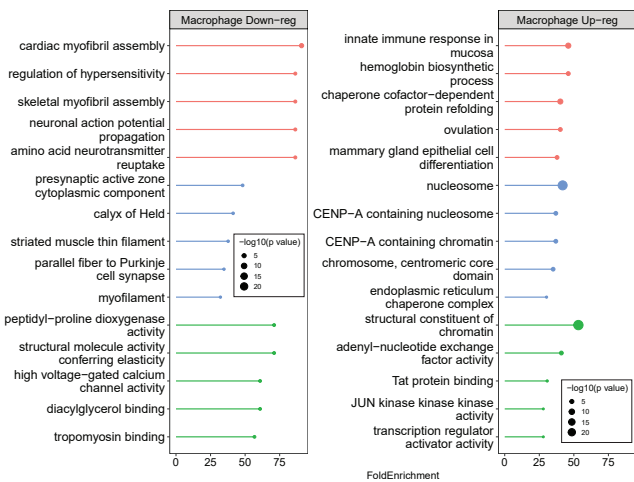

e

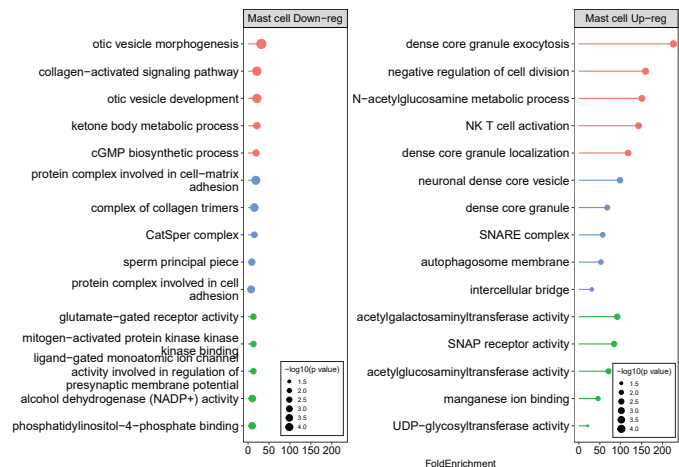

f

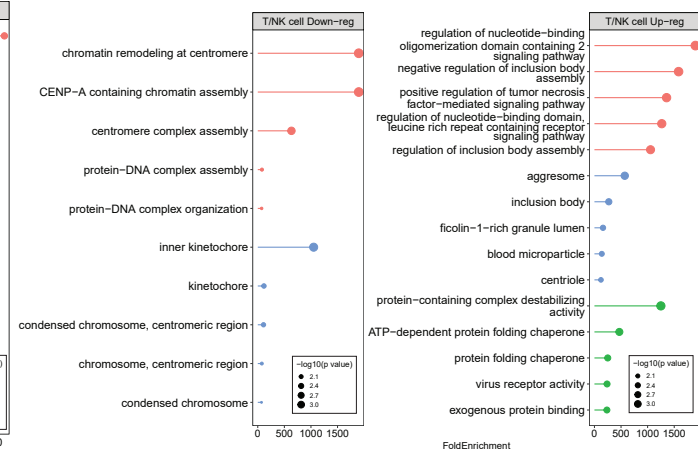

Supplement: Supplementary file 8 [file 6dec381d158ce6cf4ac742c9.pdf]
