# Supplementary material for: Transcriptomic Atlas of Human Trabecular Meshwork Uncovers the Cellular Landscape and Provides Insights into Glaucoma Pathophysiology
Source: Research Square preprint supplement (doi:10.21203/rs.3.rs-9540265/v1), 2026-06-22
Supplement: Supplementary file 8 [file beaa1076bb3c4c09b8602af6.xlsx]

## Sheet: Sheet1
S. No	Antibody Name	RRID	Dilution	Catalog Number	Company
Primry Antibodies
1	apoD Antibody (C-1) HRP Antibody	NA	01:50:00	sc-373965 HRP	Santa Cruz Biotechnology
2	TMEFF2 Polyclonal Antibody	NA	1:100	11928-1-AP	Proteintech
3	CD163 Polyclonal Antibody	AB_2756528	1:100	16646-1-AP	Proteintech
4	Metallothionein Antibody (UC1MT)	AB_11190617	1:10	NBP1-97493-0.2mg	Novus Biologicals
5	IL1R1 Polyclonal Antibody	AB_2812480	1:20	PA5-97866	Thermo Fisher Scientific
6	IL1R2 Polyclonal Antibody	AB_11152697	1:50	PA5-21974	Thermo Fisher Scientific
Secondary Antibodies
1	Goat anti-rabbit 568	AB_143157	1:250 -1:500	A11011	Invitrogen
2	Goat anti-mouse 568	NA	1:250 -1:500	A110046	Invitrogen
3	Donkey anti-mouse 647	AB_162542	1:250 -1:500	A31571	Invitrogen
		RRID:
