# Supplementary material for: Transcriptomic Atlas of Human Trabecular Meshwork Uncovers the Cellular Landscape and Provides Insights into Glaucoma Pathophysiology
Source: Research Square preprint supplement (doi:10.21203/rs.3.rs-9540265/v1), 2026-06-22
Supplement: Supplementary file 10 [file 74e3a319bd8fb06152a635c1.docx]

| S. No | Cell Type | Markers | Reference |
| --- | --- | --- | --- |
| 1 | TM-BeamA | BMP5,RARRES1 | 1-3 |
| 2 | TM-BeamB | TMEFF2 | 2,3 |
| 3 | TM-CS | COL4A4 | 4,5 |
| 4 | TM-JCT | ANGPTL7, RSPO4 | 1,2,6 |
| 5 | TM-Fib | TAGLN, ACTA2 | 6,7 |
| 6 | TM-Myo | TAGLN, RGS5, MYH11 | 6,7 |
| 7 | TM-Uveal | APOD, IGFBP5 | 8 |
| 8 | CM | CHRM3 | 2,6 |
| 9 | Pericyte | PDGFRB,TRPC4 | 1 |
| 10 | Melanocyte | DCT, MLANA, TYRP1 | 2,6 |
| 11 | Schmy | MPZ | 1-3 |
| 12 | SchNmy | SCN7A | 1 |
| 13 | scEndo | SMAD1 | CellMarker 2.0 |
| 14 | vEndo | VWF, FLT1, SEC14L1 | 1-3,6 |
| 15 | Mast cell | KIT,CPA3 | 2 |
| 16 | Macrophage | CD163 | 1 |
| 17 | T/NK cell | IL7R, ITK | 2,6 |

Supplementary Table 4: Marker genes used for cell-type annotation

Marker genes were curated from published single-cell, single-nucleus, and spatial transcriptomic studies of the AH outflow pathway across human, mouse, and non-human primate dataset.

**References**

1 Jia, X. et al. Cell atlas of trabecular meshwork in glaucomatous non-human primates and DEGs related to tissue contract based on single-cell transcriptomics. *iScience* 26, 108024 (2023). https://doi.org/10.1016/j.isci.2023.108024

2 Tian, A. et al. Divergence in cellular markers observed in single-cell transcriptomics datasets between cultured primary trabecular meshwork cells and tissues. *Sci Data* 12, 264 (2025). https://doi.org/10.1038/s41597-025-04528-5

3 van Zyl, T. et al. Cell atlas of aqueous humor outflow pathways in eyes of humans and four model species provides insight into glaucoma pathogenesis. *Proc Natl Acad Sci* U S A 117, 10339–10349 (2020). https://doi.org/10.1073/pnas.2001250117

4 Gonzalez, J. M., Jr., Heur, M. & Tan, J. C. Two-photon immunofluorescence characterization of the trabecular meshwork in situ. *Invest Ophthalmol Vis Sci* 53, 3395–3404 (2012). https://doi.org/10.1167/iovs.11-8570

5 Ueda, J. & Yue, B. Y. Distribution of myocilin and extracellular matrix components in the corneoscleral meshwork of human eyes. *Invest Ophthalmol Vis Sci* 44, 4772–4779 (2003). https://doi.org/10.1167/iovs.02-1002

6 Patel, G. et al. Molecular taxonomy of human ocular outflow tissues defined by single-cell transcriptomics. *Proc Natl Acad Sci U S A* 117, 12856–12867 (2020). https://doi.org/10.1073/pnas.2001896117

7 Tian, B., Gabelt, B. T., Geiger, B. & Kaufman, P. L. The role of the actomyosin system in regulating trabecular fluid outflow. *Exp Eye Res* 88, 713–717 (2009). https://doi.org/10.1016/j.exer.2008.08.008

8 van Zyl, T. et al. Cell atlas of the human ocular anterior segment: Tissue-specific and shared cell types. *Proc Natl Acad Sci U S A* 119, e2200914119 (2022). https://doi.org/10.1073/pnas.2200914119

1 Jia, X. *et al.* Cell atlas of trabecular meshwork in glaucomatous non-human primates and DEGs related to tissue contract based on single-cell transcriptomics. *iScience* **26**, 108024 (2023). <https://doi.org/10.1016/j.isci.2023.108024>

2 Tian, A. *et al.* Divergence in cellular markers observed in single-cell transcriptomics datasets between cultured primary trabecular meshwork cells and tissues. *Sci Data* **12**, 264 (2025). <https://doi.org/10.1038/s41597-025-04528-5>

3 van Zyl, T. *et al.* Cell atlas of aqueous humor outflow pathways in eyes of humans and four model species provides insight into glaucoma pathogenesis. *Proc Natl Acad Sci U S A* **117**, 10339–10349 (2020). <https://doi.org/10.1073/pnas.2001250117>

4 Gonzalez, J. M., Jr., Heur, M. & Tan, J. C. Two-photon immunofluorescence characterization of the trabecular meshwork in situ. *Invest Ophthalmol Vis Sci* **53**, 3395–3404 (2012). <https://doi.org/10.1167/iovs.11-8570>

5 Ueda, J. & Yue, B. Y. Distribution of myocilin and extracellular matrix components in the corneoscleral meshwork of human eyes. *Invest Ophthalmol Vis Sci* **44**, 4772–4779 (2003). <https://doi.org/10.1167/iovs.02-1002>

6 Patel, G. *et al.* Molecular taxonomy of human ocular outflow tissues defined by single-cell transcriptomics. *Proc Natl Acad Sci U S A* **117**, 12856–12867 (2020). <https://doi.org/10.1073/pnas.2001896117>

7 Tian, B., Gabelt, B. T., Geiger, B. & Kaufman, P. L. The role of the actomyosin system in regulating trabecular fluid outflow. *Exp Eye Res* **88**, 713–717 (2009). <https://doi.org/10.1016/j.exer.2008.08.008>

8 van Zyl, T. *et al.* Cell atlas of the human ocular anterior segment: Tissue-specific and shared cell types. *Proc Natl Acad Sci U S A* **119**, e2200914119 (2022). <https://doi.org/10.1073/pnas.2200914119>
