# Supplementary figures and images for: Transcriptomic Atlas of Human Trabecular Meshwork Uncovers the Cellular Landscape and Provides Insights into Glaucoma Pathophysiology
Source: Research Square preprint supplement (doi:10.21203/rs.3.rs-9540265/v1), 2026-06-22

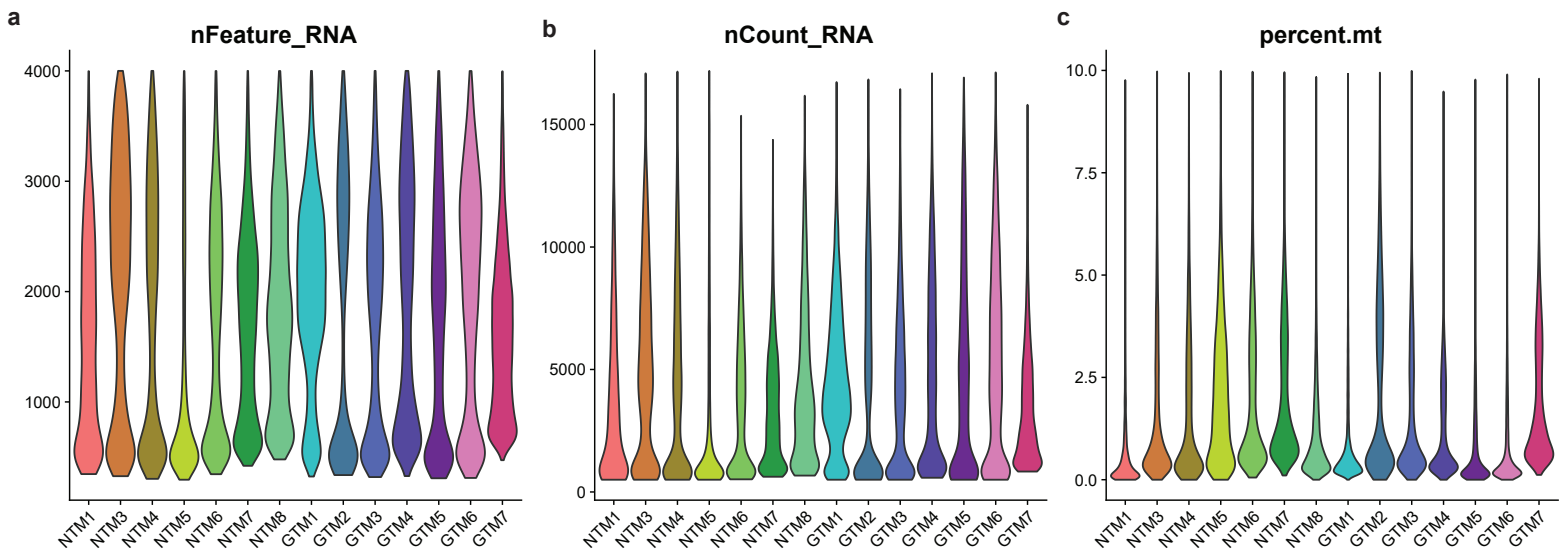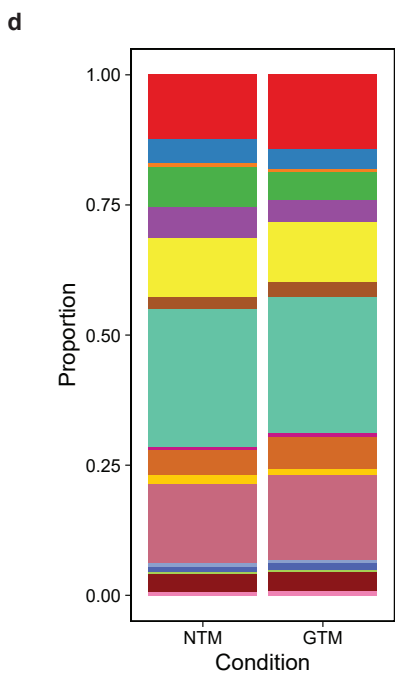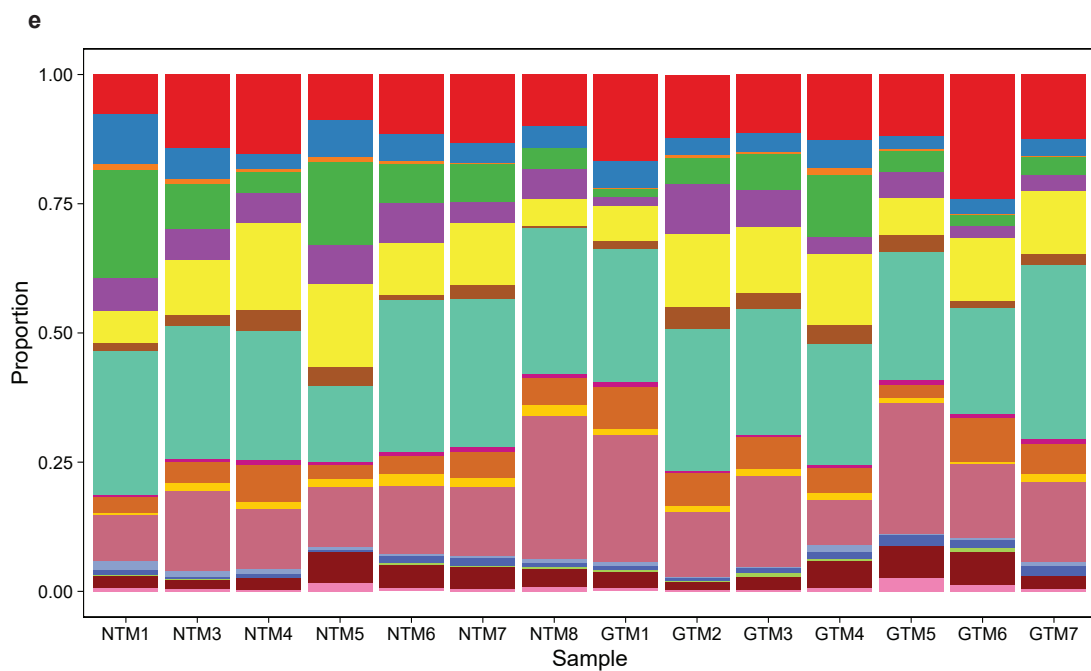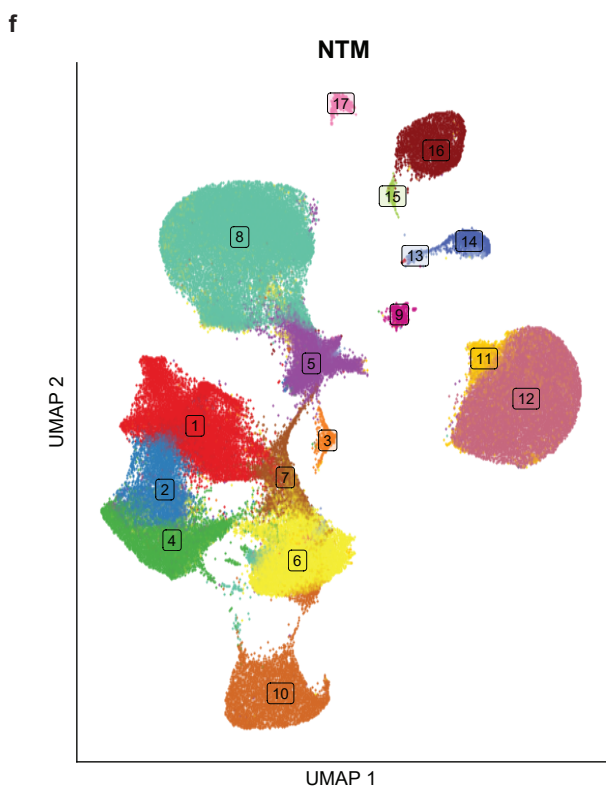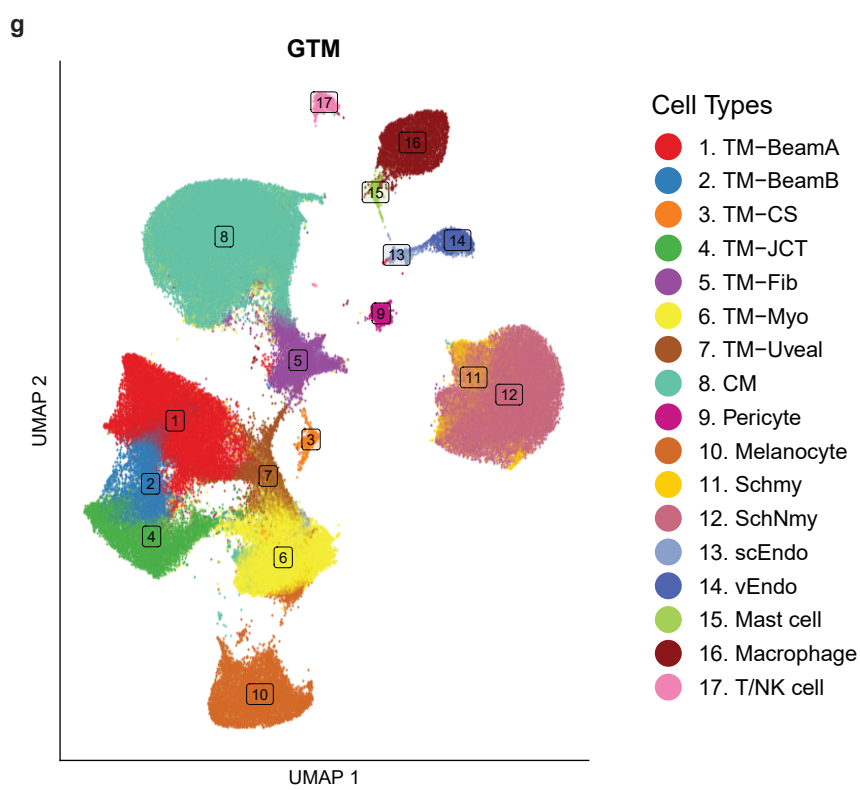

Supplement: Supplementary file 3 [file 368acbbf3d5734896278389a.pdf]

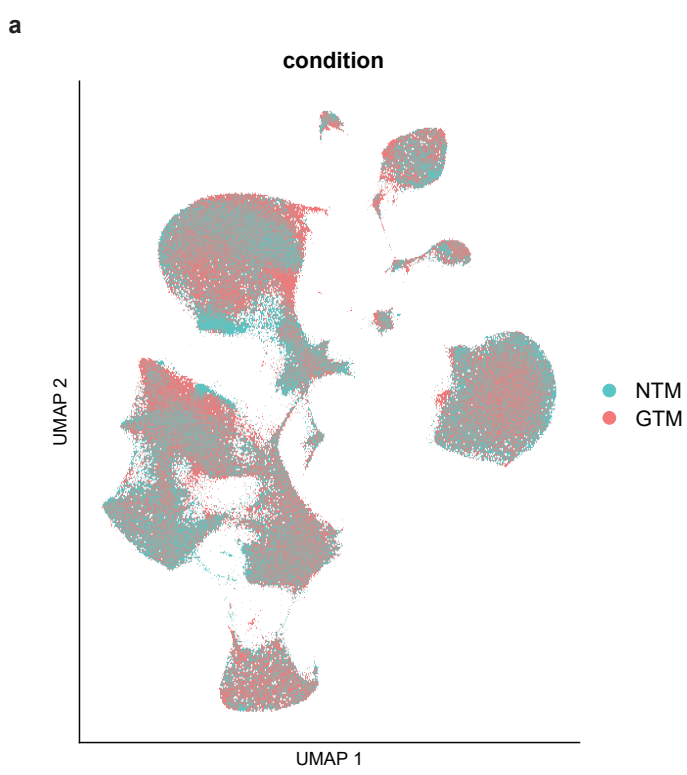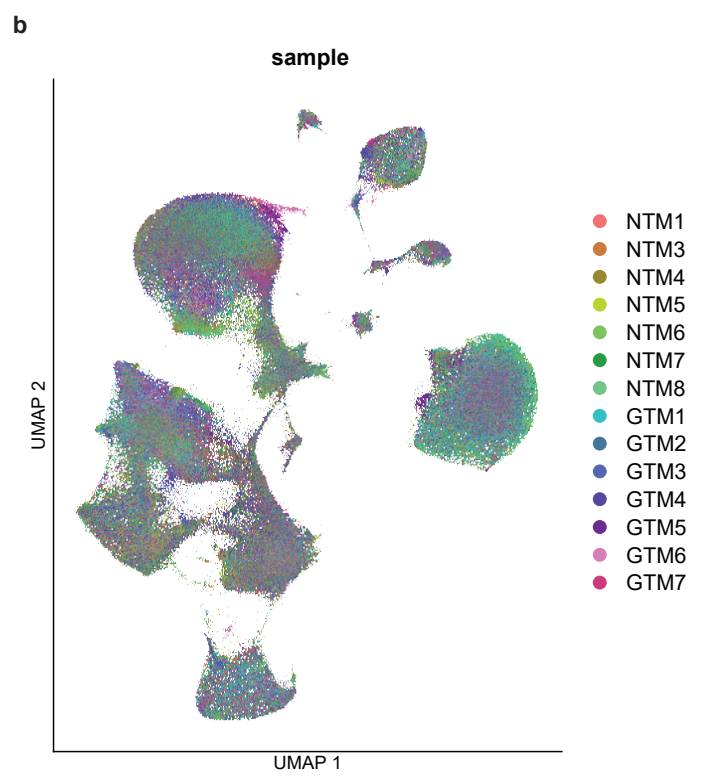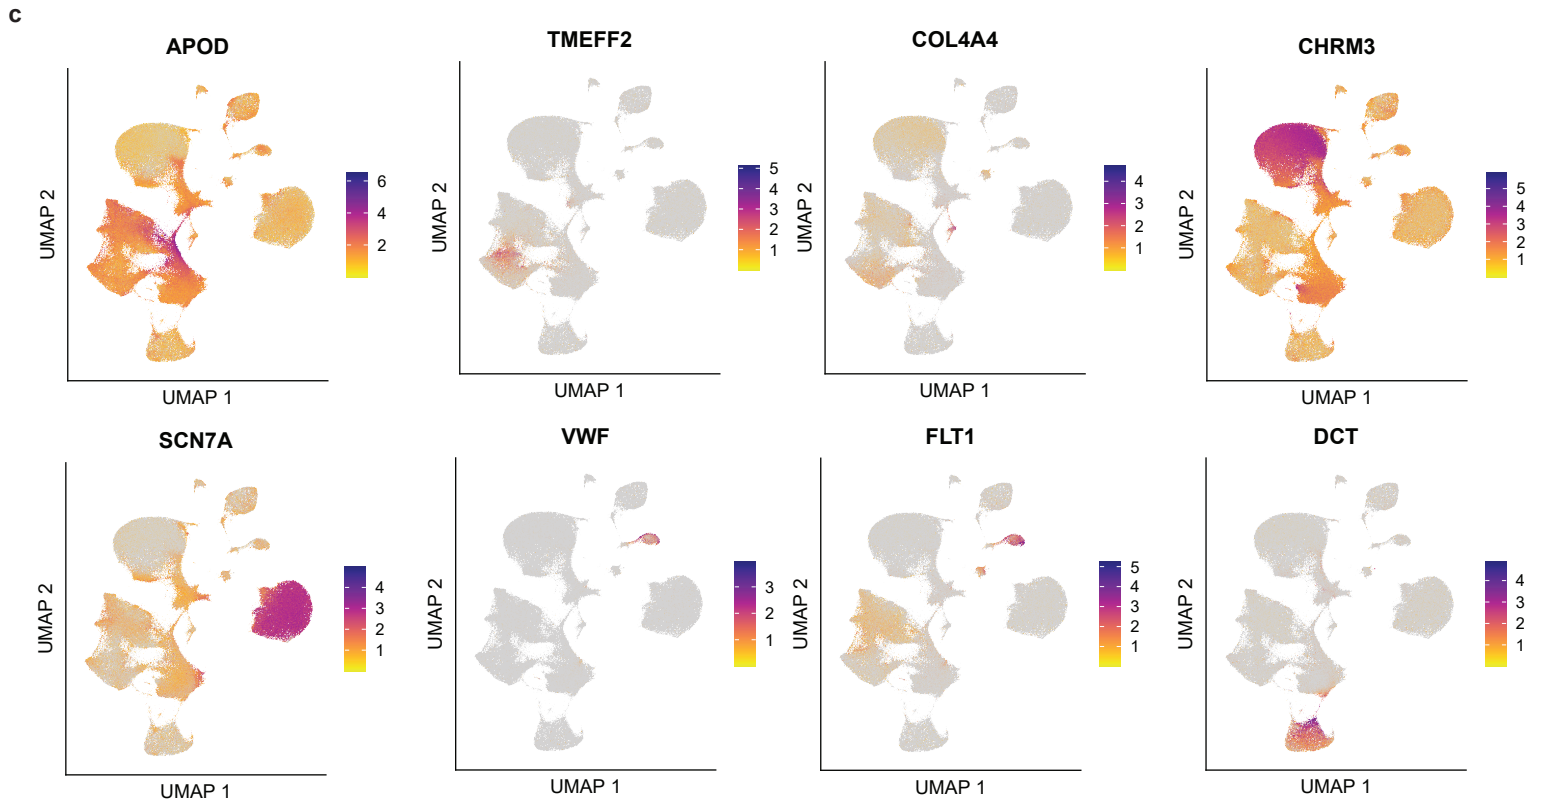

Supplement: Supplementary file 4 [file 4c1a39e0a0784d46391685ff.pdf]

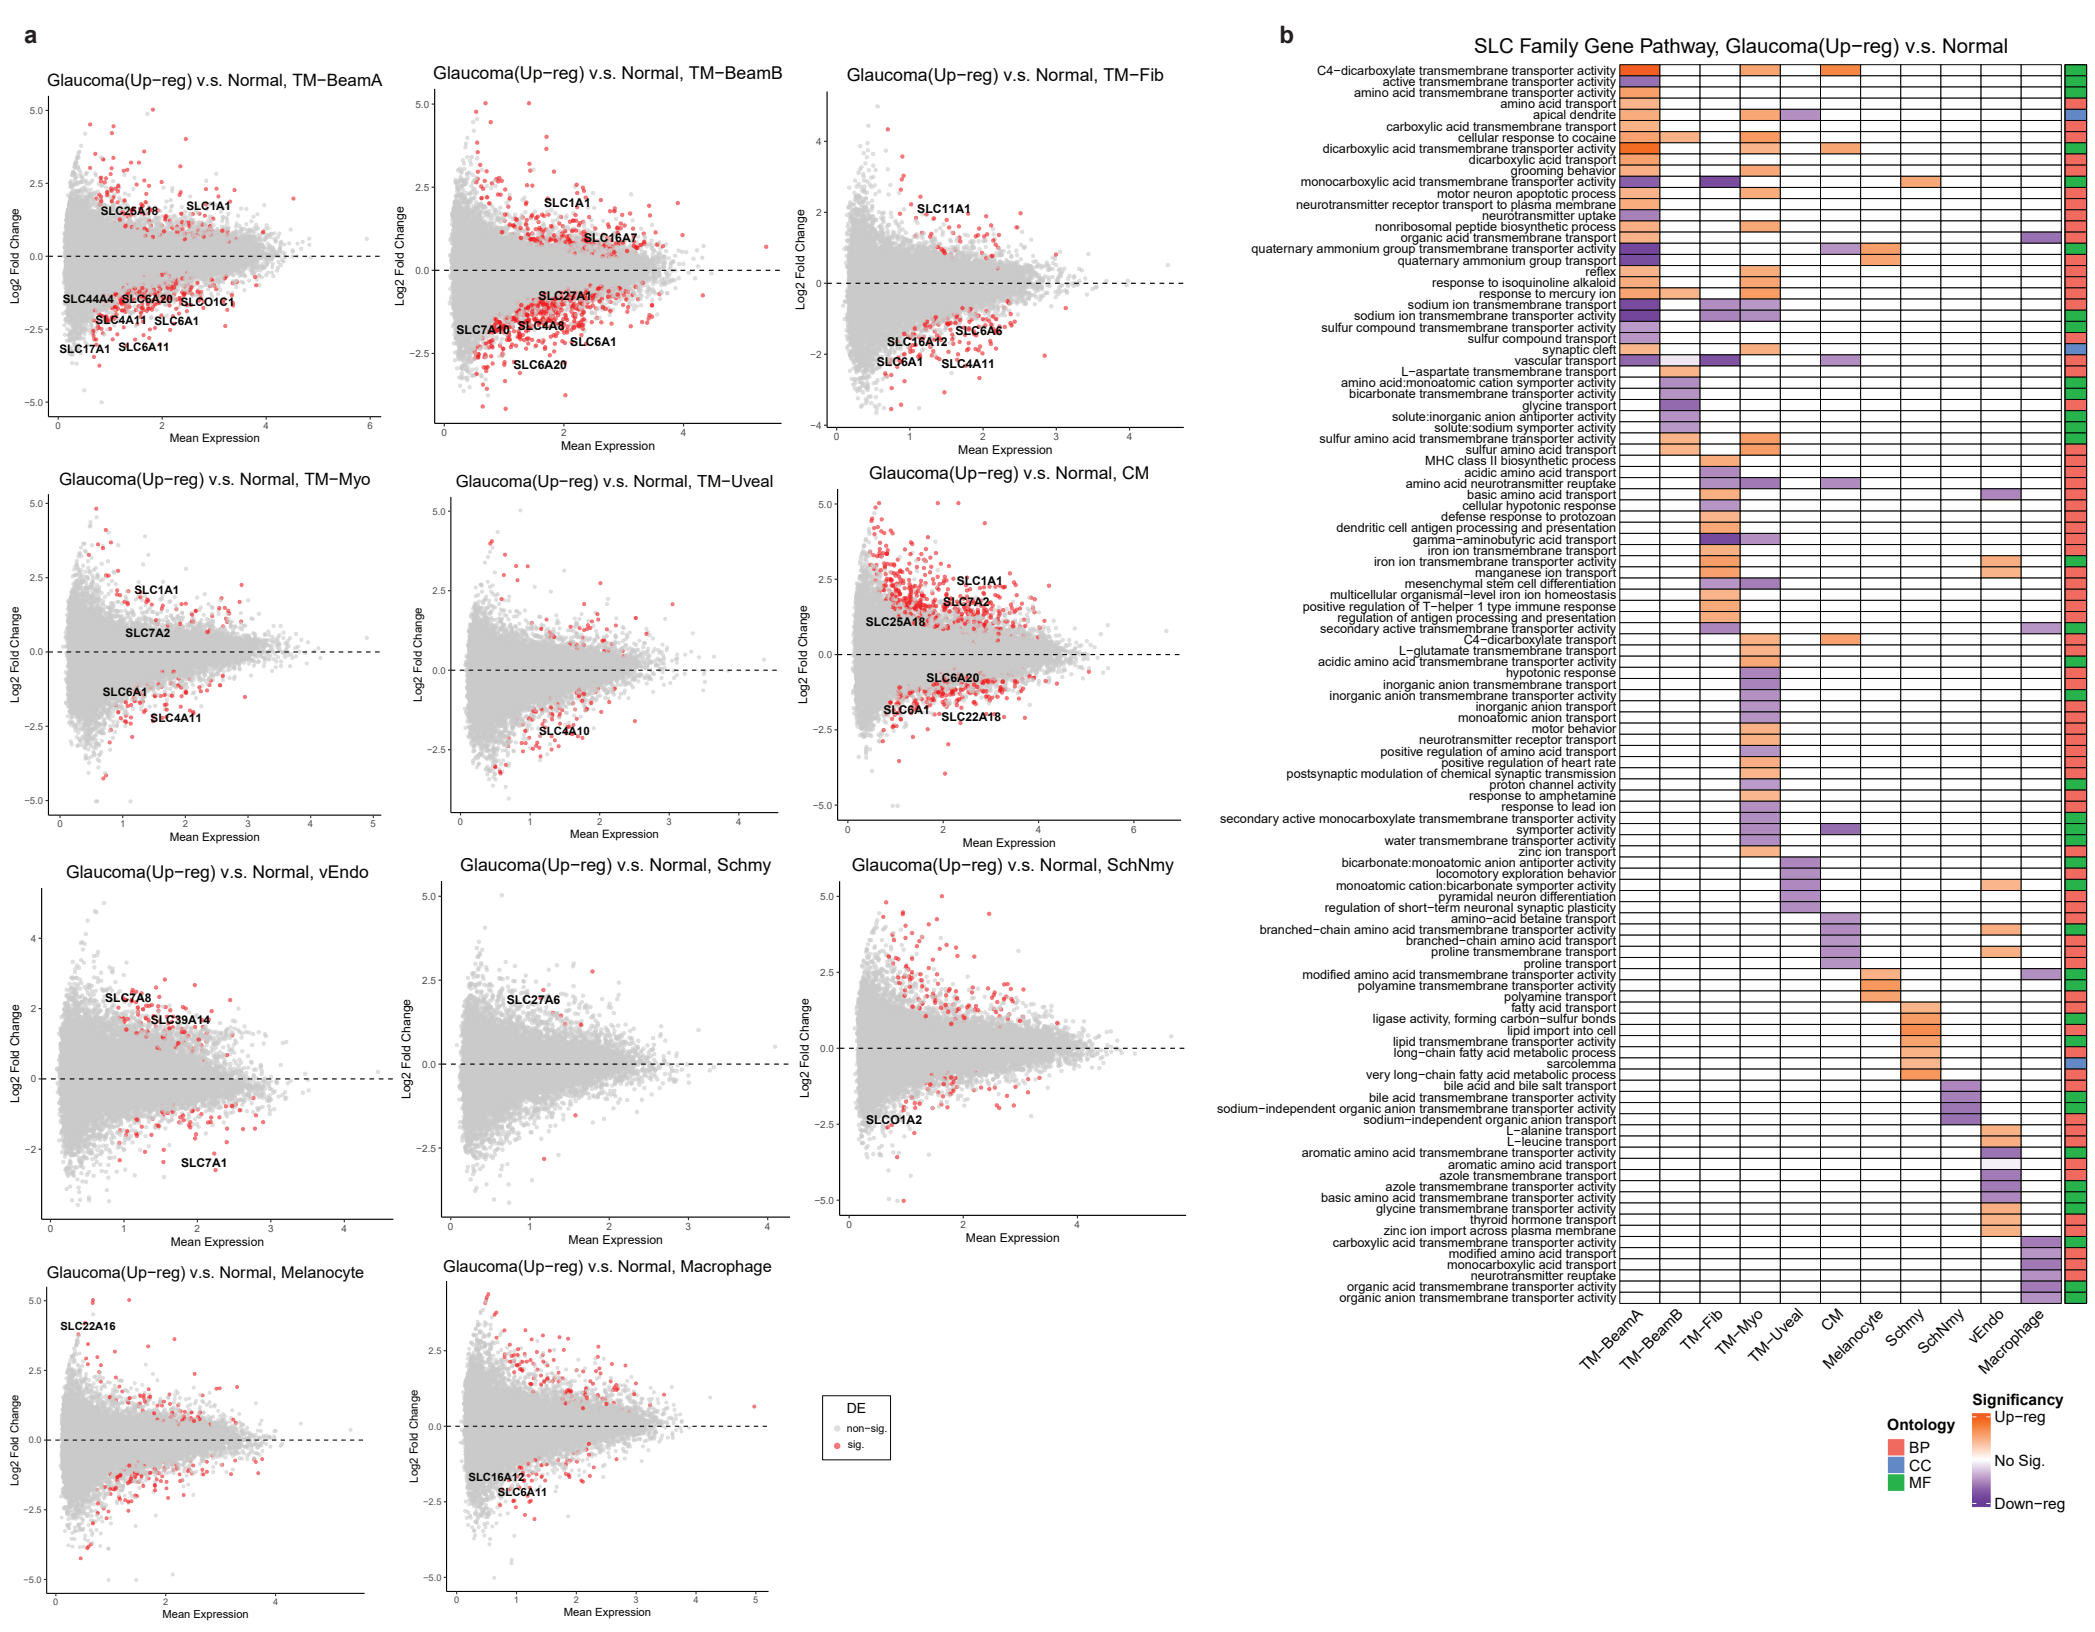

Supplement: Supplementary file 5 [file 54b4f9595b30491baceefbe2.pdf]

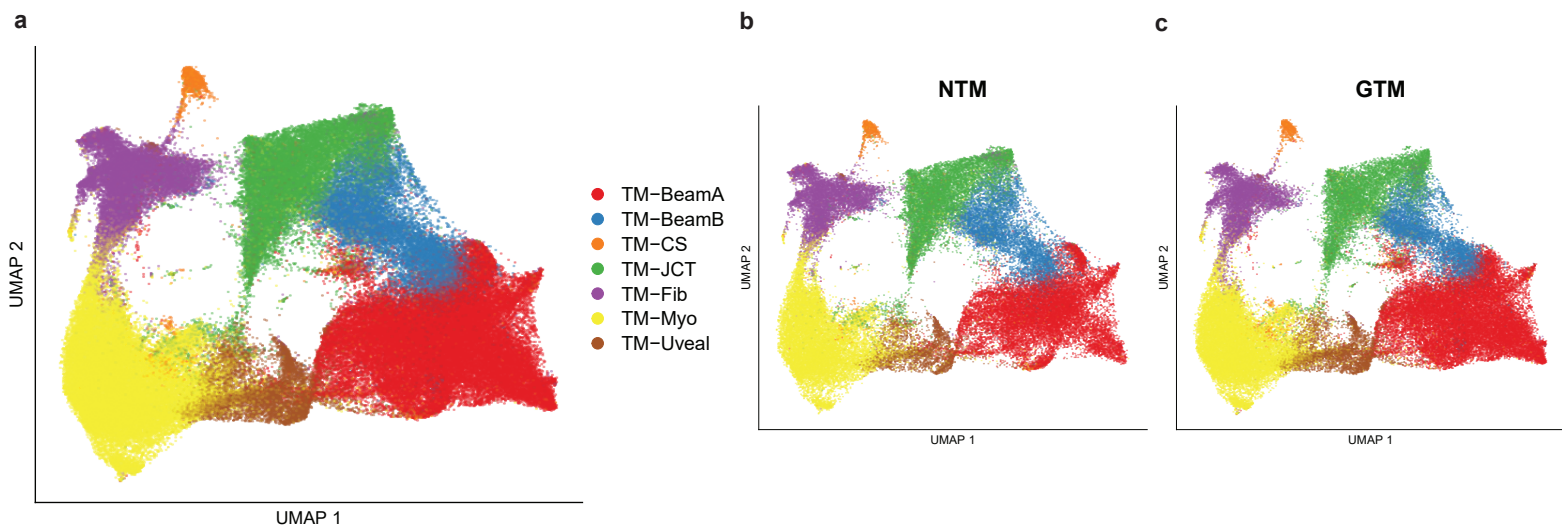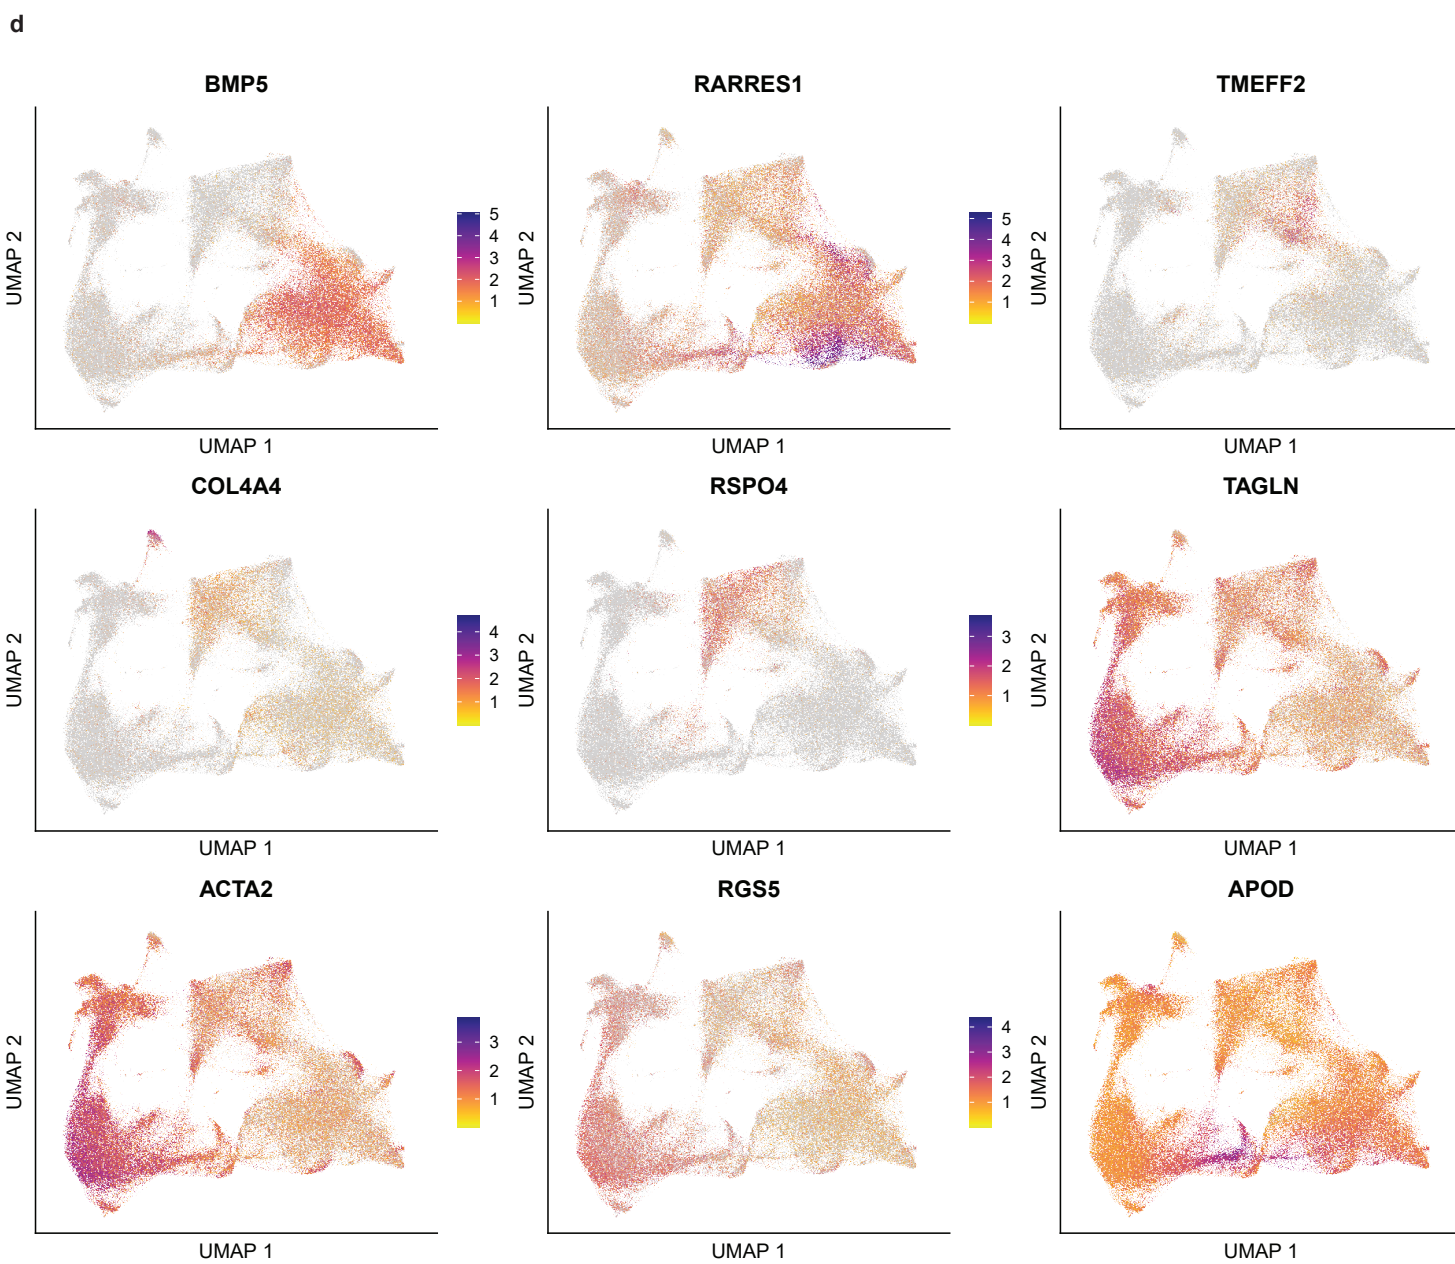

Supplement: Supplementary file 6 [file 550f5fbb5e434b06bea2a228.pdf]

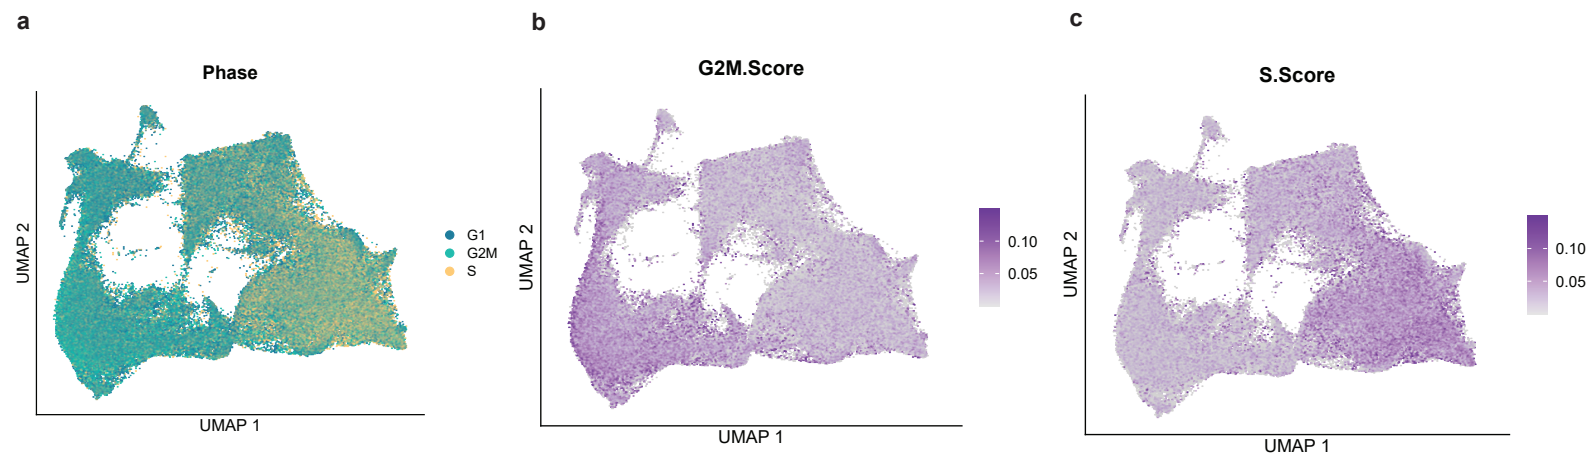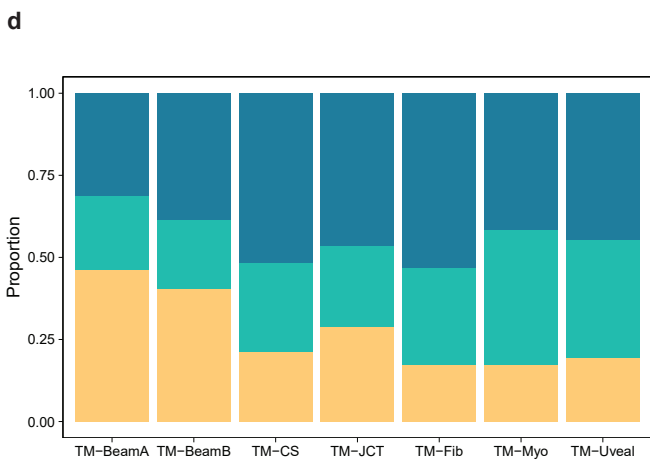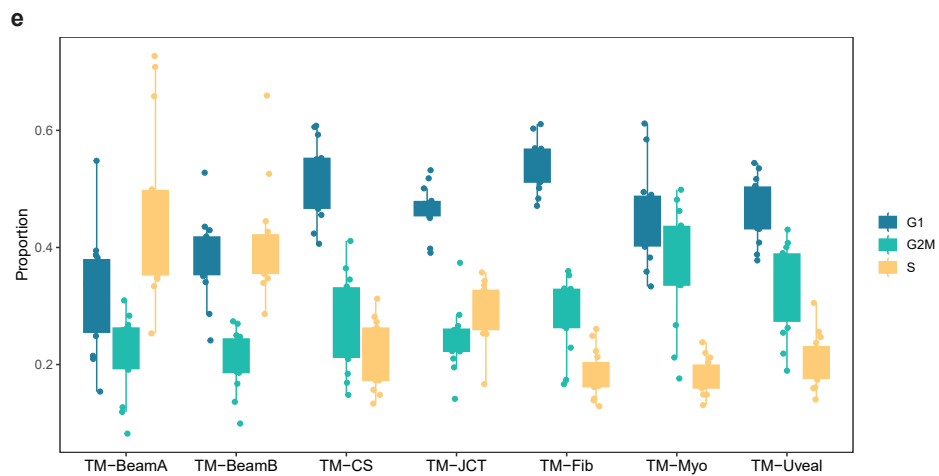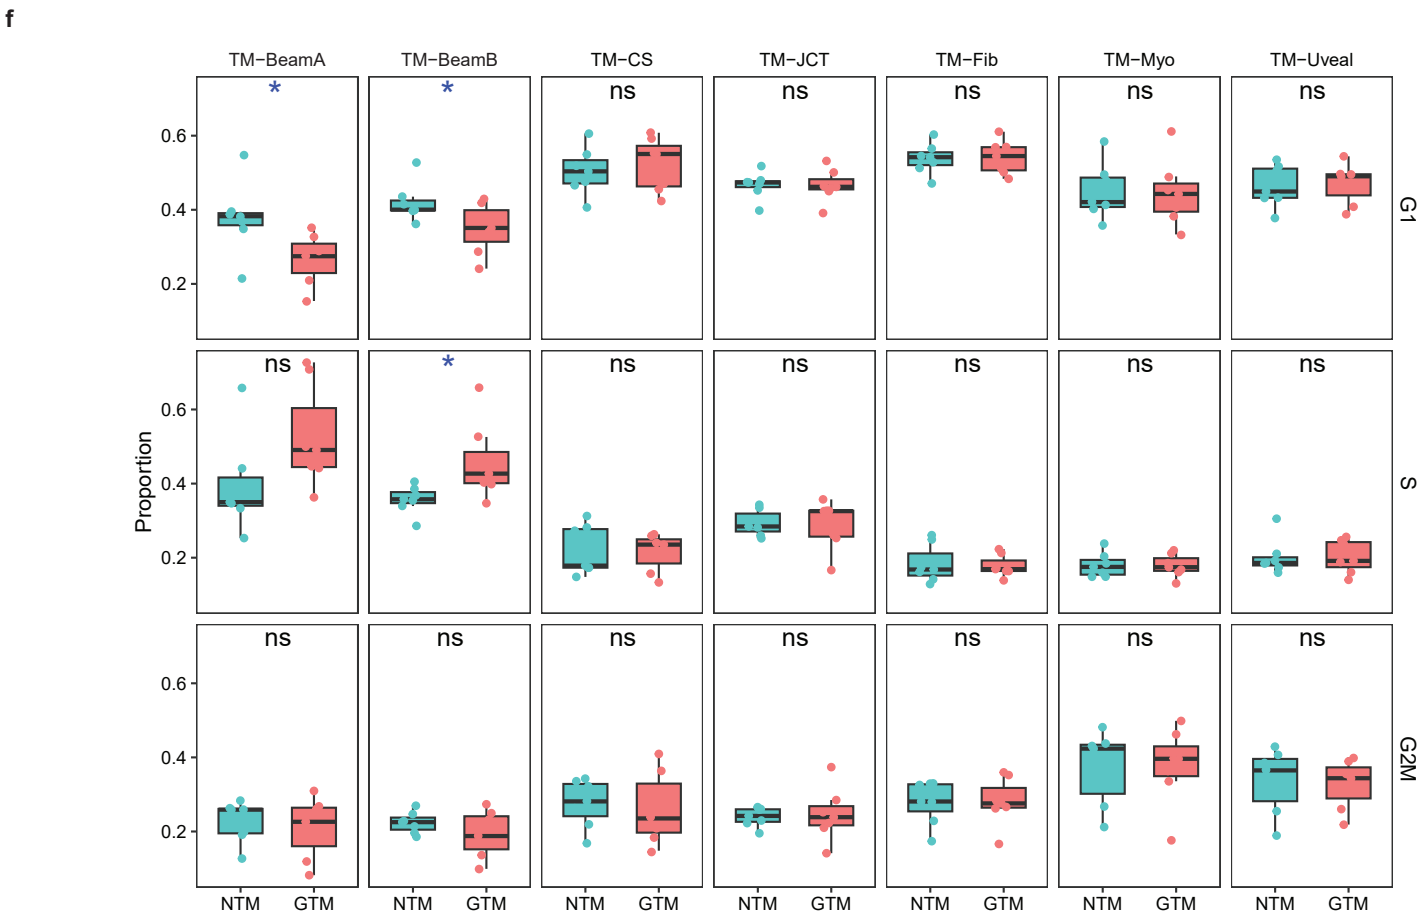

Supplement: Supplementary file 7 [file 62336c38be022c21692b1192.pdf]

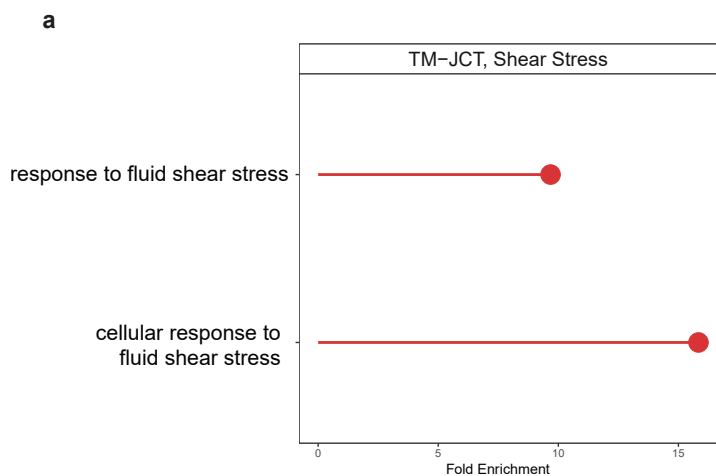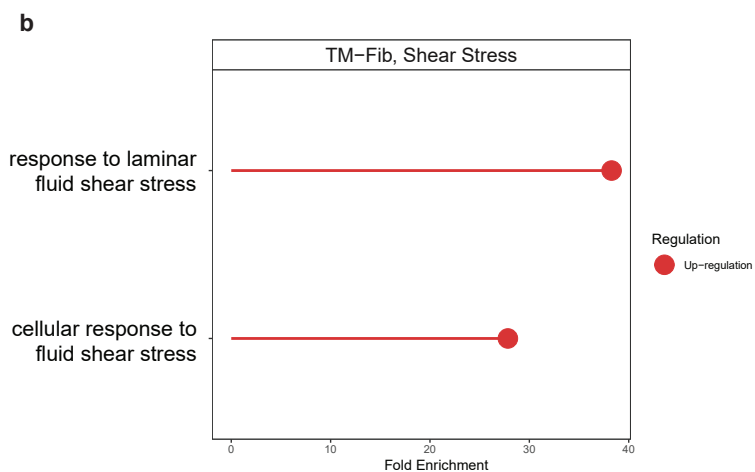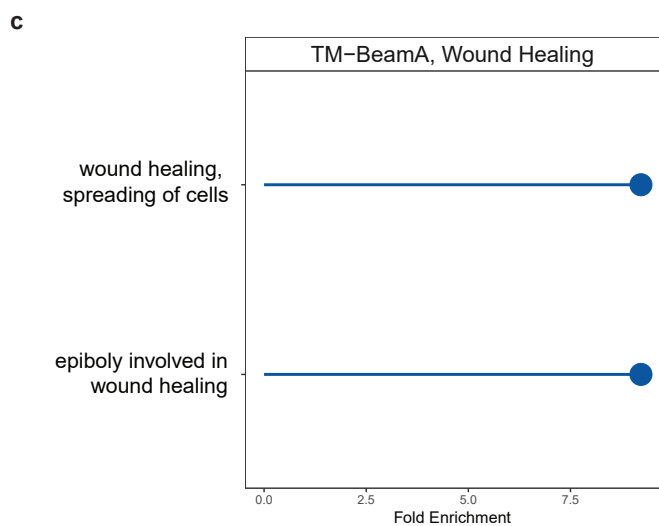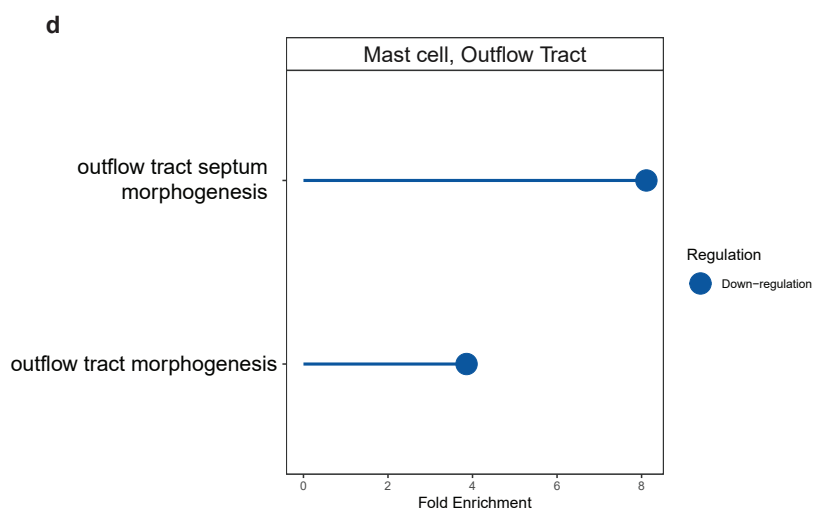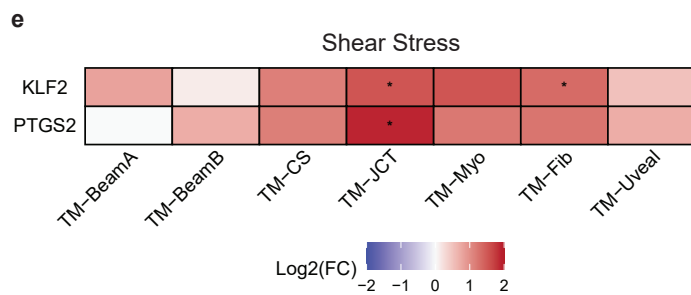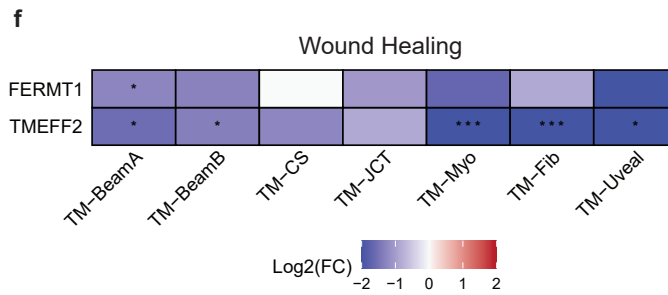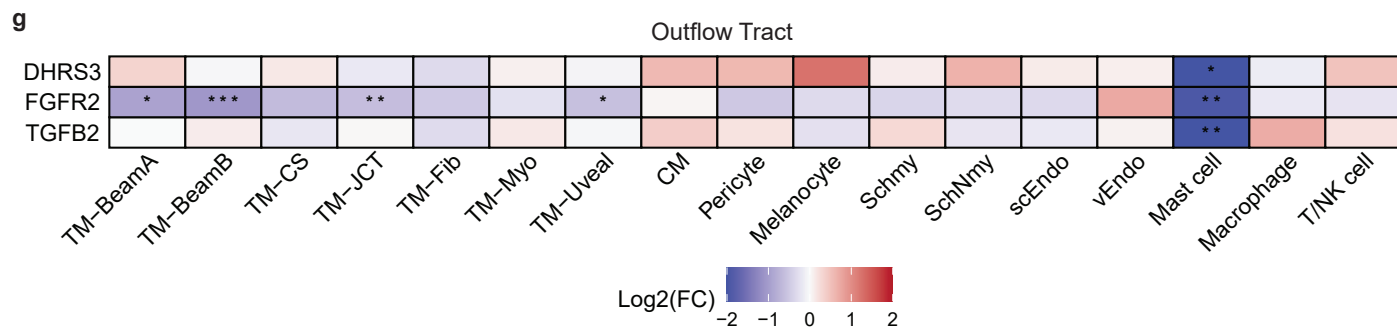

Supplement: Supplementary file 9 [file 704928f27a3becef42d5a8c5.pdf]

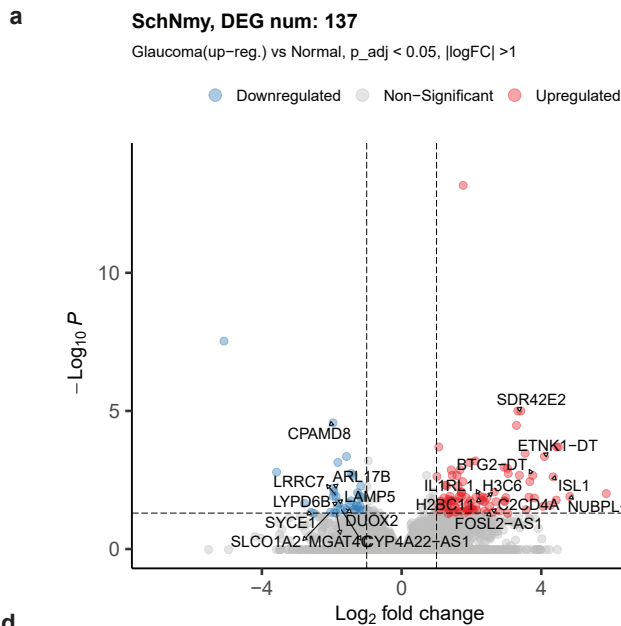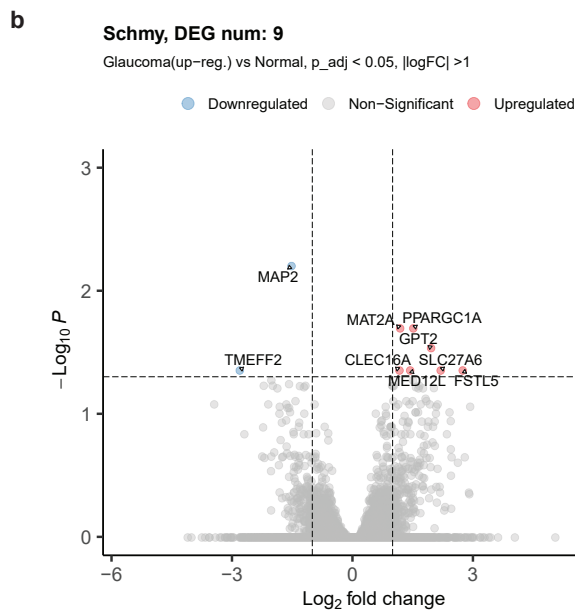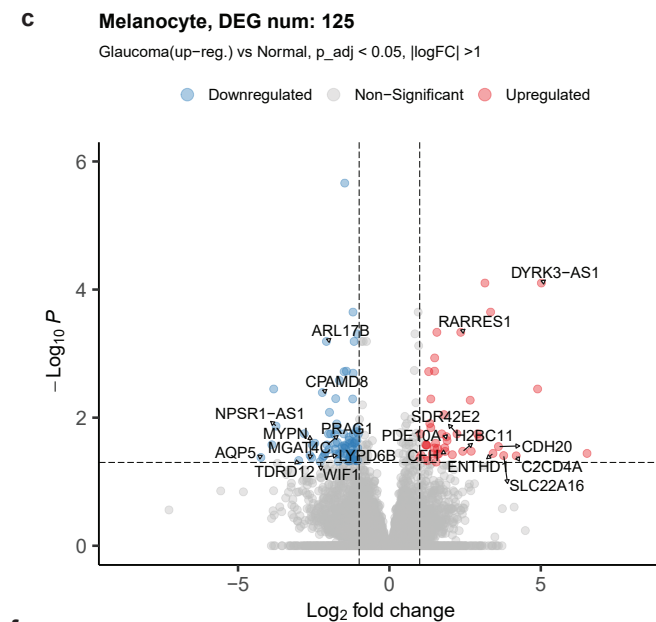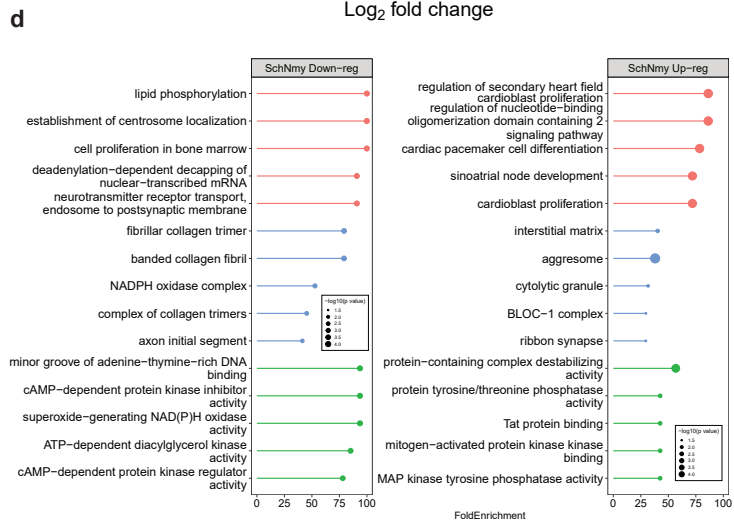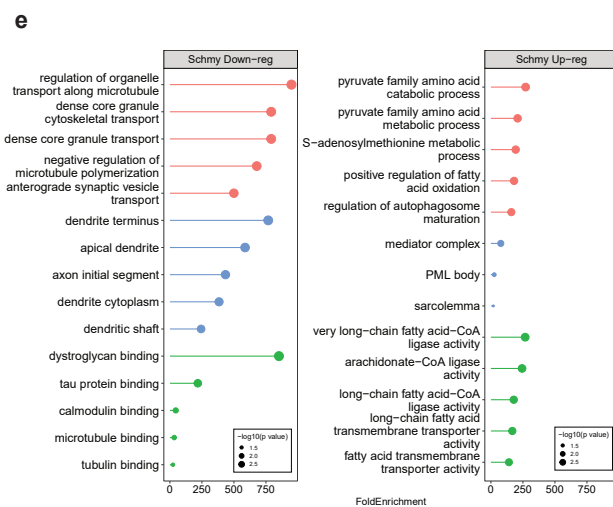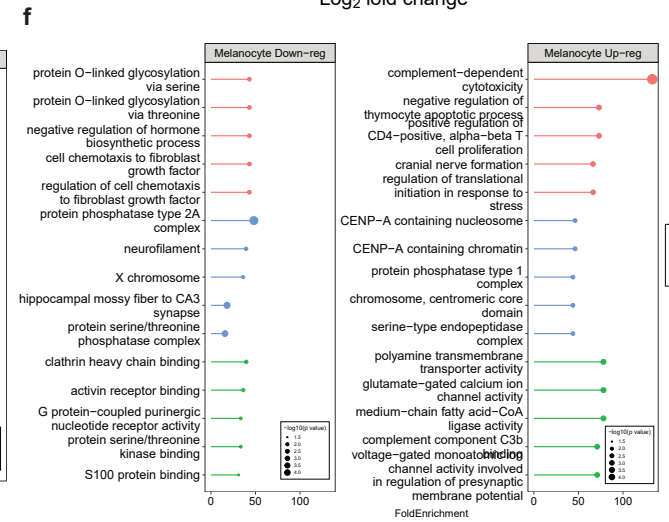

Supplement: Supplementary file 11 [file 7fc1ea7ad67479e1dca904c0.pdf]

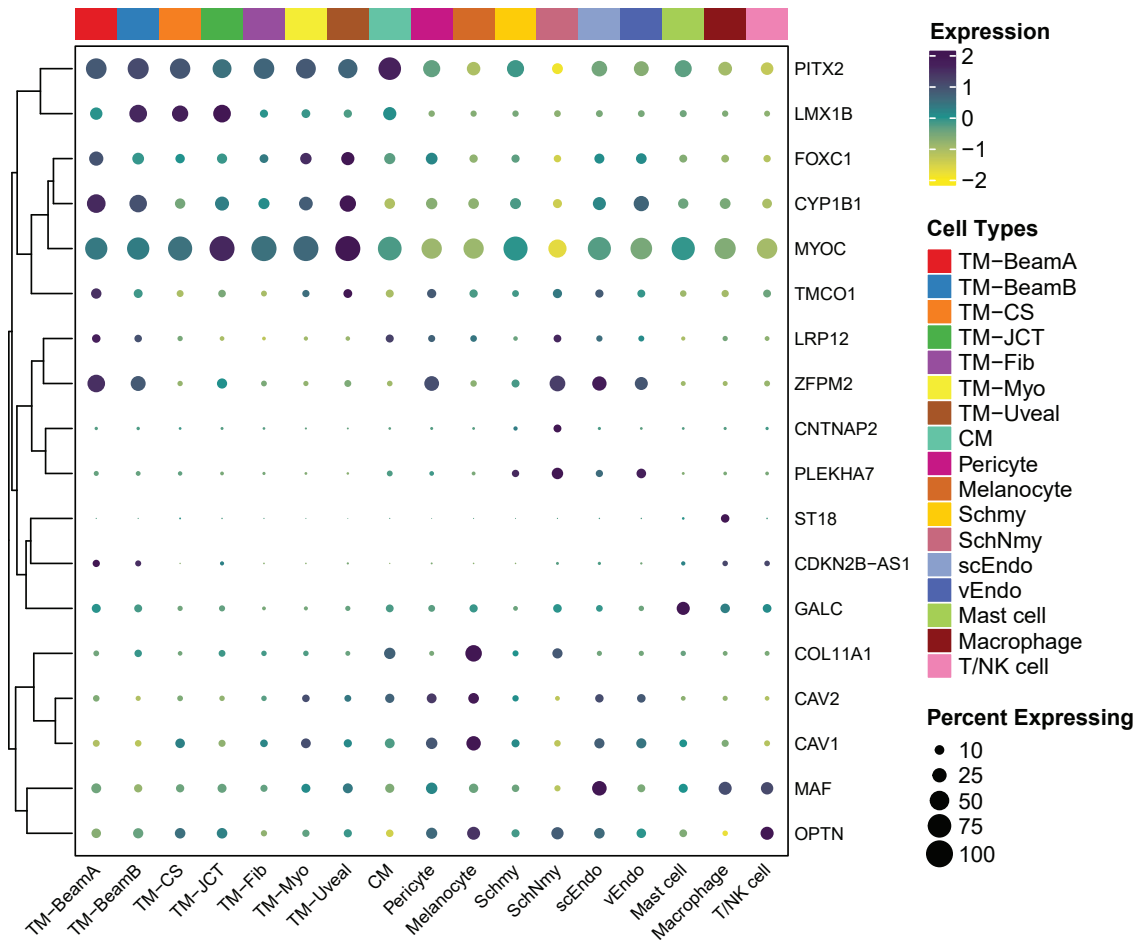

Supplement: Supplementary file 12 [file 8072697c1400ef94f4cee00d.pdf]

a

### Blunt TM Dissection

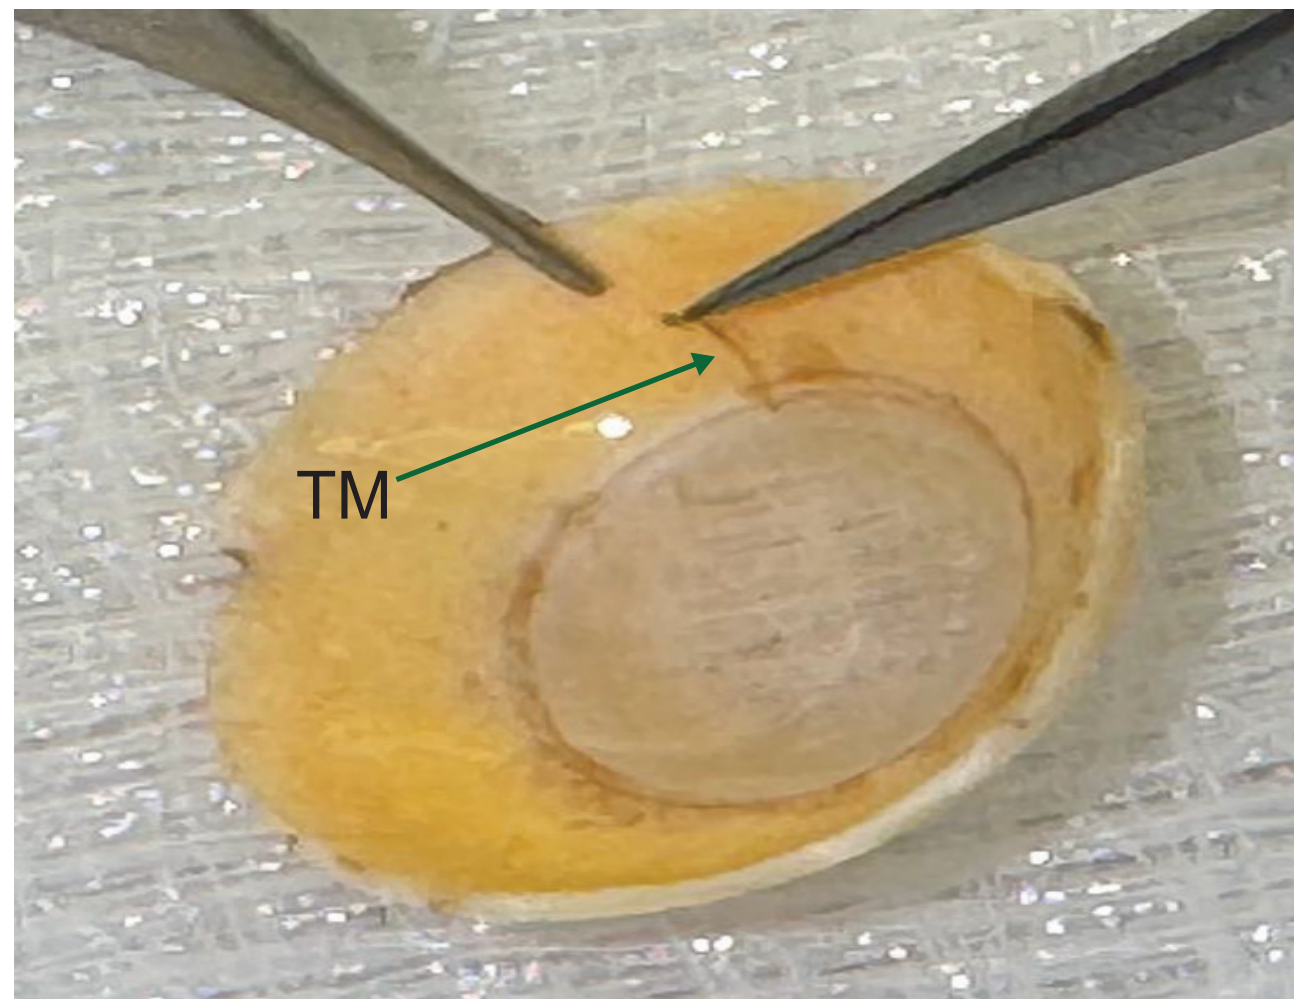

b

### Before TM dissection

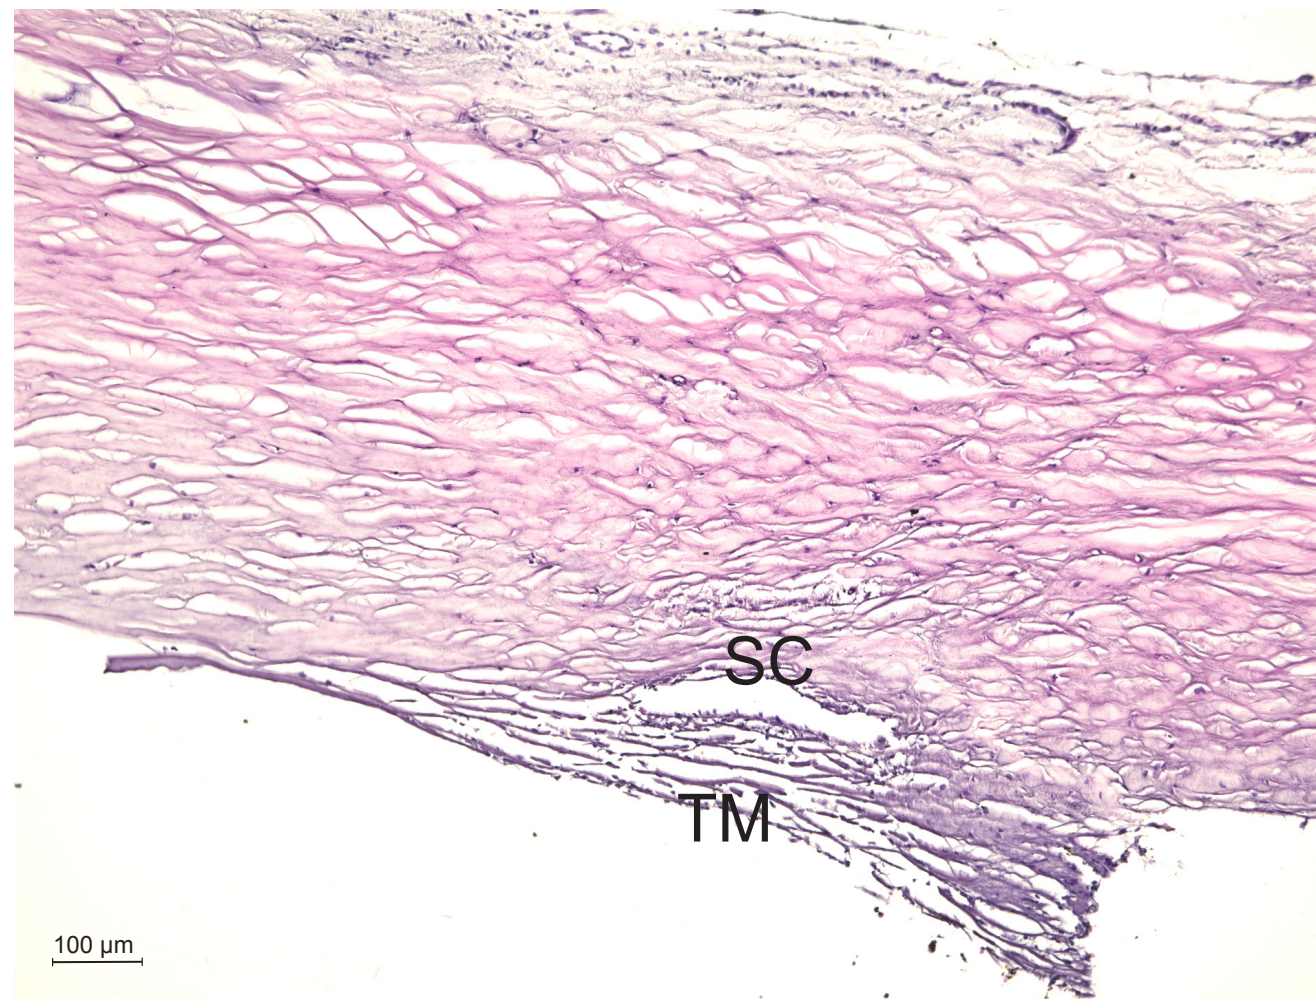

c

### After TM dissection

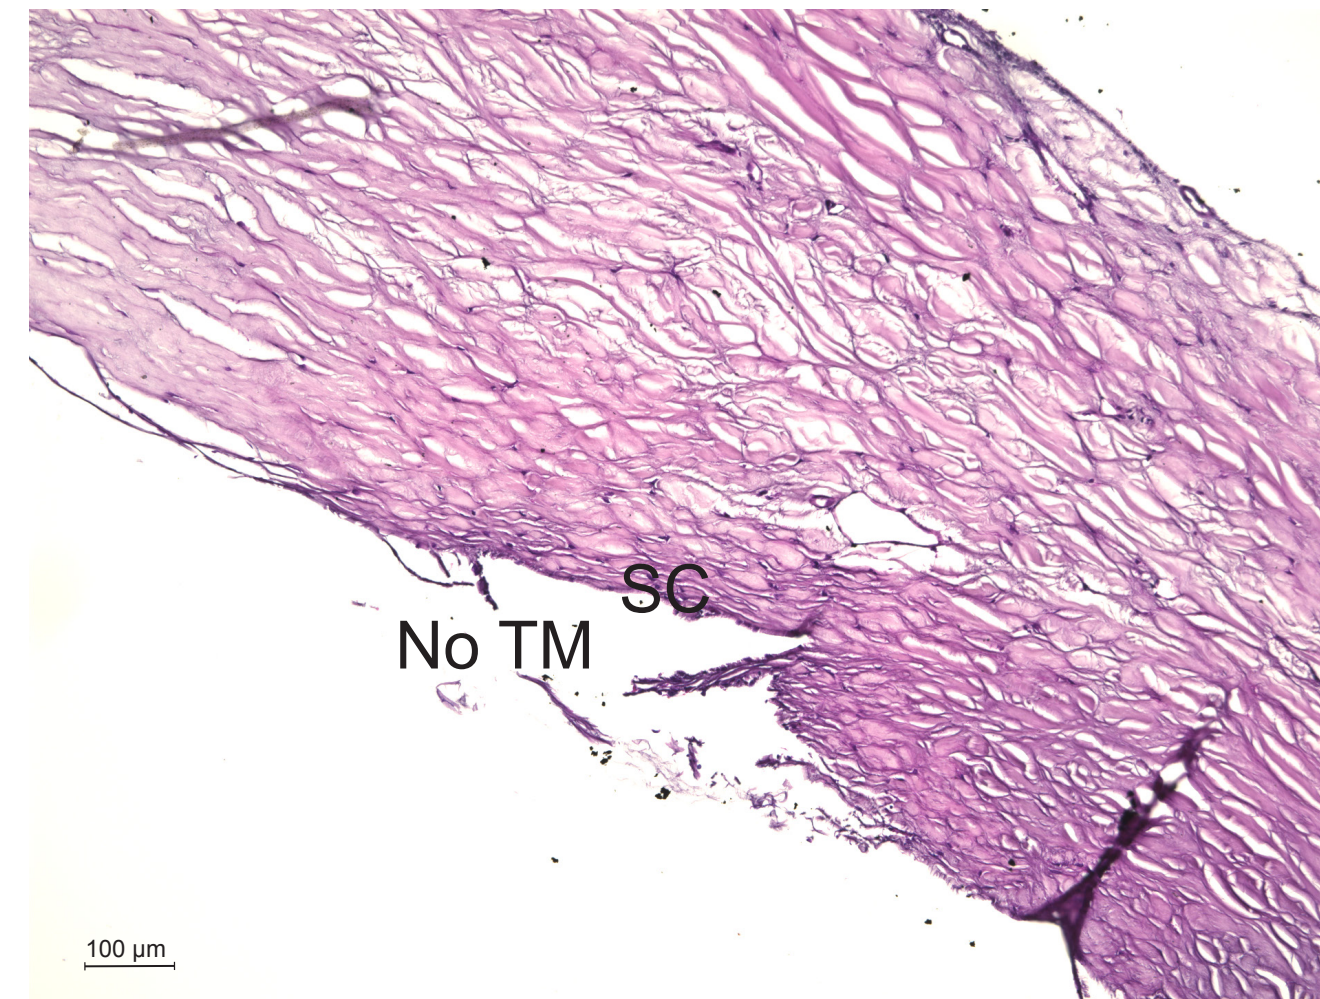

Supplement: Supplementary file 15 [file e3948eb2cfd6e5314cbe45a4.pdf]

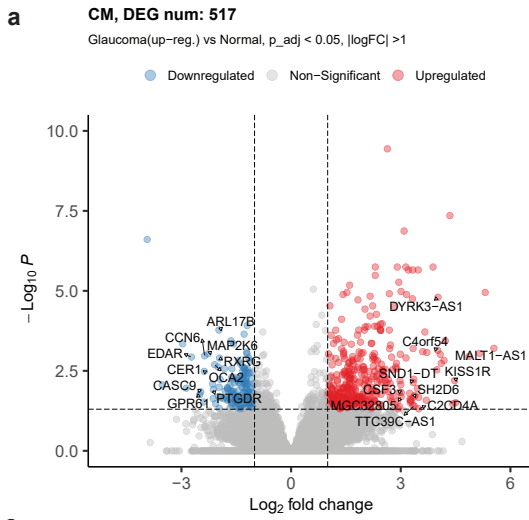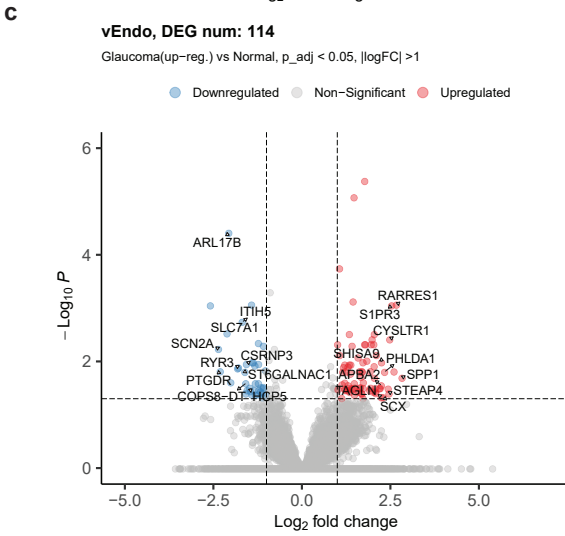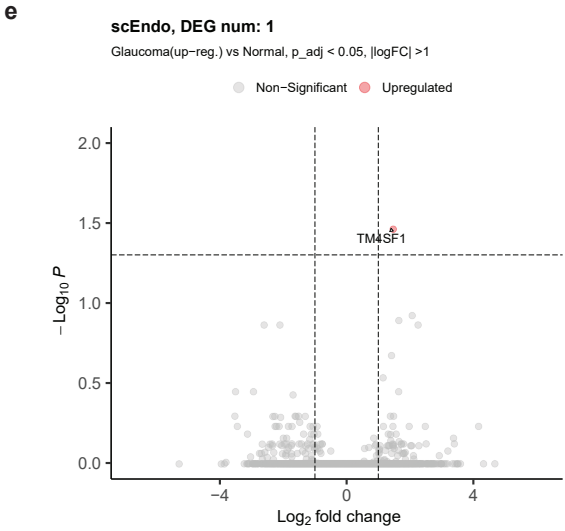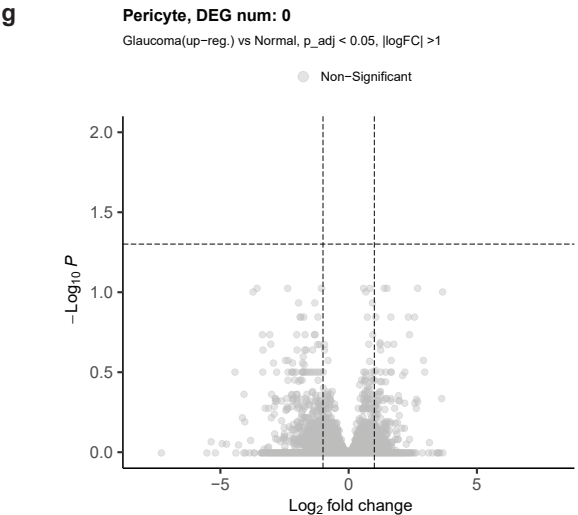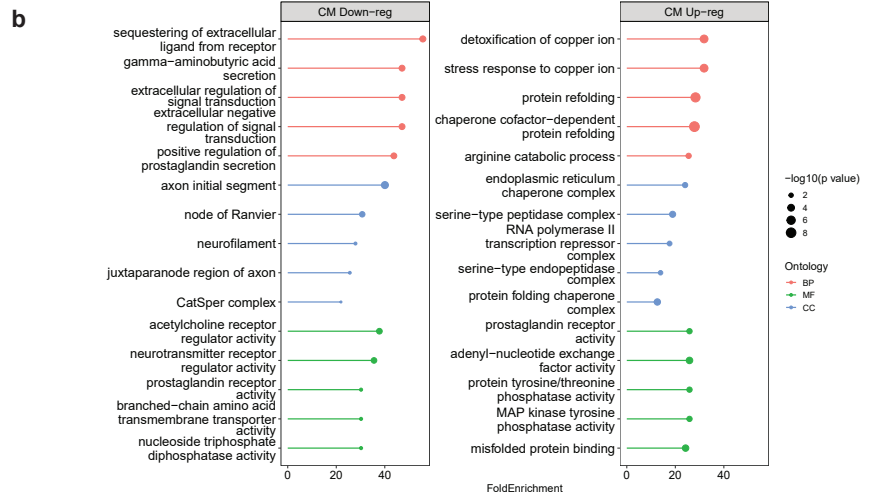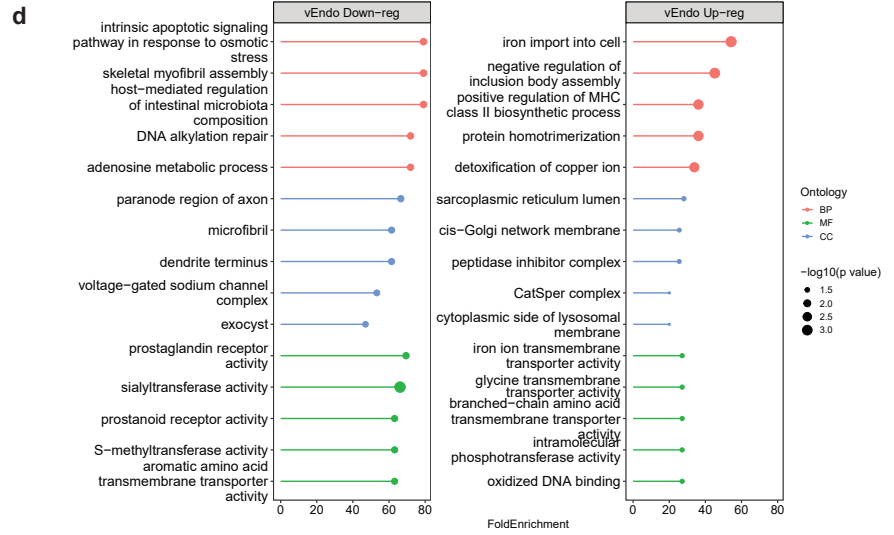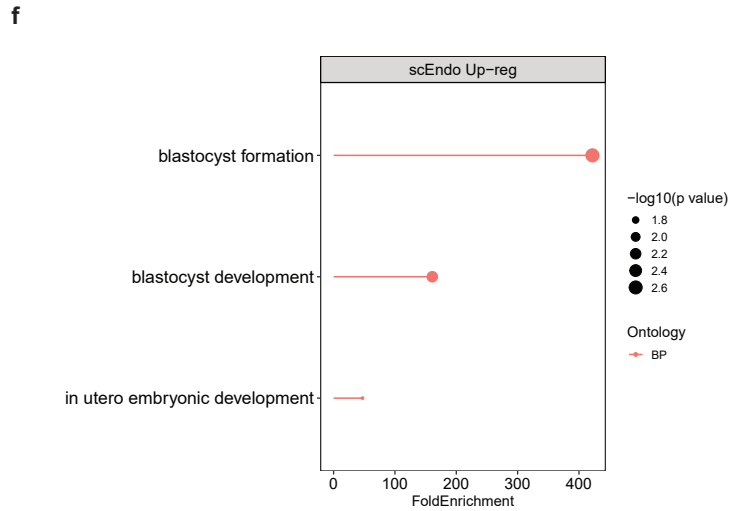

Supplement: Supplementary file 16 [file f9865f4c63cbc309aff5916d.pdf]
